# Supplementary material for: Customizing Pore System in a Microporous Metal–Organic Framework for Efficient C2H2 Separation from CO2 and C2H4
Source: MDPI journal article supplement (doi:10.3390/molecules27185929), 2022-09-12

## checkCIF/PLATON report

Structure factors have been supplied for datablock(s) NUM-14

THIS REPORT IS FOR GUIDANCE ONLY. IF USED AS PART OF A REVIEW PROCEDURE FOR PUBLICATION, IT SHOULD NOT REPLACE THE EXPERTISE OF AN EXPERIENCED CRYSTALLOGRAPHIC REFEREE.

No syntax errors found.      CIF dictionary      Interpreting this report

### Datablock: NUM-14

---

|                        |                                             |                                     |
|------------------------|---------------------------------------------|-------------------------------------|
| Bond precision:        | C-C = 0.0041 Å                              | Wavelength=1.54184                  |
| Cell:                  | a=15.1174 (1)<br>alpha=90                   | b=15.1174 (1)<br>beta=90            |
|                        |                                             | c=18.8520 (2)<br>gamma=120          |
| Temperature:           | 100 K                                       |                                     |
|                        | Calculated                                  | Reported                            |
| Volume                 | 3731.15 (6)                                 | 3731.14 (6)                         |
| Space group            | P 31 2 1                                    | P 31 2 1                            |
| Hall group             | P 31 2"                                     | P 31 2"                             |
| Moiety formula         | C26.13 H17.07 N7.02 Ni<br>O7.04 [+ solvent] | C26.129 H17.064 N7.021 Ni<br>O7.043 |
| Sum formula            | C26.13 H17.07 N7.02 Ni<br>O7.04 [+ solvent] | C26.13 H17.06 N7.02 Ni<br>O7.04     |
| Mr                     | 600.82                                      | 600.77                              |
| Dx, g cm <sup>-3</sup> | 0.802                                       | 0.802                               |
| Z                      | 3                                           | 3                                   |
| Mu (mm <sup>-1</sup> ) | 0.842                                       | 0.842                               |
| F000                   | 922.1                                       | 922.0                               |
| F000'                  | 915.97                                      |                                     |
| h, k, lmax             | 18, 18, 23                                  | 18, 18, 23                          |
| Nref                   | 5033 [ 2811]                                | 4864                                |
| Tmin, Tmax             | 0.817, 0.845                                | 0.862, 1.000                        |
| Tmin'                  | 0.777                                       |                                     |

Correction method= # Reported T Limits: Tmin=0.862 Tmax=1.000

AbsCorr = MULTI-SCAN

Data completeness= 1.73/0.97

Theta(max)= 73.614

R(reflections)= 0.0349( 4633)

wR2(reflections)=  
0.1010( 4864)

S = 1.062

Npar= 231

The following ALERTS were generated. Each ALERT has the format

**test-name\_ALERT\_alert-type\_alert-level.**

Click on the hyperlinks for more details of the test.

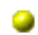

### Alert level C

|                   |                                         |        |      |                   |       |      |        |
|-------------------|-----------------------------------------|--------|------|-------------------|-------|------|--------|
| PLAT220_ALERT_2_C | NonSolvent                              | Resd 1 | N    | Ueq(max)/Ueq(min) | Range | 4.2  | Ratio  |
| PLAT220_ALERT_2_C | NonSolvent                              | Resd 1 | O    | Ueq(max)/Ueq(min) | Range | 4.0  | Ratio  |
| PLAT234_ALERT_4_C | Large Hirshfeld Difference              | O4     | --N5 | .                 |       | 0.17 | Ang.   |
| PLAT234_ALERT_4_C | Large Hirshfeld Difference              | O5     | --N5 | .                 |       | 0.17 | Ang.   |
| PLAT911_ALERT_3_C | Missing FCF Refl Between Thmin & STh/L= |        |      | 0.600             |       | 10   | Report |

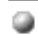

### Alert level G

|                   |                                                  |                    |                |   |  |       |              |
|-------------------|--------------------------------------------------|--------------------|----------------|---|--|-------|--------------|
| PLAT002_ALERT_2_G | Number of Distance or Angle Restraints on AtSite |                    |                |   |  | 4     | Note         |
| PLAT003_ALERT_2_G | Number of Uiso or Uij Restrained non-H Atoms ... |                    |                |   |  | 11    | Report       |
| PLAT004_ALERT_5_G | Polymeric Structure Found with Maximum Dimension |                    |                |   |  | 3     | Info         |
| PLAT007_ALERT_5_G | Number of Unrefined Donor-H Atoms .....          |                    |                |   |  | 2     | Report       |
| PLAT012_ALERT_1_G | N.O.K. _shelx_res_checksum Found in CIF .....    |                    |                |   |  |       | Please Check |
| PLAT033_ALERT_4_G | Flack x Value Deviates > 3.0 * sigma from Zero . |                    |                |   |  | 0.100 | Note         |
| PLAT041_ALERT_1_G | Calc. and Reported SumFormula Strings Differ     |                    |                |   |  |       | Please Check |
| PLAT042_ALERT_1_G | Calc. and Reported MoietyFormula Strings Differ  |                    |                |   |  |       | Please Check |
| PLAT172_ALERT_4_G | The CIF-Embedded .res File Contains DFIX Records |                    |                |   |  | 3     | Report       |
| PLAT178_ALERT_4_G | The CIF-Embedded .res File Contains SIMU Records |                    |                |   |  | 4     | Report       |
| PLAT186_ALERT_4_G | The CIF-Embedded .res File Contains ISOR Records |                    |                |   |  | 3     | Report       |
| PLAT187_ALERT_4_G | The CIF-Embedded .res File Contains RIGU Records |                    |                |   |  | 1     | Report       |
| PLAT230_ALERT_2_G | Hirshfeld Test Diff for                          | O5                 | --C16_d        | . |  | 9.5   | s.u.         |
| PLAT230_ALERT_2_G | Hirshfeld Test Diff for                          | N5                 | --C13          | . |  | 11.1  | s.u.         |
| PLAT230_ALERT_2_G | Hirshfeld Test Diff for                          | C11                | --C12          | . |  | 18.5  | s.u.         |
| PLAT230_ALERT_2_G | Hirshfeld Test Diff for                          | C11                | --C17_d        | . |  | 9.2   | s.u.         |
| PLAT230_ALERT_2_G | Hirshfeld Test Diff for                          | C17                | --C11_d        | . |  | 9.2   | s.u.         |
| PLAT300_ALERT_4_G | Atom Site Occupancy of H1A                       |                    | Constrained at |   |  | 0.5   | Check        |
| PLAT300_ALERT_4_G | Atom Site Occupancy of H1B                       |                    | Constrained at |   |  | 0.5   | Check        |
| PLAT301_ALERT_3_G | Main Residue Disorder .....                      | (Resd 1 )          |                |   |  | 21%   | Note         |
| PLAT335_ALERT_2_G | Check Large C6 Ring C-C Range                    | C12                | -C17           |   |  | 0.16  | Ang.         |
| PLAT414_ALERT_2_G | Short Intra D-H..H-X                             | H1B                | ..H4           | . |  | 2.13  | Ang.         |
|                   |                                                  | 1+y,-1+x,1-z =     |                |   |  | 4_646 | Check        |
| PLAT415_ALERT_2_G | Short Inter D-H..H-X                             | H1A                | ..H4           | . |  | 2.13  | Ang.         |
|                   |                                                  | 1-y,-1+x-y,1/3+z = |                |   |  | 2_645 | Check        |
| PLAT606_ALERT_4_G | Solvent Accessible VOID(S) in Structure .....    |                    |                |   |  | !     | Info         |
| PLAT773_ALERT_2_G | Check long C-C Bond in CIF: C11                  | --C12              |                |   |  | 1.74  | Ang.         |
| PLAT789_ALERT_4_G | Atoms with Negative _atom_site_disorder_group #  |                    |                |   |  | 12    | Check        |
| PLAT860_ALERT_3_G | Number of Least-Squares Restraints .....         |                    |                |   |  | 117   | Note         |
| PLAT912_ALERT_4_G | Missing # of FCF Reflections Above STh/L=        | 0.600              |                |   |  | 39    | Note         |
| PLAT913_ALERT_3_G | Missing # of Very Strong Reflections in FCF .... |                    |                |   |  | 1     | Note         |
| PLAT933_ALERT_2_G | Number of HKL-OMIT Records in Embedded .res File |                    |                |   |  | 5     | Note         |
| PLAT941_ALERT_3_G | Average HKL Measurement Multiplicity .....       |                    |                |   |  | 4.5   | Low          |
| PLAT978_ALERT_2_G | Number C-C Bonds with Positive Residual Density. |                    |                |   |  | 0     | Info         |

0 **ALERT level A** = Most likely a serious problem - resolve or explain

0 **ALERT level B** = A potentially serious problem, consider carefully  
5 **ALERT level C** = Check. Ensure it is not caused by an omission or oversight  
32 **ALERT level G** = General information/check it is not something unexpected

3 ALERT type 1 CIF construction/syntax error, inconsistent or missing data  
15 ALERT type 2 Indicator that the structure model may be wrong or deficient  
5 ALERT type 3 Indicator that the structure quality may be low  
12 ALERT type 4 Improvement, methodology, query or suggestion  
2 ALERT type 5 Informative message, check

---

It is advisable to attempt to resolve as many as possible of the alerts in all categories. Often the minor alerts point to easily fixed oversights, errors and omissions in your CIF or refinement strategy, so attention to these fine details can be worthwhile. In order to resolve some of the more serious problems it may be necessary to carry out additional measurements or structure refinements. However, the purpose of your study may justify the reported deviations and the more serious of these should normally be commented upon in the discussion or experimental section of a paper or in the "special\_details" fields of the CIF. checkCIF was carefully designed to identify outliers and unusual parameters, but every test has its limitations and alerts that are not important in a particular case may appear. Conversely, the absence of alerts does not guarantee there are no aspects of the results needing attention. It is up to the individual to critically assess their own results and, if necessary, seek expert advice.

### **Publication of your CIF in IUCr journals**

A basic structural check has been run on your CIF. These basic checks will be run on all CIFs submitted for publication in IUCr journals (*Acta Crystallographica*, *Journal of Applied Crystallography*, *Journal of Synchrotron Radiation*); however, if you intend to submit to *Acta Crystallographica Section C* or *E* or *IUCrData*, you should make sure that full publication checks are run on the final version of your CIF prior to submission.

### **Publication of your CIF in other journals**

Please refer to the *Notes for Authors* of the relevant journal for any special instructions relating to CIF submission.

---

**PLATON version of 18/05/2022; check.def file version of 17/05/2022**

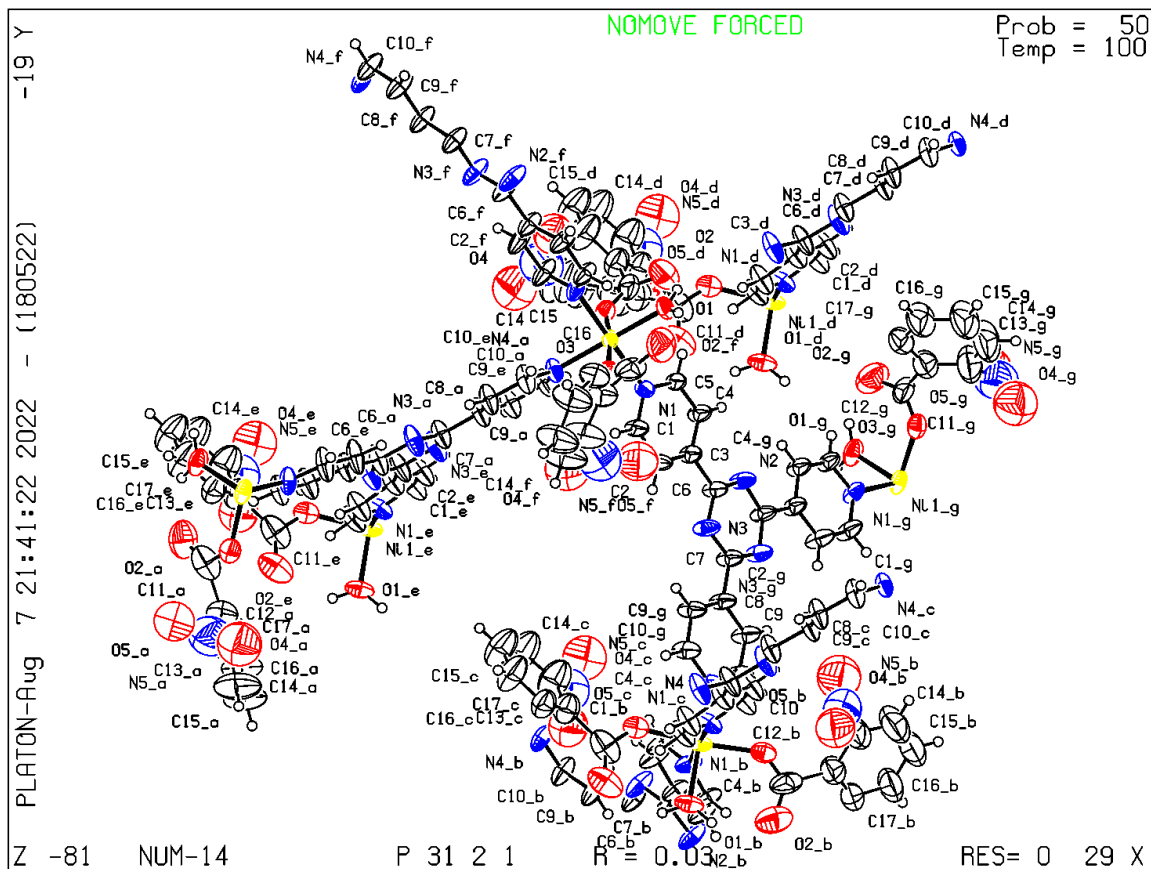

Supplement: s1 [file s1]
