# Supplementary material for: Customizing Pore System in a Microporous Metal–Organic Framework for Efficient C2H2 Separation from CO2 and C2H4
Source: MDPI journal article supplement (doi:10.3390/molecules27185929), 2022-09-12
Supplement: s1 [file s1]

## **Supporting Information**

### **Customizing Pore System in a Microporous Metal-Organic Framework for Efficient C<sub>2</sub>H<sub>2</sub> Separation from CO<sub>2</sub> and C<sub>2</sub>H<sub>4</sub>**

Qiang Zhang<sup>†</sup>, Guan-Nan Han<sup>†</sup>, Xin Lian, Shan-QingYang, Tong-Liang Hu\*

School of Materials Science and Engineering, National Institute for Advanced Materials, Nankai University, Tianjin 300350, China.

\* Correspondence: tlhu@nankai.edu.cn (T.-L. Hu)

<sup>†</sup> These authors contributed equally to this work.

**Table S1.** Crystal data and structure refinement parameters for **NUM-14**

|                                           |                                                                 |
|-------------------------------------------|-----------------------------------------------------------------|
| Empirical formula                         | C <sub>26</sub> H <sub>17</sub> N <sub>7</sub> NiO <sub>7</sub> |
| Formula weight (g mol <sup>-1</sup> )     | 607.82                                                          |
| Crystal system                            | trigonal                                                        |
| <i>Space group</i>                        | <i>P</i> 3 <sub>1</sub> 21                                      |
| a (Å)                                     | 15.11740(1)                                                     |
| b (Å)                                     | 15.11740(1)                                                     |
| c (Å)                                     | 18.8520(2)                                                      |
| α(°)                                      | 90                                                              |
| β(°)                                      | 90                                                              |
| γ(°)                                      | 120                                                             |
| V (Å <sup>3</sup> )                       | 3731.14(6)                                                      |
| Z                                         | 3                                                               |
| ρ <sub>calc</sub> (g cm <sup>-3</sup> )   | 0.812                                                           |
| μ (mm <sup>-1</sup> )                     | 0.849                                                           |
| F (000)                                   | 933.0                                                           |
| 2Θ range for data collection/°            | 6.752 to 147.228                                                |
| Index ranges                              | -18 ≤ h ≤ 15, -13 ≤ k ≤ 18, -23 ≤ l ≤ 17                        |
| Reflections collected                     | 12400                                                           |
| Independent reflections                   | 4868 [R <sub>int</sub> = 0.0206, R <sub>sigma</sub> = 0.0236]   |
| Goodness-of-fit on F <sup>2</sup>         | 1.075                                                           |
| Final R indexes [I>=2σ (I)] <sup>a</sup>  | R <sub>1</sub> = 0.0339, wR <sub>2</sub> = 0.0967               |
| Final R indexes [all data] <sup>b</sup>   | R <sub>1</sub> = 0.0354, wR <sub>2</sub> = 0.0991               |
| Largest diff. peak/hole/e Å <sup>-3</sup> | 0.21/-0.21                                                      |
| CCDC deposition number                    | 2163045                                                         |

$$^a R_1 = \sum ||F_o| - |F_c|| / \sum |F_o|, \quad ^b wR_2 = \{ \sum [w(F_o^2 - F_c^2)^2] / \sum w(F_o^2)^2 \}^{1/2}$$

**Table S2.** Comparisons of C<sub>2</sub>H<sub>2</sub> uptake and selectivities of C<sub>2</sub>H<sub>2</sub>/CO<sub>2</sub> and C<sub>2</sub>H<sub>2</sub>/C<sub>2</sub>H<sub>4</sub> for

NUM-14a and other MOFs

| MOFs                                   | C <sub>2</sub> H <sub>2</sub> uptake<br>mmol g <sup>-1</sup> | C <sub>2</sub> H <sub>2</sub> /CO <sub>2</sub> (50:50, v/v)<br>selectivity              | Ref.             |
|----------------------------------------|--------------------------------------------------------------|-----------------------------------------------------------------------------------------|------------------|
| CuI@UiO-66-(COOH) <sub>2</sub>         | 2.14                                                         | 185.00                                                                                  | [1]              |
| ATC-Cu                                 | 5.01                                                         | 53.60                                                                                   | [2]              |
| MOF-OH                                 | 3.04                                                         | 25.00                                                                                   | [3]              |
| IPM-101                                | 3.04                                                         | 12.3                                                                                    | [4]              |
| FJU-118a                               | 3.96                                                         | 7.80                                                                                    | [5]              |
| BUT-85                                 | 2.95                                                         | 6.10                                                                                    | [6]              |
| [Ca(dtztp) <sub>0.5</sub> ]            | 4.91                                                         | 1.70                                                                                    | [7]              |
| [Ni(tzba) <sub>0.5</sub> (F)(bpy)]     | 5.58                                                         | 2.20                                                                                    | [8]              |
| CAU-10H                                | 5.13                                                         | 2.50                                                                                    | [9]              |
| SNNU-5-Sc                              | 5.13                                                         | 2.66                                                                                    | [10]             |
| <b>NUM-14a</b>                         | <b>4.44</b>                                                  | <b>3.37</b>                                                                             | <b>This work</b> |
| MOFs                                   | C <sub>2</sub> H <sub>2</sub> uptake<br>mmol g <sup>-1</sup> | C <sub>2</sub> H <sub>2</sub> /C <sub>2</sub> H <sub>4</sub> (1:99, v/v)<br>selectivity | Ref.             |
| NUM-12a                                | 4.42                                                         | 1.13                                                                                    | [11]             |
| Zn(ad)(int)                            | -                                                            | 1.61                                                                                    | [12]             |
| ZJNU-14                                | 4.00                                                         | 1.59                                                                                    | [13]             |
| ZJNU-7                                 | 5.04                                                         | 1.77                                                                                    | [14]             |
| UiO-67-(NH <sub>2</sub> ) <sub>2</sub> | 5.90                                                         | 2.1                                                                                     | [15]             |
| <b>NUM-14a</b>                         | <b>4.44</b>                                                  | <b>1.63</b>                                                                             | <b>This work</b> |

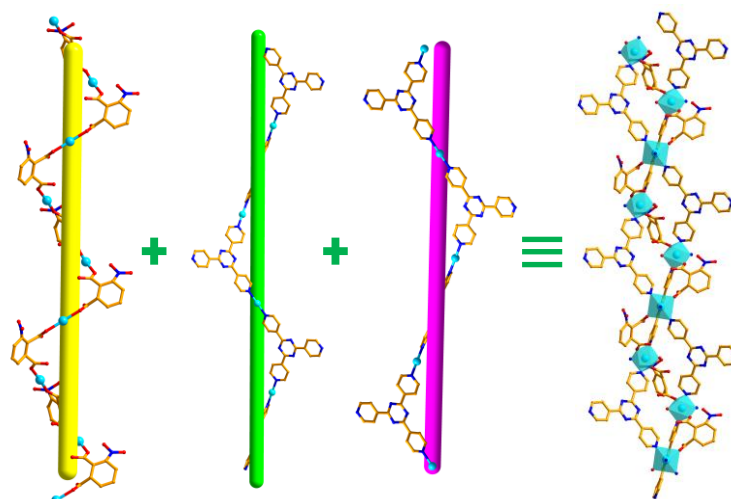

**Figure S1.** Three kinds of helix chains constitute the channel column of **NUM-14**.

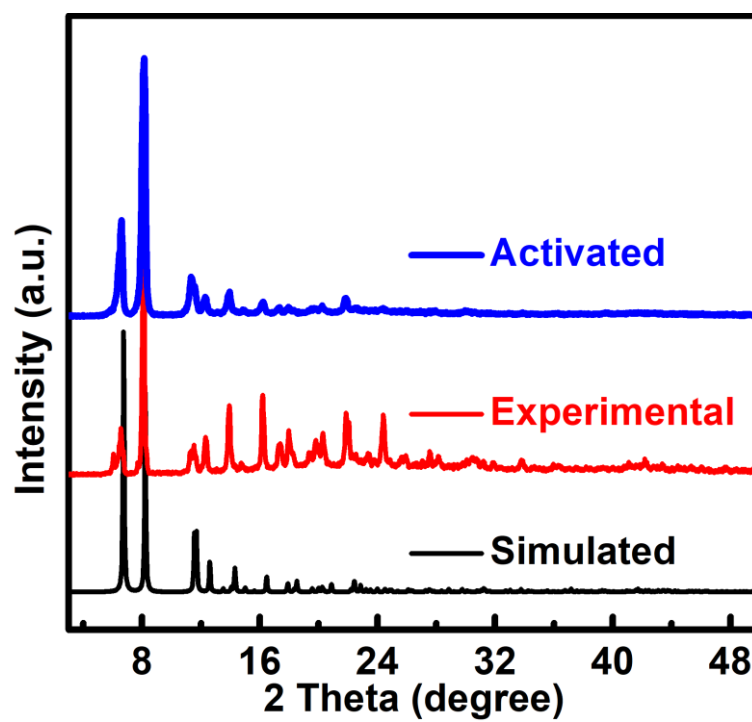

**Figure S2.** Comparison of simulated, experimental, and activated PXRD patterns of **NUM-14**.

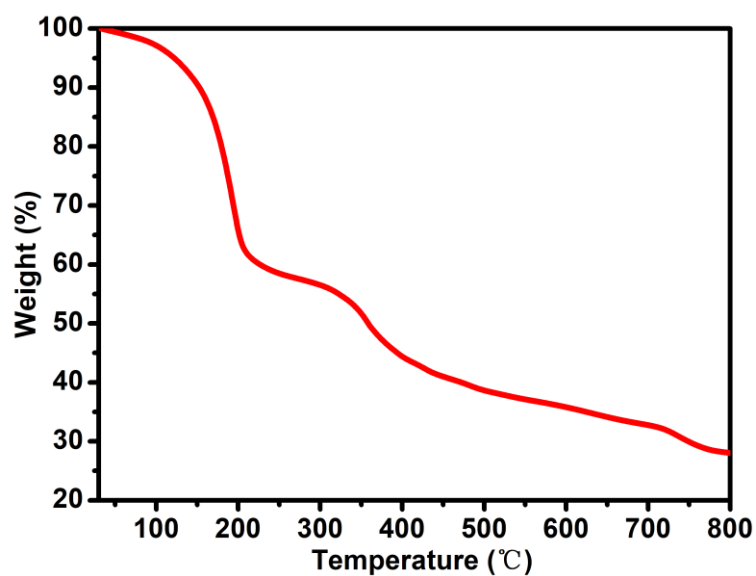

Figure S3. TGA curve for NUM-14 under Ar atmosphere.

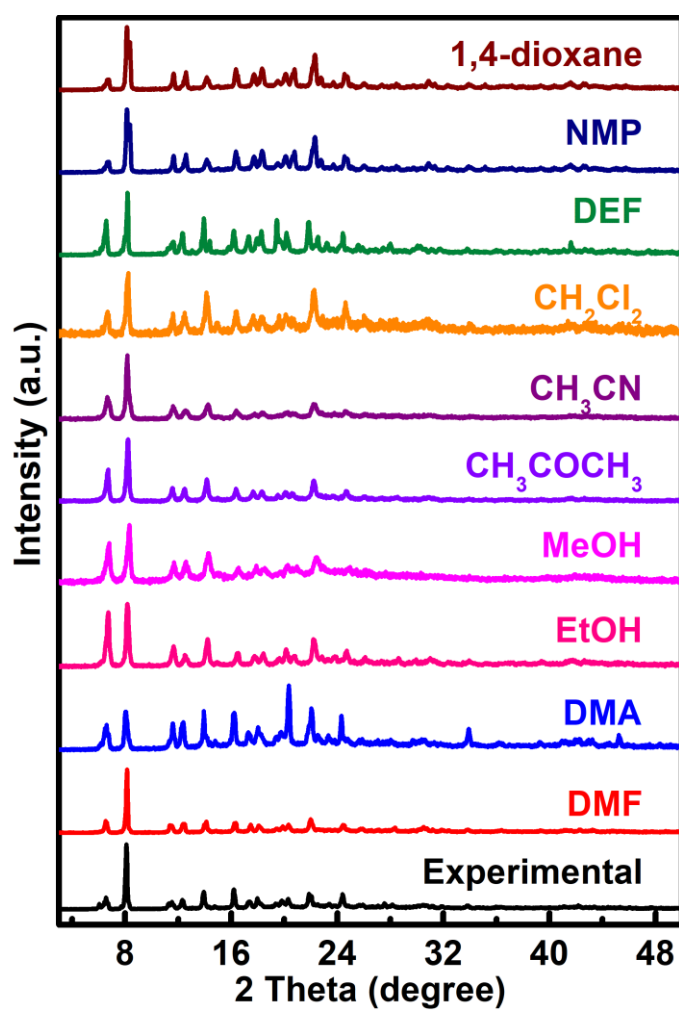

Figure S4. The PXRD patterns for NUM-14 after immersed in common solvents a week.

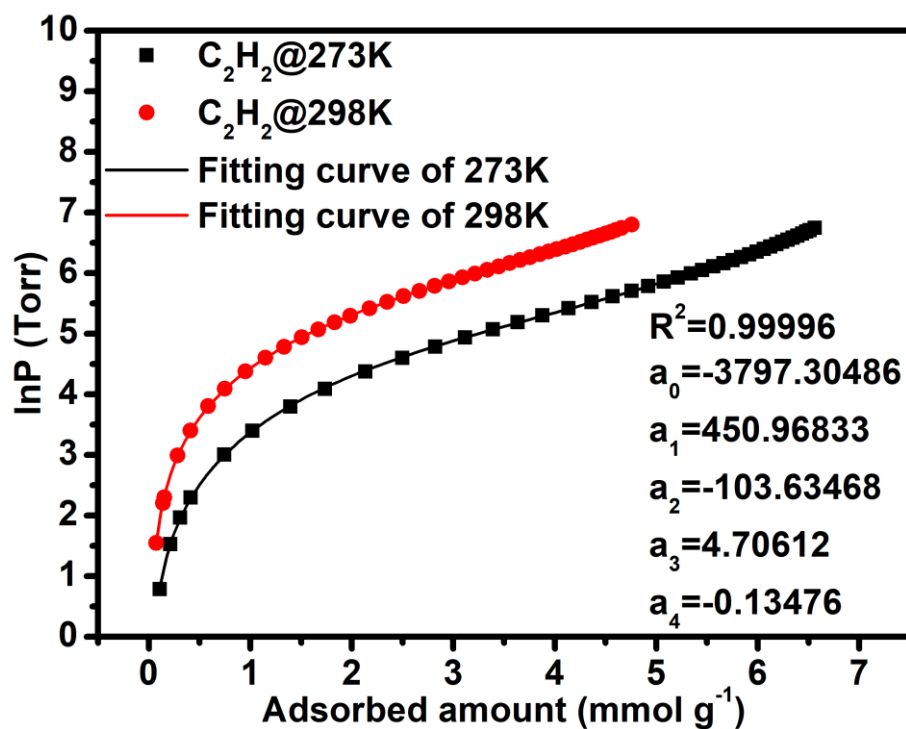

**Figure S5.** The details of Virial equation (solid lines) fitting to the experimental  $\text{C}_2\text{H}_2$  adsorption data (symbols) for NUM-14a.

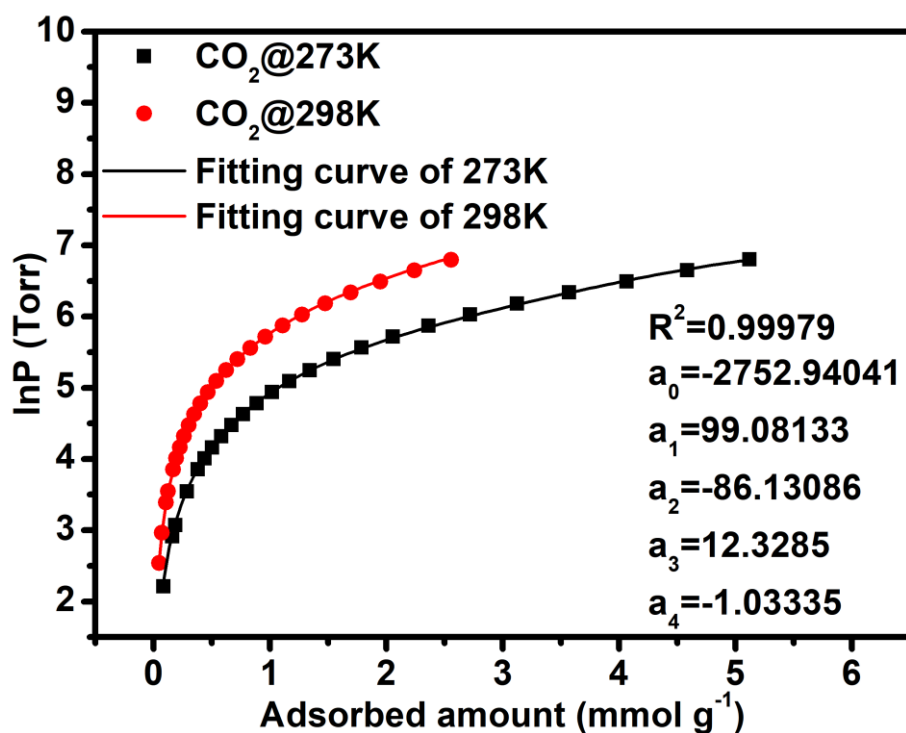

**Figure S6.** The details of Virial equation (solid lines) fitting to the experimental  $\text{CO}_2$  adsorption data (symbols) for NUM-14a.

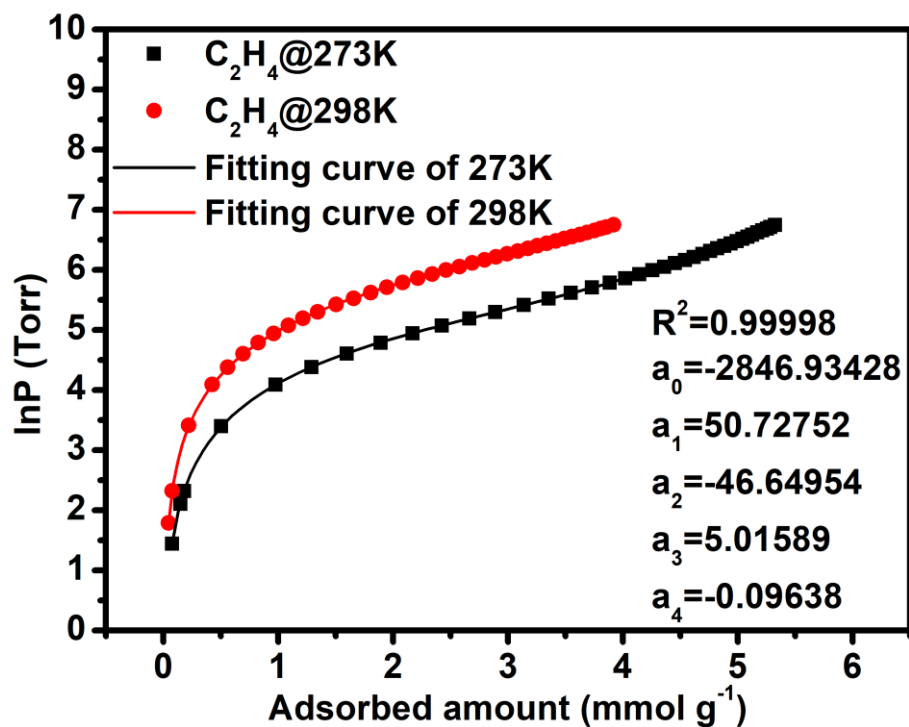

**Figure S7.** The details of Virial equation (solid lines) fitting to the experimental  $\text{C}_2\text{H}_4$  adsorption data (symbols) for NUM-14a.

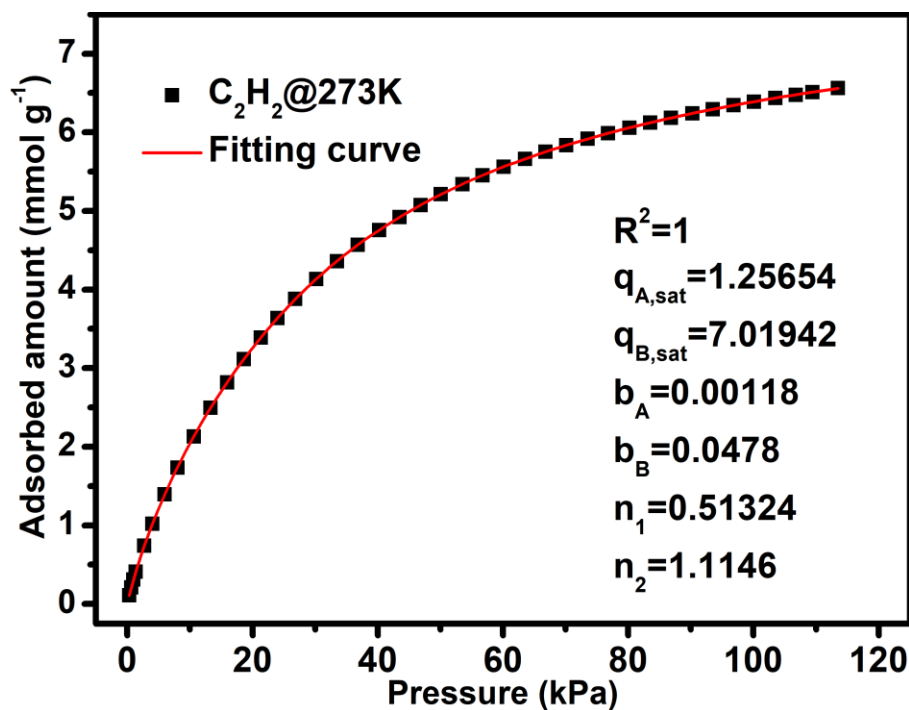

**Figure S8.** The details of dual-site Langmuir-Freundlich isotherm (solid lines) fitting to the experimental  $\text{C}_2\text{H}_2$  adsorption data (symbols) for NUM-14a at 273 K.

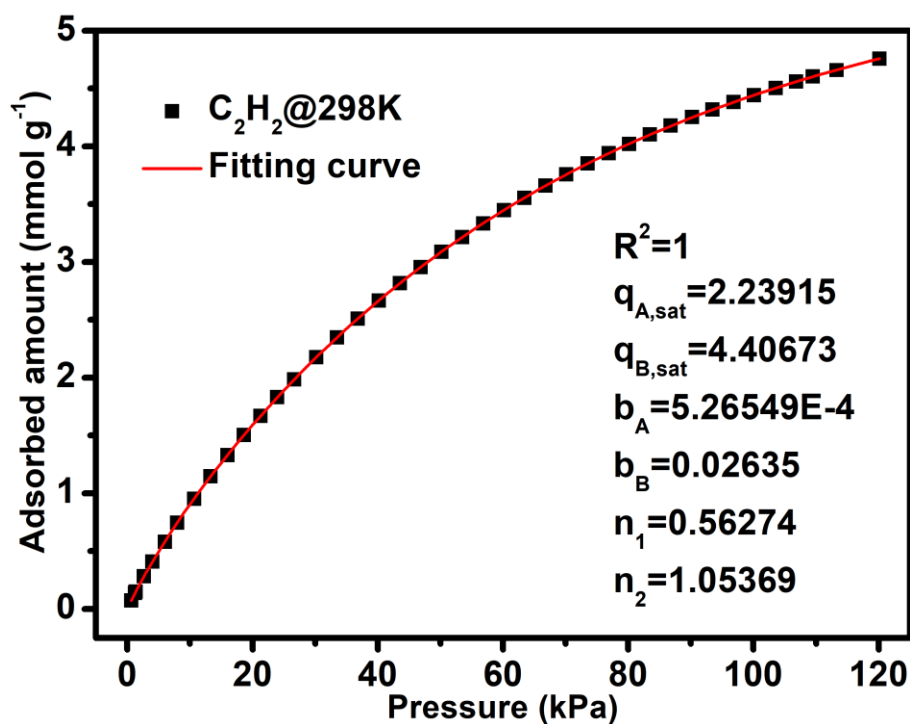

**Figure S9.** The details of dual-site Langmuir-Freundlich isotherm (solid lines) fitting to the experimental  $C_2H_2$  adsorption data (symbols) for NUM-14a at 298 K.

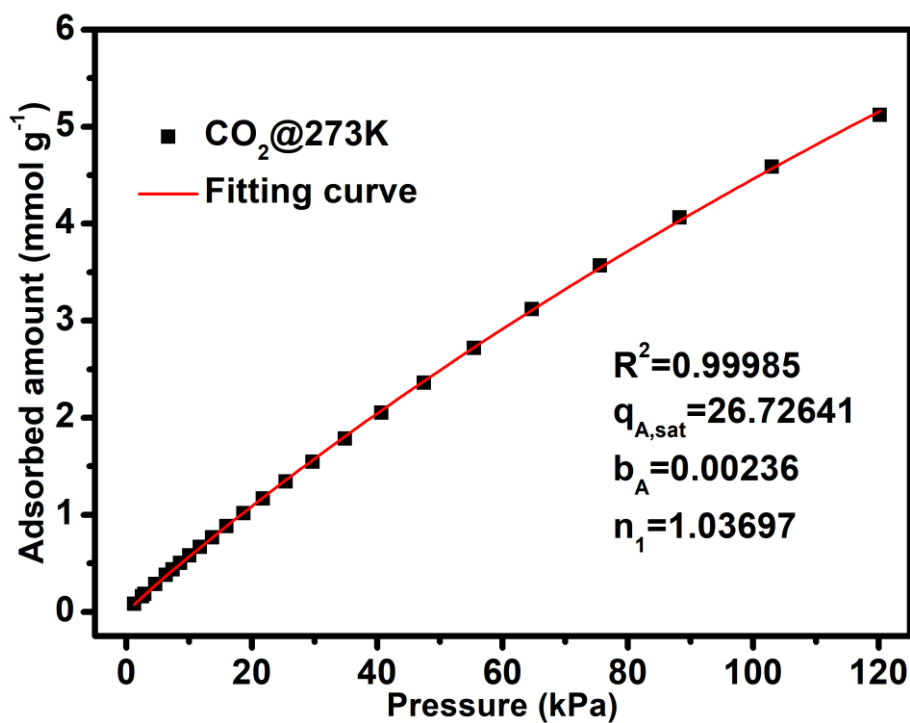

**Figure S10.** The details of single-site Langmuir-Freundlich isotherm (solid lines) fitting to the experimental  $CO_2$  adsorption data (symbols) for NUM-14a at 273 K.



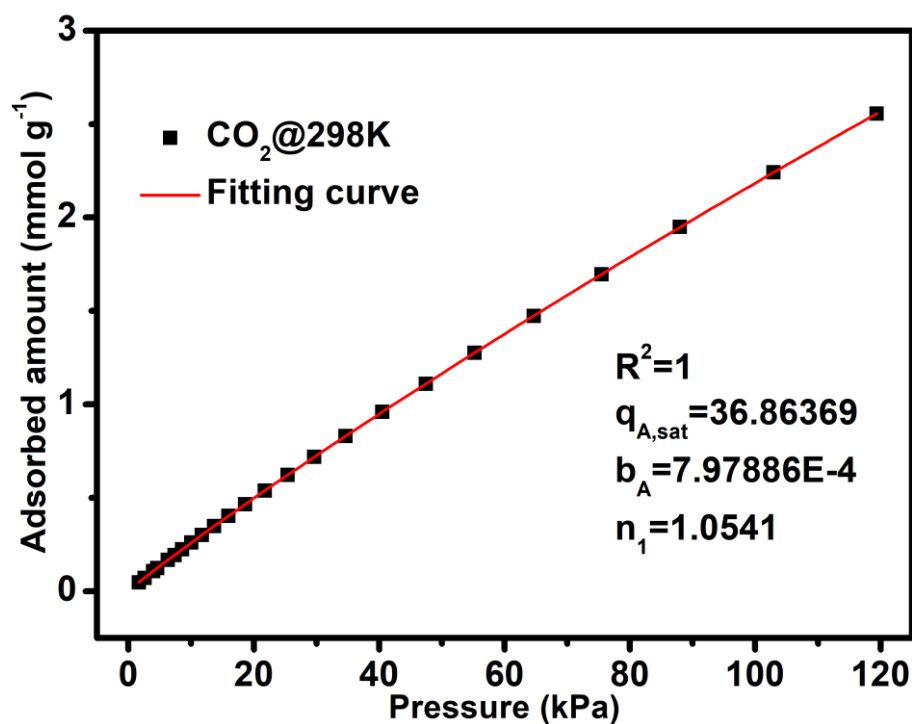

**Figure S11.** The details of single-site Langmuir-Freundlich isotherm (solid lines) fitting to the experimental CO<sub>2</sub> adsorption data (symbols) for NUM-14a at 298 K.

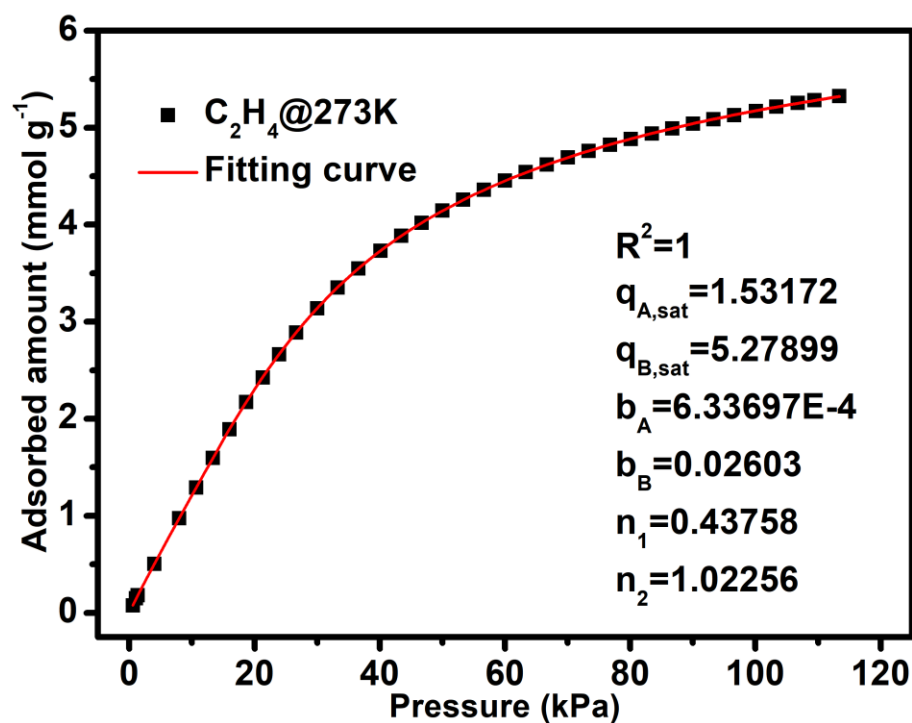

**Figure S12.** The details of dual-site Langmuir-Freundlich isotherm (solid lines) fitting to the experimental C<sub>2</sub>H<sub>4</sub> adsorption data (symbols) for NUM-14a at 273 K.

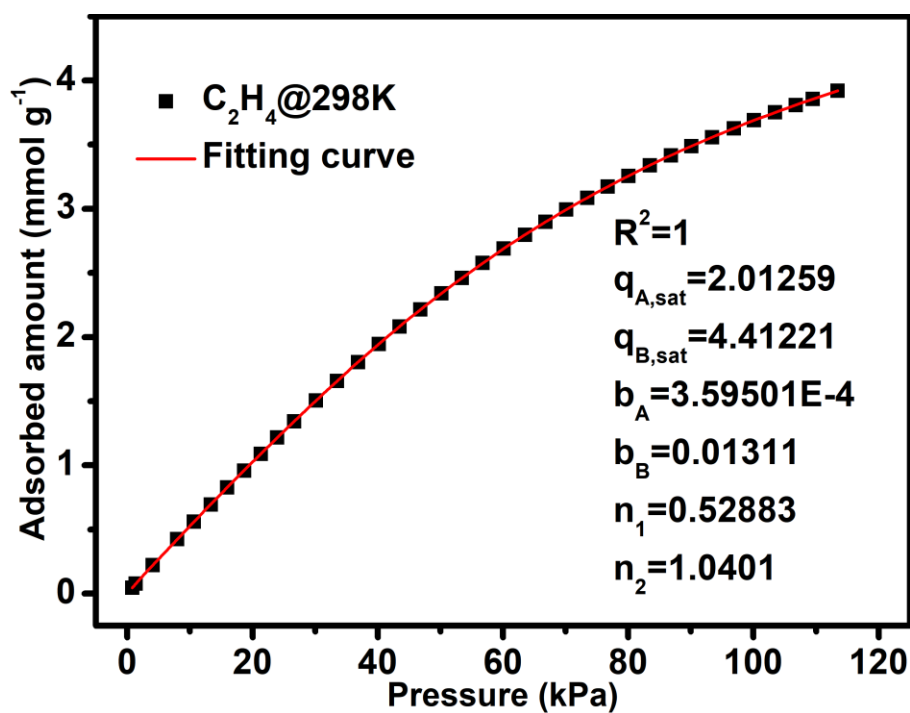

**Figure S13.** The details of dual-site Langmuir-Freundlich isotherm (solid lines) fitting to the experimental  $C_2H_4$  adsorption data (symbols) for **NUM-14a** at 298 K.

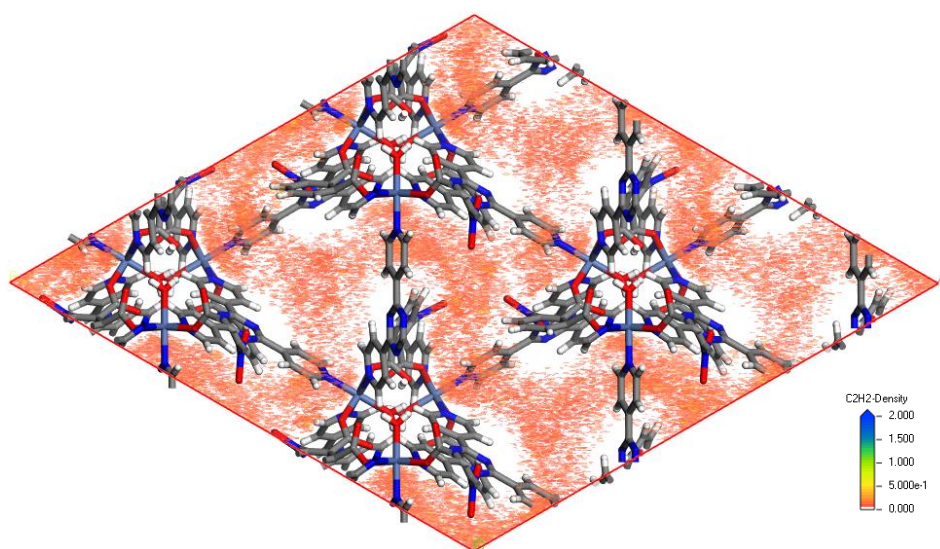

**Figure S14.** Density distribution of  $C_2H_2$  in **NUM-14a** at 298 K and 1 bar.

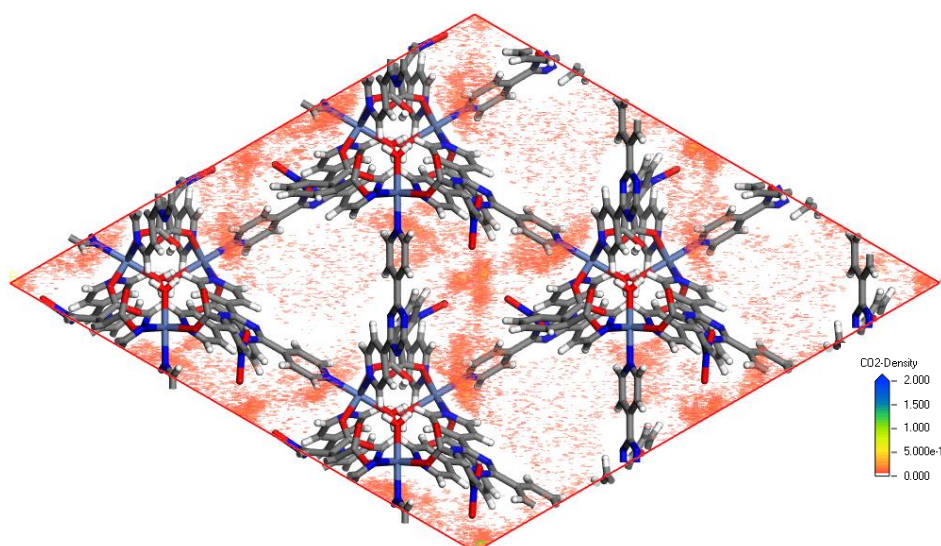

**Figure S15.** Density distribution of CO<sub>2</sub> in NUM-14a at 298 K and 1 bar.

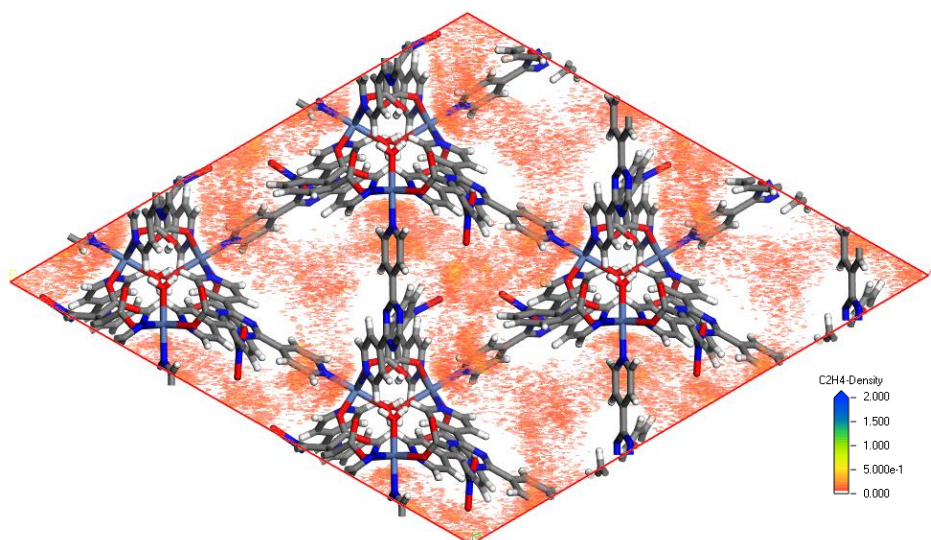

**Figure S16.** Density distribution of C<sub>2</sub>H<sub>4</sub> in NUM-14a at 298 K and 1 bar.

## References

1. Zhang, L.; Jiang, K.; Yang, L.; Li, L.; Hu, E.; Yang, L.; Shao, K.; Xing, H.; Cui, Y.; Yang, Y.; Li, B.; Chen, B.; Qian, G. Benchmark C<sub>2</sub>H<sub>2</sub>/CO<sub>2</sub> separation in an ultra-microporous metal-organic framework via copper(I)-alkynyl chemistry. *Angew. Chem. Int. Ed.* **2021**, *60*, 15995-16002.
2. Niu, Z.; Cui, X.; Pham, T.; Verma, G.; Lan, P. C.; Shan, C.; Xing, H.; Forrest, K. A.; Suepaul, S.; Space, B.; Nafady, A.; Al-Enizi, A. M.; Ma, S., A MOF-based ultra-strong acetylene nano-trap for highly efficient C<sub>2</sub>H<sub>2</sub>/CO<sub>2</sub> separation. *Angew. Chem. Int. Ed.* **2021**, *60*, 5283-5288.
3. Gong, W.; Cui, H.; Xie, Y.; Li, Y.; Tang, X.; Liu, Y.; Cui, Y.; Chen, B., Efficient C<sub>2</sub>H<sub>2</sub>/CO<sub>2</sub> separation in ultramicroporous metal-organic frameworks with record C<sub>2</sub>H<sub>2</sub> storage density. *J. Am. Chem. Soc.* **2021**, *143*, 14869-14876.
4. Sharma, S.; Mukherjee, S.; Desai, A. V.; Vandichel, M.; Dam, G. K.; Jadhav, A.; Kociok-Köhn, G.; Zaworotko, M. J.; Ghosh, S. K., Efficient capture of trace acetylene by an ultramicroporous metal-organic framework with purine binding sites. *Chem. Mater.* **2021**, *33*, 5800-5808.
5. Song, Q.; Yang, Y.; Yuan, F.; Zhu, S.; Wang, J.; Xiang, S.; Zhang, Z., Electrostatic force-driven lattice water bridging to stabilize a partially charged indium MOF for efficient separation of C<sub>2</sub>H<sub>2</sub>/CO<sub>2</sub> mixtures. *J. Mater. Chem. A* **2022**, *10*, 9363-9369.
6. Si, G.-R.; Wu, W.; He, T.; Xu, Z.-C.; Wang, K.; Li, J.-R., Stable Bimetallic Metal-organic framework with dual-functional pyrazolate-carboxylate ligand: Rational construction and C<sub>2</sub>H<sub>2</sub>/CO<sub>2</sub> separation. *ACS Materials Letters* **2022**, *4*, 1032-1036.
7. Wang, G.-D.; Li, Y.-Z.; Zhang, W.-F.; Hou, L.; Wang, Y.-Y.; Zhu, Z., Acetylene separation by a Ca-MOF containing accessible sites of open metal centers and organic groups. *ACS Appl. Mater. Interfaces* **2021**, *13*, 58862-58870.
8. Wang, G.-D.; Wang, H.-H.; Shi, W.-J.; Hou, L.; Wang, Y.-Y.; Zhu, Z., A highly stable MOF with F and N accessible sites for efficient capture and separation of acetylene from ternary mixtures. *J. Mater. Chem. A* **2021**, *9*, 24495-24502.
9. Ye, Y.; Xian, S.; Cui, H.; Tan, K.; Gong, L.; Liang, B.; Pham, T.; Pandey, H.; Krishna, R.; Lan, P. C.; Forrest, K. A.; Space, B.; Thonhauser, T.; Li, J.; Ma, S., Metal-organic framework based hydrogen-bonding nanotrap for efficient acetylene storage and separation. *J. Am. Chem. Soc.* **2022**, *144*, 1681-1689.
10. Lv, H.-J.; Zhang, J.-W.; Jiang, Y.-C.; Li, S.-N.; Hu, M.-C.; Zhai, Q.-G., Micropore regulation in ultrastable [Sc<sub>3</sub>O] organic frameworks for acetylene storage and purification. *Inorg. Chem.* **2022**, *61*, 3553-3562.
11. Zhang, Q.; Yang, S.-Q.; Zhou, L.; Yu, L.; Li, Z.-F.; Zhai, Y.-j.; Hu, T.-L., Pore-space partition through an embedding metal-carboxylate chain-induced topology upgrade strategy for the separation of acetylene/ethylene. *Inorg. Chem.* **2021**, *60*, 19328-19335.
12. Ding, Q.; Zhang, Z.; Liu, Y.; Chai, K.; Krishna, R.; Zhang, S. One-step ethylene purification from ternary mixtures in a metal-organic framework with customized pore chemistry and shape. *Angew. Chem. Int. Ed.* **2022**, DOI: 10.1002/anie.202208134.
13. Jiang, Z.; Fan, L.; Zhou, P.; Xu, T.; Chen, J.; Hu, S.; Chen, D.-L.; He, Y., An N-oxide-functionalized nanocage-based copper-tricarboxylate framework for the selective capture of C<sub>2</sub>H<sub>2</sub>. *Dalton Transactions* **2020**, *49*, 15672-15681.
14. Jiang, Z.; Fan, L.; Zhou, P.; Xu, T.; Hu, S.; Chen, J.; Chen, D.-L.; He, Y., An aromatic-rich cage-based MOF with inorganic chloride ions decorating the pore surface displaying the preferential adsorption of C<sub>2</sub>H<sub>2</sub> and C<sub>2</sub>H<sub>6</sub> over C<sub>2</sub>H<sub>4</sub>. *Inorg. Chem. Front.* **2021**, *8*, 1243-1252.

15. Gu, X.-W.; Wang, J.-X.; Wu, E.; Wu, H.; Zhou, W.; Qian, G.; Chen, B.; Li, B., Immobilization of lewis basic sites into a stable ethane-selective MOF enabling one-step separation of ethylene from a ternary mixture. *J. Am. Chem. Soc.* **2022**, *144*, 2614-2623.
