# Supplementary material for: Customizing Pore System in a Microporous Metal–Organic Framework for Efficient C2H2 Separation from CO2 and C2H4
Source: Molecules. 2022 Sep 12;27(18):5929. doi: 10.3390/molecules27185929 (PMC9502222; doi:10.3390/molecules27185929)
Supplement: Supplementary file 1 [file molecules-27-05929-s001.zip › NUM-14.cif]

data_NUM-14
_audit_creation_date               2022-08-08
_audit_creation_method
;
Olex2 1.5
(compiled 2021.08.20 svn.r13c46975 for OlexSys, GUI svn.r6405)
;
_shelx_SHELXL_version_number       '2018/3'
_audit_contact_author_address      ?
_audit_contact_author_email        ?
_audit_contact_author_name         ''
_audit_contact_author_phone        ?
_publ_contact_author_id_orcid      ?
_publ_section_references
;
Bourhis, L.J., Dolomanov, O.V., Gildea, R.J., Howard, J.A.K., Puschmann, H.
 (2015). Acta Cryst. A71, 59-75.

Dolomanov, O.V., Bourhis, L.J., Gildea, R.J, Howard, J.A.K. & Puschmann, H.
 (2009), J. Appl. Cryst. 42, 339-341.

Sheldrick, G.M. (2015). Acta Cryst. C71, 3-8.
;
_chemical_name_common              ?
_chemical_name_systematic          ?
_chemical_formula_moiety           'C26.129 H17.064 N7.021 Ni O7.043'
_chemical_formula_sum              'C26.13 H17.06 N7.02 Ni O7.04'
_chemical_formula_weight           600.77
_chemical_absolute_configuration   ?
_chemical_melting_point            ?
loop_
  _atom_type_symbol
  _atom_type_description
  _atom_type_scat_dispersion_real
  _atom_type_scat_dispersion_imag
  _atom_type_scat_source
 'C' 'C' 0.0181 0.0091 'International Tables Vol C Tables 4.2.6.8 and 6.1.1.4'
 'H' 'H' 0.0000 0.0000 'International Tables Vol C Tables 4.2.6.8 and 6.1.1.4'
 'N' 'N' 0.0311 0.0180 'International Tables Vol C Tables 4.2.6.8 and 6.1.1.4'
 'Ni' 'Ni' -3.0029 0.5091
 'International Tables Vol C Tables 4.2.6.8 and 6.1.1.4'
 'O' 'O' 0.0492 0.0322 'International Tables Vol C Tables 4.2.6.8 and 6.1.1.4'

_shelx_space_group_comment
;
The symmetry employed for this shelxl refinement is uniquely defined
by the following loop, which should always be used as a source of
symmetry information in preference to the above space-group names.
They are only intended as comments.
;
_space_group_crystal_system        'trigonal'
_space_group_IT_number             152
_space_group_name_H-M_alt          'P 31 2 1'
_space_group_name_Hall             'P 31 2"'
loop_
  _space_group_symop_operation_xyz
 'x, y, z'
 '-y, x-y, z+1/3'
 '-x+y, -x, z+2/3'
 'y, x, -z'
 'x-y, -y, -z+2/3'
 '-x, -x+y, -z+1/3'

_cell_length_a                     15.11740(10)
_cell_length_b                     15.11740(10)
_cell_length_c                     18.8520(2)
_cell_angle_alpha                  90
_cell_angle_beta                   90
_cell_angle_gamma                  120
_cell_volume                       3731.14(6)
_cell_formula_units_Z              3
_cell_measurement_reflns_used      7867
_cell_measurement_temperature      99.99(10)
_cell_measurement_theta_max        72.9830
_cell_measurement_theta_min        3.3790
_shelx_estimated_absorpt_T_max     0.850
_shelx_estimated_absorpt_T_min     0.786
_exptl_absorpt_coefficient_mu      0.842
_exptl_absorpt_correction_T_max    1.00000
_exptl_absorpt_correction_T_min    0.86177
_exptl_absorpt_correction_type     multi-scan
_exptl_absorpt_process_details
;
CrysAlisPro 1.171.39.33c (Rigaku Oxford Diffraction, 2017)
Empirical absorption correction using spherical harmonics,
 implemented in SCALE3 ABSPACK scaling algorithm.
;
_exptl_absorpt_special_details     ?
_exptl_crystal_colour              'light green'
_exptl_crystal_colour_modifier     light
_exptl_crystal_colour_primary      green
_exptl_crystal_density_diffrn      0.802
_exptl_crystal_density_meas        ?
_exptl_crystal_density_method      ?
_exptl_crystal_description         block
_exptl_crystal_F_000               922
_exptl_crystal_size_max            0.3
_exptl_crystal_size_mid            0.2
_exptl_crystal_size_min            0.2
_exptl_transmission_factor_max     ?
_exptl_transmission_factor_min     ?
_diffrn_reflns_av_R_equivalents    0.0206
_diffrn_reflns_av_unetI/netI       0.0236
_diffrn_reflns_Laue_measured_fraction_full  0.996
_diffrn_reflns_Laue_measured_fraction_max  0.982
_diffrn_reflns_limit_h_max         15
_diffrn_reflns_limit_h_min         -18
_diffrn_reflns_limit_k_max         18
_diffrn_reflns_limit_k_min         -13
_diffrn_reflns_limit_l_max         17
_diffrn_reflns_limit_l_min         -23
_diffrn_reflns_number              12383
_diffrn_reflns_point_group_measured_fraction_full  0.993
_diffrn_reflns_point_group_measured_fraction_max  0.966
_diffrn_reflns_theta_full          67.684
_diffrn_reflns_theta_max           73.614
_diffrn_reflns_theta_min           3.376
_diffrn_ambient_environment        N~2~
_diffrn_ambient_temperature        99.99(10)
_diffrn_detector                   'CCD plate'
_diffrn_detector_area_resol_mean   ?
_diffrn_measured_fraction_theta_full  0.996
_diffrn_measured_fraction_theta_max  0.982
_diffrn_measurement_details
;
List of Runs (angles in degrees, time in seconds):

  # Type    Start    End  Width  t~exp~   \w     \q     \k     \f   Frames
--------------------------------------------------------------------------
  1  \w     43.00  69.00   0.50    1.10    --    0.00  57.00  90.00   52
  2  \w    -89.00  13.00   0.50    1.10    --    0.00 -57.00  90.00  204
  3  \w     41.00  67.00   0.50    4.41    --   98.20 -77.00-180.00   52
  4  \w     66.00 168.00   0.50    4.41    --   98.20  45.00  90.00  204
  5  \w     58.00 188.00   0.50    4.41    --   98.20  45.00  60.00  260
  6  \w     81.00 106.00   0.50    4.41    --   98.20 -77.00-180.00   50
  7  \w     41.00 127.00   0.50    4.41    --   98.20 -82.00  90.00  172
;
_diffrn_measurement_device         'four-circle diffractometer'
_diffrn_measurement_device_type    'XtaLAB AFC12 (RINC): Kappa single'
_diffrn_measurement_method         '\w scans'
_diffrn_orient_matrix_type        
 'CrysAlisPro convention (1999,Acta A55,543-557)'
_diffrn_orient_matrix_UB_11        0.0979610000
_diffrn_orient_matrix_UB_12        0.0754260000
_diffrn_orient_matrix_UB_13        0.0399605000
_diffrn_orient_matrix_UB_21        0.0562531000
_diffrn_orient_matrix_UB_22        -0.0515134000
_diffrn_orient_matrix_UB_23        -0.0327133000
_diffrn_orient_matrix_UB_31        0.0327989000
_diffrn_orient_matrix_UB_32        0.0742117000
_diffrn_orient_matrix_UB_33        -0.0633752000
_diffrn_radiation_monochromator    mirror
_diffrn_radiation_probe            x-ray
_diffrn_radiation_type             'Cu K\a'
_diffrn_radiation_wavelength       1.54184
_diffrn_source                     'Rotating-anode X-ray tube (dual wavelength)'
_diffrn_source_type                'Rigaku (Cu) X-ray DW Source'
_reflns_Friedel_coverage           0.763
_reflns_Friedel_fraction_full      0.990
_reflns_Friedel_fraction_max       0.947
_reflns_number_gt                  4633
_reflns_number_total               4864
_reflns_special_details
;
 Reflections were merged by SHELXL according to the crystal
 class for the calculation of statistics and refinement.
 
 Structure factors included contributions from the .fab file.
 
 _reflns_Friedel_fraction is defined as the number of unique
 Friedel pairs measured divided by the number that would be
 possible theoretically, ignoring centric projections and
 systematic absences. Completness statistics refer to single and
 composite reflections containing twin component 1 only.
;
_reflns_threshold_expression       'I > 2\s(I)'
_computing_cell_refinement         'CrysAlisPro 1.171.39.33c (Rigaku OD, 2017)'
_computing_data_collection         'CrysAlisPro 1.171.39.33c (Rigaku OD, 2017)'
_computing_data_reduction          'CrysAlisPro 1.171.39.33c (Rigaku OD, 2017)'
_computing_molecular_graphics      'Olex2 1.5 (Dolomanov et al., 2009)'
_computing_publication_material    'Olex2 1.5 (Dolomanov et al., 2009)'
_computing_structure_refinement    'SHELXL 2018/3 (Sheldrick, 2015)'
_computing_structure_solution      'olex2.solve 1.5 (Bourhis et al., 2015)'
_refine_diff_density_max           0.244
_refine_diff_density_min           -0.222
_refine_diff_density_rms           0.037
_refine_ls_abs_structure_details
;
 Refined as an inversion twin.
;
_refine_ls_abs_structure_Flack     0.10(3)
_refine_ls_extinction_coef         .
_refine_ls_extinction_method       none
_refine_ls_goodness_of_fit_ref     1.062
_refine_ls_hydrogen_treatment      constr
_refine_ls_matrix_type             full
_refine_ls_number_parameters       231
_refine_ls_number_reflns           4864
_refine_ls_number_restraints       117
_refine_ls_R_factor_all            0.0363
_refine_ls_R_factor_gt             0.0349
_refine_ls_restrained_S_all        1.159
_refine_ls_shift/su_max            0.001
_refine_ls_shift/su_mean           0.000
_refine_ls_structure_factor_coef   Fsqd
_refine_ls_weighting_details      
 'w=1/[\s^2^(Fo^2^)+(0.0719P)^2^+0.1638P] where P=(Fo^2^+2Fc^2^)/3'
_refine_ls_weighting_scheme        calc
_refine_ls_wR_factor_gt            0.0995
_refine_ls_wR_factor_ref           0.1010
_refine_special_details
;
 Refined as a 2-component inversion twin.
;
_olex2_refinement_description
;
1. Twinned data refinement
 Scales: 0.90(3)
 0.10(3)
2. Fixed Uiso
 At 1.2 times of:
  All C(H) groups
 At 1.5 times of:
  All O(H,H) groups
3. Restrained distances
 N5-O5
 1.22 with sigma of 0.01
 O4-O5
 2.1 with sigma of 0.01
 N5-C13
 1.48 with sigma of 0.01
4. Uiso/Uaniso restraints and constraints
C11 \\sim C12 \\sim C13 \\sim C14 \\sim C15 \\sim C16 \\sim C17: within 2A with
sigma of 0.01 and sigma for terminal atoms of 0.02 within 2A
O2 \\sim O3: within 2A with sigma of 0.01 and sigma for terminal atoms of 0.02
within 2A
O4 \\sim O5 \\sim N5: within 2A with sigma of 0.01 and sigma for terminal atoms
of 0.02 within 2A
O1 \\sim O2 \\sim O3 \\sim O4 \\sim O5: within 2A with sigma of 0.01 and sigma
for terminal atoms of 0.02 within 2A
Uanis(N5) \\sim Ueq, Uanis(O5) \\sim Ueq, Uanis(O4) \\sim Ueq: with sigma of
0.01 and sigma for terminal atoms of 0.02
Uanis(O5) \\sim Ueq, Uanis(O4) \\sim Ueq: with sigma of 0.001 and sigma for
terminal atoms of 0.002
Uanis(O2) \\sim Ueq: with sigma of 0.001 and sigma for terminal atoms of 0.002
5. Rigid body (RIGU) restrains
 C12, C13, C14, C15, C16, C17
 with sigma for 1-2 distances of 0.001 and sigma for 1-3 distances of 0.002
6. Others
 Sof(O4)=Sof(O5)=Sof(N5)=Sof(C12)=Sof(C13)=Sof(C14)=Sof(H14)=Sof(C15)=Sof(H15)=
 Sof(C16)=Sof(H16)=Sof(C17)=FVAR(1)
 Fixed Sof: H1A(0.5) H1B(0.5)
7.a Aromatic/amide H refined with riding coordinates:
 C1(H1), C2(H2), C4(H4), C5(H5), C9(H9), C10(H10), C14(H14), C15(H15), C16(H16)
7.b X=CH2 refined with riding coordinates:
 O1(H1A,H1B)
;
_atom_sites_solution_hydrogens     geom
_atom_sites_solution_primary       iterative
_atom_sites_solution_secondary     ?
loop_
  _atom_site_label
  _atom_site_type_symbol
  _atom_site_fract_x
  _atom_site_fract_y
  _atom_site_fract_z
  _atom_site_U_iso_or_equiv
  _atom_site_adp_type
  _atom_site_occupancy
  _atom_site_site_symmetry_order
  _atom_site_calc_flag
  _atom_site_refinement_flags_posn
  _atom_site_refinement_flags_adp
  _atom_site_refinement_flags_occupancy
  _atom_site_disorder_assembly
  _atom_site_disorder_group
 Ni1 Ni 1.000000 0.16425(3) 0.666667 0.03968(16) Uani 1 2 d S T P . .
 O1 O 1.000000 0.02663(15) 0.666667 0.0564(7) Uani 1 2 d S T P . .
 H1A H 0.948938 -0.029664 0.690494 0.085 Uiso 0.5 1 calc R U P . .
 H1B H 1.051062 0.021398 0.642840 0.085 Uiso 0.5 1 calc R U P . .
 O2 O 1.1676(3) 0.1171(3) 0.5759(2) 0.1130(10) Uani 1 1 d . U . . .
 O3 O 1.13173(13) 0.23770(13) 0.60520(9) 0.0508(4) Uani 1 1 d . . . . .
 O4 O 1.3106(12) 0.4911(11) 0.6132(7) 0.204(5) Uani 0.511(4) 1 d D U P A -1
 O5 O 1.3555(9) 0.3783(8) 0.6532(6) 0.164(4) Uani 0.511(4) 1 d D U P A -1
 N1 N 0.90877(15) 0.11817(17) 0.57585(9) 0.0445(5) Uani 1 1 d . . . . .
 N2 N 0.75945(18) 0.000000 0.333333 0.0591(9) Uani 1 2 d S T P . .
 N3 N 0.63864(18) 0.0304(2) 0.39269(10) 0.0585(7) Uani 1 1 d . . . . .
 N4 N 0.30191(16) 0.000000 0.333333 0.0457(7) Uani 1 2 d S T P . .
 N5 N 1.3333(12) 0.4287(13) 0.6117(7) 0.188(5) Uani 0.511(4) 1 d D U P A -1
 C1 C 0.8251(2) 0.1255(3) 0.57220(13) 0.0606(8) Uani 1 1 d . . . . .
 H1 H 0.807476 0.151117 0.611188 0.073 Uiso 1 1 calc R U . . .
 C2 C 0.7624(2) 0.0964(3) 0.51242(12) 0.0637(9) Uani 1 1 d . . . . .
 H2 H 0.704145 0.102542 0.511303 0.076 Uiso 1 1 calc R U . . .
 C3 C 0.78923(19) 0.0583(2) 0.45503(11) 0.0504(6) Uani 1 1 d . . . . .
 C4 C 0.8749(2) 0.0488(2) 0.45922(13) 0.0582(7) Uani 1 1 d . . . . .
 H4 H 0.893631 0.022096 0.421446 0.070 Uiso 1 1 calc R U . . .
 C5 C 0.93250(19) 0.0796(2) 0.52027(13) 0.0519(6) Uani 1 1 d . . . . .
 H5 H 0.990485 0.073195 0.522854 0.062 Uiso 1 1 calc R U . . .
 C6 C 0.72499(19) 0.0264(3) 0.39017(12) 0.0558(7) Uani 1 1 d . . . . .
 C7 C 0.5832(2) 0.000000 0.333333 0.0534(9) Uani 1 2 d S T P . .
 C8 C 0.4856(2) 0.000000 0.333333 0.0541(10) Uani 1 2 d S T P . .
 C9 C 0.4218(2) -0.0329(3) 0.27420(11) 0.0589(8) Uani 1 1 d . . . . .
 H9 H 0.440233 -0.055072 0.233755 0.071 Uiso 1 1 calc R U . . .
 C10 C 0.33175(19) -0.0322(3) 0.27633(11) 0.0561(7) Uani 1 1 d . . . . .
 H10 H 0.289336 -0.054865 0.236773 0.067 Uiso 1 1 calc R U . . .
 C11 C 1.1849(3) 0.2078(3) 0.5767(2) 0.0858(11) Uani 1 1 d . U . . .
 C12 C 1.2605(6) 0.3034(6) 0.5167(4) 0.0820(18) Uani 0.511(4) 1 d . U P A -1
 C13 C 1.3214(9) 0.4091(7) 0.5355(6) 0.124(4) Uani 0.511(4) 1 d D U P A -1
 C14 C 1.3863(10) 0.4822(9) 0.4888(7) 0.145(4) Uani 0.511(4) 1 d . U P A -1
 H14 H 1.427181 0.548541 0.505349 0.174 Uiso 0.511(4) 1 calc R U P A -1
 C15 C 1.3935(9) 0.4639(8) 0.4235(6) 0.130(3) Uani 0.511(4) 1 d . U P A -1
 H15 H 1.437178 0.515366 0.392716 0.157 Uiso 0.511(4) 1 calc R U P A -1
 C16 C 1.3326(8) 0.3623(7) 0.4001(6) 0.115(3) Uani 0.511(4) 1 d . U P A -1
 H16 H 1.335456 0.347767 0.352522 0.138 Uiso 0.511(4) 1 calc R U P A -1
 C17 C 1.2685(6) 0.2828(5) 0.4448(4) 0.0774(17) Uani 0.511(4) 1 d . U P A -1

loop_
  _atom_site_aniso_label
  _atom_site_aniso_U_11
  _atom_site_aniso_U_22
  _atom_site_aniso_U_33
  _atom_site_aniso_U_23
  _atom_site_aniso_U_13
  _atom_site_aniso_U_12
 Ni1 0.0616(3) 0.03461(19) 0.0318(2) -0.01046(11) -0.0209(2) 0.03081(17)
 O1 0.0770(17) 0.0384(8) 0.0665(16) -0.0098(7) -0.0197(13) 0.0385(9)
 O2 0.130(2) 0.1188(19) 0.128(2) -0.0213(15) -0.0126(16) 0.0909(16)
 O3 0.0584(10) 0.0457(9) 0.0484(8) -0.0107(7) -0.0154(7) 0.0262(8)
 O4 0.202(6) 0.205(6) 0.203(6) 0.000(3) 0.002(3) 0.100(3)
 O5 0.162(4) 0.164(4) 0.162(4) -0.005(3) 0.002(3) 0.078(3)
 N1 0.0618(11) 0.0632(12) 0.0306(8) -0.0168(8) -0.0176(8) 0.0478(11)
 N2 0.0496(10) 0.116(3) 0.0339(13) -0.0299(15) -0.0149(8) 0.0579(14)
 N3 0.0529(11) 0.116(2) 0.0320(10) -0.0248(12) -0.0146(9) 0.0611(13)
 N4 0.0411(9) 0.087(2) 0.0243(11) 0.0047(12) 0.0023(6) 0.0435(11)
 N5 0.170(8) 0.185(9) 0.211(10) 0.015(8) 0.034(8) 0.090(7)
 C1 0.0740(17) 0.113(2) 0.0324(11) -0.0376(13) -0.0288(12) 0.0749(18)
 C2 0.0742(17) 0.127(3) 0.0314(11) -0.0284(14) -0.0211(11) 0.0813(19)
 C3 0.0523(12) 0.0852(18) 0.0326(10) -0.0239(11) -0.0145(9) 0.0485(14)
 C4 0.0534(14) 0.099(2) 0.0433(12) -0.0340(14) -0.0194(11) 0.0538(15)
 C5 0.0546(13) 0.0807(17) 0.0425(12) -0.0321(11) -0.0217(10) 0.0505(13)
 C6 0.0504(12) 0.108(2) 0.0334(11) -0.0293(13) -0.0155(9) 0.0584(15)
 C7 0.0472(12) 0.103(3) 0.0288(14) -0.0143(16) -0.0072(8) 0.0513(14)
 C8 0.0473(11) 0.112(3) 0.0247(13) -0.0151(16) -0.0075(8) 0.0560(16)
 C9 0.0484(13) 0.120(2) 0.0248(10) -0.0119(12) -0.0044(9) 0.0547(15)
 C10 0.0462(12) 0.112(2) 0.0250(10) -0.0061(12) -0.0043(9) 0.0502(15)
 C11 0.076(2) 0.091(2) 0.100(2) -0.058(2) -0.0296(19) 0.0492(19)
 C12 0.070(3) 0.072(3) 0.085(3) -0.005(3) 0.004(3) 0.021(3)
 C13 0.115(6) 0.083(4) 0.114(5) -0.024(4) 0.012(5) 0.003(4)
 C14 0.128(7) 0.085(5) 0.140(5) -0.011(4) 0.017(5) -0.009(5)
 C15 0.115(6) 0.079(4) 0.134(5) 0.009(4) 0.027(5) 0.000(4)
 C16 0.105(5) 0.078(4) 0.112(5) 0.011(3) 0.034(4) 0.007(4)
 C17 0.066(3) 0.064(3) 0.084(4) 0.003(3) 0.011(3) 0.019(3)

_geom_special_details
;
 All esds (except the esd in the dihedral angle between two l.s. planes)
 are estimated using the full covariance matrix.  The cell esds are taken
 into account individually in the estimation of esds in distances, angles
 and torsion angles; correlations between esds in cell parameters are only
 used when they are defined by crystal symmetry.  An approximate (isotropic)
 treatment of cell esds is used for estimating esds involving l.s. planes.
;
loop_
  _geom_bond_atom_site_label_1
  _geom_bond_atom_site_label_2
  _geom_bond_distance
  _geom_bond_site_symmetry_2
  _geom_bond_publ_flag
 Ni1 O1 2.081(2) . ?
 Ni1 O3 2.0809(19) . ?
 Ni1 O3 2.0809(19) 6_766 ?
 Ni1 N1 2.0875(16) . ?
 Ni1 N1 2.0876(16) 6_766 ?
 Ni1 N4 2.081(2) 2_655 ?
 O1 H1A 0.9300 . ?
 O1 H1B 0.9300 . ?
 O2 C11 1.261(5) . ?
 O3 C11 1.226(4) . ?
 O4 N5 1.155(15) . ?
 O5 N5 1.249(11) . ?
 N1 C1 1.325(3) . ?
 N1 C5 1.333(3) . ?
 N2 C6 1.337(3) 5 ?
 N2 C6 1.337(3) . ?
 N3 C6 1.337(3) . ?
 N3 C7 1.335(2) . ?
 N4 C10 1.347(3) 5 ?
 N4 C10 1.347(3) . ?
 N5 C13 1.459(11) . ?
 C1 H1 0.9300 . ?
 C1 C2 1.395(3) . ?
 C2 H2 0.9300 . ?
 C2 C3 1.379(3) . ?
 C3 C4 1.375(3) . ?
 C3 C6 1.484(3) . ?
 C4 H4 0.9300 . ?
 C4 C5 1.376(3) . ?
 C5 H5 0.9300 . ?
 C7 C8 1.476(4) . ?
 C8 C9 1.393(3) 5 ?
 C8 C9 1.393(3) . ?
 C9 H9 0.9300 . ?
 C9 C10 1.367(3) . ?
 C10 H10 0.9300 . ?
 C11 C12 1.737(9) . ?
 C12 C13 1.434(11) . ?
 C12 C17 1.410(11) . ?
 C13 C14 1.371(15) . ?
 C14 H14 0.9300 . ?
 C14 C15 1.278(15) . ?
 C15 H15 0.9300 . ?
 C15 C16 1.410(14) . ?
 C16 H16 0.9300 . ?
 C16 C17 1.388(11) . ?

loop_
  _geom_angle_atom_site_label_1
  _geom_angle_atom_site_label_2
  _geom_angle_atom_site_label_3
  _geom_angle
  _geom_angle_site_symmetry_1
  _geom_angle_site_symmetry_3
  _geom_angle_publ_flag
 O1 Ni1 O3 93.16(5) . 6_766 ?
 O1 Ni1 O3 93.16(5) . . ?
 O1 Ni1 N1 89.81(6) . . ?
 O1 Ni1 N1 89.81(6) . 6_766 ?
 O1 Ni1 N4 180.0 . 2_655 ?
 O3 Ni1 O3 173.68(10) 6_766 . ?
 O3 Ni1 N1 91.01(7) . . ?
 O3 Ni1 N1 91.01(7) 6_766 6_766 ?
 O3 Ni1 N1 89.01(7) 6_766 . ?
 O3 Ni1 N1 89.01(7) . 6_766 ?
 O3 Ni1 N4 86.84(5) 6_766 2_655 ?
 O3 Ni1 N4 86.84(5) . 2_655 ?
 N1 Ni1 N1 179.61(11) 6_766 . ?
 N4 Ni1 N1 90.19(6) 2_655 . ?
 N4 Ni1 N1 90.19(6) 2_655 6_766 ?
 Ni1 O1 H1A 120.0 . . ?
 Ni1 O1 H1B 120.0 . . ?
 H1A O1 H1B 120.0 . . ?
 C11 O3 Ni1 132.6(3) . . ?
 C1 N1 Ni1 120.90(14) . . ?
 C1 N1 C5 118.21(18) . . ?
 C5 N1 Ni1 120.89(14) . . ?
 C6 N2 C6 114.8(3) 5 . ?
 C7 N3 C6 114.4(2) . . ?
 C10 N4 Ni1 121.03(13) 5 3_664 ?
 C10 N4 Ni1 121.03(13) . 3_664 ?
 C10 N4 C10 117.9(3) . 5 ?
 O4 N5 O5 139.7(15) . . ?
 O4 N5 C13 97.7(13) . . ?
 O5 N5 C13 122.4(15) . . ?
 N1 C1 H1 118.6 . . ?
 N1 C1 C2 122.9(2) . . ?
 C2 C1 H1 118.6 . . ?
 C1 C2 H2 121.0 . . ?
 C3 C2 C1 118.0(2) . . ?
 C3 C2 H2 121.0 . . ?
 C2 C3 C6 120.0(2) . . ?
 C4 C3 C2 119.22(19) . . ?
 C4 C3 C6 120.75(19) . . ?
 C3 C4 H4 120.6 . . ?
 C3 C4 C5 118.9(2) . . ?
 C5 C4 H4 120.6 . . ?
 N1 C5 C4 122.8(2) . . ?
 N1 C5 H5 118.6 . . ?
 C4 C5 H5 118.6 . . ?
 N2 C6 N3 125.2(2) . . ?
 N2 C6 C3 117.89(19) . . ?
 N3 C6 C3 116.81(19) . . ?
 N3 C7 N3 125.8(3) 5 . ?
 N3 C7 C8 117.11(14) . . ?
 N3 C7 C8 117.11(14) 5 . ?
 C9 C8 C7 120.92(14) 5 . ?
 C9 C8 C7 120.92(14) . . ?
 C9 C8 C9 118.2(3) . 5 ?
 C8 C9 H9 120.4 . . ?
 C10 C9 C8 119.2(2) . . ?
 C10 C9 H9 120.4 . . ?
 N4 C10 C9 122.7(2) . . ?
 N4 C10 H10 118.6 . . ?
 C9 C10 H10 118.6 . . ?
 O2 C11 C12 126.1(4) . . ?
 O3 C11 O2 126.0(4) . . ?
 O3 C11 C12 105.0(4) . . ?
 C13 C12 C11 123.7(7) . . ?
 C17 C12 C11 122.4(6) . . ?
 C17 C12 C13 113.9(8) . . ?
 C12 C13 N5 114.5(11) . . ?
 C14 C13 N5 120.2(10) . . ?
 C14 C13 C12 122.9(10) . . ?
 C13 C14 H14 118.4 . . ?
 C15 C14 C13 123.2(10) . . ?
 C15 C14 H14 118.4 . . ?
 C14 C15 H15 121.4 . . ?
 C14 C15 C16 117.2(10) . . ?
 C16 C15 H15 121.4 . . ?
 C15 C16 H16 118.5 . . ?
 C17 C16 C15 123.1(10) . . ?
 C17 C16 H16 118.5 . . ?
 C16 C17 C12 119.5(7) . . ?

loop_
  _geom_torsion_atom_site_label_1
  _geom_torsion_atom_site_label_2
  _geom_torsion_atom_site_label_3
  _geom_torsion_atom_site_label_4
  _geom_torsion
  _geom_torsion_site_symmetry_1
  _geom_torsion_site_symmetry_2
  _geom_torsion_site_symmetry_3
  _geom_torsion_site_symmetry_4
  _geom_torsion_publ_flag
 Ni1 O3 C11 O2 3.3(6) . . . . ?
 Ni1 O3 C11 C12 164.9(3) . . . . ?
 Ni1 N1 C1 C2 179.5(3) . . . . ?
 Ni1 N1 C5 C4 -179.6(2) . . . . ?
 Ni1 N4 C10 C9 179.7(2) 3_664 . . . ?
 O2 C11 C12 C13 -145.8(9) . . . . ?
 O2 C11 C12 C17 33.0(11) . . . . ?
 O3 C11 C12 C13 52.5(10) . . . . ?
 O3 C11 C12 C17 -128.6(8) . . . . ?
 O4 N5 C13 C12 -129.6(15) . . . . ?
 O4 N5 C13 C14 68(2) . . . . ?
 O5 N5 C13 C12 47(2) . . . . ?
 O5 N5 C13 C14 -116.2(18) . . . . ?
 N1 C1 C2 C3 0.1(6) . . . . ?
 N3 C7 C8 C9 1.5(2) 5 . . . ?
 N3 C7 C8 C9 -178.5(2) . . . . ?
 N3 C7 C8 C9 -178.5(2) 5 . . 5 ?
 N3 C7 C8 C9 1.5(2) . . . 5 ?
 N5 C13 C14 C15 165.7(16) . . . . ?
 C1 N1 C5 C4 1.1(5) . . . . ?
 C1 C2 C3 C4 1.1(5) . . . . ?
 C1 C2 C3 C6 -179.9(3) . . . . ?
 C2 C3 C4 C5 -1.2(5) . . . . ?
 C2 C3 C6 N2 173.2(3) . . . . ?
 C2 C3 C6 N3 -4.3(5) . . . . ?
 C3 C4 C5 N1 0.1(5) . . . . ?
 C4 C3 C6 N2 -7.8(5) . . . . ?
 C4 C3 C6 N3 174.7(3) . . . . ?
 C5 N1 C1 C2 -1.2(5) . . . . ?
 C6 N2 C6 N3 -1.8(3) 5 . . . ?
 C6 N2 C6 C3 -179.1(4) 5 . . . ?
 C6 N3 C7 N3 -1.6(2) . . . 5 ?
 C6 N3 C7 C8 178.4(2) . . . . ?
 C6 C3 C4 C5 179.8(3) . . . . ?
 C7 N3 C6 N2 3.4(5) . . . . ?
 C7 N3 C6 C3 -179.3(2) . . . . ?
 C7 C8 C9 C10 179.7(2) . . . . ?
 C8 C9 C10 N4 0.6(5) . . . . ?
 C9 C8 C9 C10 -0.3(2) 5 . . . ?
 C10 N4 C10 C9 -0.3(2) 5 . . . ?
 C11 C12 C13 N5 12.8(17) . . . . ?
 C11 C12 C13 C14 175.0(12) . . . . ?
 C11 C12 C17 C16 -178.1(8) . . . . ?
 C12 C13 C14 C15 5(3) . . . . ?
 C13 C12 C17 C16 0.9(15) . . . . ?
 C13 C14 C15 C16 -1(3) . . . . ?
 C14 C15 C16 C17 -2(2) . . . . ?
 C15 C16 C17 C12 1.9(18) . . . . ?
 C17 C12 C13 N5 -166.2(12) . . . . ?
 C17 C12 C13 C14 -4.0(19) . . . . ?

_smtbx_masks_special_details       ?
loop_
  _smtbx_masks_void_nr
  _smtbx_masks_void_average_x
  _smtbx_masks_void_average_y
  _smtbx_masks_void_average_z
  _smtbx_masks_void_volume
  _smtbx_masks_void_count_electrons
  _smtbx_masks_void_content
 1 -0.883 -0.860 -0.356 2055.7 540.2 ?

_smtbx_masks_void_probe_radius     1.2
_smtbx_masks_void_truncation_radius  1.2
_shelx_res_file
;
TITL NUM-14_a.res in P3(1)21
    NUM-14.res
    created by SHELXL-2018/3 at 04:31:31 on 08-Aug-2022
REM Old TITL ni1_a.res in P3(1)21
REM SHELXT solution in P3(1)21: R1 0.219, Rweak 0.074, Alpha 0.015
REM <I/s> 0.910 for 15 systematic absences, Orientation as input
REM Flack x = 0.128 ( 0.010 ) from 1946 Parsons' quotients
REM Formula found by SHELXT: C26 N6 O3 Ni
CELL 1.54184 15.1174 15.1174 18.852 90 90 120
ZERR 3 0.0001 0.0001 0.0002 0 0 0
LATT -1
SYMM -Y,+X-Y,0.333+Z
SYMM +Y-X,-X,0.667+Z
SYMM +Y,+X,-Z
SYMM -Y+X,-Y,0.667-Z
SYMM -X,-X+Y,0.333-Z
SFAC C H N Ni O
UNIT 78.39 51.19 21.06 3 21.13
RIGU 0.001 0.002 C12 > C17
SIMU 0.01 0.02 2 C11 > C17
SIMU 0.01 0.02 2 O2 O3
SIMU 0.01 0.02 2 O4 O5 N5
SIMU 0.01 0.02 2 O1 > O5
ISOR 0.01 0.02 N5 O5 O4
ISOR 0.001 0.002 O5 O4
ISOR 0.001 0.002 O2
DFIX 1.22 0.01 N5 O5
DFIX 2.1 0.01 O4 O5
DFIX 1.48 0.01 N5 C13

L.S. 4 0 98
PLAN  19
SIZE 0.2 0.2 0.3
CONF
BOND
MORE -1
BOND $H
ABIN
fmap 2 53
acta
TWIN -1 0 0 0 -1 0 0 0 -1 2
OMIT 0 1 3
OMIT 0 4 0
OMIT 0 2 6
OMIT 0 4 2
OMIT 0 2 1
REM <olex2.extras>
REM <HklSrc "%.\\NUM-14.hkl">
REM </olex2.extras>

WGHT    0.071900    0.163800
BASF   0.09613
FVAR       0.62471   0.51073
NI1   4    1.000000    0.164251    0.666667    10.50000    0.06162    0.03461 =
         0.03180   -0.01046   -0.02091    0.03081
O1    5    1.000000    0.026626    0.666667    10.50000    0.07703    0.03842 =
         0.06652   -0.00984   -0.01969    0.03851
AFIX  93
H1A   2    0.948938   -0.029664    0.690494    10.50000   -1.50000
H1B   2    1.051062    0.021398    0.642840    10.50000   -1.50000
AFIX   0
O2    5    1.167648    0.117121    0.575938    11.00000    0.13020    0.11877 =
         0.12822   -0.02135   -0.01261    0.09088
O3    5    1.131726    0.237699    0.605201    11.00000    0.05839    0.04566 =
         0.04840   -0.01066   -0.01545    0.02616
PART -1
O4    5    1.310563    0.491108    0.613247    21.00000    0.20161    0.20504 =
         0.20334   -0.00002    0.00245    0.10011
O5    5    1.355536    0.378273    0.653155    21.00000    0.16244    0.16379 =
         0.16182   -0.00496    0.00228    0.07828
PART 0
N1    3    0.908772    0.118172    0.575849    11.00000    0.06183    0.06320 =
         0.03058   -0.01683   -0.01758    0.04780
N2    3    0.759447    0.000000    0.333333    10.50000    0.04963    0.11579 =
         0.03385   -0.02987   -0.01494    0.05790
N3    3    0.638643    0.030443    0.392694    11.00000    0.05286    0.11595 =
         0.03204   -0.02483   -0.01458    0.06114
N4    3    0.301909    0.000000    0.333333    10.50000    0.04110    0.08710 =
         0.02432    0.00470    0.00235    0.04355
PART -1
N5    3    1.333301    0.428656    0.611696    21.00000    0.17040    0.18480 =
         0.21126    0.01511    0.03396    0.08986
PART 0
C1    1    0.825118    0.125484    0.572199    11.00000    0.07400    0.11296 =
         0.03241   -0.03764   -0.02883    0.07493
AFIX  43
H1    2    0.807476    0.151117    0.611188    11.00000   -1.20000
AFIX   0
C2    1    0.762351    0.096407    0.512416    11.00000    0.07422    0.12701 =
         0.03137   -0.02842   -0.02113    0.08134
AFIX  43
H2    2    0.704145    0.102542    0.511303    11.00000   -1.20000
AFIX   0
C3    1    0.789232    0.058295    0.455025    11.00000    0.05233    0.08520 =
         0.03256   -0.02393   -0.01455    0.04852
C4    1    0.874907    0.048830    0.459216    11.00000    0.05337    0.09893 =
         0.04334   -0.03401   -0.01938    0.05382
AFIX  43
H4    2    0.893631    0.022096    0.421446    11.00000   -1.20000
AFIX   0
C5    1    0.932505    0.079601    0.520274    11.00000    0.05459    0.08073 =
         0.04253   -0.03208   -0.02169    0.05053
AFIX  43
H5    2    0.990485    0.073195    0.522854    11.00000   -1.20000
AFIX   0
C6    1    0.724987    0.026434    0.390165    11.00000    0.05037    0.10841 =
         0.03344   -0.02934   -0.01553    0.05841
C7    1    0.583193    0.000000    0.333333    10.50000    0.04715    0.10263 =
         0.02876   -0.01433   -0.00716    0.05132
C8    1    0.485584    0.000000    0.333333    10.50000    0.04725    0.11202 =
         0.02472   -0.01507   -0.00753    0.05601
C9    1    0.421792   -0.032894    0.274199    11.00000    0.04840    0.12027 =
         0.02479   -0.01188   -0.00444    0.05474
AFIX  43
H9    2    0.440233   -0.055072    0.233755    11.00000   -1.20000
AFIX   0
C10   1    0.331750   -0.032184    0.276328    11.00000    0.04619    0.11165 =
         0.02498   -0.00610   -0.00434    0.05025
AFIX  43
H10   2    0.289336   -0.054865    0.236773    11.00000   -1.20000
AFIX   0
C11   1    1.184918    0.207815    0.576668    11.00000    0.07648    0.09090 =
         0.09980   -0.05813   -0.02956    0.04923
PART -1
C12   1    1.260493    0.303357    0.516744    21.00000    0.06994    0.07158 =
         0.08523   -0.00505    0.00424    0.02089
C13   1    1.321368    0.409068    0.535507    21.00000    0.11479    0.08257 =
         0.11377   -0.02392    0.01217    0.00301
C14   1    1.386328    0.482236    0.488758    21.00000    0.12784    0.08480 =
         0.13970   -0.01070    0.01686   -0.00860
AFIX  43
H14   2    1.427181    0.548541    0.505349    21.00000   -1.20000
AFIX   0
C15   1    1.393535    0.463854    0.423508    21.00000    0.11468    0.07870 =
         0.13377    0.00861    0.02670    0.00021
AFIX  43
H15   2    1.437178    0.515366    0.392716    21.00000   -1.20000
AFIX   0
C16   1    1.332592    0.362263    0.400130    21.00000    0.10461    0.07778 =
         0.11208    0.01055    0.03433    0.00746
AFIX  43
H16   2    1.335456    0.347767    0.352522    21.00000   -1.20000
AFIX   0
C17   1    1.268510    0.282841    0.444811    21.00000    0.06642    0.06413 =
         0.08363    0.00278    0.01134    0.01922
HKLF 4


REM  NUM-14_a.res in P3(1)21
REM wR2 = 0.1010, GooF = S = 1.062, Restrained GooF = 1.159 for all data
REM R1 = 0.0349 for 4633 Fo > 4sig(Fo) and 0.0363 for all 4864 data
REM 231 parameters refined using 117 restraints

END

WGHT      0.0719      0.1637

REM Highest difference peak  0.244,  deepest hole -0.222,  1-sigma level  0.037
Q1    1   1.3030  0.5254  0.6038  11.00000  0.05    0.24
Q2    1   1.2322  0.1638  0.5625  11.00000  0.05    0.22
Q3    1   0.2542  0.0000  0.3333  10.50000  0.05    0.19
Q4    1   0.2886 -0.1244  0.3179  11.00000  0.05    0.17
Q5    1   1.0452  0.0278  0.5326  11.00000  0.05    0.15
Q6    1   1.0278  0.2372  0.7173  11.00000  0.05    0.14
Q7    1   0.3981 -0.0903  0.3528  11.00000  0.05    0.14
Q8    1   1.4154  0.4993  0.6454  11.00000  0.05    0.14
Q9    1   0.4280 -0.1265  0.3085  11.00000  0.05    0.14
Q10   1   0.2587 -0.1232  0.2549  11.00000  0.05    0.14
Q11   1   0.7289  0.0223  0.4878  11.00000  0.05    0.14
Q12   1   0.4782 -0.1009  0.3474  11.00000  0.05    0.13
Q13   1   0.4196  0.0000  0.3333  10.50000  0.05    0.13
Q14   1   1.0213  0.1602  0.5082  11.00000  0.05    0.13
Q15   1   1.2052  0.2700  0.3970  11.00000  0.05    0.12
Q16   1   1.4398  0.4398  0.5000  10.50000  0.05    0.11
Q17   1   0.9557  0.0880  0.4327  11.00000  0.05    0.10
Q18   1   0.4244 -0.1275  0.2451  11.00000  0.05    0.10
Q19   1   0.6668  0.1300  0.5468  11.00000  0.05    0.10
;
_shelx_res_checksum                50517
_shelx_hkl_file
;
   0   0   2    0.82    0.42
   0   0   3 4374.65  107.41
   0   0   4    2.47    0.75
   0   0   4    1.11    1.19
   0   0   5    0.16    1.25
   0   0   5    1.03    0.89
   0   0   6 2331.01   57.94
   0   0   6 2314.36   58.76
   0   0   7    1.30    1.43
   0   0   8    1.26    1.40
   0   0   9  654.86   19.10
   0   0  10    1.49    1.49
   0   0 -11    0.51    1.09
   0   0 -12 2028.59   51.05
   0   0 -13    0.16    1.39
   0   0 -14    0.18    1.52
   0   0 -15 1706.99   43.66
   0   0 -16    3.78    1.96
   0   0 -17    1.52    1.98
   0   0 -18 1220.93   31.93
   0   0 -19    0.18    1.83
   0   0 -20    1.96    1.80
   0   0 -21  482.54   13.19
   0   0 -22   -0.83    1.20
   0   0 -23   -0.17    0.74
  -1   1 -23    9.52    0.98
   1   0 -23    9.08    0.98
   1   0 -22    6.12    1.33
   0  -1 -22    3.88    1.12
  -1   1 -22    3.22    1.21
   1   0 -21   55.30    2.84
  -1   1 -21   56.47    2.79
   0  -1 -21   54.30    2.65
  -1   1 -20  308.08    9.23
   1   0 -20  310.48    9.32
   0  -1 -20  308.93    9.13
   1   0 -19   26.34    2.60
  -1   1 -19   25.32    2.46
   0  -1 -19   23.40    2.30
  -1   1 -18    1.48    2.01
   0  -1 -18    4.68    1.89
   1   0 -18    4.77    2.01
   0  -1 -17  229.41    7.60
  -1   1 -17  225.18    7.65
   1   0 -17  238.82    7.78
   0  -1 -16  598.27   16.66
  -1   1 -16  592.27   16.74
   1   0 -16  618.83   16.87
  -1   1 -15  304.12    9.31
   0  -1 -15  298.71    9.22
   1   0 -15  307.29    9.38
   1   0 -14  761.80   20.90
   0  -1 -14  787.88   20.85
  -1   1 -14  792.59   20.89
  -1   1 -13   35.96    2.42
   1   0 -13   42.66    2.53
   0  -1 -13   38.98    2.41
   1   0 -12  725.43   19.20
   0  -1 -12  715.66   19.13
  -1   1 -12  730.66   19.16
   1   0 -11  307.07    8.91
  -1   1 -11  313.92    8.92
   0  -1 -11  312.45    8.89
  -1   0  10  232.52    8.67
  -1   1 -10  231.49    6.73
   1  -1  10  212.21    8.65
  -1   0   9  894.49   25.43
   1  -1   9  960.95   25.84
  -1   0   9  910.89   24.57
  -1   0   8  247.72    8.47
   1  -1   8  239.75    8.60
  -1   0   8  254.31    7.94
   1  -1   7   59.82    3.41
  -1   0   7   58.83    3.20
  -1   0   7   55.98    2.74
   0   1   6    1.34    1.25
  -1   0   6    1.30    1.41
  -1   0   6    2.06    1.00
   1  -1   6    1.33    1.32
   1   0  -6    2.82    1.42
  -1   0   5  700.50   18.65
  -1   0   5  678.95   18.28
   1   0  -5  704.46   18.71
   1  -1   5  720.72   17.67
   0   1   5  656.95   18.68
   0  -1  -5  691.37   18.21
   1  -1   5  727.86   18.87
   1  -1   4    3.64    0.50
  -1   0   4    2.01    1.20
   1   0  -4    3.95    1.34
   0  -1  -4    5.71    0.98
   0   1   4    2.48    1.24
   1   0  -3  348.64    9.79
  -1   0   3  375.90    9.82
   0  -1  -3  349.99    9.88
   0   1   3  335.45    9.85
   0  -1  -3  368.96    9.67
   1  -1   3  371.96    9.10
  -1   0   2 2562.46   62.44
   1   0  -2 2563.28   62.46
   0  -1  -2 2447.96   62.50
   0   1   2 2544.52   62.52
  -1   0   1  420.53   10.79
   0  -1  -1  418.57   10.80
   1   0  -1  433.77   10.81
   0   1   1  434.26   10.81
   1  -1   0 5407.12  123.84
   1   0   0 5339.77  123.77
  -1   1   0 5241.26  123.85
  -1   1   2 1186.95   32.04
   1  -1  -2 1273.60   32.05
   0  -1   3  430.45   11.41
  -1   1   3  431.22   11.47
  -1   0  -4 3460.99   83.35
  -1   1   4 3195.51   83.89
   0  -1   4 3444.53   83.99
  -1   1   5 1851.47   46.09
   0  -1   5 1808.10   46.26
   1  -1  -6  769.94   21.80
   0  -1   6  809.27   20.96
  -1   1   6  850.94   21.46
   0  -1   6  820.34   21.76
   0  -1   7  315.30    9.71
   0  -1   7  320.52    8.81
   0  -1   8  165.21    5.35
   0  -1   8  152.64    6.17
  -1   1   8  158.46    6.27
   1   0   9 1303.68   36.76
   0  -1   9 1381.13   35.21
  -1   1   9 1436.97   36.86
   0  -1   9 1359.70   36.66
   0  -1  10    8.57    1.92
   1   0  10   11.43    2.17
  -1   1  10   14.76    2.23
  -1   0 -11  486.87   13.24
   1  -1 -11  490.71   13.24
  -1   0 -12  363.66   10.37
   1  -1 -12  368.30   10.41
  -1   0 -13  972.63   24.37
   1  -1 -13  943.74   24.37
  -1   0 -14   55.75    2.95
   0   1 -14   51.59    2.97
   1  -1 -14   52.83    2.96
   0   1 -15   45.42    2.91
  -1   0 -15   47.57    2.98
   1  -1 -15   49.70    3.02
  -1   0 -16  171.87    5.98
   0   1 -16  159.63    5.99
   1  -1 -16  157.97    5.93
   1  -1 -17  654.77   17.83
  -1   0 -17  645.70   17.74
   0   1 -17  629.29   17.83
  -1   0 -18   67.18    3.54
   1  -1 -18   66.25    3.62
   0   1 -18   71.37    3.82
   0   1 -19  507.86   14.39
   1  -1 -19  497.76   14.29
  -1   0 -19  520.25   14.30
   0   1 -20    1.09    1.81
   1  -1 -20    2.91    1.66
  -1   0 -20    2.41    1.72
   0   1 -21   79.73    3.41
  -1   0 -21   77.22    3.26
   1  -1 -21   80.08    3.35
  -1   0 -22   62.42    2.57
   1  -1 -22   64.66    2.63
   0   1 -22   60.18    2.68
  -1   0 -23    0.34    0.62
   0   1 -23   -0.74    0.82
   1  -1 -23   -0.16    0.65
   1  -2   0 1631.91   40.29
   1   1  -1 2725.59   67.50
   1  -2  -1 2803.77   67.81
   1  -2  -2  531.51   13.54
   1   1  -2  531.10   13.25
   1  -2  -3 1656.38   42.92
  -2   1   3 1680.84   42.82
   1  -2  -3 1705.05   42.91
  -2   1   3 1747.60   42.83
   1   1   3 1743.67   42.93
   1   1  -3 1713.91   42.60
   1  -2  -4 1064.28   26.97
  -2   1   4 1019.85   26.96
   1   1   4 1052.00   27.14
   1  -2  -4 1038.10   27.11
   1   1  -4 1064.55   26.87
  -2   1   4 1059.48   27.02
  -2   1   5 1312.83   33.43
  -2   1   5 1298.06   33.35
   1  -2  -5 1283.03   33.58
   1  -2   5 1325.69   33.49
   1  -2  -5 1285.27   33.29
   1   1  -5 1338.46   33.37
   1   1   5 1261.85   33.59
   1  -2   6  529.27   14.48
  -2   1   6  493.19   14.15
   1  -2  -6  534.98   14.16
   1  -2  -6  495.70   14.56
   1   1   6  505.17   14.55
  -2   1   6  500.07   14.34
   1  -2   7  167.79    4.77
  -2   1   7  150.30    5.63
  -2   1   7  158.32    5.91
   1  -2   7  158.79    5.96
   1   1   7  154.66    6.08
   1  -2  -7  145.54    5.97
   1  -2   8  486.04   14.34
  -2   1   8  484.03   14.24
   1  -2   8  476.66   12.68
   1   1   8  458.43   14.41
   1   1   9  452.51   14.25
  -2   1   9  451.99   13.38
  -2   1   9  444.93   13.83
   1  -2   9  437.11   13.86
   1   1 -10  308.32    8.80
   1  -2  10  311.93   10.92
  -2   1 -10  311.89    8.73
  -2   1  10  313.00   10.77
   1   1  10  310.88   11.15
   1   1 -11  390.33   11.05
  -2   1 -11  397.10   11.02
   1  -2 -11  405.70   11.01
   1  -2 -12   79.14    3.23
  -2   1 -12   68.75    3.12
  -2   1 -13  661.65   17.63
   1  -2 -13  649.18   17.62
  -2   1 -14  154.05    5.54
   1  -2 -14  158.00    5.55
   1  -2 -15   10.85    1.86
  -2   1 -15   10.79    1.91
   1  -2 -16    5.52    1.85
  -2   1 -16    3.59    1.79
  -2   1 -17    7.07    2.12
   1  -2 -17   10.05    2.05
  -2   1 -18   91.51    4.11
   1  -2 -18   83.04    3.93
  -2   1 -19  102.69    4.29
   1  -2 -19  114.44    4.48
   1   1 -19  103.58    4.68
  -2   1 -19  115.82    4.57
   1   1 -20   81.92    3.82
  -2   1 -20   81.75    3.57
   1  -2 -20   81.18    3.54
   1   1 -21   10.48    1.75
  -2   1 -21   11.78    1.63
   1  -2 -21   11.87    1.56
   1   1 -22   18.01    1.59
   1  -2 -22   17.83    1.39
  -2   1 -23   20.51    1.14
   1   1 -23   25.57    1.40
  -1   2   0 1618.68   39.96
  -1   2   1 2856.54   69.20
  -1  -1   1 2892.32   68.90
  -1  -1   2  512.80   13.01
  -1   2   2  516.20   13.30
   2  -1  -2  503.49   13.38
  -1  -1   3 1693.97   41.42
  -1   2   3 1623.26   41.65
   2  -1  -3 1659.23   41.75
   2  -1  -4  986.21   25.18
  -1   2   4  993.35   25.16
  -1  -1   4  942.98   24.86
  -1  -1   5 1347.74   33.89
   2  -1  -5 1328.42   34.15
  -1   2   5 1281.07   34.13
  -1  -1  -5 1340.48   33.54
  -1  -1   6  536.90   14.86
  -1   2   6  547.96   15.15
   2  -1  -6  522.78   15.10
  -1  -1  -6  538.02   14.35
  -1  -1  -7  193.60    5.90
  -1  -1   7  178.52    6.51
   2  -1   7  181.31    6.94
   2  -1  -7  194.71    6.85
  -1  -1   8  501.72   14.71
  -1  -1   8  508.53   14.07
   2  -1  -8  513.69   15.05
   2  -1   8  491.59   15.11
  -1   2   8  480.73   14.83
  -1  -1   9  444.59   13.55
  -1  -1   9  438.68   12.76
  -1   2 -10  299.78    8.63
  -1  -1  10  307.88    9.73
   2  -1  10  298.98   10.96
  -1  -1  10  321.96   10.66
  -1  -1 -11  386.99   10.72
  -1  -1 -12   71.35    3.06
   2  -1 -12   70.43    3.12
  -1  -1 -13  643.32   17.38
   2  -1 -13  653.04   17.51
  -1  -1 -14  151.17    5.29
   2  -1 -14  144.87    5.38
  -1  -1 -15    8.14    1.80
   2  -1 -15    6.65    1.93
  -1  -1 -16    4.04    1.90
   2  -1 -16    4.27    1.88
  -1  -1 -17   12.02    2.09
   2  -1 -17   14.51    2.36
   2  -1 -18   74.63    3.91
  -1  -1 -18   84.57    3.84
  -1   2 -18   79.46    4.02
  -1   2 -19  107.42    4.50
  -1  -1 -19  104.99    4.24
   2  -1 -19  103.36    4.48
   2  -1 -20   80.72    3.70
  -1  -1 -20   74.86    3.33
  -1   2 -20   77.15    3.65
   2  -1 -21    7.66    1.64
  -1   2 -21   10.42    1.70
  -1  -1 -21    8.70    1.41
  -1   2 -22   19.27    1.65
  -1  -1 -22   19.12    1.39
   2  -1 -22   21.34    1.65
  -1   2 -23   23.04    1.33
   2  -1 -23   21.65    1.23
   2   0 -23   39.28    1.72
  -2   2 -23   40.92    1.67
  -2   2 -22   -0.40    1.12
   2   0 -22    1.55    1.22
   0  -2 -22    0.62    0.96
   0  -2 -21   -0.39    1.15
  -2   2 -21    1.90    1.48
   2   0 -21   -1.33    1.54
  -2   2 -20  194.45    6.49
   0  -2 -20  200.02    6.32
   2   0 -20  200.80    6.61
   2   0 -19    4.89    2.22
  -2   2 -19    4.92    1.93
   0  -2 -19    5.84    1.70
   2   0 -18   51.73    3.34
  -2   2 -18   52.96    3.07
  -2   2 -18   54.88    3.28
   0  -2 -18   49.98    3.03
   0  -2 -17  471.84   13.44
   2   0 -17  460.61   13.75
  -2   2 -17  482.80   13.63
  -2   2 -16  584.11   15.97
   0  -2 -16  563.83   15.84
   2   0 -16  565.43   16.14
   2   0 -15  571.77   16.74
   0  -2 -15  630.77   16.68
  -2   2 -15  611.78   16.74
   0  -2 -14  797.44   21.25
  -2   2 -14  803.51   21.35
  -2   2 -13   17.24    1.93
   0  -2 -13   15.14    1.69
   0  -2 -12  240.38    7.17
  -2   2 -12  230.19    7.19
  -2   2 -11  697.00   19.41
   0  -2 -11  790.53   19.50
   2  -2  10   41.16    3.27
  -2   0  10   37.40    2.74
   2  -2   9   81.08    4.52
  -2   0   9   74.92    4.12
  -2   0   9   79.48    3.93
   0   2   9   81.94    4.44
  -2   0   8  770.36   21.41
   2   0  -8  786.51   21.68
   0   2   8  754.77   21.72
  -2   0   8  771.58   21.10
   2  -2   8  782.15   21.92
   2  -2   7  344.93   10.76
   0  -2  -7  330.78    9.96
  -2   0   7  336.96   10.36
  -2   0   7  339.59   10.17
   0   2   7  340.95   10.72
   2   0  -7  339.16   10.54
   0  -2  -6   16.46    1.64
   0   2   6   14.75    1.83
   2   0  -6   14.25    1.81
  -2   0   6   11.88    1.62
   0   2   5  638.33   17.54
   2   0  -5  640.38   17.39
   0  -2  -5  673.27   17.32
  -2   0   5  627.99   17.26
   0   2   4  127.25    4.56
   2   0  -4  131.48    4.47
  -2   0   4  129.71    4.36
   2   0  -3  794.74   19.84
  -2   0   3  787.42   19.73
   0   2   3  793.69   19.87
   0  -2  -2 8004.47  196.74
   2   0  -2 8047.05  196.76
  -2   0   2 8073.78  196.70
   0   2   2 8137.67  196.72
   2  -2   2 7937.85  196.31
   2  -2   1   27.79    1.24
   2   0  -1   28.72    1.37
  -2   0   1   29.19    1.28
   0   2   1   24.80    1.14
   0  -2  -1   26.27    1.22
   2  -2   0   67.06    2.31
  -2   2   0   61.71    2.24
   2   0   0   64.68    2.19
   2  -2   0   64.62    2.29
  -2   2   1 5940.67  141.32
   2  -2  -1 5652.00  141.21
  -2   2   1 5634.89  141.18
   2  -2  -1 5795.19  141.28
   0  -2   2    7.05    0.79
  -2   2   2    6.78    1.21
  -2   2   3 1471.72   40.28
   2  -2  -3 1653.66   40.49
  -2   2   3 1500.80   40.43
   0  -2   3 1752.85   40.07
  -2   2   4  450.33   11.92
   0  -2   4  404.79   11.43
   0  -2   5  478.65   13.25
  -2   0  -5  500.11   12.60
  -2   2   5  459.51   13.47
  -2   0  -6 1294.40   31.71
   2   0   6 1217.97   33.19
   0  -2   6 1237.86   32.67
   2   0   7  151.51    6.07
   0  -2   7  149.39    5.67
   2   0   8   47.79    3.42
   0  -2   8   53.99    3.25
   0  -2   8   55.35    2.56
   0  -2   9  149.97    5.04
   0  -2   9  147.84    6.04
   0  -2  10  462.51   14.67
   0   2 -10  470.78   12.70
  -2   0 -10  469.29   12.58
  -2   0 -11  222.39    6.50
   0   2 -11  203.24    6.51
  -2   0 -12    6.56    1.40
   0   2 -12    7.45    1.50
   2  -2 -12    7.20    1.47
  -2   0 -13  765.20   20.16
   2  -2 -13  765.88   20.22
   0   2 -13  747.51   20.28
  -2   0 -14    1.62    1.56
   0   2 -14    3.13    1.69
   2  -2 -14    1.71    1.58
   2  -2 -15    5.45    1.97
   0   2 -15    2.26    1.86
  -2   0 -15    6.00    1.67
  -2   0 -16  529.00   14.93
   2  -2 -16  537.25   15.07
  -2   0 -17  281.79    8.73
   2  -2 -17  269.77    8.77
  -2   0 -18  218.60    7.29
   2  -2 -18  227.09    7.42
  -2   0 -19  221.97    7.16
   2  -2 -19  221.62    7.31
   2  -2 -20   17.62    2.08
  -2   0 -20   20.11    1.95
   2  -2 -21   14.92    1.74
  -2   0 -21   13.54    1.55
  -2   0 -22   97.55    3.31
   0   2 -22   92.53    3.52
   2  -2 -22  104.31    3.42
   0   2 -23    6.14    0.93
   2   1 -23   25.51    1.38
  -3   2 -22    2.84    1.09
   1  -3 -21   24.96    1.68
  -3   2 -21   26.67    1.98
  -3   2 -20   32.96    2.25
   1  -3 -20   38.13    2.25
  -3   2 -20   34.60    2.34
  -3   2 -19   19.35    2.18
   1  -3 -19   18.39    1.95
  -3   2 -19   13.31    1.99
  -3   2 -18  173.29    6.13
   1  -3 -18  167.60    5.89
  -3   2 -17   33.89    2.67
   1  -3 -17   32.38    2.53
   1  -3 -16   14.04    1.96
  -3   2 -16   13.24    2.15
   2   1 -16   16.03    2.48
   1  -3 -15    5.40    1.67
  -3   2 -15    4.14    1.73
   2   1 -15    3.30    1.93
   1  -3 -14   77.27    3.47
   2   1 -14   74.24    3.74
  -3   2 -14   81.49    3.63
   2   1 -13  266.83    8.31
  -3   2 -13  272.80    8.19
   1  -3 -13  264.42    8.09
   2   1 -12  284.64    8.44
   1  -3 -12  278.93    8.26
  -3   2 -12  278.07    8.33
  -3   2 -11   87.09    3.42
   1  -3 -11   84.93    3.26
  -3   2 -10  391.21   10.82
  -3   1  10  401.59   12.76
   2  -3  10  390.03   13.11
  -3   1   9  445.59   14.05
  -3   1   9  456.11   14.02
   1   2   9  468.46   14.60
   2  -3   9  460.37   14.38
   2  -3   8 1165.98   31.88
  -3   1   8 1191.21   31.70
   1   2   8 1201.07   32.15
  -3   1   8 1182.59   31.59
  -3   1   7  220.66    7.32
   2  -3   7  193.24    5.45
   1  -3  -7  224.53    7.24
   1  -3  -7  224.18    7.59
   1   2   7  217.64    7.56
   2   1  -7  222.89    7.27
  -3   1   7  226.56    7.40
   2  -3   7  222.92    7.54
   2   1  -6 1379.86   35.41
   1   2   6 1336.66   35.66
   1  -3  -6 1361.29   35.74
   1  -3  -6 1430.32   35.56
  -3   1   6 1388.38   35.51
  -3   1   6 1312.34   35.49
  -3   1   5 1482.35   37.51
   1  -3  -5 1418.08   37.63
   2   1  -5 1446.56   37.33
   1   2   5 1465.13   37.66
   1  -3  -5 1508.36   37.70
   1   2   4 1184.06   30.11
  -3   1   4 1179.08   30.05
   1  -3  -4 1140.12   30.20
   1  -3  -4 1160.30   30.16
   2   1  -4 1180.78   29.83
  -3   1   3 1662.51   41.92
   1  -3  -3 1662.39   41.94
   1   2   3 1690.96   41.93
   2   1  -3 1651.31   41.68
  -3   1   2  713.15   18.03
   1  -3  -2  700.37   17.96
   1   2   2  699.59   17.84
  -3   2  -2  680.99   17.53
   2   1  -2  692.88   17.69
   1   2   1 2079.48   51.64
  -3   2  -1 2073.43   51.83
   2   1  -1 2104.04   51.66
  -3   1   1 2080.86   52.00
   2  -3   1 2111.33   51.88
   1  -3  -1 2101.41   51.82
   1   2   0 2735.42   67.39
  -3   2   0 2752.75   68.12
   2  -3   0 2771.97   67.97
   2   1   0 2755.30   67.72
   1  -3   0 2765.88   67.71
   1  -3   1  951.17   23.85
   2  -3  -1  980.20   24.32
  -3   2   1  944.34   24.48
  -3   2   2 1388.32   35.91
   2  -3  -2 1438.64   35.72
   2  -3  -3  889.96   25.27
   2  -3  -3 1063.84   25.34
   2  -3  -4 1158.08   29.99
   2  -3  -4 1157.98   29.98
  -3   2   4 1159.58   29.98
   2  -3  -5  555.56   14.53
   2  -3  -5  499.89   14.46
   2   1   5  517.70   14.65
   1  -3   5  510.12   14.13
  -3   2   5  515.23   14.54
  -3   2   5  496.12   14.32
   2  -3  -6 1583.81   40.53
  -3   2   6 1587.72   40.58
  -3   2   6 1595.10   40.68
   2   1   6 1528.57   40.77
   2  -3  -6 1550.93   40.71
   1  -3   6 1578.45   40.35
  -3   2   7  718.35   20.10
   1  -3   7  723.24   19.92
   2   1   7  713.13   20.35
   2  -3  -7  729.25   20.33
  -3   2   7  724.99   20.10
   2  -3  -8 1195.29   32.68
  -3   2   8 1184.79   32.27
   2   1   8 1231.83   32.86
   1  -3   8 1180.33   32.18
   1  -3   8 1225.13   30.77
  -3   2   8 1226.37   32.47
   2  -3  -9   91.94    4.93
   2   1   9   94.21    5.14
  -3   2   9   96.32    4.80
   1   2 -10  667.82   17.00
  -3   1 -10  643.72   16.89
   1   2 -11   33.22    2.12
  -3   1 -11   33.46    2.02
  -3   1 -12  283.48    8.26
   2  -3 -12  275.43    8.23
   1   2 -12  276.71    8.37
   1   2 -13  244.00    7.82
  -3   1 -13  246.48    7.67
   2  -3 -13  256.06    7.74
   2  -3 -14    8.13    1.75
  -3   1 -14    8.30    1.69
   1   2 -14    9.17    1.90
  -3   1 -15  199.54    6.66
   1   2 -15  193.73    6.79
   2  -3 -15  196.76    6.66
   1   2 -16  189.90    6.93
  -3   1 -16  203.97    6.76
   2  -3 -16  196.93    6.73
   2  -3 -17   20.33    2.25
  -3   1 -17   15.50    2.30
   1   2 -17   19.56    2.54
   1   2 -18    7.84    2.40
  -3   1 -18    5.53    1.98
   2  -3 -18    8.93    1.91
  -3   1 -19    6.80    1.78
   1   2 -19    5.54    2.22
   2  -3 -19    4.18    1.68
   1   2 -20   35.30    2.75
  -3   1 -20   37.76    2.44
  -3   1 -20   38.06    2.42
   2  -3 -20   38.23    2.35
   2  -3 -21   44.89    2.29
  -3   1 -21   48.12    2.48
  -3   1 -22   12.03    1.22
   2  -3 -22    8.82    0.99
   2  -4   0 2495.27   60.86
   2   2   0 2433.80   60.39
  -4   2   1 2792.14   69.82
   2  -4   1 2794.32   69.37
   2   2  -1 2817.81   68.97
   2  -4  -1 2802.95   69.60
  -4   2   2  455.97   12.31
   2  -4  -2  467.98   12.24
   2   2  -2  464.39   11.56
  -4   2   3 1565.16   38.81
   2   2  -3 1529.54   38.08
   2  -4  -3 1526.37   38.78
  -4   2  -3 1530.19   37.88
   2   2   3 1560.49   38.67
  -4   2   3 1410.67   38.89
   2   2   4  889.53   23.27
   2  -4  -4  890.38   23.36
  -4   2   4  893.58   23.24
   2  -4  -4  900.26   23.64
   2   2  -4  848.56   22.63
   2   2   5  293.66    9.10
  -4   2   5  285.79    8.89
   2   2  -5  293.53    8.51
  -4   2   5  274.40    9.08
   2  -4  -5  277.86    9.04
   2  -4  -5  302.69    9.27
   2  -4  -6 1459.34   37.96
  -4   2   6 1456.28   37.82
  -4   2   6 1416.75   37.97
   2  -4  -6 1432.49   37.99
   2   2   6 1502.77   38.07
   2  -4  -7 1458.77   38.09
   2  -4   7 1355.65   37.51
   2   2   7 1441.46   38.02
   2  -4  -7 1454.18   37.82
  -4   2   7 1437.80   37.95
  -4   2   7 1484.53   37.80
   2  -4   8  599.70   16.52
   2   2   8  602.37   16.92
   2  -4  -8  605.93   17.00
  -4   2   8  591.04   16.68
  -4   2   8  602.24   16.60
   2   2   9   87.66    4.81
  -4   2   9   74.29    4.31
  -4   2   9   78.37    4.29
   2  -4   9   80.62    4.35
  -4   2  -9   76.66    2.96
   2  -4  10    7.14    1.58
  -4   2 -10    5.88    1.18
   2  -4 -11   37.70    2.05
  -4   2 -11   38.03    2.24
   2   2 -11   36.48    2.21
   2   2 -12  183.27    6.09
  -4   2 -12  183.48    5.94
   2  -4 -12  183.09    5.86
   2  -4 -13   29.76    2.14
   2   2 -13   35.95    2.46
  -4   2 -13   29.78    2.29
   2   2 -14    4.92    1.94
   2  -4 -14    4.56    1.57
  -4   2 -15  232.25    7.72
   2  -4 -15  247.14    7.69
   2   2 -15  241.79    7.99
  -4   2 -16   14.40    2.11
   2  -4 -16   14.63    1.91
   2   2 -16   12.90    2.36
   2   2 -17    2.32    2.21
   2  -4 -17    2.95    1.70
  -4   2 -17    3.74    1.91
   2  -4 -18  107.45    4.38
  -4   2 -18  114.41    4.60
   2   2 -18  118.27    4.92
   2   2 -19   22.11    2.34
  -4   2 -19   19.77    2.31
  -4   2 -19   19.16    2.06
   2  -4 -19   18.46    1.83
  -4   2 -20   12.55    1.79
   2  -4 -20   12.86    1.51
  -4   2 -20   16.43    1.92
   2   2 -20   16.67    2.10
   2  -4 -21   33.62    1.75
  -4   2 -21   39.47    2.12
   2   2 -21   40.77    2.34
  -4   2 -21   38.63    2.10
  -4   2 -22    2.37    0.88
   2   2 -22    3.56    1.16
   3  -1 -23   24.73    1.30
  -2   3 -23   28.69    1.37
  -2   3 -22    4.79    1.24
   3  -1 -22    3.07    1.21
   3  -1 -21   25.85    2.14
  -2   3 -21   21.85    2.57
  -1  -2 -21   23.50    1.58
  -1  -2 -20   37.23    2.16
   3  -1 -20   36.55    2.59
  -1  -2 -19   13.03    1.70
   3  -1 -19   19.00    2.37
   3  -1 -18  166.62    6.00
  -2   3 -18  148.17    5.55
  -1  -2 -18  162.44    5.55
   3  -1 -17   25.81    2.76
  -2   3 -17   30.37    2.40
  -1  -2 -17   30.09    2.39
  -1  -2 -16   11.19    1.85
   3  -1 -16   12.72    2.30
  -2   3 -16    8.03    1.90
  -1  -2 -15    3.82    1.47
   3  -1 -15    5.10    1.99
   3  -1 -14   83.98    3.93
  -1  -2 -14   86.39    3.65
  -2   3 -13  238.50    7.74
  -1  -2 -13  263.65    7.70
  -1  -2 -12  284.38    8.27
  -2   3 -12  281.53    8.44
  -2   3 -11   80.99    3.29
  -1  -2 -11   79.66    3.10
  -2   3 -10  419.26   11.25
  -2  -1  10  402.67   12.64
  -2  -1  10  390.94   12.95
   3  -1  -9  471.66   14.34
   3  -2   9  431.02   14.32
  -1   3   9  436.76   14.03
  -2  -1   9  454.69   13.40
  -2  -1   9  432.21   13.55
  -1   3   8 1192.67   32.27
  -1  -2  -8 1254.29   31.40
   3  -1  -8 1199.00   32.37
   3  -2   8 1147.96   32.61
  -2  -1   8 1184.83   31.78
  -2  -1   7  220.01    7.61
  -1  -2  -7  244.09    7.55
   3  -1  -7  238.36    8.15
  -1   3   7  247.52    8.18
  -2  -1   6 1435.48   37.12
  -1   3   6 1436.99   37.55
   3  -1  -6 1460.36   37.61
  -1  -2  -6 1456.83   37.02
  -2  -1   5 1495.67   37.78
   3  -1  -5 1501.47   38.26
  -1   3   5 1461.35   38.12
  -1   3   4 1115.88   29.24
  -2  -1   4 1156.57   28.97
   3  -1  -4 1137.57   29.42
  -2  -1   3 1734.99   42.83
   3  -1  -3 1692.59   43.27
  -1   3   3 1715.73   43.14
  -2  -1   2  638.80   16.30
   3  -1  -2  645.69   16.81
  -1   3   2  642.75   16.56
  -1   3   1 2125.30   52.40
   3  -1  -1 2109.71   52.76
  -1   3   0 2684.62   64.25
  -2   3   0 2596.31   64.51
   3  -1   0 2484.26   64.68
  -2   3   1  964.71   24.43
  -1  -2   2 1399.52   35.05
  -2   3   2 1477.64   35.76
  -1  -2   3 1086.24   24.75
  -2   3   3 1062.58   25.39
   3  -2  -4 1048.27   27.79
  -1  -2   4 1097.47   27.16
  -2   3   4 1046.01   27.67
   3  -2  -5  509.42   14.20
  -1  -2   5  504.69   13.55
  -2   3   5  483.73   13.95
   3  -2  -6 1631.17   41.57
  -2   3   6 1566.27   41.34
  -1  -2   6 1614.60   40.93
   3  -2  -7  763.48   20.91
  -2   3   7  727.07   20.68
  -2  -1  -7  795.83   19.68
   3  -2  -8 1217.84   32.74
  -1  -2   8 1219.81   32.07
  -2  -1  -8 1255.87   31.05
  -2   3   9   90.58    4.78
   3  -2  -9   94.08    4.91
  -1  -2   9   94.97    4.04
  -1  -2   9   89.10    4.40
  -1   3 -10  655.97   17.20
  -1  -2  10  640.27   19.05
  -2  -1 -11   35.14    1.96
  -1   3 -11   31.37    2.03
  -1   3 -12  271.83    8.22
  -2  -1 -12  276.74    8.09
  -2  -1 -13  277.23    8.22
  -1   3 -13  269.87    8.35
   3  -2 -14    9.00    1.79
  -1   3 -14    8.18    1.90
  -1   3 -14    9.30    1.65
  -2  -1 -14    9.59    1.68
  -1   3 -15  189.21    6.32
  -2  -1 -15  197.50    6.41
   3  -2 -15  179.65    6.48
  -1   3 -15  182.72    6.47
  -2  -1 -16  177.26    6.20
  -1   3 -16  178.44    6.51
   3  -2 -16  188.76    6.52
  -2  -1 -17   14.88    2.08
  -1   3 -17   15.73    2.39
   3  -2 -17   14.60    2.26
   3  -2 -18    9.91    2.12
  -2  -1 -18    9.60    1.78
  -1   3 -18    7.70    2.34
   3  -2 -19    4.77    1.89
  -2  -1 -19    4.64    1.58
   3  -2 -20   33.39    2.53
  -2  -1 -20   36.62    2.22
  -2  -1 -21   44.77    2.18
   3  -2 -21   45.48    2.52
  -2  -1 -22    8.28    0.92
   3  -2 -22   10.24    1.33
   3   0 -23    8.47    0.89
  -3   3 -22   15.12    1.40
   3   0 -22   15.24    1.50
  -3   3 -21   16.77    1.79
   0  -3 -21   15.27    1.29
   3   0 -21   19.01    2.05
   3   0 -20   39.54    2.68
   0  -3 -20   36.17    2.09
  -3   3 -19   31.40    2.47
   0  -3 -19   27.90    2.06
  -3   3 -19   27.10    2.25
   0  -3 -18    4.26    1.53
  -3   3 -18    5.08    2.04
  -3   3 -18    5.63    1.91
  -3   3 -17  183.05    6.63
   0  -3 -17  199.33    6.46
  -3   3 -17  194.87    6.82
   0  -3 -16  442.95   12.09
  -3   3 -16  391.23   12.17
   0  -3 -15  538.00   14.86
   0  -3 -14  658.42   17.74
   0  -3 -13   66.94    3.04
   0  -3 -12   29.76    1.88
   0  -3 -11  110.05    3.87
  -3   0  10  767.01   21.47
  -3   0  10  720.02   21.43
  -3   0   9  901.32   25.11
   3   0  -9  904.70   25.55
   0  -3  -9  943.29   24.83
   0   3   9  912.12   25.70
   3  -3   9  903.88   25.88
  -3   0   9  881.82   25.11
   0   3   8  719.59   20.80
   3   0  -8  741.66   20.74
   0  -3  -8  751.83   20.28
   3  -3   8  720.57   21.03
  -3   0   8  722.66   20.44
  -3   0   8  718.45   20.39
   3   0  -7 1083.04   29.57
   0   3   7 1108.49   29.76
  -3   0   7 1105.60   29.36
   0  -3  -7 1138.21   29.49
   3   0  -6    8.28    1.56
   0   3   6   10.44    1.62
   0  -3  -6    8.86    1.50
  -3   0   6    7.28    1.45
   3   0  -5  660.62   18.30
  -3   0   5  689.73   18.16
   0   3   5  676.67   18.35
   0   3   4  176.30    5.73
   3   0  -4  169.32    5.72
  -3   0   4  183.86    5.68
   3   0  -3  967.62   25.39
  -3   0   3  980.81   25.26
   0   3   3  979.73   25.29
   3  -3   3 1003.30   24.62
   0  -3  -2 3782.67   93.60
   0   3   2 3844.98   93.55
   3   0  -2 3788.61   93.81
   3  -3   2 3817.00   93.42
  -3   0   2 3731.98   93.68
   3  -3   1  775.37   19.47
   0  -3  -1  758.12   19.14
   0   3   1  747.06   19.07
  -3   0   1  774.98   19.41
   3  -3   1  768.57   19.68
   3   0  -1  750.43   19.49
   3  -3   0 1795.83   47.52
   3   0   0 1952.49   47.43
   3  -3   0 1914.37   47.60
   0  -3   0 1914.01   46.73
   3  -3  -1 6288.22  152.43
   3  -3  -1 6233.36  152.40
  -3   3   1 6063.66  152.26
   3  -3  -2 9999.00  238.79
  -3   3   2 9844.56  238.60
   3  -3  -2 9698.01  238.73
   0  -3   2 9609.05  237.73
   3  -3  -3 2190.37   53.66
   0  -3   3 2126.10   52.78
  -3   3   3 2091.81   53.48
   3  -3  -4  579.95   16.59
  -3   3   4  635.67   16.54
   0  -3   4  607.03   15.86
   0  -3   5 2954.12   69.99
  -3   3   5 2922.79   70.58
   0  -3   6 1006.07   27.28
  -3   3   6  939.68   27.63
  -3   0  -7 3728.33   92.99
   3   0   7 3905.55   95.42
   0  -3   7 3799.45   94.32
   3   0   8  552.00   17.10
   0  -3   8  577.18   16.31
   0  -3   9   -0.29    1.12
   3   0   9   -0.20    1.59
  -3   0 -10   12.50    1.25
   0   3 -10    9.47    1.35
   0  -3  10   11.99    1.92
   0   3 -11  208.50    6.47
  -3   0 -11  204.89    6.29
   0   3 -12  236.04    7.30
  -3   0 -12  233.96    7.14
  -3   0 -13   50.37    2.71
   0   3 -13   53.55    2.86
  -3   0 -14  165.91    5.64
   3  -3 -14  159.24    5.69
   0   3 -14  159.75    5.74
   0   3 -15   15.41    2.23
  -3   0 -15   15.50    1.98
   3  -3 -15   15.80    2.15
   0   3 -16  447.39   13.23
   3  -3 -16  442.86   13.16
  -3   0 -16  472.26   13.02
   0   3 -17   74.82    3.95
   3  -3 -17   69.04    3.66
  -3   0 -17   72.01    3.55
   3  -3 -18  371.87   11.14
   0   3 -18  368.58   11.26
  -3   0 -18  391.24   11.03
   3  -3 -19  152.05    5.56
   0   3 -19  155.99    5.71
  -3   0 -19  155.77    5.37
   3  -3 -20   54.08    2.86
  -3   0 -20   54.48    2.70
   0   3 -20   57.12    2.98
   0   3 -21   15.32    1.86
   3  -3 -21   15.23    1.61
  -3   0 -21   14.16    1.47
   3  -3 -22   29.63    1.56
  -3   0 -22   26.46    1.41
   0   3 -23   53.38    1.97
   3   1 -22   28.87    1.84
  -4   3 -22   31.89    1.68
   3   1 -21   22.24    2.04
  -4   3 -21   24.25    1.82
   3   1 -20    5.33    1.91
  -4   3 -20    7.31    1.66
  -4   3 -20    5.28    1.58
   1  -4 -20    5.94    1.15
   1  -4 -19   12.35    1.55
  -4   3 -19   16.27    2.12
  -4   3 -19   15.78    2.14
   3   1 -19   13.37    2.40
  -4   3 -18  170.26    6.22
   3   1 -18  167.96    6.27
  -4   3 -18  179.41    6.00
  -4   3 -17   30.72    2.64
   3   1 -17   33.10    2.90
   1  -4 -16    5.60    1.53
  -4   3 -16    4.63    2.05
   3   1 -16    5.35    2.16
  -4   3 -15   21.12    2.43
   3   1 -15   22.31    2.55
   1  -4 -15   20.90    2.00
  -4   3 -14   16.34    2.08
   3   1 -14   18.36    2.21
   1  -4 -14   19.73    1.83
   1  -4 -13   31.53    2.09
   3   1 -13   30.67    2.44
  -4   3 -13   30.95    2.33
   1  -4 -12   75.37    3.12
  -4   3 -12   77.47    3.40
  -4   3 -11  298.81    8.72
   1  -4 -11  299.90    8.56
  -4   3 -10  215.79    6.53
  -4   1   9   14.34    2.05
   1   3   9   11.39    2.09
   3  -4   9   14.20    2.25
   1  -4  -9   14.29    1.79
  -4   1   9   10.91    1.79
   3   1  -8 1722.35   44.37
  -4   1   8 1683.66   44.55
   1   3   8 1720.55   44.79
   1  -4  -8 1760.90   44.51
  -4   1   8 1681.96   44.30
   3  -4   8 1609.92   44.61
  -4   1   7  550.68   15.88
   3   1  -7  570.46   15.92
   1   3   7  551.08   16.18
  -4   1   7  537.69   16.07
   1  -4  -7  546.97   16.03
   1  -4  -6  402.14   12.09
  -4   1   6  394.35   11.73
   3   1  -6  389.26   11.60
   1  -4  -6  377.19   11.88
   1   3   6  412.26   12.02
   1   3   5 1023.17   26.44
   3   1  -5 1002.92   26.06
   1  -4  -5  992.78   26.57
   3  -4   5  983.72   24.87
   1  -4  -5 1010.71   26.44
  -4   1   5  998.30   26.21
   3   1  -4  182.16    5.84
   1   3   4  182.24    5.97
  -4   1   4  186.19    6.03
   1  -4  -4  181.71    6.10
   1   3   3  602.87   15.98
  -4   1   3  603.71   16.17
   3   1  -3  611.44   15.95
   1  -4  -3  596.30   16.11
  -4   1   2  163.44    5.35
   3  -4   2  169.48    5.30
   1  -4  -2  161.33    5.21
   3   1  -2  173.50    5.10
   1   3   2  175.41    5.03
   1  -4  -1  163.81    4.73
  -4   3  -1  155.35    4.98
   1   3   1  160.29    4.40
   3  -4   1  156.41    5.02
   3  -4   1  158.72    5.08
   3   1  -1  159.54    4.76
  -4   3   0  703.68   18.23
   1  -4   0  677.70   17.46
   3   1   0  697.34   17.73
   3  -4   0  720.79   18.31
   3  -4   0  669.93   18.03
   3  -4  -1 2452.55   61.31
   1  -4   1 2429.05   60.51
  -4   3   1 2487.36   61.54
   3  -4  -1 2513.18   61.60
   3  -4  -2 2546.10   65.09
  -4   3   2 2568.56   65.32
   3  -4  -2 2667.95   65.37
   1  -4   2 2617.22   64.17
  -4   3   3  694.41   18.76
   3  -4  -3  681.41   18.47
   3  -4  -4  760.70   24.54
   3  -4  -4 1145.71   25.09
   3  -4  -5  489.93   14.17
   3  -4  -5  498.83   14.17
  -4   3   5  478.14   14.23
   1  -4   5  487.26   13.43
   3   1   6  703.65   19.42
   3  -4  -6  672.71   19.23
   1  -4   6  674.33   18.51
  -4   3   6  687.90   19.36
   3  -4  -7 3914.95  100.49
   1  -4   7 4048.52   99.72
  -4   3   7 3997.46  100.45
  -4   3   7 3888.92  100.13
   3   1   7 4093.91  100.72
  -4   3   8  168.48    6.68
   1  -4   8  170.04    6.28
   3  -4  -8  162.87    6.84
   3   1   8  162.18    6.90
   1  -4   9   96.80    4.68
   3   1   9   96.19    5.23
  -4   1  -9   95.64    3.38
  -4   3  10  337.06    9.23
   1  -4  10  322.36   11.19
   1   3 -10  327.61    9.45
  -4   1 -10  339.27    9.37
   1   3 -11  455.99   12.48
  -4   3  11  440.95   12.09
  -4   1 -11  450.92   12.31
   1   3 -12   89.92    3.71
  -4   1 -12   83.54    3.45
   1   3 -13   22.41    2.16
   3  -4 -13   25.92    2.08
  -4   1 -13   27.68    2.14
   1   3 -14   81.28    3.80
   3  -4 -14   75.16    3.51
  -4   1 -14   81.72    3.63
  -4   1 -15  255.10    7.91
   1   3 -15  259.41    8.17
   3  -4 -15  232.36    7.82
   3  -4 -16    5.23    1.85
   1   3 -16    7.49    2.10
  -4   1 -16    7.15    1.87
   1   3 -17   13.60    2.44
   3  -4 -17   13.79    2.02
  -4   1 -17   13.76    2.08
   3  -4 -18   13.65    1.94
   1   3 -18   15.43    2.33
  -4   1 -18   14.31    2.07
  -4   1 -19    1.77    1.62
   3  -4 -19    1.26    1.54
   1   3 -19   -1.44    2.03
  -4   1 -20   20.15    2.08
   1   3 -20   26.00    2.26
   3  -4 -20   23.23    1.87
  -4   1 -20   24.04    1.94
  -4   1 -21   26.75    1.75
  -4   1 -21   24.14    1.91
   3  -4 -21   26.80    1.71
   1   3 -22   31.07    1.73
  -4   1 -22   25.06    1.32
  -5   3 -22   11.54    1.04
   3   2 -22   12.55    1.29
  -5   3 -21   21.77    1.71
  -5   3 -21   25.30    1.75
   3   2 -21   24.58    1.93
  -5   3 -20   11.22    1.84
  -5   3 -20   11.97    1.75
   3   2 -20   10.45    1.88
   3   2 -19   41.72    2.80
  -5   3 -19   40.26    2.54
  -5   3 -19   38.65    2.85
  -5   3 -18  103.25    4.63
  -5   3 -18  103.73    4.17
   3   2 -18   99.75    4.38
  -5   3 -17   24.18    2.50
   2  -5 -17   24.90    2.04
   3   2 -17   26.86    2.72
   2  -5 -16    6.45    1.44
  -5   3 -16    4.91    1.98
   3   2 -16    8.32    2.24
  -5   3 -15   24.44    2.34
   2  -5 -15   18.90    1.89
   3   2 -15   18.98    2.48
   2  -5 -14  194.65    6.43
  -5   3 -14  208.07    6.71
   3   2 -14  198.01    6.93
  -5   3 -13   47.08    2.72
   2  -5 -13   46.65    2.50
   3   2 -13   45.22    2.86
   2  -5 -12   85.38    3.41
  -5   2  12   87.73    3.38
   3   2 -12   93.20    3.83
  -5   3 -12   88.82    3.66
  -5   2  11  157.03    5.08
  -5   3 -11  161.76    5.32
  -5   3 -10  302.35    8.82
  -5   2  10  313.63    8.71
   2   3   9  368.61   12.66
  -5   2   9  370.76   10.18
   2  -5  -9  366.68   12.33
  -5   3  -9  389.74   10.33
   3  -5   9  340.55   12.16
  -5   2   8  518.28   16.03
   3  -5   8  511.16   15.66
   2   3   8  538.85   16.03
   2  -5  -8  541.24   15.95
  -5   2   8  525.57   15.64
   2  -5  -8  506.81   15.95
  -5   3  -8  505.97   13.71
   2  -5  -7  225.91    8.20
  -5   2   7  221.92    7.91
  -5   2   7  213.65    8.16
   2   3   7  229.02    8.14
   2  -5  -7  230.36    8.31
  -5   2   6  931.72   27.40
  -5   2   6 1016.30   27.20
   2   3   6 1015.99   27.24
   2  -5  -6 1004.05   27.39
   2  -5  -6 1063.56   27.81
   3   2  -6 1038.04   26.74
   2   3   5  171.06    6.04
  -5   2   5  168.50    6.10
   3   2  -5  163.14    5.55
   2  -5  -5  168.00    6.46
   2  -5  -5  171.68    6.19
   3   2  -4  210.76    6.43
   2  -5  -4  224.87    7.13
   2   3   4  231.93    6.96
  -5   2   4  225.74    7.10
   3   2  -3 1667.92   41.12
   2   3   3 1626.08   41.43
  -5   2   3 1622.97   41.84
  -5   3  -3 1586.46   40.94
   3  -5   3 1681.73   41.44
   2  -5  -3 1679.08   41.82
  -5   2   2  716.74   19.14
   2  -5  -2  734.62   18.93
  -5   3  -2  699.97   18.71
   3  -5   2  709.85   18.74
   3   2  -2  721.02   18.33
   2   3   2  716.30   18.54
   2  -5  -1  654.63   16.92
  -5   3  -1  632.19   17.11
   3  -5   1  659.32   17.00
   2   3   1  631.64   16.40
   3   2  -1  650.17   16.48
   3   2   0 1013.23   22.99
   3  -5   0 1048.55   23.64
   2  -5   0 1033.54   23.26
  -5   3   0 1049.11   23.97
   2  -5   1  166.11    5.08
   3   2   1  172.79    5.10
  -5   3   1  176.14    5.96
   3  -5  -1  184.22    5.66
   3  -5  -2 2705.92   62.83
   3  -5  -2 2712.30   63.42
  -5   3   2 2617.03   63.17
   3  -5  -3  201.97    6.46
   2  -5   3  194.42    5.62
  -5   3   3  190.15    6.36
  -5   3   3  192.88    6.70
  -5   2  -4  110.80    3.52
  -5   3   4  125.27    4.73
   3  -5  -4  118.63    4.73
  -5   3   4  116.23    4.96
   3  -5  -5  135.91    5.38
  -5   3   5  128.28    5.10
   3  -5  -5  128.10    5.41
   3   2   5  133.89    5.27
   3  -5  -6 1663.65   43.59
   3   2   6 1717.96   43.61
  -5   3   6 1678.52   43.85
  -5   3   6 1608.82   43.25
   3  -5  -6 1681.45   43.73
   2  -5   6 1670.95   42.89
   2  -5   7 1397.81   36.87
   3   2   7 1369.66   37.56
   3  -5  -7 1440.59   37.76
   3  -5  -7 1416.34   37.62
  -5   3   7 1426.81   37.87
  -5   3   7 1417.85   37.33
   3   2   8  114.21    5.55
  -5   3   8  113.47    5.33
   3  -5  -8  118.06    5.66
  -5   3   8  120.54    5.71
   2  -5   8  116.50    5.06
  -5   2  -9  466.14   12.30
   2  -5   9  439.35   13.99
  -5   3   9  449.17   12.22
   2   3 -10  210.41    6.47
  -5   3  10  202.67    6.29
  -5   2 -10  217.02    6.42
  -5   2 -11   46.21    2.40
   2   3 -11   48.05    2.55
  -5   3  11   44.22    2.24
  -5   3  12  145.51    4.79
   2   3 -12  150.71    5.17
   3  -5 -12  143.24    4.89
  -5   2 -12  133.95    4.90
   3  -5 -13  159.63    5.47
   2   3 -13  157.09    5.71
  -5   2 -13  166.22    5.57
  -5   2 -14   65.62    3.32
   3  -5 -14   65.38    3.20
   2   3 -14   68.07    3.50
  -5   2 -15  143.47    5.34
   3  -5 -15  141.27    5.18
   2   3 -15  145.34    5.54
   3  -5 -16    9.02    1.70
  -5   2 -16    8.76    1.90
   2   3 -16   11.11    2.15
  -5   2 -17    0.72    1.76
   3  -5 -17   -0.34    1.44
   2   3 -17    1.65    2.09
   3  -5 -18   42.26    2.48
   2   3 -18   43.27    2.94
  -5   2 -18   37.86    2.61
   3  -5 -19   51.74    2.58
  -5   2 -19   52.39    3.21
  -5   2 -19   53.51    2.77
   2   3 -19   56.05    3.20
   2   3 -20    4.14    1.61
  -5   2 -20    3.29    1.67
   3  -5 -20    2.35    1.09
  -5   2 -20    6.22    1.42
  -5   2 -21   25.01    1.85
   2   3 -21   28.28    1.94
  -5   2 -21   26.67    1.64
   2   3 -22    5.49    1.05
  -5   2 -22    2.72    0.72
  -6   3   0 1072.31   27.66
   3   3   0 1023.14   26.21
   3  -6   0 1112.74   27.19
   3   3   1  187.90    5.41
  -6   3   1  196.79    6.69
   3  -6  -1  186.98    6.10
  -6   3  -1  186.28    6.27
   3  -6   1  203.77    6.04
  -6   3   2  348.71   10.90
   3   3   2  348.83    9.95
   3  -6   2  355.19   10.00
   3  -6  -2  365.50   10.47
  -6   3  -2  367.35   10.28
   3   3   3  449.59   12.62
   3  -6  -3  434.40   12.95
  -6   3  -3  454.95   12.30
  -6   3   3  455.56   13.55
   3  -6  -3  468.42   13.76
   3   3  -3  441.17   11.70
  -6   3   3  475.58   13.23
   3  -6   3  462.16   12.42
   3  -6  -4  277.71    9.11
   3   3   4  282.48    8.76
  -6   3  -4  267.26    7.77
   3  -6   4  297.14    8.41
  -6   3   4  282.86    9.50
  -6   3   4  303.16    9.18
   3  -6  -5  984.73   26.15
  -6   3   5  962.48   26.01
   3   3   5 1002.98   25.88
   3  -6  -5  986.60   26.67
   3  -6  -6  872.28   23.84
  -6   3   6  846.76   23.54
   3  -6  -6  862.91   24.12
   3   3   6  826.95   23.42
   3   3   7  388.19   12.79
   3  -6  -7  432.37   13.51
  -6   3  -7  405.67   11.01
   3  -6  -7  433.16   13.30
  -6   3   7  381.74   13.23
  -6   3   7  417.87   12.93
   3  -6   7  405.97   12.51
  -6   3   7  406.77   11.03
  -6   3   8  113.31    3.94
  -6   3  -8  117.39    3.94
   3  -6   8  111.08    5.13
   3   3   8  120.24    5.64
  -6   3   9  177.34    5.61
  -6   3  -9  182.41    5.64
  -6   3  10  330.31    9.43
  -6   3 -10  334.95    9.49
  -6   3  11  307.35    8.94
  -6   3 -11  308.55    9.03
   3   3 -11  309.41    9.12
   3   3 -12   10.40    1.78
  -6   3 -12    8.04    1.64
  -6   3  12    7.35    1.40
  -6   3  13  134.35    4.71
  -6   3 -13  138.43    5.02
   3   3 -13  132.44    5.14
   3   3 -14  245.18    7.76
   3  -6 -14  227.74    7.24
  -6   3 -14  229.11    7.49
   3   3 -15   38.94    2.87
  -6   3 -15   36.21    2.63
   3  -6 -15   33.54    2.27
   3   3 -16   16.16    2.24
   3  -6 -16   15.02    1.70
  -6   3 -16   13.18    2.01
  -6   3 -17   13.52    2.04
   3   3 -17   16.23    2.22
  -6   3 -18   15.04    2.02
   3   3 -18   11.98    2.16
  -6   3 -19   66.48    3.04
  -6   3 -19   63.23    3.51
   3   3 -19   61.72    3.16
  -6   3 -20    2.21    1.26
  -6   3 -20    4.11    1.76
   3   3 -20    2.43    1.57
  -6   3 -21    0.97    0.97
  -6   3 -21    0.76    1.11
   3   3 -21    0.52    1.15
   3   3 -22   22.80    1.26
   4  -2   0 2366.37   59.15
   4  -2  -1 2806.93   67.48
  -2   4   1 2614.58   66.99
   4  -2   1 2729.45   67.42
  -2   4   2  457.25   12.22
  -2  -2   2  453.95   11.55
   4  -2  -2  446.84   12.57
  -2   4   3 1564.52   39.68
   4  -2  -3 1568.65   39.99
  -2  -2   3 1566.85   38.98
  -2   4   4  888.62   23.47
  -2  -2   4  890.62   22.83
   4  -2  -4  902.63   23.77
   4  -2  -5  288.50    8.94
  -2  -2   5  272.14    8.06
  -2   4   5  278.45    8.65
  -2  -2   6 1512.78   38.16
   4  -2  -6 1502.09   39.09
  -2   4   6 1458.53   38.75
  -2  -2   7 1405.64   37.38
  -2  -2  -7 1483.94   37.32
  -2   4   7 1447.12   38.10
   4  -2  -7 1458.98   38.33
   4  -2  -8  600.30   18.08
  -2  -2  -8  620.90   16.97
  -2   4   8  605.64   17.91
  -2  -2   8  614.55   17.27
  -2  -2   9   78.74    4.14
  -2   4  -9   92.44    3.29
  -2   4   9   93.93    4.89
   4  -2   9   87.59    5.12
   4  -2  -9   90.90    4.94
  -2   4 -10    6.07    1.23
  -2  -2  10    8.06    1.61
  -2   4 -11   37.63    2.21
  -2  -2 -11   37.67    2.00
  -2   4 -12  196.22    6.47
  -2  -2 -12  207.61    6.28
  -2  -2 -13   30.70    2.06
  -2   4 -13   36.27    2.40
  -2   4 -13   31.93    2.30
  -2   4 -14    3.86    1.52
  -2  -2 -14    7.13    1.50
  -2   4 -14    5.17    1.87
  -2   4 -15  227.11    7.56
  -2  -2 -15  234.50    7.31
  -2   4 -15  232.20    7.64
   4  -2 -15  232.24    7.67
  -2   4 -16   13.96    2.31
  -2   4 -16   12.32    1.95
   4  -2 -16   12.09    2.27
  -2  -2 -16   13.40    1.80
  -2   4 -17   -0.29    1.58
   4  -2 -17    6.01    2.14
  -2   4 -17    3.99    2.06
  -2  -2 -17    1.66    1.48
  -2   4 -18  113.98    4.72
   4  -2 -18  118.87    4.98
  -2  -2 -18  113.02    4.27
   4  -2 -19   19.66    2.46
  -2   4 -19   18.26    2.21
  -2  -2 -19   17.66    1.69
   4  -2 -20   14.52    2.00
  -2  -2 -20   13.07    1.39
  -2   4 -20   14.79    1.97
  -2   4 -21   41.48    2.40
   4  -2 -21   40.87    2.35
  -2   4 -22    2.12    1.13
   4  -2 -22    2.29    1.06
   4  -1 -22   33.98    1.88
   4  -1 -21   25.76    2.05
   4  -1 -20    7.85    1.91
   4  -1 -19   17.88    2.33
  -1  -3 -19   16.72    1.59
  -3   4 -19   17.21    1.90
  -1  -3 -18  159.85    5.48
  -3   4 -18  167.95    5.95
   4  -1 -18  176.73    6.37
  -3   4 -17   24.74    2.46
   4  -1 -17   23.81    2.84
  -3   4 -17   23.19    2.66
  -1  -3 -17   24.57    2.06
  -3   4 -16    7.37    2.06
  -1  -3 -16    7.61    1.49
  -3   4 -16    7.23    2.13
  -3   4 -15   16.55    2.33
  -1  -3 -15   18.74    1.81
  -3   4 -15   18.08    2.31
  -3   4 -14   20.33    2.21
  -1  -3 -14   18.95    1.79
  -1  -3 -13   22.28    1.75
  -3   4 -13   25.56    2.20
  -3   4 -12   68.93    3.26
  -1  -3 -12   77.51    3.07
  -3   4 -11  295.98    8.58
  -1  -3 -11  289.43    8.29
  -3  -1  10  232.78    8.67
  -3   4 -10  240.80    7.07
  -3  -1  10  231.30    8.63
  -3  -1   9   10.73    1.66
  -3  -1   9    8.61    1.59
  -3   4  -9   12.32    1.33
   4  -3   9    9.13    2.13
  -1   4   9    8.18    1.80
   4  -1  -9   11.39    2.01
  -1  -3  -9    6.55    1.32
  -1   4   8 1662.29   44.46
   4  -1  -8 1658.86   44.60
  -1  -3  -8 1801.28   44.07
  -3  -1   8 1648.35   43.87
  -1   4   7  551.39   16.00
   4  -1  -7  535.08   16.07
  -1  -3  -7  558.81   15.76
  -3  -1   7  548.25   15.52
  -3  -1   6  402.80   11.62
   4  -1  -6  402.08   12.21
  -1   4   6  404.03   12.03
   4  -1  -5 1008.54   27.11
  -1   4   5  996.77   26.85
  -3  -1   5 1057.46   26.61
   4  -1  -4  178.15    6.12
  -1   4   4  178.49    5.90
  -3  -1   4  183.18    5.61
  -3  -1   3  599.88   15.95
  -1   4   3  628.56   16.26
   4  -1  -3  615.79   16.60
  -1   4   2  183.29    5.38
   4  -1  -2  178.62    5.79
  -3  -1   2  180.08    5.22
  -1   4   1  152.73    4.30
   4  -1  -1  151.62    4.89
   4  -1   0  649.97   17.19
  -3   4   1 2428.21   61.08
   4  -1   1 2480.10   61.26
  -3   4   2 2679.07   66.79
  -1  -3   3  554.73   14.33
  -3   4   3  610.14   15.46
  -3   4   4 1089.33   28.03
  -1  -3   4 1063.96   27.04
  -3   4   5  459.42   13.25
  -1  -3   5  461.12   12.43
  -3   4   6  723.95   19.48
  -1  -3   6  716.87   18.65
  -1  -3   7 3934.90   99.08
  -3  -1  -7 3997.02   98.66
  -3   4   7 4041.48  100.01
   4  -3  -7 3933.24  100.23
  -3   4   8  135.86    5.94
   4  -3  -8  143.46    6.21
  -1  -3   8  138.05    5.34
  -3  -1  -8  142.09    4.76
  -1   4  -9  111.25    3.79
  -1  -3   9  104.35    4.74
  -1   4 -10  337.24    9.44
  -1   4 -10  333.72    9.42
  -3   4  10  332.55    9.21
  -1  -3  10  312.58   10.83
  -3  -1 -10  336.89    9.25
  -1   4 -11  457.81   12.62
  -3   4  11  454.83   12.32
  -1   4 -11  451.18   12.61
  -3  -1 -11  466.59   12.44
  -1   4 -12   85.37    3.50
  -1   4 -12   83.05    3.54
  -3  -1 -12   83.22    3.35
  -1   4 -13   20.37    1.84
  -3  -1 -13   21.76    1.88
  -3  -1 -14   84.21    3.57
  -1   4 -14   79.84    3.78
  -1   4 -14   84.90    3.63
  -1   4 -15  245.59    7.83
  -3  -1 -15  239.03    7.50
   4  -3 -15  227.46    7.79
  -1   4 -16    6.99    2.05
  -3  -1 -16    8.97    1.75
   4  -3 -16    7.92    2.10
   4  -3 -17   12.27    2.31
  -1   4 -17    7.15    2.25
  -3  -1 -17    8.52    1.75
   4  -3 -18   17.74    2.33
  -1   4 -18   20.94    2.40
  -3  -1 -18   16.61    1.87
   4  -3 -19   -0.70    1.77
  -3  -1 -19    0.70    1.38
  -1   4 -19   -0.09    1.75
  -1   4 -20   23.31    2.13
   4  -3 -20   18.60    2.01
  -3  -1 -20   19.28    1.64
  -3  -1 -21   25.02    1.50
  -3  -1 -21   26.47    1.83
   4  -3 -21   29.57    2.04
   4  -3 -22   26.88    1.54
  -1   4 -22   29.95    1.69
  -4   4 -22   35.44    1.76
  -4   4 -21   10.46    1.54
  -4   4 -20    0.07    1.60
  -4   4 -20    0.64    1.32
  -4   4 -19  181.95    6.23
   0  -4 -18    3.81    1.29
  -4   4 -18    3.45    1.95
  -4   4 -17    1.71    2.13
   0  -4 -17    1.53    1.30
   4   0 -17    2.30    2.39
  -4   4 -16  339.51   10.31
   0  -4 -16  315.86    9.44
   4   0 -16  318.61   10.15
   0  -4 -15  290.82    8.73
   4   0 -15  299.70    9.44
   4   0 -14  776.08   20.60
   0  -4 -14  747.11   20.06
   0  -4 -13  140.22    4.78
  -4   4 -12   83.66    3.55
  -4   4 -11    1.51    1.32
  -4   4 -10    0.33    1.13
  -4   0   9  139.55    6.04
   4  -4   9  144.90    6.80
   0   4   9  144.78    6.46
  -4   4  -9  155.27    4.84
   4   0  -9  146.57    6.49
  -4   0   9  149.78    6.42
   0  -4  -9  148.36    6.16
   0  -4  -8    0.15    1.07
   0   4   8    0.49    1.32
   4   0  -8    1.93    1.36
  -4   0   8    1.39    1.21
  -4   0   7  852.23   23.84
   0   4   7  876.56   24.22
   0  -4  -7  932.00   24.44
   4   0  -7  871.48   24.20
   4   0  -6   33.04    2.50
   0   4   6   34.79    2.46
  -4   0   6   35.77    2.35
  -4   0   5   33.10    2.16
   4   0  -5   29.99    2.25
   0   4   5   32.43    2.17
   4   0  -4    2.57    1.12
   0   4   4    1.87    0.98
  -4   0   4    4.05    1.08
  -4   0   3   46.09    2.33
   4   0  -3   50.88    2.54
   0   4   3   50.83    2.26
  -4   0   2   -0.29    0.90
   4  -4   2    0.05    0.79
   4  -4   2    0.46    1.06
   0   4   2   -0.29    0.82
   4   0  -2    0.89    1.06
   4  -4   1  555.94   15.11
   4   0  -1  562.62   14.88
   0   4   1  553.47   14.11
   4  -4   1  564.39   14.84
   4  -4   0  139.83    4.76
   4   0   0  145.10    4.67
   4  -4   0  134.50    4.82
   4  -4  -1 3017.23   73.45
   4   0   1 2908.10   73.12
  -4   4   1 2922.90   73.32
   4  -4  -1 2923.84   73.50
   4  -4  -2 7667.72  187.20
  -4   4   2 7463.66  186.96
   4  -4  -2 7657.33  187.19
  -4   4   3 2651.63   63.08
   0  -4   3 2459.47   61.74
   4  -4  -3 2542.83   63.27
   4  -4  -4    0.98    1.34
   0  -4   4    2.56    0.70
  -4   4   4    0.88    1.22
  -4   4   5  555.60   15.27
   0  -4   5  536.82   14.30
   4  -4  -5  511.04   15.39
   4  -4  -6 2041.23   51.61
  -4   4   6 1983.12   51.27
   0  -4   6 1970.22   50.25
   0  -4   7 3061.46   73.50
   4  -4  -7 3009.58   74.83
  -4   4   7 3193.64   74.58
  -4   4   8   33.66    2.85
   4  -4  -8   38.71    3.11
   0  -4   8   32.71    2.30
   4   0   8   35.06    3.12
   0  -4   9  992.19   28.19
   0   4  -9 1071.89   26.79
  -4   4  10   35.23    1.94
  -4   0 -10   40.53    2.00
   0   4 -10   38.55    2.11
  -4   0 -11  502.32   13.36
  -4   4  11  488.14   13.26
   0   4 -11  486.43   13.49
  -4   0 -12    3.76    1.31
   0   4 -12    4.46    1.43
  -4   4  12    4.46    1.18
   0   4 -13   14.23    1.82
  -4   0 -13   13.52    1.72
  -4   0 -14  348.82   10.21
   0   4 -14  348.93   10.48
   4  -4 -14  356.56   10.48
   4  -4 -15   15.36    2.07
  -4   0 -15   15.00    1.96
   0   4 -15   17.10    2.22
   0   4 -16    2.55    1.91
  -4   0 -16    4.20    1.65
   4  -4 -16    5.22    1.94
   4  -4 -17  157.39    5.85
  -4   0 -17  158.73    5.60
   0   4 -17  165.77    5.99
   0   4 -18  123.73    5.02
  -4   0 -18  131.23    4.73
   4  -4 -18  122.68    4.86
   0   4 -19  164.29    5.83
   4  -4 -19  166.17    5.68
  -4   0 -19  164.51    5.46
   0   4 -20   79.92    3.49
  -4   0 -20   75.22    3.03
   4  -4 -20   78.13    3.28
   4  -4 -21   38.21    2.00
  -4   0 -21   32.78    1.70
  -4   0 -21   32.90    2.03
   0   4 -22   10.74    1.21
   4  -4 -22    8.63    0.91
  -5   4 -22   56.67    2.12
   4   1 -22   53.80    2.26
  -5   4 -21    4.88    1.19
   4   1 -21    4.51    1.36
  -5   4 -21    6.19    1.28
  -5   4 -20   51.14    2.68
   4   1 -20   54.98    2.91
  -5   4 -20   51.98    2.77
  -5   4 -19   58.99    3.29
   4   1 -19   56.39    3.25
  -5   4 -19   52.85    2.96
  -5   4 -18   28.41    2.82
  -5   4 -18   25.02    2.43
   4   1 -18   25.86    2.71
  -5   4 -17  161.38    6.17
   4   1 -17  153.19    5.91
  -5   4 -17  147.34    5.63
   4   1 -16    4.42    2.16
  -5   4 -16    4.78    2.14
   4   1 -15    5.84    2.13
  -5   4 -15    6.64    1.98
   4   1 -14   94.73    4.35
   4   1 -13   22.52    2.31
  -5   1  11  133.48    4.42
  -5   1  10   11.20    1.28
   1  -5  -9  412.65   13.45
  -5   1   8  340.54   11.65
   4   1  -8  362.19   11.39
  -5   1   8  340.45   11.18
   1   4   8  347.81   11.49
   1  -5  -8  341.93   11.54
  -5   1   7  955.75   27.03
   1   4   7  981.32   26.81
   4   1  -7  980.66   26.54
   1  -5  -7 1011.18   27.24
  -5   1   7  969.95   26.55
   4   1  -6  159.49    5.79
   1  -5  -6  151.76    6.26
   1   4   6  151.84    5.83
  -5   1   6  155.21    5.82
   4  -5   5  293.05    8.20
   1   4   5  327.28    9.53
   1  -5  -5  322.77    9.74
  -5   1   5  327.02    9.61
   4   1  -5  313.92    9.46
  -5   1   4  803.60   21.35
   4  -5   4  789.53   20.46
   4   1  -4  788.58   21.12
   1  -5  -4  811.82   21.36
   1   4   4  799.51   21.08
   4  -5   3  764.63   20.15
   4  -5   3  767.65   20.62
   4   1  -3  763.65   20.35
   1   4   3  785.18   20.16
  -5   1   3  789.30   20.64
   1  -5  -3  780.14   20.43
   4  -5   2  144.98    4.77
  -5   1   2  146.56    4.88
   1  -5  -2  143.43    4.54
   4  -5   2  144.38    4.95
   1   4   2  137.72    4.20
   4  -5   1  144.02    5.00
   1   4   1  140.24    3.81
   4  -5   1  143.30    4.94
   1  -5  -1  142.06    4.36
   4   1  -1  154.37    4.72
   4  -5   0  181.93    5.93
   4  -5   0  183.58    6.08
   1  -5   0  176.83    5.06
   4   1   0  186.07    5.57
   1  -5   1  240.12    6.49
   4   1   1  247.24    7.23
   4  -5  -1  251.96    7.82
  -5   4   1  260.70    7.94
   4  -5  -1  246.32    7.64
   4  -5  -2 2273.24   55.92
   4  -5  -2 2204.86   56.04
  -5   4   2 2253.06   55.81
   1  -5   2 2182.98   54.44
  -5   4   2 2193.46   56.11
   4  -5  -3   69.24    3.34
   4  -5  -3   66.01    3.39
   1  -5   3   67.10    2.36
   1  -5   3   63.62    2.18
  -5   4   3   66.64    3.52
  -5   4   3   65.95    3.27
  -5   4   4  379.29   11.23
   1  -5   4  362.30    9.69
   4  -5  -4  384.74   11.01
   4  -5  -5  294.46    9.42
   1  -5   5  275.07    8.19
   4  -5  -6  851.07   23.21
   1  -5   6  839.33   21.82
   4  -5  -7   39.24    3.06
   4   1   7   40.52    3.17
   1  -5   7   34.95    2.28
   4   1   8  428.42   13.60
   1  -5   8  390.74   12.11
   4  -5  -8  400.20   13.33
  -5   1  -9  291.63    8.23
  -5   4   9  290.32    8.29
   1   4  -9  292.03    8.31
   1   4 -10  140.64    4.77
  -5   4  10  145.03    4.69
  -5   1 -10  140.40    4.68
  -5   4  11  467.11   12.40
  -5   1 -11  444.73   12.38
   1   4 -11  441.73   12.54
  -5   4  12  296.36    8.64
  -5   1 -12  294.72    8.72
   1   4 -12  300.49    8.93
  -5   1 -13  265.75    8.14
  -5   4  13  266.27    7.96
   1   4 -13  274.69    8.39
   1   4 -14  106.78    4.39
   4  -5 -14  100.94    4.19
  -5   1 -14   99.32    4.12
   4  -5 -15   24.86    2.26
   1   4 -15   30.88    2.63
  -5   1 -15   28.46    2.37
   4  -5 -16   62.03    3.34
  -5   1 -16   64.05    3.29
   1   4 -16   65.67    3.59
   1   4 -17   14.56    2.24
  -5   1 -17   14.42    1.99
   4  -5 -17   16.06    1.98
   1   4 -18    8.58    1.98
   4  -5 -18    8.49    1.70
  -5   1 -18    7.82    1.68
  -5   1 -19    5.01    1.50
   1   4 -19    6.16    1.85
   4  -5 -19    4.35    1.47
  -5   1 -20   16.06    1.57
  -5   1 -20   14.45    1.95
   4  -5 -20   14.15    1.46
   1   4 -20   18.48    1.92
  -5   1 -21   28.76    1.92
   1   4 -21   32.79    1.92
  -5   1 -21   29.23    1.57
   1   4 -22    1.20    0.84
   4   2 -22    8.24    0.92
  -6   4 -22    9.71    0.84
   4   2 -21    1.32    1.20
  -6   4 -21    0.26    0.95
  -6   4 -21    1.97    1.09
   4   2 -20   87.27    3.58
  -6   4 -20   84.93    3.37
  -6   4 -20   89.19    3.69
   4   2 -19    9.17    2.00
  -6   4 -19    8.62    2.01
  -6   4 -19    7.74    1.65
  -6   4 -18    4.25    1.74
   4   2 -18    6.14    2.02
  -6   4 -18    7.47    2.30
   4   2 -17   89.01    4.16
  -6   4 -17   87.51    4.53
  -6   4 -17   85.90    3.93
   4   2 -16    1.51    2.11
  -6   4 -16    3.17    1.89
   4   2 -15    7.21    2.11
  -6   4 -15    6.94    1.93
  -6   4 -14  225.15    7.41
   4   2 -14  224.33    7.60
   4   2 -13   -0.10    1.71
  -6   4 -13    1.40    1.56
  -6   2  13    1.40    1.18
  -6   2  12   22.51    1.83
  -6   4 -12   22.80    2.10
  -6   2  11   73.44    3.10
  -6   4 -11   72.91    3.27
  -6   2  10    9.34    1.32
  -6   4 -10   11.79    1.50
  -6   4  -9   62.82    2.79
  -6   2   9   65.31    2.73
   2   4   8  687.57   20.15
  -6   2   7   35.85    2.70
   2  -6  -7   31.19    2.91
   2  -6  -7   29.02    2.68
   4   2  -7   33.20    2.41
   2   4   7   31.87    2.59
   4   2  -6   85.63    3.80
   2   4   6   87.94    4.14
   2  -6  -6   86.64    4.71
  -6   2   6   75.66    4.41
   2  -6  -6   89.84    4.40
  -6   2   6   81.33    4.06
   4  -6   5  938.35   24.32
   2  -6  -5  962.59   25.54
   2  -6  -5 1017.43   26.45
   4   2  -5  931.17   24.76
  -6   2   5  932.84   25.42
   2   4   5  904.98   25.08
   4   2  -4   74.68    3.12
   4  -6   4   79.41    3.44
   2  -6  -4   71.19    3.50
   2   4   4   76.34    3.31
  -6   2   4   77.65    3.65
   4  -6   4   71.30    3.08
   4   2  -3  747.12   19.52
   2  -6  -3  781.55   20.10
   4  -6   3  774.92   20.00
   4  -6   3  752.55   20.00
  -6   2   3  769.51   20.35
   4   2  -2 1049.78   26.50
   4  -6   2 1036.45   27.24
   2   4   2  997.15   26.19
   2  -6  -2 1089.56   26.97
   4  -6   2 1051.04   27.06
   4  -6   1   19.98    1.67
   2   4   1   15.16    0.68
   2  -6  -1   19.82    1.41
   4   2  -1   21.19    1.38
   4  -6   1   19.51    1.84
  -6   4  -1   21.07    1.76
  -6   4   0  378.62   11.04
   4  -6   0  383.30   11.20
   4   2   0  361.94   10.05
   4  -6   0  377.16   10.73
   2  -6   0  358.30   10.03
  -6   4   1  199.20    6.82
   2  -6   1  187.27    5.63
   4   2   1  197.90    5.88
   4  -6  -1  195.47    6.48
   2  -6   2  341.17    9.49
   4  -6  -2  366.25   11.01
  -6   4   2  353.82   10.95
   4  -6  -2  359.35   10.58
   4  -6  -3  101.82    4.79
   4  -6  -3  113.21    4.67
  -6   4   3  107.97    4.87
   2  -6   3  106.50    3.51
  -6   4   4  258.56    8.74
   4  -6  -4  253.02    8.60
   4  -6  -4  262.78    8.39
   2  -6   4  237.67    6.97
   4  -6  -5   74.85    3.94
  -6   2  -5   62.02    2.36
  -6   4   5   72.97    3.72
   4   2   5   68.86    3.63
  -6   4   5   63.86    3.91
   2  -6   5   72.06    3.07
   2  -6   6  182.70    6.37
   4   2   6  199.47    7.37
   4  -6  -6  200.86    7.63
  -6   4   6  187.67    7.14
   4  -6  -6  193.77    7.49
   4   2   7   38.64    3.05
   4  -6  -7   32.37    2.95
  -6   4   7   36.55    2.86
   2  -6   7   36.07    2.37
  -6   2  -7   38.18    1.88
  -6   4   7   36.12    1.93
  -6   2  -8   49.52    2.28
   4   2   8   47.79    3.64
  -6   4   8   54.13    2.41
  -6   2  -9   88.00    3.32
  -6   4   9   85.41    3.34
   2   4  -9   89.06    3.34
  -6   4  10  340.55    9.62
   2   4 -10  338.78    9.68
  -6   2 -10  334.61    9.58
  -6   4  11   90.63    3.55
  -6   2 -11   89.33    3.55
   2   4 -11   86.04    3.63
   2   4 -12  123.53    4.59
  -6   4  12  113.04    4.27
  -6   2 -12  118.82    4.40
  -6   4  13  372.96   10.78
  -6   2 -13  388.08   10.94
   4  -6 -13  373.64   10.83
   2   4 -13  379.83   11.10
  -6   4  14    1.70    1.25
   2   4 -14    1.97    1.73
   4  -6 -14    1.28    1.33
  -6   2 -14    3.49    1.69
   4  -6 -15   17.22    1.92
  -6   2 -15   19.45    2.11
   2   4 -16   70.14    3.63
   4  -6 -16   72.23    3.37
  -6   2 -16   75.97    3.52
   2   4 -17    0.78    1.76
  -6   2 -17    0.17    1.56
   4  -6 -17    1.43    1.40
   2   4 -18   15.42    2.11
   4  -6 -18   14.39    1.63
  -6   2 -18   15.06    1.83
  -6   2 -19   62.58    2.85
   2   4 -19   61.68    3.13
  -6   2 -20    6.18    1.77
  -6   2 -20    3.96    1.24
   2   4 -20    5.59    1.58
  -6   2 -21    5.42    1.31
  -6   2 -21    4.93    0.93
   2   4 -21    4.75    1.18
   4   3 -21   26.93    1.56
  -7   4 -21   25.80    1.63
  -7   4 -21   28.38    1.46
  -7   4 -20   12.20    1.75
   4   3 -20   10.82    1.53
  -7   4 -20   11.29    1.36
   4   3 -19   24.94    2.08
  -7   4 -19   26.72    1.97
  -7   4 -19   26.65    2.51
   4   3 -18   72.91    3.52
  -7   4 -18   73.57    3.38
  -7   4 -18   77.82    4.02
   4   3 -17  137.92    5.21
  -7   4 -17  138.00    5.62
  -7   4 -17  133.74    4.99
  -7   4 -16   36.86    2.75
   4   3 -16   37.15    2.79
  -7   4 -15   64.76    3.43
   4   3 -15   63.20    3.51
  -7   4 -14  197.68    6.51
  -7   3  14  178.84    6.06
   4   3 -14  186.90    6.56
  -7   4 -13   37.37    2.54
  -7   3  13   39.59    2.46
   4   3 -13   40.23    2.73
   4   3 -12   92.90    3.94
  -7   4 -12   88.65    3.77
  -7   3  12   85.54    3.63
  -7   4 -11   84.35    3.65
   4   3 -11   87.87    3.73
  -7   3  11   86.84    3.60
  -7   3  10  170.83    5.64
  -7   4 -10  170.10    5.62
  -7   4  -9  185.71    5.88
  -7   3   9  189.73    5.92
  -7   3   9  183.77    5.62
  -7   3   8  113.59    3.96
  -7   4  -8  109.92    3.90
   3   4   8  105.58    3.68
  -7   3   8  109.81    3.71
  -7   4  -7  198.70    5.93
  -7   3   7  198.01    5.82
   3  -7  -7  206.06    7.97
   3   4   7  187.39    5.78
  -7   3   6  346.53    9.35
   3  -7  -6  342.29   11.31
   4  -7   6  328.12   10.39
   3   4   6  347.17   10.91
  -7   4  -6  342.07    9.41
  -7   3   6  330.99   11.09
   3  -7  -5  470.74   14.98
  -7   3   5  469.75   14.14
   3   4   5  467.42   13.63
   4  -7   5  478.37   13.45
   3  -7  -5  468.21   14.14
  -7   4  -5  471.90   12.40
  -7   3   5  418.50   14.47
  -7   3   4  581.78   17.73
   3  -7  -4  626.59   17.13
   3   4   4  584.64   16.43
  -7   3   4  624.28   17.32
   4  -7   4  581.31   16.43
  -7   3   3  935.75   23.93
   4  -7   3  871.24   22.46
   4   3  -3  758.13   21.36
   3  -7  -3  930.46   24.09
   3   4   3  830.94   22.03
   3  -7  -3  981.19   23.14
   3   4   2  516.73   14.28
   3  -7  -2  603.10   15.39
   3   4   2  552.21   14.14
  -7   3   2  571.92   16.15
   4   3  -2  506.59   14.00
  -7   4  -2  581.33   15.33
   4  -7   2  596.53   15.21
   3  -7  -1 1515.55   28.41
   4  -7   1 1457.13   28.47
  -7   4  -1 1479.60   29.00
   4  -7   0 1853.23   45.38
  -7   4   0 1815.64   45.87
   4  -7   0 1859.49   46.18
  -7   3   0 1785.30   45.76
   4   3   0 1677.60   44.17
   3  -7   0 1825.33   44.94
  -7   4   1  901.35   23.73
  -7   3  -1  882.54   23.19
   3  -7   1  861.67   22.42
   4  -7  -1  932.97   24.06
   4  -7  -1  924.61   23.19
  -7   3  -2  428.09   12.46
   4   3   2  409.21   11.77
  -7   4   2  429.26   13.32
   4  -7  -2  465.53   12.89
   3  -7   2  445.45   11.97
   4  -7  -2  448.45   13.59
  -7   4   3  276.85    9.03
   4  -7  -3  285.64    9.63
   3  -7   3  273.80    7.96
   4  -7  -3  275.94    8.96
   4   3   3  263.92    8.37
  -7   4   3  274.42    9.45
  -7   3  -3  259.52    8.16
  -7   4   4  294.89    9.21
   4  -7  -4  285.05    9.19
   3  -7   4  263.12    7.87
  -7   4   4  283.77    9.68
   4   3   4  275.63    8.64
   4  -7  -4  286.47    9.70
   4  -7  -5  116.45    5.18
  -7   4   5  106.99    5.38
   4   3   5   98.42    4.51
   3  -7   5   95.59    3.85
  -7   4   5  116.57    5.04
  -7   4   6   40.08    2.05
  -7   4   6   34.45    1.83
   4   3   6   36.40    2.71
   4  -7  -6   38.92    3.07
  -7   3  -6   35.47    1.87
  -7   4   7  108.27    3.84
  -7   3  -7  106.16    3.73
   4   3   7  110.51    5.27
  -7   4   7  108.89    3.67
  -7   3  -8   56.72    2.52
  -7   4   8   54.54    2.38
  -7   4   8   52.79    2.57
  -7   3  -9  114.38    3.97
  -7   4   9  107.70    4.02
   3   4  -9  108.84    3.89
  -7   4   9  104.06    3.73
  -7   4  10  193.21    6.34
  -7   3 -10  196.78    6.28
   3   4 -10  207.67    6.34
  -7   3 -11  563.63   15.62
   3   4 -11  587.15   15.76
  -7   4  11  580.16   15.68
  -7   4  12  107.78    4.24
   3   4 -12  115.35    4.42
  -7   3 -12  110.64    4.30
  -7   3 -13   70.54    3.41
   3   4 -13   72.60    3.50
  -7   4  13   69.72    3.24
  -7   4  14  149.40    5.28
  -7   3 -14  154.97    5.55
   3   4 -14  157.89    5.70
  -7   3 -15  106.97    4.26
   3   4 -15  100.10    4.27
   3   4 -16  107.37    4.50
  -7   3 -16   99.43    4.24
  -7   3 -17  124.68    4.64
   3   4 -17  119.02    4.75
  -7   3 -18   52.63    2.77
   3   4 -18   53.32    2.99
  -7   3 -18   54.70    3.45
  -7   3 -19   24.99    1.90
   3   4 -19   26.96    2.10
  -7   3 -19   26.18    2.58
  -7   3 -20   23.22    2.07
   3   4 -20   18.99    1.62
  -7   3 -20   23.44    1.59
   3   4 -21    9.42    1.02
  -7   3 -21   10.57    0.95
  -7   3 -21   12.70    1.32
  -8   4   0  156.05    6.24
   4  -8   0  161.37    5.67
  -8   4  -1   26.45    2.25
  -8   4   1   26.95    2.44
   4  -8  -1   29.53    2.69
   4  -8   1   28.84    2.02
   4  -8  -1   28.53    2.12
  -8   4   2  178.61    5.43
   4  -8  -2  190.41    6.65
  -8   4  -2  170.11    6.38
   4  -8   2  171.47    6.01
  -8   4   2  179.46    7.22
  -8   4   3  604.77   18.48
  -8   4   3  580.71   16.10
  -8   4  -3  637.43   16.07
   4  -8  -3  664.15   17.87
   4  -8  -3  627.79   18.87
   4  -8  -4   17.32    2.01
  -8   4   4   13.58    1.36
  -8   4  -4   16.91    1.38
  -8   4  -5   93.07    3.30
   4  -8  -5   87.21    4.58
  -8   4   5   91.18    3.33
  -8   4  -6   69.31    2.81
   4  -8  -6   70.99    4.25
  -8   4   6   70.39    2.83
  -8   4   7    1.04    1.28
  -8   4  -7    1.74    1.10
  -8   4   7    1.50    1.10
  -8   4  -8   30.68    1.98
  -8   4   8   28.62    1.83
  -8   4   8   28.69    2.10
  -8   4   9  310.02    8.97
  -8   4  -9  306.35    8.80
  -8   4   9  289.24    8.58
   4   4 -10  154.17    5.26
  -8   4  10  158.66    5.45
  -8   4  10  150.85    5.02
  -8   4 -10  158.58    5.32
  -8   4  11   82.84    3.59
  -8   4 -11   74.67    3.44
   4   4 -11   78.29    3.43
  -8   4  12  142.10    5.12
  -8   4 -12  135.52    5.02
   4   4 -12  137.78    5.11
  -8   4  13   36.93    2.58
  -8   4 -13   42.17    2.72
   4   4 -13   38.91    2.79
   4   4 -14   15.35    2.02
  -8   4  14   12.67    1.77
  -8   4 -14   13.22    1.98
   4   4 -15  110.09    4.51
  -8   4 -15  116.20    4.43
   4   4 -16    9.73    1.92
  -8   4 -16    5.10    1.71
  -8   4 -17   11.80    2.48
  -8   4 -17   11.66    1.81
   4   4 -17   11.86    1.87
  -8   4 -18   60.78    3.42
   4   4 -18   55.47    2.83
  -8   4 -18   57.54    2.77
  -8   4 -19    2.27    1.25
  -8   4 -19    2.71    1.74
   4   4 -19    3.42    1.32
  -8   4 -20    5.10    1.44
  -8   4 -20    4.03    0.98
   4   4 -20    4.54    1.02
  -8   4 -21    1.76    0.88
   5  -2 -22    9.78    1.20
  -3   5 -22   10.74    1.15
   5  -2 -21   28.15    1.97
  -3   5 -21   26.30    1.87
  -3   5 -20   11.05    1.83
   5  -2 -20   11.64    1.92
  -3   5 -19   43.87    2.69
   5  -2 -19   45.17    3.01
  -3   5 -18  102.84    4.39
   5  -2 -18   96.69    4.56
  -3   5 -18  106.38    4.23
  -3   5 -17   24.17    2.32
  -2  -3 -17   21.61    1.83
   5  -2 -17   27.42    2.69
  -3   5 -17   28.24    2.52
   5  -2 -16    7.31    2.36
  -2  -3 -16    6.11    1.38
  -3   5 -16    7.65    2.03
  -3   5 -16    5.98    1.88
  -2  -3 -15   18.95    1.76
   5  -2 -15   16.09    2.40
  -3   5 -15   21.02    2.30
  -3   5 -15   19.97    2.32
  -3   5 -14  189.93    6.49
  -3   5 -14  190.30    6.71
  -2  -3 -14  192.14    6.10
  -3   5 -13   44.68    2.82
  -3   5 -13   38.57    2.58
  -3   5 -12   80.22    3.58
  -3   5 -12   86.36    3.79
  -2   5  11  168.70    5.37
  -3   5 -11  165.26    5.57
  -3   5 -11  175.72    5.85
  -3   5 -10  304.80    9.15
  -3   5 -10  313.05    8.95
  -2   5  10  314.87    8.80
  -3   5  -9  381.80   10.64
  -2   5   9  370.44   10.29
  -3   5  -9  376.10   10.38
  -3  -2   9  377.50   11.76
  -2  -3  -8  542.61   15.57
   5  -2  -8  500.36   16.22
  -2   5   8  544.52   16.16
  -3  -2   8  535.12   15.28
  -3  -2   7  233.89    7.58
   5  -2  -7  236.07    8.61
  -2   5   7  236.36    8.27
  -3  -2   6 1023.63   26.38
  -2   5   6 1029.19   27.13
   5  -2  -6  964.98   27.39
  -3  -2   5  166.57    5.36
  -2   5   5  175.54    6.05
   5  -2  -5  169.20    6.42
  -3  -2   4  195.70    5.88
  -2   5   4  202.89    6.52
   5  -2  -4  206.94    6.99
  -2   5   3 1739.10   43.96
  -3  -2   3 1738.70   43.30
   5  -2  -3 1741.01   44.56
  -2   5   2  714.16   18.52
   5  -2  -2  699.76   19.14
   5  -2  -1  632.28   17.27
  -2   5   1  636.58   16.55
   5  -2   0 1022.57   26.71
   5  -3  -1  148.31    5.28
   5  -2   1  143.83    5.25
  -3   5   1  152.18    4.89
   5  -3  -2 2614.60   67.19
  -3   5   2 2709.22   66.69
   5  -2   2 2672.83   67.09
   5  -3  -3  214.48    7.05
  -2  -3   3  201.44    5.38
  -3   5   3  205.68    6.55
   5  -3  -4   93.68    4.39
  -2  -3   4  108.45    3.26
  -3   5   4   97.70    4.10
   5  -3  -5  138.23    5.59
  -2  -3   5  136.70    4.37
  -3   5   5  136.44    5.28
   5  -3  -6 1594.13   41.39
  -3   5   6 1600.94   40.94
  -2  -3   6 1541.83   39.81
   5  -3  -7 1462.87   39.00
  -3   5   7 1453.80   38.54
  -2  -3   7 1458.93   37.47
  -3  -2  -8  105.87    4.41
   5  -3  -8  113.94    5.61
  -3   5   8  110.50    5.27
  -2  -3   8  114.99    4.58
  -2   5  -9  452.72   12.27
  -3   5   9  449.49   12.19
  -2   5  -9  457.92   12.46
  -2   5 -10  204.38    6.53
  -2   5 -10  207.49    6.42
  -3   5  10  213.41    6.29
  -2   5 -11   44.23    2.37
  -3   5  11   42.48    2.20
  -3  -2 -11   41.72    2.08
  -2   5 -11   40.88    2.46
  -2   5 -12  148.09    5.21
  -3  -2 -12  154.27    4.94
  -2   5 -12  146.78    5.30
  -3   5  12  147.21    4.93
  -3  -2 -13  162.20    5.26
  -2   5 -13  156.56    5.61
  -2   5 -13  156.49    5.58
  -2   5 -14   68.30    3.48
  -3  -2 -14   65.77    3.03
  -2   5 -14   69.49    3.44
  -3  -2 -15  144.58    4.99
  -2   5 -15  131.57    5.18
   5  -3 -15  144.25    5.58
  -2   5 -15  141.00    5.37
   5  -3 -16    5.54    2.17
  -2   5 -16    4.59    1.64
  -2   5 -16    6.84    2.07
  -3  -2 -16    6.60    1.42
  -2   5 -17    1.64    1.89
   5  -3 -17    0.95    2.09
  -3  -2 -17   -0.30    1.26
  -2   5 -18   43.96    2.91
   5  -3 -18   41.61    3.05
  -3  -2 -18   40.36    2.30
  -2   5 -19   51.08    2.86
   5  -3 -19   47.17    2.93
   5  -3 -20    1.25    1.60
  -2   5 -20    4.04    1.63
  -2   5 -21   29.70    1.91
   5  -3 -21   29.09    1.95
   5  -3 -22    6.36    1.00
  -2   5 -22    4.35    0.96
   5  -1 -22   56.51    2.31
   5  -1 -21    5.23    1.49
  -4   5 -21    7.47    1.36
  -4   5 -20   46.01    2.40
  -4   5 -20   50.86    2.69
  -4   5 -19   61.25    3.06
  -4   5 -19   57.21    3.02
  -4   5 -18   22.91    2.40
  -4   5 -18   22.47    2.32
  -4   5 -17  150.92    5.63
  -4   5 -17  154.00    5.78
  -4   5 -16    6.56    1.98
  -4   5 -16    7.17    2.15
  -4   5 -15    9.17    2.15
  -4   5 -15    9.32    2.15
  -4   5 -14   82.06    4.12
  -4   5 -14   79.75    3.83
  -4   5 -13   12.68    1.83
  -4   5 -13   13.15    2.12
  -4   5 -12   96.55    3.91
  -4   5 -11  129.47    4.55
  -1   5  11  123.56    4.27
  -1   5  10    9.23    1.25
  -4   5 -10    9.36    1.48
  -1   5   9  390.11   10.73
  -1  -4  -9  393.67   12.57
  -4  -1   9  400.31   12.44
  -4   5  -9  396.18   10.86
  -4  -1   8  345.72   10.74
   5  -1  -8  338.31   11.46
  -4   5  -8  330.71    9.38
  -1  -4  -8  361.32   11.30
  -1   5   8  339.58   11.27
  -1   5   7  994.73   26.51
  -4  -1   7  982.68   25.92
   5  -1  -7  922.19   26.64
  -1   5   6  153.72    5.85
  -4  -1   6  154.34    5.51
   5  -1  -6  163.45    6.27
  -4  -1   5  351.15   10.11
   5  -1  -5  351.85   10.88
  -1   5   5  344.16   10.46
  -4  -1   4  790.22   20.71
   5  -1  -4  778.71   21.45
  -1   5   4  802.06   21.00
  -1   5   3  807.05   21.11
  -4  -1   3  820.18   21.01
   5  -1  -3  800.62   21.73
   5  -4   2  139.86    5.12
  -1   5   2  138.33    4.35
   5  -1  -2  136.45    5.01
  -1   5   1  144.93    4.18
   5  -1  -1  148.06    5.06
   5  -4   0  157.88    5.76
   5  -1   0  170.46    5.60
   5  -4  -1  221.48    7.33
   5  -1   1  224.79    7.13
  -4   5   1  230.29    7.02
   5  -4  -2 2212.82   57.30
  -4   5   2 2302.12   56.97
  -4   5   3   59.71    2.98
  -4   5   4  337.66    9.93
  -1  -4   4  318.69    8.36
  -1  -4   5  248.89    7.09
  -4   5   5  266.45    8.42
  -1  -4   6  779.69   20.84
  -4   5   6  844.43   22.29
  -4   5   7   52.41    3.28
  -1  -4   7   45.52    2.37
  -4   5   8  406.78   13.10
  -1   5  -9  299.43    8.34
  -1   5  -9  291.84    8.40
  -4   5   9  286.17    8.28
  -1   5 -10  148.95    4.93
  -1   5 -10  149.93    4.89
  -4   5  10  149.19    4.83
  -4  -1 -10  140.92    4.65
  -1   5 -11  448.44   12.34
  -4   5  11  442.75   12.19
  -1   5 -11  451.40   12.35
  -4  -1 -11  435.14   12.06
  -1   5 -12  296.27    8.88
  -1   5 -12  292.21    8.82
  -4  -1 -12  303.92    8.63
  -4   5  12  294.94    8.66
  -4   5  13  256.25    7.84
  -1   5 -13  257.89    8.02
  -1   5 -13  275.54    8.24
  -4  -1 -13  260.97    7.85
  -4  -1 -14  107.75    4.15
  -1   5 -14  110.45    4.53
   5  -4 -15   22.79    2.46
  -1   5 -15   22.93    2.44
  -4  -1 -15   23.12    2.00
  -1   5 -16   56.93    3.28
  -4  -1 -16   54.67    2.88
   5  -4 -16   58.83    3.43
  -4  -1 -17   15.37    1.77
   5  -4 -17   13.32    2.24
  -1   5 -17   15.89    2.21
   5  -4 -18    8.18    2.01
  -1   5 -18    8.13    2.01
  -4  -1 -18    8.49    1.45
  -1   5 -19    3.06    1.75
  -4  -1 -19    4.01    1.18
   5  -4 -19    3.03    1.71
   5  -4 -20   11.62    1.74
  -1   5 -20   11.18    1.79
  -4  -1 -20   11.79    1.19
  -4  -1 -21   25.58    1.77
  -1   5 -21   30.14    1.90
   5  -4 -21   25.96    1.80
   5  -4 -22    1.95    0.72
  -1   5 -22    0.57    0.83
   5   0 -22   29.63    1.56
   5   0 -21   16.28    1.66
   5   0 -20   43.93    2.66
  -5   5 -20   36.53    2.30
   5   0 -19  173.43    6.03
  -5   5 -19  168.65    5.93
   5   0 -18   67.85    3.73
  -5   5 -18   67.60    3.66
  -5   5 -17    4.59    2.06
   5   0 -17    7.06    2.40
   5   0 -16   86.31    4.44
  -5   5 -16  101.43    4.64
  -5   5 -15  385.36   11.87
  -5   5 -15  382.75   11.38
   5   0 -15  392.95   11.71
  -5   5 -14  250.35    8.02
  -5   5 -14  256.96    8.53
  -5   5 -13  541.61   14.98
  -5   5 -12   12.71    1.79
  -5   0  11   80.47    3.12
  -5   5 -11   81.73    3.40
  -5   5 -10  331.35    9.41
   0   5  10  326.73    9.23
   0   5   9  543.13   14.51
  -5   5  -9  550.66   14.64
   0   5   8  264.99    9.66
   0  -5  -8  292.36   10.18
   5   0  -8  277.09    9.89
  -5   5  -8  290.87    8.08
  -5   0   8  276.04    9.43
   0   5   7  599.39   17.39
  -5   0   7  604.63   17.18
   0  -5  -7  613.76   17.97
   5   0  -7  591.68   17.57
   5   0  -6  459.93   14.05
   0   5   6  476.82   13.85
  -5   0   6  478.23   13.71
  -5   0   5   31.61    2.21
   5   0  -5   31.80    2.40
   0   5   5   33.81    2.26
  -5   0   4  474.85   13.31
   5   0  -4  467.15   13.62
   0   5   4  479.47   13.18
   0   5   3 2481.23   59.54
  -5   0   3 2352.64   59.87
   5   0  -3 2286.12   60.15
   5  -5   3 2382.58   60.43
   0   5   2  127.52    4.00
   5  -5   2  132.63    5.01
   5  -5   1  896.14   23.32
   5   0  -1  884.05   23.00
   0   5   1  866.43   21.71
   5  -5   0  443.75   12.51
   5   0   0  423.02   12.11
   5  -5  -1    1.68    1.29
   5   0   1    3.37    1.09
  -5   5   2 1889.17   46.98
   5  -5  -2 1814.04   47.17
   5   0   2 1820.25   46.73
  -5   5   3  525.53   15.14
   5  -5  -3  555.75   15.58
   5  -5  -4   18.10    2.10
   0  -5   4   15.20    0.81
   0  -5   4   18.42    0.77
  -5   5   4   18.04    1.89
  -5   5   5  413.18   11.77
   5  -5  -5  402.98   12.09
   0  -5   6  328.10    9.41
  -5   5   6  352.82   10.91
   5  -5  -6  324.37   11.06
   5  -5  -7    8.93    1.95
  -5   5   7   12.22    1.91
  -5   5   8  472.26   12.68
  -5   5   9  306.71    8.71
  -5   0  -9  305.67    8.57
   0   5  -9  307.65    8.70
  -5   0 -10   24.58    1.60
   0   5 -10   22.65    1.71
  -5   5  10   26.24    1.79
  -5   0 -11  636.21   16.84
   0   5 -11  622.86   16.99
  -5   5  11  644.46   16.93
  -5   0 -12  497.02   13.51
   0   5 -12  496.34   13.72
  -5   5  12  487.63   13.53
  -5   0 -13   91.22    3.76
   0   5 -13   99.40    4.07
  -5   5  13   96.71    3.80
   0   5 -14   94.40    4.10
  -5   5  14   96.56    3.82
  -5   0 -14   97.86    3.93
  -5   0 -15   70.94    3.35
   5  -5 -15   76.09    3.69
   0   5 -15   76.73    3.69
   5  -5 -16    6.08    1.88
   0   5 -16    7.89    1.99
  -5   0 -16    5.37    1.62
   0   5 -17   75.47    3.71
  -5   0 -17   70.68    3.32
   5  -5 -17   68.04    3.51
   0   5 -18  125.25    4.75
  -5   0 -18  118.25    4.35
   5  -5 -18  118.60    4.67
   5  -5 -19   42.89    2.52
   0   5 -19   40.57    2.58
  -5   0 -19   43.71    2.25
  -5   0 -20  153.18    4.80
   5  -5 -20  163.16    5.14
   0   5 -20  167.14    5.29
  -5   0 -21   -0.84    1.20
   0   5 -21    0.15    1.12
   5  -5 -21   -0.42    1.00
   0   5 -22    0.81    0.73
  -6   5 -22    7.52    0.80
  -6   5 -21   50.71    2.22
  -6   5 -21   54.63    2.24
   5   1 -21   53.07    2.40
   5   1 -20   77.80    3.37
  -6   5 -20   77.80    3.10
  -6   5 -20   75.03    3.39
  -6   5 -19   13.17    2.11
   5   1 -19   15.26    2.12
  -6   5 -19   13.45    1.89
  -6   5 -18   16.57    2.33
   5   1 -18   14.58    2.24
   5   1 -17   91.70    4.28
  -6   5 -17   83.23    4.38
   5   1 -16   47.36    3.32
  -6   5 -16   45.38    3.49
  -6   5 -15   17.35    2.85
   5   1 -15   11.92    2.29
   5   1 -14  183.31    6.54
  -6   1  12    4.45    1.31
  -6   1  11  429.64   10.97
  -6   5 -11  344.42   10.88
  -6   5 -10  109.95    4.09
   1   5  10  111.93    3.89
   1   5   9  414.16   11.35
  -6   5  -9  418.92   11.51
  -6   5  -8  548.67   14.40
   1   5   8  531.02   14.28
   1   5   8  532.75   16.31
  -6   5  -7  203.67    6.11
   5   1  -7  195.89    7.44
   1   5   7  207.42    7.51
  -6   1   7  196.07    7.40
   5   1  -6  606.85   17.26
   1   5   6  587.25   17.07
  -6   1   6  620.56   17.37
   1  -6  -6  609.99   18.18
   5  -6   5  377.00   11.52
  -6   1   5  391.53   11.50
   1   5   5  372.19   11.09
   5   1  -5  367.51   11.33
  -6   1   4  319.58    9.53
   5  -6   4  288.06    8.58
   1   5   4  299.11    8.89
   5   1  -4  305.97    9.32
   5  -6   4  322.09    9.67
   5  -6   3 1551.16   39.24
   5  -6   3 1576.33   39.87
   1   5   3 1516.12   38.78
   5   1  -3 1544.27   39.46
   5  -6   2  870.78   21.94
   5   1  -2  826.48   21.74
   1  -6  -2  840.88   21.28
   5  -6   2  878.81   22.23
   5  -6   1   38.33    2.39
   5   1  -1   42.88    2.30
   1  -6  -1   39.95    1.73
   5  -6   1   40.28    2.54
   5  -6   0  383.27   10.53
   5   1   0  380.75    9.92
   5  -6   0  377.78   10.43
   5  -6  -1  496.49   14.21
   5  -6  -1  488.11   14.05
   5   1   1  481.01   13.45
   5   1   2  246.80    7.89
  -6   5   2  256.04    8.40
   5  -6  -2  270.43    8.59
   5  -6  -2  271.82    8.71
   5  -6  -3  118.11    4.58
   5  -6  -3  107.56    4.31
  -6   5   3  104.30    4.13
   5  -6  -4  312.19    9.62
   5  -6  -4  295.99    9.60
   1  -6   4  272.97    7.38
   1  -6   4  270.75    7.49
  -6   5   4  289.67    9.24
   1  -6   5  420.77   11.17
   5  -6  -5  467.10   13.53
  -6   5   5  453.73   13.15
   1  -6   5  400.55   11.35
   5  -6  -6  175.52    7.07
  -6   5   6  160.74    6.57
   5   1   7  385.70   13.06
  -6   5   7  393.53   10.74
  -6   1  -8  207.37    6.14
  -6   5   8  208.73    6.31
  -6   5   8  206.88    6.09
  -6   1  -9  163.12    5.08
   1   5  -9  160.46    5.14
  -6   5   9  157.65    5.21
  -6   5   9  157.46    4.94
   1   5 -10  415.27   11.41
  -6   1 -10  402.55   11.28
  -6   5  10  410.38   11.42
   1   5 -11  154.77    5.16
  -6   1 -11  148.64    5.03
  -6   5  11  147.13    5.09
  -6   1 -12  596.82   15.94
  -6   5  12  577.40   15.94
   1   5 -12  593.15   16.09
   1   5 -13  210.84    6.86
  -6   5  13  207.12    6.67
  -6   1 -13  209.17    6.71
   1   5 -14   37.07    2.66
  -6   5  14   39.11    2.40
  -6   1 -14   37.30    2.48
   5  -6 -14   39.35    2.57
  -6   1 -15   34.55    2.40
   1   5 -15   33.79    2.64
   5  -6 -15   34.46    2.45
   1   5 -16   76.88    3.71
  -6   1 -16   72.73    3.41
   5  -6 -16   72.57    3.52
   5  -6 -17   13.00    1.80
   1   5 -17   14.77    2.01
  -6   1 -17   16.04    1.88
  -6   1 -18   28.26    2.04
   1   5 -18   32.70    2.39
   5  -6 -18   26.15    2.10
   1   5 -19   26.51    2.11
   5  -6 -19   25.98    1.82
  -6   1 -19   23.09    1.72
  -6   1 -20    5.73    1.07
   5  -6 -20    5.22    1.06
   1   5 -20    4.66    1.41
  -6   1 -20    5.99    1.73
  -6   1 -21    1.02    1.16
   1   5 -21    1.71    1.02
  -7   5 -21   28.17    1.58
  -7   5 -21   28.79    1.47
   5   2 -21   29.53    1.61
  -7   5 -20   36.54    2.04
   5   2 -20   41.21    2.27
  -7   5 -20   36.01    2.36
  -7   5 -19   48.14    2.99
  -7   5 -19   50.99    2.55
   5   2 -19   46.25    2.74
  -7   5 -18   47.81    2.79
   5   2 -18   49.68    2.98
  -7   5 -18   46.73    3.15
   5   2 -17  110.24    4.71
  -7   5 -17  117.55    5.21
  -7   5 -17  111.30    4.44
  -7   5 -16  139.54    5.76
   5   2 -16  130.69    5.30
  -7   5 -16  129.56    5.08
  -7   5 -15   36.39    2.86
   5   2 -15   40.54    2.98
  -7   5 -15   35.76    3.38
   5   2 -14   85.52    4.06
  -7   2  14   80.02    3.45
  -7   5 -14   84.71    3.90
  -7   2  13   24.92    2.03
   5   2 -13   26.23    2.42
  -7   2  12  102.57    4.03
  -7   2  11  185.83    6.02
  -7   2  10  184.71    5.96
  -7   2   9  272.85    7.78
   2   5   9  274.24    7.91
   2   5   8  402.86   11.20
  -7   2   8  417.41   11.13
  -7   2   7  194.67    5.74
   2   5   7  187.56    5.79
   5  -7   6  470.36   14.00
  -7   2   6  480.81   12.46
   2   5   6  461.58   12.50
  -7   5  -6  448.43   12.47
  -7   2   6  486.82   14.36
  -7   2   5  238.75    8.24
   2  -7  -5  246.67    8.23
   2  -7  -5  244.61    9.09
   5  -7   5  228.13    7.95
  -7   5  -5  241.73    6.80
   5  -7   4  637.04   17.42
   2  -7  -4  661.33   17.95
   5   2  -4  602.96   17.34
  -7   2   4  675.57   18.30
   5  -7   4  651.50   17.97
   5   2  -3  327.52    9.36
   2  -7  -3  341.99    9.69
   5  -7   3  317.32    9.71
   5  -7   3  335.91    9.97
   5   2  -2 2028.19   39.72
   2  -7  -2 2128.59   39.99
   5  -7   2 2097.36   40.86
   5  -7   2 2048.31   40.71
   5   2  -1 2001.24   49.99
   5  -7   1 1981.15   50.77
   5  -7   1 2014.45   51.04
   2  -7  -1 1964.22   49.82
   5   2   0  637.24   17.88
   5  -7   0  718.26   19.22
   2  -7   0  665.28   17.56
   5  -7   0  741.65   18.94
   5  -7  -1  496.67   13.83
   5   2   1  454.46   12.84
   5  -7  -1  496.58   14.18
  -7   5   1  480.75   14.01
   2  -7   1  451.19   12.21
   2  -7   2  178.20    5.35
   5  -7  -2  203.91    7.34
   5  -7  -2  208.37    7.04
   5   2   2  197.69    6.22
  -7   5   2  194.21    7.23
   5  -7  -3  224.81    7.74
  -7   5   3  237.78    8.19
   5  -7  -3  253.37    8.33
  -7   5   4  375.02   12.82
   5  -7  -4  407.77   12.66
   5  -7  -4  414.80   12.98
  -7   5   5  332.35    9.59
  -7   5   5  346.24   11.85
  -7   5   5  355.30    9.52
   5  -7  -5  351.29   11.77
   5  -7  -5  369.43   11.75
  -7   2  -6  412.07   10.88
   5   2   6  386.54   12.89
   5  -7  -6  415.01   13.42
  -7   5   6  397.74   10.91
  -7   2  -7  261.52    7.46
  -7   5   7  255.64    7.45
  -7   5   7  268.20    7.70
   5   2   7  255.87    9.60
  -7   2  -8   59.56    2.58
  -7   5   8   65.43    2.86
  -7   5   8   59.54    2.54
  -7   5   9   49.15    2.54
  -7   2  -9   47.48    2.35
  -7   5   9   44.02    2.19
  -7   2 -10  308.16    8.94
  -7   5  10  306.35    8.76
   2   5 -10  317.19    9.02
  -7   5  10  307.36    9.09
   2   5 -11  387.41   10.92
  -7   5  11  375.62   10.92
  -7   2 -11  383.49   10.83
  -7   5  12   24.94    2.09
  -7   2 -12   24.78    2.07
   2   5 -12   22.24    1.97
  -7   2 -13  201.64    6.43
   2   5 -13  187.54    6.43
  -7   5  13  193.90    6.38
   5  -7 -14  170.07    6.04
  -7   2 -14  190.22    6.19
  -7   5  14  183.66    6.15
   2   5 -14  193.69    6.39
   5  -7 -15   40.32    2.47
   2   5 -15   38.23    2.64
  -7   2 -15   43.63    2.66
  -7   5  15   42.25    2.50
   2   5 -16  174.60    6.18
   5  -7 -16  174.73    5.87
  -7   2 -16  187.69    6.06
   2   5 -17  147.63    5.19
  -7   2 -17  149.47    5.00
   2   5 -18   17.28    1.96
  -7   2 -18   19.37    1.78
   2   5 -19   28.35    2.03
  -7   2 -19   30.13    1.83
  -7   2 -19   27.37    2.49
  -7   2 -20    4.32    0.95
   2   5 -20    5.10    1.20
  -7   2 -20    4.68    1.65
   2   5 -21    7.02    0.87
  -7   2 -21    6.78    1.16
  -8   5 -21   32.07    1.34
   5   3 -20    1.84    1.01
  -8   5 -20    3.20    1.36
  -8   5 -20    2.22    0.99
  -8   5 -19   17.18    1.57
   5   3 -19   18.01    1.95
  -8   5 -19   13.60    2.07
  -8   5 -18   15.55    2.38
  -8   5 -18   15.00    1.81
   5   3 -18   14.37    1.88
  -8   5 -17   21.71    2.79
  -8   5 -17   23.71    2.23
   5   3 -17   23.20    2.21
  -8   5 -16   40.22    3.45
  -8   5 -16   43.37    2.82
   5   3 -16   45.33    2.92
  -8   5 -15   52.35    3.01
   5   3 -15   50.22    3.07
  -8   3  15   46.37    2.56
   5   3 -14   25.86    2.52
  -8   3  14   21.68    1.99
  -8   5 -14   20.99    2.33
   5   3 -13   86.54    3.95
  -8   3  13   87.72    3.83
  -8   5 -13   93.64    4.05
  -8   5 -12  134.59    4.97
   5   3 -12  134.93    5.09
  -8   3  12  135.51    5.00
  -8   5 -11   17.39    1.98
   5   3 -11   17.51    1.90
  -8   3  10  272.42    8.07
  -8   3  10  296.26    8.54
  -8   5 -10  273.44    8.40
  -8   5  -9  221.14    7.07
  -8   3   9  236.07    7.19
  -8   3   9  238.77    6.91
   3   5   9  223.01    6.85
   3   5   8   25.16    1.72
  -8   3   8   25.11    1.72
  -8   5  -8   28.85    1.98
   3   5   7  199.00    6.01
  -8   3   7  207.97    6.02
  -8   3   6  327.29    8.96
   3   5   6  307.76    8.91
   3   5   5  262.25    7.56
  -8   3   5  260.89    7.54
   3   5   4  346.60    9.56
  -8   3   4  355.56    9.58
  -8   3   3  837.95   20.91
   3   5   3  795.28   20.89
  -8   3   3  750.81   23.13
   5  -8   3  819.37   22.08
   5  -8   3  813.50   22.39
   5  -8   2   10.67    1.52
   3   5   2   11.46    1.27
  -8   3   2   10.32    1.81
   5  -8   2   10.23    1.60
   5  -8   1  235.39    8.41
   5  -8   1  234.52    7.86
  -8   3   1  240.47    6.82
  -8   3   1  226.77    8.41
   5  -8   0   36.39    2.50
  -8   5   0   37.80    2.80
  -8   3   0   38.80    2.76
   5  -8   0   37.34    2.86
  -8   5   1   15.64    1.34
   5  -8  -1   14.32    1.73
  -8   5   1   14.30    1.96
  -8   3  -1   14.78    1.80
   5  -8  -1   17.06    2.13
   5  -8  -2  476.16   14.74
  -8   5   2  483.38   12.48
  -8   5   2  472.33   14.69
  -8   3  -2  438.94   13.57
   5  -8  -2  441.80   13.88
  -8   5   3  174.74    7.41
  -8   3  -3  183.71    5.27
   5  -8  -3  175.12    7.32
   5  -8  -3  185.43    6.97
  -8   5   3  168.87    5.41
  -8   3  -4  214.14    6.08
  -8   5   4  204.93    6.25
  -8   5   4  205.57    6.16
   5  -8  -4  197.03    7.76
  -8   5   5  607.00   16.20
  -8   5   5  611.84   16.08
  -8   3  -5  612.74   16.00
   5  -8  -5  617.64   18.44
  -8   5   6  391.10   10.77
  -8   3  -6  393.17   10.72
  -8   5   7  105.09    3.93
  -8   3  -7  100.41    3.64
  -8   5   7  100.12    3.63
  -8   5   8   98.50    3.88
  -8   5   8   97.47    3.60
  -8   3  -8   98.22    3.62
  -8   5   9  333.00    9.65
  -8   3  -9  335.64    9.41
  -8   5   9  317.06    9.26
  -8   5  10    4.14    1.24
  -8   5  10    3.20    1.56
  -8   3 -10    4.01    1.43
  -8   5  11  368.76   10.69
   3   5 -11  360.31   10.50
  -8   3 -11  367.63   10.54
  -8   5  12  193.70    6.43
  -8   3 -12  190.82    6.38
   3   5 -12  195.50    6.41
   3   5 -13    3.76    1.53
  -8   3 -13    2.97    1.60
  -8   5  13    3.60    1.57
  -8   5  14   63.36    3.17
   3   5 -14   65.28    3.26
  -8   3 -14   60.16    3.17
   3   5 -15   54.09    3.00
  -8   5  15   55.40    2.87
  -8   3 -15   54.63    2.97
  -8   3 -16   74.78    3.43
   3   5 -16   84.21    3.61
  -8   3 -17   24.20    1.97
   3   5 -17   28.28    2.17
  -8   3 -18   54.94    3.33
   3   5 -18   45.21    2.49
  -8   3 -18   52.86    2.50
  -8   3 -19    4.11    1.84
  -8   3 -19    5.41    1.25
   3   5 -19    2.86    1.15
  -8   3 -20    4.36    1.42
  -8   3 -20    4.44    0.87
   3   5 -20    2.24    0.84
  -8   3 -21    5.29    0.96
  -9   5 -20    3.55    1.12
  -9   5 -20    3.66    0.74
   5   4 -19   12.46    1.21
  -9   5 -19   11.26    1.75
  -9   5 -19   13.75    1.29
   5   4 -18   29.04    1.92
  -9   5 -18   31.53    2.00
  -9   5 -18   33.35    2.73
  -9   5 -17   53.82    2.66
   5   4 -17   46.25    2.56
  -9   5 -16   66.70    3.17
   5   4 -16   60.69    3.09
  -9   5 -15   45.86    3.68
   5   4 -15   46.77    2.73
  -9   4  15   48.08    2.60
  -9   5 -15   47.16    2.79
  -9   5 -14   28.38    2.35
   5   4 -14   26.27    2.23
  -9   4  13   96.77    4.08
   5   4 -13   85.44    3.91
  -9   5 -13   93.96    3.98
  -9   4  12   79.83    3.73
   5   4 -12   80.60    3.58
  -9   5 -12   77.94    3.67
   5   4 -11    6.21    1.44
  -9   4  11    4.15    1.26
  -9   4  11    8.80    1.88
  -9   5 -11    6.32    1.72
  -9   4  10  105.77    4.37
  -9   5 -10  112.30    4.25
  -9   4  10  105.33    3.96
  -9   5  -9    5.99    1.41
  -9   4   9    6.37    1.36
  -9   4   9    5.41    1.67
  -9   5  -8   88.26    3.55
  -9   4   8   87.98    3.50
  -9   4   8   86.33    3.75
  -9   4   7   39.30    2.42
  -9   4   7   40.79    2.26
  -9   5  -7   35.15    2.20
  -9   5  -6   64.63    2.82
  -9   4   6   60.88    2.80
  -9   4   5    8.94    1.45
  -9   5  -5    7.91    1.29
  -9   4   4  238.74    7.00
  -9   5  -4  225.03    6.73
  -9   5  -4  239.02    6.87
  -9   5  -3  400.12   10.85
  -9   5  -2  284.05    8.05
   5  -9   2  284.06   10.01
  -9   4   2  285.26    8.19
  -9   5  -1  206.97    6.21
  -9   4   1  217.91    6.32
   5  -9   1  217.40    8.27
  -9   5   0   96.93    3.41
  -9   4   0   95.43    3.41
  -9   4   0   83.03    4.54
  -9   5   0   84.21    4.60
  -9   5   1  149.75    4.73
  -9   4  -1  144.01    4.67
  -9   5   1  137.23    6.33
  -9   5   2  266.83    7.76
  -9   5   2  266.93    7.77
  -9   4  -2  270.59    7.68
  -9   5   3  268.50    7.80
  -9   4  -3  266.24    7.61
  -9   5   4  200.73    6.21
  -9   5   4  192.93    6.13
  -9   4  -4  205.67    5.94
  -9   4  -4  199.15    5.99
  -9   5   5  226.09    7.00
  -9   5   5  227.62    6.89
  -9   4  -5  232.32    6.78
  -9   5   6  184.11    5.93
  -9   4  -6  194.58    5.91
  -9   4  -7   18.42    1.67
  -9   5   7   19.55    1.69
  -9   4  -8  103.67    3.94
  -9   5   8  107.08    4.26
  -9   5   8  106.94    3.99
  -9   5   9   30.62    2.03
  -9   4  -9   32.90    2.19
  -9   5   9   31.14    2.42
  -9   5  10   43.96    2.40
  -9   4 -10   44.52    2.60
  -9   5  10   45.67    2.85
  -9   5  11   96.74    3.77
  -9   4 -11  101.37    4.00
  -9   5  11   98.50    4.23
  -9   4 -12   42.22    2.71
  -9   5  12   41.94    2.75
  -9   5  13   62.35    3.25
   4   5 -13   57.93    3.02
  -9   4 -13   64.49    3.18
   4   5 -14   10.53    1.67
  -9   4 -14    8.60    1.83
  -9   5  14    5.50    1.58
  -9   4 -15   52.28    2.78
   4   5 -15   51.08    2.75
  -9   5  15   44.21    2.62
  -9   4 -16   96.51    3.80
   4   5 -16   87.40    3.66
  -9   5  16   90.65    3.58
  -9   4 -17   13.22    1.65
   4   5 -17    7.78    1.44
  -9   4 -18  103.03    3.60
   4   5 -18   95.25    3.47
  -9   4 -19    0.61    1.53
  -9   4 -19    0.91    0.93
  -9   4 -20    3.96    1.17
 -10   5   0  123.39    4.34
 -10   5  -1  232.97    7.08
 -10   5   1  245.02    7.21
 -10   5  -1  236.93    6.96
 -10   5  -2  252.49    7.55
 -10   5   2  264.66    7.72
 -10   5   3   34.39    2.20
 -10   5  -3   34.40    2.00
 -10   5  -4  246.34    7.17
 -10   5   4  243.54    7.45
 -10   5   4  244.73    7.50
 -10   5  -5  100.99    4.01
 -10   5   5  114.64    4.18
 -10   5   5  106.78    4.18
 -10   5  -5  111.87    3.93
 -10   5   6   35.52    2.45
 -10   5  -6   36.09    2.16
 -10   5   7   69.19    3.17
 -10   5  -7   70.20    3.09
 -10   5   8  233.78    7.47
 -10   5   8  237.90    7.77
 -10   5   9   42.26    2.55
 -10   5  -9   41.43    2.54
 -10   5   9   42.17    2.92
 -10   5  10  102.21    4.50
 -10   5  10  105.60    4.07
 -10   5 -10  109.21    4.29
 -10   5  11   28.67    2.12
 -10   5  11   34.91    2.72
 -10   5 -11   34.35    2.45
 -10   5  12   30.88    2.69
 -10   5 -12   35.10    2.48
 -10   5  13   79.20    3.81
 -10   5 -13   89.02    3.78
 -10   5 -14   64.22    3.85
 -10   5 -14   69.42    3.26
 -10   5  14   62.19    3.23
 -10   5 -15   19.77    2.72
 -10   5  15   18.35    1.90
 -10   5 -15   19.33    2.03
 -10   5 -16   76.17    3.98
 -10   5  16   73.96    3.49
 -10   5 -16   80.01    3.30
 -10   5 -17   58.17    2.61
 -10   5 -17   63.04    3.28
 -10   5 -18   28.37    1.65
   6  -3   0 1141.28   30.06
  -3   6   1  206.85    6.31
   6  -3  -1  195.62    6.95
   6  -3   1  206.55    7.00
   6  -3  -2  383.19   11.15
  -3   6   2  365.01   10.30
   6  -3  -3  491.45   13.91
  -3   6   3  481.47   13.08
   6  -3  -4  299.36   10.01
  -3  -3   4  306.71    8.25
  -3   6   4  318.41    9.48
  -3   6   5  964.26   24.95
  -3  -3   5  905.41   23.59
   6  -3  -5  929.06   25.61
  -3  -3   6  833.15   21.99
   6  -3  -6  826.94   23.87
  -3   6   6  885.56   23.41
  -3   6   7  450.54   13.36
   6  -3  -7  430.04   13.83
  -3   6  -7  426.48   11.62
  -3   6   7  406.27   11.37
  -3   6  -8  100.02    3.54
  -3   6   8  101.02    3.63
  -3   6  -8  106.37    3.88
  -3   6  -9  177.28    5.60
  -3   6   9  182.00    5.68
  -3   6  -9  183.05    5.91
  -3   6 -10  307.60    9.34
  -3   6  10  314.30    9.02
  -3   6 -10  318.65    9.07
  -3   6  11  325.87    9.43
  -3   6 -11  327.86    9.54
  -3   6 -11  331.46    9.82
  -3   6 -12    5.88    1.74
  -3   6 -12    6.91    1.58
  -3   6  12    6.75    1.39
  -3   6  13  123.49    4.46
  -3   6 -13  122.29    4.71
  -3   6 -13  116.91    4.81
  -3   6 -14  240.87    7.82
  -3   6 -14  247.71    8.04
  -3   6 -15   39.17    2.81
  -3   6 -15   39.88    2.83
  -3   6 -16   11.07    2.10
   6  -3 -16   13.06    2.42
  -3   6 -16   11.96    2.08
  -3   6 -17   11.61    1.89
  -3   6 -17   15.33    2.22
   6  -3 -17   10.10    2.32
  -3   6 -18   17.69    2.11
   6  -3 -18   14.11    2.36
   6  -3 -19   64.95    3.33
  -3   6 -19   66.79    3.21
  -3   6 -20    1.87    1.40
   6  -3 -20    0.35    1.56
  -3   6 -21   -0.24    1.08
   6  -3 -21   -0.81    1.20
  -3   6 -22   28.12    1.31
   6  -3 -22   22.97    1.33
   6  -2 -22    9.39    1.01
  -4   6 -22   11.02    0.93
  -4   6 -21    1.13    1.04
   6  -2 -21    0.78    1.22
  -4   6 -20   91.79    3.55
   6  -2 -20   89.25    3.77
   6  -2 -19    8.08    2.07
  -4   6 -19    9.14    1.81
  -4   6 -18    5.15    1.78
  -4   6 -18    5.48    1.75
   6  -2 -18    6.38    2.30
  -4   6 -17   93.78    4.28
  -4   6 -17   95.94    4.23
  -4   6 -16    2.44    1.99
  -4   6 -16    3.14    1.94
  -4   6 -15    9.01    2.30
  -4   6 -15    7.06    1.86
  -4   6 -14  202.08    6.68
  -4   6 -14  188.86    6.95
  -4   6 -13    1.42    1.85
  -4   6 -13    0.35    1.57
  -4   6 -12   21.50    2.25
  -4   6 -12   21.77    2.01
  -2   6  12   20.86    1.77
  -4   6 -11   81.83    3.41
  -2   6  11   77.22    3.26
  -4   6 -11   83.69    3.78
  -2   6  10   10.16    1.39
  -4   6 -10   10.29    1.44
  -4   6 -10   13.28    1.80
  -4   6  -9   63.34    3.07
  -2   6   9   67.47    2.82
  -4   6  -9   63.78    2.76
  -2   6   8  687.20   17.83
  -4   6  -8  689.46   18.13
  -4   6  -8  652.51   17.73
  -2  -4  -8  700.31   19.76
  -2   6   8  700.34   19.98
   6  -2  -7   32.39    2.94
  -2   6   7   31.59    1.83
  -2   6   7   36.47    2.67
  -4  -2   7   32.49    2.17
  -4   6  -7   31.83    2.04
  -2   6   6   86.13    4.02
  -4  -2   6   78.99    3.37
   6  -2  -6   86.74    4.51
  -2   6   5  974.75   25.11
   6  -2  -5  901.03   25.63
  -4  -2   5  926.11   24.23
  -4  -2   4   78.19    2.96
  -2   6   4   78.03    3.39
   6  -2  -4   79.30    3.97
  -2   6   3  784.87   19.37
   6  -2  -3  768.51   20.27
   6  -2  -2 1049.23   28.61
  -2   6   2 1095.62   27.64
   6  -2  -1   20.36    1.99
   6  -2   0  381.30   11.38
   6  -2   1  191.00    6.62
  -4   6   2  367.05   10.52
   6  -2   2  349.23   10.79
   6  -2   3   99.49    4.38
   6  -4  -3   89.52    4.44
   6  -4  -4  239.52    8.32
  -4   6   4  231.35    7.73
  -4   6   5   77.33    3.71
  -2  -4   5   67.02    2.27
   6  -4  -5   76.63    4.05
  -4   6   6  196.33    7.36
   6  -4  -6  214.21    8.05
  -4   6   7   23.86    2.39
  -4   6   7   26.51    1.65
  -2   6  -8   51.59    2.50
  -4   6   8   49.56    2.33
  -2   6  -9   83.57    3.21
  -2   6  -9   81.27    3.38
  -4   6   9   85.64    3.27
  -2   6 -10  351.64    9.94
  -4   6  10  350.03    9.93
  -2   6 -10  351.50   10.12
  -2   6 -11   83.32    3.64
  -2   6 -11   82.76    3.49
  -4   6  11   86.84    3.48
  -2   6 -12  116.36    4.44
  -4   6  12  111.76    4.23
  -2   6 -12  112.27    4.34
  -4   6  13  378.10   10.73
  -2   6 -13  369.60   10.91
  -2   6 -13  373.04   10.98
  -2   6 -14    3.84    1.62
  -2   6 -14    4.19    1.71
  -4  -2 -14    1.65    1.20
  -4   6  14    2.85    1.25
  -2   6 -15   22.36    2.13
  -4  -2 -15   18.05    1.69
  -2   6 -15   18.46    2.19
   6  -4 -16   73.80    3.84
  -2   6 -16   73.38    3.65
  -2   6 -16   68.79    3.33
  -2   6 -17    0.91    1.73
   6  -4 -17    2.34    2.04
  -2   6 -18   16.74    2.09
   6  -4 -18   15.70    2.13
   6  -4 -19   47.51    2.85
  -2   6 -19   52.53    2.77
   6  -4 -20    3.03    1.62
  -2   6 -20    4.09    1.71
  -2   6 -21    4.90    1.13
   6  -4 -21    7.05    1.25
  -5   6 -22    8.67    0.82
  -5   6 -21   51.53    2.21
  -5   6 -20   78.03    3.20
  -5   6 -19   16.27    1.97
  -5   6 -19   17.65    1.95
   6  -1 -19   13.51    2.21
  -5   6 -18   16.49    2.18
  -5   6 -18   18.63    2.15
   6  -1 -18   14.81    2.54
  -5   6 -17   91.46    4.07
   6  -1 -17   88.71    4.41
  -5   6 -17   86.88    4.24
  -5   6 -16   39.58    2.92
  -5   6 -16   35.62    3.16
   6  -1 -16   43.65    3.30
  -5   6 -15    8.09    2.33
   6  -1 -15   10.09    2.28
  -5   6 -15   13.54    2.09
  -5   6 -14  157.33    5.75
  -5   6 -14  159.72    6.24
  -5   6 -13   71.04    3.91
  -5   6 -13   68.01    3.39
  -1   6  12    8.12    1.36
  -5   6 -12    5.34    1.86
  -5   6 -12    8.05    1.74
  -5   6 -11  406.73   11.54
  -1   6  11  407.34   11.42
  -5   6 -11  414.35   12.07
  -5   6 -10  103.25    4.35
  -5   6 -10  106.23    3.99
  -1   6  10  110.57    3.96
  -1   6   9  403.65   11.44
  -5   6  -9  416.54   11.49
  -5   6  -9  434.52   11.96
  -5   6  -8  553.27   14.96
  -1  -5  -8  609.32   17.51
  -1   6   8  540.46   14.97
  -5   6  -8  583.07   15.36
  -1   6   8  568.65   16.99
  -1   6   7  208.42    7.49
  -5   6  -7  206.03    6.02
  -5  -1   7  202.62    7.00
  -1   6   7  195.25    6.02
   6  -1  -7  194.00    7.81
  -1   6   6  654.75   17.14
  -5  -1   6  643.39   16.69
  -1   6   5  374.31   11.22
   6  -1  -5  371.92   11.88
  -5  -1   5  387.77   11.04
  -5  -1   4  317.57    9.14
  -1   6   4  318.22    9.27
   6  -1  -4  303.30    9.92
   6  -5   4  296.64    9.96
  -1   6   3 1530.06   38.41
   6  -1  -3 1512.59   39.46
   6  -5   3 1496.53   39.57
   6  -5   2  889.30   24.56
   6  -1  -2  937.47   24.52
  -1   6   2  906.38   23.21
   6  -1  -1   43.51    2.66
   6  -5   1   43.53    2.83
   6  -5   0  333.49   10.57
   6  -1   0  350.66   10.40
   6  -1   1  471.04   13.56
   6  -5  -1  471.84   13.91
  -5   6   2  273.25    8.59
   6  -5  -2  281.47    9.08
   6  -1   2  259.62    8.56
   6  -1   3  113.80    4.81
  -5   6   3  120.29    4.84
  -5   6   4  313.38    9.86
   6  -5  -4  305.79   10.26
   6  -5  -5  446.63   14.02
  -5   6   5  449.61   13.52
  -5   6   6  157.51    6.27
   6  -5  -6  146.28    6.57
  -5   6   7  345.44    9.60
  -5   6   8  212.80    6.40
  -5   6   8  219.18    6.60
  -1   6  -8  230.52    6.70
  -1   6  -9  165.59    5.43
  -1   6  -9  171.05    5.30
  -5   6   9  168.30    5.16
  -5   6   9  164.28    5.39
  -5  -1 -10  428.34   11.59
  -1   6 -10  426.14   11.79
  -1   6 -10  435.10   11.94
  -5   6  10  421.74   11.88
  -5  -1 -11  148.35    4.86
  -1   6 -11  153.61    5.12
  -1   6 -11  146.02    5.16
  -5   6  11  153.01    5.13
  -1   6 -12  573.44   15.56
  -1   6 -12  562.20   15.53
  -5  -1 -12  571.20   15.27
  -5   6  12  567.75   15.49
  -5  -1 -13  205.06    6.35
  -1   6 -13  197.20    6.54
  -1   6 -13  205.71    6.66
  -5   6  13  196.11    6.46
  -5  -1 -14   41.49    2.35
  -5   6  14   39.89    2.42
  -1   6 -14   34.71    2.63
  -1   6 -15   42.07    2.77
  -5  -1 -15   36.77    2.31
  -1   6 -16   75.48    3.68
  -5  -1 -16   76.40    3.24
   6  -5 -16   76.73    3.83
  -5  -1 -17   12.40    1.51
  -1   6 -17   15.60    2.11
   6  -5 -17   15.55    2.18
   6  -5 -18   23.77    2.31
  -1   6 -18   27.16    2.28
  -5  -1 -18   23.70    1.68
  -1   6 -19   24.65    2.03
   6  -5 -19   21.54    2.02
  -1   6 -20    7.37    1.44
   6  -5 -20    7.50    1.46
  -5  -1 -21    3.31    1.17
   6  -5 -21    2.35    0.88
  -1   6 -21    2.77    1.01
   6   0 -21   81.61    3.02
  -6   6 -20   27.47    2.13
  -6   6 -20   28.54    2.00
  -6   6 -19   13.49    1.87
   6   0 -19   10.86    1.95
  -6   6 -19    8.42    1.85
   6   0 -18  158.06    5.84
  -6   6 -18  158.41    5.54
  -6   6 -18  167.54    5.98
  -6   6 -17   -2.03    2.13
  -6   6 -17   -0.52    1.90
   6   0 -17    0.10    2.14
  -6   6 -16   13.14    2.31
  -6   6 -16   12.97    2.56
   6   0 -16   14.80    2.50
  -6   6 -15  310.61    9.71
   6   0 -15  329.64   10.07
  -6   6 -15  318.08   10.24
  -6   6 -14  155.68    5.73
  -6   6 -14  157.66    6.23
  -6   6 -13  193.08    6.58
  -6   6 -13  198.72    7.18
  -6   0  12  268.44    8.13
  -6   6 -12  285.59    8.49
  -6   6 -12  276.84    8.97
  -6   6 -11   50.88    3.24
   0   6  11   52.68    2.57
  -6   6 -11   55.12    2.83
   0   6  10   12.73    1.45
  -6   6 -10   14.38    2.16
  -6   6 -10    8.85    1.61
  -6   6  -9  848.76   21.88
   0   6   9  828.34   21.83
  -6   6  -8   12.60    1.89
  -6   0   8   13.41    1.22
   0   6   8   12.23    1.39
  -6   6  -8   12.38    1.42
   6   0  -7  127.84    5.74
  -6   6  -7  132.36    4.61
  -6   0   7  128.15    5.29
  -6   0   7  123.53    4.01
  -6   6  -7  125.12    4.23
   0   6   7  121.73    4.21
  -6   6  -6 1096.23   27.98
  -6   0   6 1105.94   29.36
   6   0  -6 1109.60   30.01
   0   6   6 1077.29   28.02
  -6   6  -6 1111.04   28.31
   0   6   6 1130.70   29.36
   6  -6   5  139.50    5.82
   6   0  -5  140.92    5.75
  -6   0   5  140.71    5.35
   0   6   5  144.14    5.19
   0   6   4    1.25    0.77
   6   0  -4    0.25    1.11
   6  -6   4    1.65    1.31
   6   0  -3 1599.02   41.05
   0   6   3 1571.45   39.81
   6  -6   3 1598.48   41.33
   6  -6   2  484.04   13.69
   6   0  -2  505.82   13.45
   6   0  -1  484.25   13.82
   6  -6   1  478.20   14.15
   6  -6   0 1123.11   30.18
   6   0   0 1140.86   29.74
   6   0   1    2.80    1.15
   6  -6  -1    1.19    1.47
   6  -6  -2 1051.08   28.26
  -6   6   2 1051.01   27.86
   6   0   2 1029.11   27.61
   6   0   3 2524.25   64.58
  -6   6   3 2563.99   64.89
   6  -6  -3 2568.72   65.35
   6  -6  -4  775.11   21.78
  -6   6   4  753.98   21.28
  -6   6   5   12.32    1.76
   6  -6  -5   14.47    2.17
  -6   6   6  488.89   13.57
  -6   6   6  528.04   13.52
  -6   6   7   14.55    1.36
  -6   6   7   16.20    1.50
  -6   6   8    6.79    1.16
  -6   6   8    7.93    1.40
  -6   0  -8    7.01    1.00
  -6   6   9  469.04   12.78
  -6   6   9  475.24   13.01
  -6   0  -9  478.05   12.74
  -6   0 -10   18.09    1.53
  -6   6  10   15.42    1.41
  -6   6  10   17.61    1.75
   0   6 -10   17.49    1.58
   0   6 -11  130.19    4.49
  -6   0 -11  120.40    4.26
  -6   6  11  119.43    4.47
   0   6 -12  660.77   17.85
  -6   6  12  671.41   17.89
  -6   0 -12  657.74   17.64
  -6   6  13   18.64    1.88
  -6   0 -13   18.14    1.79
   0   6 -13   16.90    1.89
   0   6 -14   30.14    2.35
  -6   0 -14   25.59    2.10
  -6   6  14   24.16    2.05
  -6   6  15  127.59    4.73
   6  -6 -15  130.59    5.01
   0   6 -15  138.59    5.06
  -6   0 -15  125.11    4.63
  -6   0 -16   15.13    1.80
   6  -6 -16   13.96    2.03
   0   6 -16   17.52    2.15
   6  -6 -17   87.75    3.91
  -6   0 -17   94.27    3.60
   0   6 -17   95.42    4.03
  -6   0 -18  105.05    3.71
   6  -6 -18  102.57    4.08
   0   6 -18  105.30    4.15
  -6   0 -19   13.80    1.25
   0   6 -19   18.83    1.77
   6  -6 -19   17.93    1.68
   6  -6 -20   17.25    1.40
   0   6 -20   21.03    1.61
   0   6 -21   34.56    1.62
  -6   0 -21   35.54    1.90
   6   1 -21   54.05    2.19
   6   1 -20   15.27    1.63
  -7   6 -20   17.35    1.72
   6   1 -19   61.10    3.03
  -7   6 -19   63.89    3.18
  -7   6 -18   87.79    4.17
   6   1 -18   91.78    3.99
   6   1 -17   47.04    3.03
  -7   6 -17   44.14    3.24
   6   1 -16  166.81    6.33
  -7   6 -16  182.49    6.80
  -7   6 -15    9.53    2.62
   6   1 -15   15.50    2.46
  -7   6 -14   20.97    2.43
   6   1 -14   25.84    2.62
  -7   6 -14   22.33    2.87
  -7   6 -13  119.71    4.86
  -7   6 -13  128.28    5.57
  -7   1  13  124.48    4.52
  -7   1  12   86.63    3.63
  -7   6 -12   89.37    3.90
  -7   1  11  100.58    3.87
  -7   6 -11   92.21    3.93
   1   6  11   95.46    3.67
  -7   6 -10  352.21   10.15
   1   6  10  352.22   10.01
  -7   6  -9  449.88   12.29
  -7   1   9  428.26   11.92
   1   6   9  451.24   12.18
   1   6   8   15.62    1.49
  -7   6  -8   15.01    1.62
  -7   1   8   15.36    1.37
   1   6   8   15.12    1.36
  -7   6  -7  526.93   14.28
  -7   1   7  517.11   13.74
   1   6   7  508.02   13.88
   1   6   7  516.67   13.76
  -7   6  -7  518.42   13.87
   1   6   6 1027.71   26.74
  -7   6  -6 1045.30   27.05
  -7   1   6 1079.24   28.50
   1   6   6 1061.09   26.67
  -7   1   6 1038.82   26.61
  -7   6  -6 1039.03   26.71
  -7   6  -5   78.61    3.21
  -7   1   5   80.36    3.96
  -7   1   5   81.92    2.97
   1   6   5   80.02    3.00
   1   6   5   76.70    3.04
   6  -7   5   82.48    4.17
  -7   6  -5   78.19    2.96
   6  -7   4  377.59   11.93
  -7   6  -4  388.93   10.36
   6   1  -4  398.51   11.65
   1   6   4  377.59   10.46
  -7   1   4  375.62   10.32
   6   1  -3  404.39   12.07
   6  -7   3  417.96   12.59
   6   1  -2 1703.14   44.06
   6  -7   2 1741.30   44.71
   6   1  -1  745.91   20.81
   6  -7   1  771.71   21.44
   6  -7   1  807.02   21.28
   6  -7   0  619.34   17.39
   6   1   0  573.75   16.56
   6  -7   0  622.95   17.26
   6  -7  -1  551.86   16.40
   6  -7  -1  559.90   16.39
   6   1   1  571.54   15.72
   6  -7  -2  281.70    9.34
   6   1   2  260.25    8.46
  -7   6   3  321.66   10.43
   6   1   3  313.99    9.89
   6  -7  -3  329.51   10.74
  -7   6   4   19.92    1.52
   6  -7  -4   18.59    2.32
  -7   6   4   21.39    2.24
  -7   6   4   20.59    1.46
  -7   6   5  710.28   18.79
  -7   6   5  729.75   18.69
  -7   6   6  118.66    3.99
  -7   1  -6  120.28    3.85
  -7   6   7   29.17    1.82
  -7   1  -7   30.36    1.66
  -7   6   8  242.24    7.10
  -7   1  -8  237.49    7.00
  -7   6   8  243.09    7.34
  -7   6   9  147.53    4.91
  -7   1  -9  152.12    4.91
  -7   6   9  153.82    5.20
  -7   6  10  195.56    6.35
  -7   1 -10  197.05    6.07
  -7   6  10  190.75    6.01
  -7   6  11  151.76    5.42
   1   6 -11  151.16    5.21
  -7   1 -11  162.54    5.22
  -7   1 -12  275.01    8.26
   1   6 -12  276.19    8.39
  -7   6  12  281.34    8.51
  -7   1 -13  246.54    7.47
   1   6 -13  231.15    7.53
  -7   6  13  243.50    7.64
  -7   1 -14  128.70    4.55
   1   6 -14  120.41    4.62
  -7   6  15   92.40    3.83
   1   6 -15   95.37    4.07
  -7   1 -15   90.33    3.85
   6  -7 -15   93.55    3.94
  -7   1 -16  195.10    6.13
   6  -7 -16  182.03    6.21
   1   6 -16  186.74    6.30
   1   6 -17  107.73    4.18
  -7   1 -17  107.27    3.91
   6  -7 -17   97.56    3.98
  -7   1 -18    8.91    1.31
   6  -7 -18   10.60    1.40
   1   6 -18    9.52    1.63
  -7   1 -19    8.69    1.14
   1   6 -19    8.66    1.39
   1   6 -20   25.55    1.56
  -7   1 -20   31.30    2.14
  -7   1 -21    6.00    1.08
  -8   6 -21   13.98    0.91
  -8   6 -20    1.62    0.98
   6   2 -20    2.40    1.04
  -8   6 -20    1.72    1.24
  -8   6 -19   46.49    2.26
   6   2 -19   43.46    2.39
  -8   6 -19   41.68    2.61
  -8   6 -18    4.07    1.60
   6   2 -18    3.43    1.61
  -8   6 -18    3.78    1.99
  -8   6 -17   21.73    2.82
  -8   6 -17   17.36    2.12
   6   2 -17   18.45    2.12
  -8   6 -16  125.18    5.37
   6   2 -16  121.25    4.88
  -8   6 -15   15.06    3.05
   6   2 -15   21.75    2.43
   6   2 -14   22.79    2.50
  -8   2  14   23.59    1.99
  -8   2  13  167.78    5.79
   6   2 -13  171.32    6.10
  -8   6 -12   90.21    4.75
  -8   2  12   94.37    3.93
  -8   6 -11   52.42    3.40
  -8   2  11   51.22    2.86
  -8   2  10  440.46   12.40
   2   6  10  456.61   12.60
  -8   2  10  479.07   12.87
  -8   2   9  161.01    5.12
  -8   6  -9  149.35    5.28
   2   6   9  159.12    5.21
  -8   6  -8   82.37    3.41
  -8   2   8   87.50    3.29
   2   6   8   83.11    3.35
  -8   6  -7  613.56   16.30
  -8   2   7  590.07   16.16
  -8   6  -7  618.93   16.71
   2   6   7  626.83   16.30
  -8   6  -6  128.78    4.33
  -8   6  -6  116.03    4.51
  -8   2   6  127.28    4.29
   2   6   6  132.52    4.38
   2   6   5   31.24    1.85
  -8   2   5   30.13    1.84
   2   6   5   27.88    1.82
   6  -8   5   26.76    2.36
  -8   6  -5   28.68    1.77
  -8   6  -5   30.22    2.02
   6  -8   4  531.38   16.02
   2   6   4  534.50   14.52
  -8   2   4  545.48   14.48
  -8   6  -4  536.60   14.63
   2   6   4  552.37   14.53
  -8   6  -4  560.86   14.47
   6  -8   3  187.12    6.95
   2   6   3  189.09    5.72
   2   6   3  187.66    5.72
  -8   2   3  185.66    5.64
  -8   6  -3  182.70    5.58
   2   6   2   60.73    2.62
   6  -8   2   61.14    3.45
   6  -8   2   62.72    3.39
  -8   6  -2   61.24    2.44
   2   6   1  127.86    4.27
   6  -8   1  128.66    5.46
  -8   2   1  130.69    4.22
   6  -8   1  141.00    5.59
   6  -8   0   23.54    2.26
  -8   6   0   23.89    1.57
   2   6   0   24.37    1.62
  -8   2   0   23.94    1.56
   6  -8   0   22.57    2.18
   6  -8  -1   18.93    2.15
   6  -8  -1   18.36    2.06
  -8   2  -1   23.59    1.52
  -8   6   1   20.09    1.47
  -8   6   2  456.43   12.13
  -8   6   2  447.12   12.09
  -8   2  -2  451.88   12.00
   6  -8  -2  454.95   14.26
   6  -8  -2  434.88   13.84
  -8   6   3    0.17    0.99
   6  -8  -3    0.17    1.26
  -8   6   4    9.11    1.30
  -8   2  -4    8.68    1.05
  -8   6   4    8.70    1.32
  -8   6   5 1028.15   26.13
  -8   6   5 1005.97   26.24
  -8   2  -5 1022.77   25.94
  -8   6   6  197.53    6.16
  -8   2  -6  207.53    6.06
  -8   2  -7    4.96    1.10
  -8   6   7    4.20    1.20
  -8   2  -8  311.20    8.71
  -8   6   8  302.77    9.01
  -8   6   8  300.12    8.75
  -8   6   9   46.02    2.66
  -8   6   9   47.16    2.38
  -8   2  -9   45.25    2.33
  -8   6  10   29.63    2.30
  -8   2 -10   32.65    2.11
  -8   6  10   31.94    2.11
  -8   6  11  275.69    8.25
  -8   2 -11  284.87    8.42
  -8   6  11  284.73    8.67
  -8   2 -12   39.79    2.42
  -8   6  12   40.28    2.68
   2   6 -13   43.92    2.61
  -8   2 -13   44.07    2.61
  -8   2 -14  110.32    4.17
   2   6 -14   98.37    4.11
  -8   6  14  107.57    4.30
   2   6 -15   20.35    2.07
  -8   6  15   23.88    2.08
  -8   2 -15   25.20    2.04
  -8   2 -16   72.91    3.19
   2   6 -16   70.38    3.27
  -8   6  16   73.45    3.20
  -8   2 -17   92.58    3.53
   2   6 -17   91.87    3.67
  -8   2 -18    7.78    1.27
   2   6 -18   10.34    1.47
  -8   2 -19    2.04    1.71
   2   6 -19    1.09    1.05
  -8   2 -19    0.29    0.90
  -8   2 -20   26.39    1.89
  -9   6 -20   10.47    1.22
  -9   6 -20   11.64    0.96
  -9   6 -19   21.29    1.92
  -9   6 -19   22.35    1.55
   6   3 -19   19.84    1.47
   6   3 -18   -0.73    1.22
  -9   6 -18    3.57    2.03
  -9   6 -18    1.72    1.32
  -9   6 -17   65.80    3.03
   6   3 -17   61.27    2.99
  -9   6 -17   68.43    3.75
   6   3 -16   61.19    3.12
  -9   6 -16   58.79    3.04
  -9   6 -15   19.30    2.16
   6   3 -15   16.93    2.13
  -9   3  15   15.18    1.74
  -9   6 -14   21.99    3.03
   6   3 -14   25.37    2.40
  -9   3  14   26.55    2.13
  -9   6 -14   25.38    2.42
  -9   6 -13  148.93    5.49
  -9   3  13  150.70    5.45
   6   3 -13  149.23    5.51
  -9   6 -13  155.63    6.29
  -9   3  12   37.18    2.69
  -9   6 -12   32.36    3.00
  -9   6 -12   31.29    2.47
   6   3 -12   35.33    2.56
   6   3 -11   89.49    3.83
  -9   3  11   90.66    3.91
  -9   6 -11   84.69    4.35
  -9   3  11   81.73    3.36
  -9   6 -10  100.34    4.71
  -9   3  10  108.75    4.00
  -9   3  10  113.10    4.45
   3   6  10  104.26    3.96
  -9   3   9   86.57    3.80
  -9   3   9   83.36    3.42
   3   6   9   85.41    3.44
  -9   6  -8  217.47    7.23
  -9   3   8  217.75    6.67
   3   6   8  213.02    6.66
  -9   3   7  194.77    6.18
   3   6   7  204.21    6.23
  -9   6  -7  189.11    6.54
   3   6   6  148.01    5.04
  -9   3   6  156.17    5.08
  -9   6  -6  148.54    5.29
  -9   6  -5  158.82    5.47
  -9   3   5  168.10    5.36
   3   6   5  166.26    5.37
  -9   6  -4  428.21   11.62
  -9   6  -4  422.10   11.73
   3   6   4  437.79   11.90
  -9   6  -4  431.34   11.98
  -9   3   4  444.96   11.91
  -9   6  -3  378.22   10.34
  -9   6  -3  373.07   10.28
  -9   6  -2  239.47    6.90
  -9   3   2  231.71    6.99
  -9   6  -1  224.53    6.49
  -9   3   1  211.30    6.49
   6  -9   1  211.35    8.11
  -9   6   0  138.69    4.44
  -9   3   0  126.36    5.88
  -9   3   0  138.43    4.52
  -9   6   0  137.95    4.51
  -9   3  -1  119.59    4.07
  -9   6   1  116.16    4.08
  -9   6   1  121.92    4.07
  -9   6   2  518.20   13.56
  -9   6   2  496.92   13.51
  -9   3  -2  494.72   13.42
  -9   6   3   47.23    2.36
  -9   3  -3   45.54    2.18
  -9   6   4   55.94    2.73
  -9   6   4   62.75    2.77
  -9   3  -4   59.03    2.49
  -9   6   5  645.91   17.03
  -9   6   5  618.52   17.11
  -9   3  -5  654.54   16.83
  -9   6   6   51.58    2.69
  -9   6   6   45.21    2.44
  -9   3  -6   46.65    2.30
  -9   3  -7   77.42    3.15
  -9   6   7   78.22    3.27
  -9   6   8    9.32    1.53
  -9   3  -8    8.32    1.42
  -9   6   8    8.29    1.75
  -9   6   9   18.65    1.76
  -9   3  -9   18.98    1.78
  -9   6   9   18.43    2.07
  -9   6  10    8.74    1.53
  -9   3 -10   10.04    1.59
  -9   6  10   10.55    1.95
  -9   6  11  120.58    4.83
  -9   6  11  119.83    4.44
  -9   3 -11  128.47    4.59
  -9   3 -12  138.05    4.95
  -9   6  12  134.82    5.26
  -9   3 -13   28.55    2.15
  -9   6  13   25.80    2.42
  -9   3 -14   34.18    2.31
  -9   6  14   35.43    2.47
  -9   3 -15   44.73    2.58
  -9   6  15   43.26    2.61
  -9   3 -16   93.60    3.62
  -9   6  16   91.04    3.65
  -9   3 -17   52.75    2.51
  -9   3 -18   23.84    1.58
  -9   3 -19    3.94    0.88
  -9   3 -19    7.54    1.65
  -9   3 -20   17.26    1.43
 -10   6 -19    3.72    1.33
 -10   6 -19    3.83    0.84
 -10   6 -18    3.76    1.16
 -10   6 -17   80.56    3.21
 -10   6 -16   18.84    2.54
 -10   4  16   16.89    1.58
   6   4 -16   22.17    1.77
 -10   6 -16   20.42    1.95
 -10   6 -15   17.28    2.66
 -10   6 -15   14.20    1.99
 -10   4  15   15.84    1.78
   6   4 -15   15.09    1.71
   6   4 -14  105.39    4.24
 -10   4  14  109.41    4.36
 -10   6 -14  118.06    4.50
 -10   6 -14  113.13    5.16
 -10   6 -13   12.72    2.62
 -10   4  13   12.40    1.97
 -10   6 -13   12.41    1.93
   6   4 -13    8.63    1.62
 -10   6 -12   49.19    3.55
 -10   6 -12   48.89    2.97
 -10   4  12   51.74    3.12
 -10   6 -11   75.45    4.07
 -10   6 -11   81.20    3.63
 -10   4  11   74.62    3.82
 -10   4  11   74.97    3.26
 -10   6 -10   45.69    3.22
 -10   4  10   45.08    2.99
 -10   4  10   44.93    2.55
 -10   6  -9  192.77    6.76
 -10   4   9  182.18    6.07
 -10   6  -9  185.92    6.26
 -10   4   9  190.79    6.47
 -10   4   8  262.83    8.36
 -10   4   8  270.01    8.09
 -10   6  -8  264.25    8.52
 -10   6  -8  266.81    8.12
 -10   4   7   37.78    2.43
 -10   6  -7   39.51    2.42
 -10   6  -7   40.38    2.62
 -10   6  -6   97.54    4.00
 -10   4   6  103.34    3.92
 -10   6  -6   88.91    3.65
 -10   6  -5   70.64    3.24
 -10   4   5   77.52    3.34
 -10   6  -4  133.71    4.43
 -10   4   4  133.23    4.73
 -10   6  -3    8.14    1.26
 -10   6  -2  409.54   11.42
 -10   4   2  421.18   11.59
 -10   6  -1   79.33    3.24
 -10   4   1   83.43    3.35
 -10   6   0   15.64    1.61
 -10   4   0   11.84    1.55
 -10   6   0   13.89    1.41
 -10   6   1  422.16   11.82
 -10   6   1  446.58   11.92
 -10   4  -1  421.10   11.80
 -10   6   2   14.31    1.61
 -10   4  -2   16.18    1.55
 -10   6   2   14.19    1.72
 -10   4  -3   11.75    1.35
 -10   6   3    8.06    1.48
 -10   6   4  279.26    8.37
 -10   6   4  268.32    8.26
 -10   4  -4  287.04    8.04
 -10   6   5   14.62    1.84
 -10   6   5   14.57    1.78
 -10   6   6    4.33    1.54
 -10   6   6    6.15    1.65
 -10   4  -6    5.78    1.31
 -10   6   7  235.58    7.30
 -10   4  -7  233.48    7.12
 -10   6   8  104.52    4.16
 -10   4  -8  108.37    4.07
 -10   6   9   21.08    1.93
 -10   6   9   19.44    2.30
 -10   4  -9   25.86    1.96
 -10   6  10  135.57    5.31
 -10   6  10  134.68    4.84
 -10   4 -10  136.39    4.92
 -10   6  11   64.35    3.43
 -10   4 -11   61.87    3.16
 -10   6  11   64.11    3.05
 -10   6  12   30.15    2.75
 -10   4 -12   31.86    2.32
 -10   6  12   31.54    2.09
 -10   4 -13   61.85    3.05
 -10   6  13   55.64    3.20
 -10   4 -14    6.69    1.67
 -10   6  14    5.37    1.74
 -10   6  15   17.45    1.93
 -10   4 -15   17.31    1.90
 -10   4 -16   92.79    4.21
 -10   4 -16   89.99    3.49
 -10   6  16   90.31    3.53
 -10   4 -17    2.21    1.90
 -10   4 -17    3.15    1.14
 -10   4 -18    9.12    1.83
 -10   4 -18    8.95    1.11
 -11   6 -19    5.46    0.88
 -11   6 -18    9.61    1.47
 -11   6 -17   84.15    3.58
 -11   6 -16    2.51    1.22
 -11   6 -16    3.87    1.93
 -11   5  16    1.50    1.14
 -11   6 -15   86.52    3.48
 -11   6 -15   89.04    4.10
 -11   5  15   85.83    3.50
 -11   6 -14   49.70    2.69
 -11   6 -14   44.34    3.23
 -11   5  14   41.55    2.70
 -11   6 -13   12.07    1.92
 -11   6 -13   11.44    2.37
 -11   5  13   13.97    2.07
 -11   5  12   40.57    2.88
 -11   6 -12   45.17    2.72
 -11   5  12   42.02    2.35
 -11   6 -12   43.52    3.37
 -11   5  11   52.76    3.23
 -11   5  11   48.98    2.64
 -11   6 -11   47.36    3.31
 -11   6 -11   51.02    2.90
 -11   5  10   67.92    3.32
 -11   5  10   75.82    3.92
 -11   6 -10   76.35    3.94
 -11   6 -10   75.79    3.51
 -11   5   9  144.57    5.58
 -11   5   9  141.13    5.19
 -11   6  -9  145.46    5.23
 -11   6  -9  153.26    5.68
 -11   5   8  175.34    6.03
 -11   6  -8  183.38    5.89
 -11   6  -8  170.19    6.22
 -11   5   7   47.24    2.77
 -11   6  -7   46.62    2.63
 -11   5   6   27.23    2.28
 -11   5   6   24.66    2.33
 -11   6  -6   26.81    2.18
 -11   5   5   79.98    3.69
 -11   5   5   84.38    3.71
 -11   6  -4    1.74    1.18
 -11   5   4    0.25    1.47
 -11   5   4    0.08    1.69
 -11   5   3  139.20    5.04
 -11   6  -3  141.09    4.79
 -11   5   2  346.12   10.33
 -11   6  -2  360.45   10.23
 -11   5   2  374.81   10.45
 -11   5   1    8.73    1.44
 -11   5   1    9.24    1.69
 -11   6  -1    6.74    1.50
 -11   6  -1    7.42    1.26
 -11   6   0  240.67    7.39
 -11   5   0  251.43    7.44
 -11   6   0  244.53    7.54
 -11   5   0  250.25    7.54
 -11   6   1  255.59    7.78
 -11   5  -1  257.79    7.63
 -11   6   1  260.59    7.89
 -11   5  -1  260.69    7.79
 -11   6   2  206.86    6.67
 -11   6   2  212.09    6.75
 -11   5  -2  209.59    6.56
 -11   6   3   51.25    2.82
 -11   5  -3   56.80    2.69
 -11   6   4   61.75    3.16
 -11   5  -4   64.89    2.85
 -11   6   5   56.42    3.01
 -11   6   5   50.87    2.97
 -11   5  -6   38.18    2.41
 -11   6   6   35.50    2.63
 -11   6   6   33.74    2.49
 -11   5  -7  186.23    6.49
 -11   6   7  200.15    6.79
 -11   6   7  199.58    6.48
 -11   6   8  310.08    9.40
 -11   5  -8  318.80    9.27
 -11   6   9  243.70    8.05
 -11   6   9  242.88    7.70
 -11   5  -9  248.53    7.61
 -11   5 -10   23.62    2.12
 -11   6  10   22.81    2.14
 -11   6  10   27.29    2.64
 -11   5 -11   10.81    2.26
 -11   6  11   10.87    1.65
 -11   6  11    9.77    2.13
 -11   5 -11   10.92    1.74
 -11   5 -12   22.55    2.09
 -11   5 -12   16.47    2.52
 -11   6  12   18.31    1.78
 -11   6  12   21.24    2.46
 -11   5 -13   30.67    2.77
 -11   5 -13   35.60    2.39
 -11   6  13   31.20    2.47
 -11   6  14   38.21    2.58
 -11   5 -14   41.55    2.39
 -11   5 -14   36.72    2.90
 -11   6  15   43.74    2.45
 -11   5 -15   45.42    2.99
 -11   5 -15   41.39    2.31
 -11   5 -16   42.92    2.15
 -11   5 -16   42.40    2.74
 -11   6  16   40.73    2.17
 -11   5 -17   34.33    2.36
 -11   5 -18   14.91    1.55
 -11   5 -19   16.17    1.22
 -12   6   0  194.02    6.37
 -12   6   0  190.40    6.17
 -12   6  -1  105.16    3.97
 -12   6   1  103.18    4.13
 -12   6   1  106.93    4.36
 -12   6  -1  113.57    4.25
 -12   6   2   36.89    2.44
 -12   6  -2   36.32    2.32
 -12   6   2   34.84    2.62
 -12   6   3  265.99    8.36
 -12   6   3  270.43    8.42
 -12   6  -3  273.73    8.09
 -12   6  -4   27.95    1.98
 -12   6   4   26.94    2.46
 -12   6   5   56.12    3.28
 -12   6   5   65.84    3.41
 -12   6   6  146.72    5.61
 -12   6   6  147.94    5.48
 -12   6  -7    5.00    1.53
 -12   6   7    8.34    2.03
 -12   6   7    4.69    2.10
 -12   6   8   46.41    2.97
 -12   6  -8   48.08    2.80
 -12   6   9  171.54    5.91
 -12   6  -9  163.39    5.95
 -12   6  10   62.49    3.65
 -12   6  10   59.34    3.16
 -12   6  11   43.35    3.25
 -12   6  11   43.26    2.60
 -12   6 -11   43.88    3.06
 -12   6  12   62.99    2.99
 -12   6 -12   67.67    3.61
 -12   6 -13   10.18    2.13
 -12   6  13   11.36    2.04
 -12   6 -14    1.92    1.74
 -12   6  14    1.94    1.57
 -12   6 -15   82.11    3.63
 -12   6  15   84.46    3.33
 -12   6  16   23.76    1.58
 -12   6 -16   25.57    2.04
 -12   6 -17    0.73    1.15
   7  -3 -21   28.20    1.74
  -4   7 -21   28.20    1.52
  -4   7 -20   15.01    1.53
   7  -3 -20   14.35    1.81
  -4   7 -19   26.48    2.03
   7  -3 -19   23.04    2.27
   7  -3 -18   69.44    3.59
  -4   7 -18   71.78    3.31
  -4   7 -17  143.40    5.19
  -4   7 -17  140.47    5.28
   7  -3 -17  143.24    5.59
  -4   7 -16   40.67    2.78
  -4   7 -16   37.20    2.83
   7  -3 -16   33.70    3.05
  -4   7 -15   60.67    3.29
  -4   7 -15   66.61    3.66
  -4   7 -14  200.14    6.54
  -3   7  14  184.48    6.20
  -4   7 -14  188.60    6.85
  -4   7 -13   48.15    2.74
  -3   7  13   43.15    2.58
  -4   7 -13   46.76    3.20
  -4   7 -12   80.33    3.58
  -3   7  12   78.26    3.49
  -4   7 -12   83.30    3.98
  -4   7 -11  106.71    4.48
  -4   7 -11   96.03    3.91
  -3   7  11  103.87    4.01
  -4   7 -10  168.62    5.59
  -4   7 -10  178.87    6.06
  -3   7  10  170.87    5.69
  -4   7  -9  179.87    5.65
  -3   7   9  171.79    5.72
  -4   7  -9  185.04    6.08
  -3   7   9  178.46    5.49
  -3   7   8   97.48    3.72
  -4   7  -8  100.50    3.56
  -4   7  -8   96.57    3.94
  -3   7   8  105.46    3.58
  -3   7   7  202.11    7.58
  -4   7  -7  201.18    5.91
  -3   7   7  191.84    6.07
  -3   7   7  199.59    5.95
  -4   7  -7  202.87    6.36
  -3   7   6  339.92   11.12
  -4   7  -6  376.55   10.11
  -3   7   6  350.26    9.84
  -3   7   6  348.42    9.72
  -3   7   5  463.93   13.25
   7  -3  -5  458.58   14.19
  -4   7  -5  451.36   12.19
  -3   7   5  426.26   11.94
   7  -3  -4  622.95   18.46
  -3   7   4  632.70   17.45
   7  -3  -3  950.13   26.06
  -3   7   3  938.08   24.85
  -3   7   2  668.14   16.90
   7  -3  -2  634.89   18.05
   7  -3  -1 1454.19   38.59
   7  -4   1 1479.65   38.58
   7  -4   0 1657.56   44.40
   7  -3   0 1754.69   44.48
   7  -4  -1  974.89   25.66
   7  -3   1  893.86   25.29
  -4   7   2  467.78   13.18
   7  -4  -2  480.21   14.15
   7  -3   2  438.77   13.74
  -4   7   3  272.34    8.50
   7  -3   3  252.06    8.97
   7  -4  -3  280.20    9.46
   7  -3   4  288.20    9.84
   7  -4  -4  276.88   10.04
  -4   7   5  107.94    4.78
   7  -4  -5  118.78    5.57
  -4   7   6   29.04    2.43
  -3   7  -6   28.10    1.96
  -4   7   6   22.63    1.67
  -4   7   6   27.29    1.62
  -4   7   7   87.55    3.41
  -3   7  -7   93.97    3.63
  -4   7   7   93.90    3.32
  -3   7  -8   58.00    2.47
  -3   7  -8   59.20    2.85
  -4   7   8   59.18    2.70
  -4   7   8   55.64    2.45
  -3   7  -9  106.51    3.75
  -3   7  -9  108.50    4.18
  -4   7   9  102.68    3.68
  -4   7   9  102.14    3.94
  -3   7 -10  198.18    6.20
  -3   7 -10  197.59    6.57
  -4   7  10  197.05    6.34
  -3   7 -11  586.03   16.13
  -3   7 -11  584.07   15.76
  -4   7  11  576.97   15.83
  -4   7  12  107.15    4.31
  -3   7 -12  120.18    4.41
  -3   7 -12  113.32    4.64
  -4   7  13   72.81    3.35
  -3   7 -13   72.82    3.44
  -3   7 -13   73.89    3.68
  -3   7 -14  161.74    5.96
  -3   7 -14  159.86    5.72
  -4   7  14  162.86    5.59
  -3   7 -15   94.76    4.20
  -3   7 -15   95.98    4.10
  -3   7 -16  107.83    4.41
   7  -4 -16  109.91    4.78
   7  -4 -17  132.07    5.27
  -3   7 -17  123.75    4.80
  -3   7 -18   48.55    2.70
   7  -4 -18   48.29    3.05
  -3   7 -19   32.40    2.11
   7  -4 -19   29.67    2.38
  -3   7 -20   25.98    1.80
   7  -4 -20   21.18    1.85
   7  -4 -21   10.47    1.23
  -3   7 -21    9.81    1.08
  -5   7 -21   32.93    1.61
  -5   7 -20   42.64    2.16
  -5   7 -19   48.12    2.53
  -5   7 -18   51.35    2.82
  -5   7 -18   47.99    2.94
  -5   7 -17  122.32    4.96
  -5   7 -17  123.30    4.78
  -5   7 -16  126.59    4.93
  -5   7 -16  129.43    5.32
  -5   7 -15   35.89    2.67
  -5   7 -15   39.47    3.10
  -5   7 -14   70.50    3.61
  -5   7 -14   76.02    4.02
  -5   7 -13   18.86    2.54
  -2   7  13   19.39    1.83
  -5   7 -13   19.43    2.16
  -5   7 -12  102.65    4.11
  -2   7  12  101.49    3.97
  -5   7 -12   91.12    4.45
  -5   7 -11  185.16    6.08
  -2   7  11  182.93    6.06
  -5   7 -11  185.04    6.57
  -5   7 -10  193.20    6.10
  -2   7  10  187.51    6.11
  -5   7 -10  189.06    6.54
  -5   7  -9  288.82    8.22
  -2   7   9  282.82    8.29
  -2   7   9  276.86    7.99
  -5   7  -9  270.22    8.61
  -5   7  -8  410.40   11.31
  -2   7   8  425.16   11.47
  -5   7  -8  405.08   11.73
  -2   7   8  406.57   11.19
  -5   7  -7  197.49    5.81
  -2   7   7  191.74    5.97
  -5   7  -7  185.90    6.20
  -2   7   7  191.56    5.78
  -2   7   6  485.61   14.09
  -5   7  -6  467.72   12.54
   7  -2  -6  468.74   14.94
  -2   7   6  469.25   12.60
  -2   7   6  473.98   12.75
   7  -5   5  225.21    8.48
  -2   7   5  239.86    7.76
  -2   7   5  235.31    6.86
  -5   7  -5  237.85    7.04
   7  -2  -5  217.16    8.47
   7  -2  -4  624.97   18.60
  -2   7   4  663.30   17.54
   7  -5   4  616.47   18.56
  -2   7   3  356.42   10.19
   7  -5   3  349.61   11.42
   7  -2  -3  358.73   11.46
  -2   7   2 2237.72   54.21
   7  -2  -2 2083.93   55.63
   7  -5   2 2091.33   55.70
   7  -2  -1 1947.61   50.58
   7  -5   1 1970.48   50.75
   7  -5   0  640.08   19.00
   7  -2   0  698.78   19.05
   7  -2   1  479.26   14.20
  -5   7   2  193.98    6.63
   7  -2   2  183.97    6.93
   7  -2   3  250.76    8.76
  -5   7   3  265.23    8.52
   7  -2   4  361.29   11.91
  -5   7   4  400.55   11.85
  -5   7   5  366.06   10.06
  -5   7   5  377.87   11.70
  -5   7   6  406.97   12.67
  -5   7   6  403.67   10.79
  -5   7   6  383.74   10.85
  -5   7   7  241.67    6.99
  -5   7   7  236.38    7.12
  -5   7   8   67.93    2.77
  -2   7  -8   68.69    3.05
  -5   7   8   66.50    2.95
  -2   7  -9   52.39    2.69
  -5   7   9   49.34    2.34
  -2   7  -9   48.09    2.31
  -5   7   9   51.79    2.62
  -2   7 -10  311.76    9.38
  -2   7 -10  318.19    9.08
  -5   7  10  322.98    9.29
  -5   7  10  312.23    8.93
  -2   7 -11  366.69   10.51
  -5   7  11  361.15   10.62
  -2   7 -11  379.92   10.78
  -5   7  12   23.67    2.09
  -2   7 -12   22.54    1.90
  -2   7 -12   22.08    2.03
  -5   7  13  208.10    6.79
  -2   7 -13  210.43    6.82
  -5   7  14  175.72    6.06
  -2   7 -14  185.03    6.19
  -5   7  15   39.07    2.45
  -2   7 -15   45.87    2.79
   7  -5 -16  208.63    7.11
  -2   7 -16  207.37    6.82
  -2   7 -17  141.35    5.25
   7  -5 -17  156.38    5.68
   7  -5 -18   21.38    2.28
  -2   7 -18   19.00    1.97
   7  -5 -19   26.28    2.17
  -2   7 -19   31.73    2.06
  -2   7 -20    4.54    1.22
   7  -5 -20    2.68    1.29
  -5  -2 -21    8.08    1.11
  -2   7 -21    7.79    0.90
   7  -5 -21    7.16    0.95
  -6   7 -21   60.17    2.17
   7  -1 -21   55.88    2.35
  -6   7 -20   15.38    1.44
   7  -1 -20   16.66    1.72
  -6   7 -19   62.55    2.83
   7  -1 -19   64.86    3.21
  -6   7 -18  103.19    3.98
   7  -1 -18   91.98    4.30
  -6   7 -18  104.11    4.38
  -6   7 -17   51.17    2.93
   7  -1 -17   48.81    3.38
  -6   7 -17   42.09    3.08
   7  -1 -16  173.88    6.45
  -6   7 -16  169.10    5.95
  -6   7 -16  166.86    6.41
  -6   7 -15   15.14    2.20
  -6   7 -15   14.78    2.73
  -6   7 -14   26.15    2.94
  -6   7 -14   23.37    2.41
  -6   7 -13  110.65    4.51
  -1   7  13  113.14    4.26
  -6   7 -13  118.18    5.26
  -6  -1  12  104.01    3.86
  -6   7 -12   97.64    4.20
  -1   7  12  106.62    4.03
  -6   7 -12   93.43    4.63
  -6   7 -11   99.79    4.55
  -6   7 -11   98.83    4.03
  -1   7  11   95.66    3.86
  -6   7 -10  358.94   10.30
  -6   7 -10  356.62   10.83
  -1   7  10  360.31   10.31
  -6   7  -9  457.27   12.61
  -1   7   9  457.69   12.66
  -1   7   8   14.71    1.37
  -1   7   8   13.71    1.56
  -6  -1   8   15.63    1.30
  -6   7  -8   18.66    1.63
  -6   7  -7  520.07   13.60
  -6  -1   7  501.95   13.38
  -1   7   7  504.33   13.73
  -1   7   7  494.05   13.50
  -6   7  -7  511.84   14.03
  -6   7  -6 1059.61   27.07
  -1   7   6 1042.02   27.23
  -6   7  -6 1062.55   27.50
   7  -1  -6 1045.31   29.46
  -1   7   6 1079.82   27.11
  -6  -1   6 1071.36   26.97
  -6   7  -5   80.14    3.00
   7  -1  -5   90.25    4.56
  -1   7   5   84.47    3.09
  -1   7   5   85.29    3.23
  -6   7  -5   87.06    3.44
  -6   7  -4  406.38   10.85
  -1   7   4  372.34   10.62
   7  -1  -4  384.03   12.29
   7  -6   4  395.97   12.50
  -1   7   4  391.07   10.56
   7  -6   3  418.91   13.10
   7  -1  -3  416.59   12.89
   7  -1  -2 1815.23   46.86
   7  -6   2 1792.43   47.09
   7  -1  -1  740.39   20.96
   7  -6   1  765.73   21.33
   7  -6   0  619.78   17.90
   7  -1   0  607.86   17.47
   7  -6  -1  545.13   16.40
   7  -1   1  559.25   16.03
   7  -6  -2  269.82    9.48
   7  -1   2  272.21    9.04
  -6   7   3  336.10   10.56
   7  -6  -3  346.41   11.25
   7  -1   3  310.46   10.48
  -6   7   4   18.80    1.48
   7  -6  -4   24.77    2.59
  -6   7   4   21.63    2.11
  -6   7   4   21.83    1.54
  -6   7   5  699.63   18.07
  -6   7   5  658.38   19.80
  -6   7   5  700.09   18.14
  -6   7   6  119.98    4.06
  -6   7   7   28.28    1.78
  -6   7   7   24.00    1.84
  -6   7   8  232.36    7.15
  -6   7   8  236.56    6.98
  -6   7   9  162.95    5.21
  -6   7   9  160.98    5.45
  -1   7 -10  195.96    6.09
  -6   7  10  191.11    6.04
  -6   7  10  202.31    6.40
  -1   7 -11  162.16    5.32
  -6   7  11  155.03    5.51
  -1   7 -12  283.18    8.47
  -6   7  12  280.26    8.64
  -6   7  13  242.67    7.64
  -1   7 -13  240.99    7.58
  -1   7 -14  116.16    4.52
  -6   7  14  117.50    4.56
  -6   7  15  100.80    4.12
  -1   7 -15  107.65    4.30
   7  -6 -16  190.53    6.65
  -1   7 -16  200.43    6.49
  -1   7 -17  101.88    4.04
   7  -6 -17  100.82    4.21
  -1   7 -18    9.45    1.62
   7  -6 -18    7.63    1.67
   7  -6 -19    7.74    1.46
  -1   7 -19    8.57    1.38
  -1   7 -20   24.90    1.54
   7  -6 -20   22.22    1.57
  -6  -1 -21    5.78    1.02
  -7   7 -21   10.81    0.93
   7   0 -21   11.21    1.04
  -7   7 -20   42.46    2.01
   7   0 -20   43.82    2.22
   7   0 -19  105.03    4.12
  -7   7 -19  109.02    3.89
  -7   7 -19  113.77    4.25
  -7   7 -18  150.16    5.26
   7   0 -18  155.91    5.59
  -7   7 -18  169.42    5.83
  -7   7 -17  123.94    5.17
  -7   7 -17  126.02    4.67
   7   0 -17  120.51    5.00
   7   0 -16   53.62    3.34
  -7   7 -16   44.67    3.43
  -7   7 -16   49.02    2.98
  -7   7 -15   95.31    4.17
   7   0 -15   94.82    4.42
  -7   7 -15   92.35    4.77
  -7   7 -14  367.54   10.91
  -7   7 -14  369.16   11.70
  -7   7 -13   45.48    2.88
  -7   7 -13   43.45    3.52
  -7   0  13   39.40    2.37
  -7   7 -12  273.00    8.26
  -7   0  12  258.81    7.98
   0   7  12  262.17    7.98
  -7   7 -12  260.42    8.86
  -7   7 -11  186.04    6.42
   0   7  11  208.29    6.44
   0   7  10  198.69    6.34
  -7   7 -10  194.45    6.35
  -7   7  -9  425.00   12.07
  -7   0   9  426.96   11.79
   0   7   9  449.45   12.13
  -7   7  -9  433.62   12.63
  -7   7  -8  278.86    8.54
  -7   0   8  300.91    8.43
   0   7   8  294.53    8.66
   0   7   8  291.90    8.46
  -7   0   7  866.23   22.45
   0   7   7  866.34   22.68
   0   7   7  867.87   22.55
  -7   7  -7  893.06   23.10
  -7   7  -7  869.58   22.57
   0   7   6  450.80   12.10
  -7   0   6  429.60   11.97
  -7   7  -6  448.93   12.08
   0   7   6  445.66   12.21
  -7   7  -6  454.33   12.52
  -7   0   5  591.38   15.80
  -7   7  -5  603.43   15.84
   0   7   5  596.22   16.00
   0   7   5  610.73   15.93
  -7   7  -5  617.53   16.26
   0   7   4  652.62   17.38
   7   0  -4  640.79   18.95
  -7   7  -4  662.44   17.20
  -7   0   4  672.55   17.22
  -7   7  -4  665.80   17.54
   0   7   4  662.74   17.32
   7  -7   3   88.53    4.43
  -7   7  -3   84.85    2.97
   0   7   3   81.38    3.08
   7  -7   2  928.12   25.09
   0   7   2  894.15   23.08
   0   7   2  896.34   23.03
   7   0  -2  885.39   24.52
   7   0  -1  508.57   14.99
   7  -7   1  512.21   15.49
   0   7   1  517.01   13.67
   7  -7   0  589.31   17.45
   7   0   0  602.86   16.82
   0   7   0  578.61   15.39
   7   0   1  611.23   17.94
   7  -7  -1  663.71   18.77
  -7   7   1  637.62   16.58
  -7   7   2   18.90    1.47
   7   0   2   14.92    1.82
   7  -7  -2   15.77    2.12
  -7   7   3 2575.54   62.46
   7  -7  -3 2366.63   64.78
   7   0   3 2463.32   64.05
  -7   7   4 1851.53   45.95
   7   0   4 1717.00   47.48
   0   7  -4 1869.22   45.97
   0   7  -4 1787.71   45.78
  -7   7   4 1870.59   45.90
  -7   7   5   40.82    2.17
  -7   7   5   43.51    2.17
   0   7  -5   37.77    2.08
   0   7  -6  226.07    6.69
  -7   0  -6  222.00    6.33
  -7   7   6  219.35    6.67
  -7   7   7  325.24    9.50
  -7   0  -7  323.50    9.02
   0   7  -7  337.92    9.39
  -7   7   7  335.97    9.38
  -7   7   8  316.33    9.10
  -7   0  -8  318.93    8.82
  -7   7   8  316.99    9.29
  -7   7   9  249.65    7.46
  -7   0  -9  248.03    7.23
  -7   7   9  250.97    7.71
  -7   7  10  138.04    4.86
  -7   7  10  147.60    5.20
  -7   0 -10  149.29    4.77
  -7   7  11   62.44    2.82
  -7   7  11   69.32    3.32
  -7   0 -11   64.80    2.81
   0   7 -12  130.23    4.76
  -7   7  12  139.78    5.13
  -7   0 -12  137.49    4.67
   0   7 -13  232.17    7.41
  -7   0 -13  242.76    7.27
  -7   7  13  239.75    7.63
  -7   0 -14  152.97    5.07
   0   7 -14  151.17    5.32
  -7   7  14  146.01    5.38
  -7   0 -15  274.00    7.94
   0   7 -15  260.43    8.15
   7  -7 -15  262.18    8.31
  -7   7  15  271.10    8.22
  -7   0 -16  204.80    6.21
   7  -7 -16  200.97    6.65
   0   7 -16  205.74    6.53
  -7   7  16  195.13    6.38
   7  -7 -17    1.57    1.41
   0   7 -17    3.82    1.43
   0   7 -18   42.11    2.27
   7  -7 -18   40.02    2.27
   0   7 -19   88.17    3.11
   7  -7 -19   80.95    3.05
  -7   0 -20    0.48    1.35
  -7   0 -21   44.49    1.91
   7   1 -20   47.77    2.09
   7   1 -19   39.85    2.31
  -8   7 -19   43.19    2.54
  -8   7 -18   37.31    2.32
   7   1 -18   39.70    2.52
  -8   7 -18   36.91    2.73
   7   1 -17   21.06    2.28
  -8   7 -17   20.17    2.01
  -8   7 -17   21.89    2.59
  -8   7 -16  112.28    5.07
   7   1 -16  118.56    4.77
  -8   7 -16  103.45    4.40
  -8   7 -15   27.70    3.05
  -8   7 -15   25.71    2.38
   7   1 -15   25.35    2.65
   7   1 -14   38.16    2.84
  -8   7 -14   34.01    3.50
  -8   7 -14   33.77    2.69
  -8   1  14   32.67    2.23
  -8   1  13   78.26    3.44
  -8   7 -13   72.06    3.68
  -8   1  12   39.41    2.54
   1   7  12   42.62    2.38
  -8   7 -12   41.01    2.74
  -8   1  11  101.50    4.05
  -8   7 -11   95.09    4.00
   1   7  11   93.82    3.81
  -8   7 -11   97.65    4.67
  -8   1  10  537.08   14.78
  -8   7 -10  543.77   15.13
   1   7  10  577.65   15.12
  -8   7 -10  556.71   15.82
  -8   7  -9   67.68    3.52
  -8   1   9   61.19    2.80
   1   7   9   64.82    2.98
  -8   7  -9   66.88    3.07
  -8   1   8  553.74   14.81
  -8   7  -8  559.66   15.50
   1   7   8  558.80   15.01
   1   7   8  556.39   14.87
  -8   7  -8  532.60   14.94
   1   7   7  598.93   15.73
  -8   7  -7  581.02   15.74
   1   7   7  601.49   15.84
  -8   1   7  570.55   15.64
  -8   7  -7  588.42   16.21
  -8   1   6   74.43    3.03
  -8   7  -6   73.48    3.02
   1   7   6   75.42    3.14
   1   7   6   76.58    3.09
  -8   7  -6   67.95    3.35
  -8   1   5  806.25   20.93
  -8   7  -5  814.97   20.93
   1   7   5  794.40   21.03
   1   7   5  815.13   21.00
  -8   7  -5  794.79   21.24
  -8   1   4  198.97    6.13
  -8   7  -4  213.67    6.15
   1   7   4  199.37    6.23
   1   7   4  201.39    6.20
  -8   7  -4  201.58    6.36
   1   7   3  193.98    6.00
  -8   7  -3  193.61    5.79
  -8   7  -3  198.67    6.09
  -8   7  -3  200.10    5.83
  -8   1   3  203.02    5.95
   1   7   3  180.44    5.93
  -8   7  -2  103.81    3.55
   7  -8   2  103.61    4.97
   1   7   2   99.89    3.67
  -8   7  -1  133.11    4.33
   7  -8   1  130.56    5.85
   1   7   1  136.30    4.47
  -8   1   1  135.46    4.36
  -8   7   0  235.28    6.75
  -8   1   0  237.33    6.69
   1   7   0  227.61    6.78
   7  -8   0  210.15    8.27
   1   7   0  226.94    6.78
  -8   7   1  117.60    3.91
   1   7  -1  112.29    3.89
  -8   1  -1  114.30    3.81
  -8   7   1  114.29    3.85
   7  -8  -1  101.26    5.19
   1   7  -1  117.20    3.97
  -8   7   2  374.49   10.12
   1   7  -2  365.76   10.14
  -8   1  -2  365.40    9.96
   1   7  -2  368.48   10.12
  -8   7   2  356.48   10.08
  -8   7   3  117.86    4.06
   1   7  -3  117.69    4.00
  -8   1  -3  112.79    3.80
   1   7  -4  422.69   11.62
  -8   7   4  432.10   11.70
  -8   1  -4  423.67   11.41
  -8   7   4  430.14   11.73
  -8   7   5  677.58   17.98
  -8   7   5  686.25   17.91
  -8   1  -5  679.86   17.55
  -8   1  -5  684.88   17.57
   1   7  -5  663.59   17.80
  -8   7   6   72.09    3.10
  -8   7   6   65.90    2.92
  -8   1  -6   65.52    2.61
  -8   7   7  133.99    4.59
  -8   1  -7  131.23    4.29
  -8   7   8  424.17   12.13
  -8   7   8  428.23   11.93
  -8   1  -8  434.88   11.69
  -8   7   9    3.54    1.34
  -8   7   9    3.75    1.57
  -8   1  -9    4.10    1.15
  -8   7  10  202.70    6.57
  -8   1 -10  209.80    6.44
  -8   7  10  216.36    6.97
  -8   7  11   86.26    3.49
  -8   1 -11   88.57    3.51
  -8   7  11   88.44    3.88
  -8   7  12    9.48    1.91
  -8   1 -12   14.32    1.60
  -8   1 -13  225.67    6.99
  -8   7  13  227.78    7.40
  -8   1 -14   71.59    3.18
  -8   7  14   76.53    3.57
  -8   1 -15  249.15    7.24
  -8   7  15  242.48    7.50
   1   7 -15  233.50    7.25
   7  -8 -15  222.96    7.30
  -8   1 -16   43.23    2.23
   1   7 -16   38.65    2.27
  -8   7  16   35.98    2.30
   7  -8 -16   34.45    2.22
   1   7 -17   19.43    1.66
  -8   1 -17   21.10    1.68
  -8   1 -20   14.48    1.50
  -9   7 -20   31.91    1.43
   7   2 -19   32.69    1.80
  -9   7 -19   38.78    2.19
   7   2 -18   51.53    2.59
  -9   7 -18   56.56    3.02
   7   2 -17   25.99    2.12
  -9   7 -17   30.43    2.72
   7   2 -16   91.56    4.00
  -9   2  15   45.28    2.49
   7   2 -15   52.81    3.06
  -9   2  14   41.03    2.51
   7   2 -14   40.72    2.81
  -9   2  13  184.44    6.08
   7   2 -13  174.28    6.21
  -9   7 -13  192.91    7.02
  -9   2  12   65.29    3.34
  -9   7 -12   63.73    3.35
  -9   7 -12   67.29    4.11
  -9   2  11  132.19    5.04
  -9   7 -11  127.31    5.52
  -9   2  11  124.37    4.47
   2   7  11  133.97    4.69
  -9   7 -11  128.16    4.89
   2   7  10   48.87    2.59
  -9   2  10   47.86    2.83
  -9   2  10   52.91    2.60
  -9   7 -10   48.28    3.37
  -9   7 -10   45.91    2.78
  -9   2   9  284.85    8.43
   2   7   9  290.05    8.58
  -9   7  -9  281.27    8.62
  -9   7  -9  290.14    9.22
  -9   7  -8  376.29   11.45
  -9   2   8  389.56   10.89
  -9   7  -8  389.10   10.96
   2   7   8  380.97   10.94
  -9   2   7  249.92    7.52
  -9   7  -7  250.57    7.54
   2   7   7  252.50    7.65
  -9   7  -7  243.01    7.95
  -9   2   6   56.41    2.74
  -9   7  -6   60.95    2.76
   2   7   6   54.31    2.77
  -9   7  -6   59.87    3.08
  -9   7  -5  101.72    3.83
  -9   2   5  109.58    3.99
   2   7   5  107.56    4.00
  -9   7  -5  104.42    4.12
  -9   7  -4  415.32   11.31
  -9   7  -4  413.72   11.42
  -9   2   4  426.84   11.56
   2   7   4  425.28   11.62
  -9   7  -4  403.30   11.64
  -9   7  -3  176.93    5.32
   2   7   3  173.73    5.56
  -9   7  -3  172.50    5.52
  -9   2   3  158.93    5.44
  -9   7  -2  181.74    5.60
  -9   7  -1  163.47    5.13
  -9   2   1  161.76    5.16
   2   7   1  157.15    5.21
  -9   7   0  408.79   10.89
  -9   2   0  388.35   10.82
  -9   7   0  384.25   10.78
  -9   7   1   96.92    3.62
  -9   2  -1   96.65    3.52
  -9   7   1   98.48    3.55
  -9   7   2  574.81   15.50
  -9   7   2  583.36   15.52
  -9   2  -2  586.82   15.40
  -9   7   3  239.19    7.19
  -9   2  -3  238.66    6.99
  -9   7   4  138.53    4.67
  -9   7   4  128.09    4.60
  -9   2  -4  130.92    4.35
  -9   7   5  677.79   17.80
  -9   7   5  663.67   17.68
  -9   2  -5  658.17   17.34
  -9   7   6  229.78    7.32
  -9   7   6  236.94    7.23
  -9   2  -6  240.51    6.94
  -9   7   7   90.35    3.68
  -9   2  -7   90.99    3.41
  -9   7   8   31.58    2.18
  -9   2  -8   30.90    1.92
  -9   7   9   34.91    2.56
  -9   2  -9   37.47    2.17
  -9   7   9   37.28    2.31
  -9   2 -10   89.14    3.56
  -9   7  10   84.90    3.61
  -9   7  10   97.09    4.13
  -9   7  11   40.81    2.39
  -9   2 -11   37.57    2.32
  -9   7  11   41.51    2.84
  -9   2 -12   98.41    3.89
  -9   7  12  100.12    4.29
  -9   2 -13   70.56    3.18
  -9   7  13   73.05    3.68
  -9   2 -14  147.91    5.04
  -9   7  14  139.04    5.30
  -9   7  15  174.59    5.93
  -9   2 -15  176.71    5.68
  -9   2 -16    3.73    1.24
  -9   7  16    6.62    1.49
  -9   2 -17   67.92    2.69
  -9   2 -18   23.61    1.37
  -9   2 -20   30.05    1.68
 -10   7 -19   12.81    1.05
 -10   7 -18   23.28    1.55
   7   3 -17   42.88    2.21
 -10   7 -17   49.86    2.45
 -10   7 -16   27.58    2.78
 -10   7 -16   27.47    2.23
   7   3 -16   26.67    1.99
 -10   7 -15   34.68    3.06
   7   3 -15   28.81    2.17
 -10   3  15   31.74    2.09
 -10   3  14   50.74    2.84
 -10   7 -14   59.85    3.72
   7   3 -14   57.57    2.96
 -10   3  13   89.67    3.82
   7   3 -13   77.03    3.61
 -10   7 -13   88.18    4.45
 -10   3  12  164.93    5.98
   7   3 -12  158.94    5.76
 -10   3  11  107.22    4.49
 -10   3  11  103.38    3.96
   7   3 -11   99.48    4.10
 -10   7 -11  108.26    5.00
 -10   3  10   76.07    3.74
 -10   3  10   74.78    3.30
 -10   7 -10   71.96    4.04
 -10   3   9  360.80   10.56
 -10   3   9  342.65   10.13
 -10   7  -9  351.65   10.84
 -10   3   8  238.15    7.47
 -10   7  -8  212.05    7.08
 -10   3   8  228.37    7.09
   3   7   8  225.62    7.12
 -10   7  -8  226.39    7.59
 -10   7  -7   42.11    2.56
 -10   3   7   41.30    2.49
   3   7   7   44.76    2.58
 -10   7  -7   43.17    2.81
 -10   3   6  149.29    5.20
 -10   7  -6  151.77    5.12
   3   7   6  152.03    5.21
 -10   7  -6  144.13    5.35
 -10   3   5   76.75    3.38
 -10   7  -5   76.71    3.22
   3   7   5   78.02    3.35
 -10   7  -5   75.34    3.39
 -10   7  -4  337.75    9.51
 -10   3   4  352.82    9.88
   3   7   4  356.78    9.89
 -10   7  -3  160.39    5.16
 -10   7  -2  420.31   11.53
 -10   3   2  414.56   11.66
 -10   7  -1   78.98    3.30
 -10   3   1   86.06    3.45
 -10   7   0  170.68    5.45
 -10   3   0  174.50    5.59
 -10   7   0  170.48    5.56
 -10   7   1  199.47    6.30
 -10   7   1  205.72    6.41
 -10   3  -1  207.66    6.36
 -10   7   2  146.99    5.01
 -10   7   2  150.18    5.07
 -10   3  -2  145.80    4.90
 -10   7   3  239.50    7.39
 -10   3  -3  242.81    7.19
 -10   3  -4   38.95    2.18
 -10   7   4   42.56    2.50
 -10   7   5   53.64    2.84
 -10   3  -5   59.54    2.52
 -10   7   5   57.33    2.95
 -10   7   6  215.39    6.88
 -10   7   6  220.24    7.10
 -10   7   7  282.78    8.93
 -10   7   7  294.67    8.78
 -10   3  -7  295.26    8.47
 -10   7   8    4.40    1.61
 -10   3  -8    5.50    1.33
 -10   7   9  147.79    5.48
 -10   7   9  138.66    5.12
 -10   3  -9  145.30    4.95
 -10   7  10   76.57    3.83
 -10   3 -10   79.97    3.36
 -10   7  10   74.17    3.49
 -10   3 -11   18.47    1.88
 -10   7  11   17.17    1.88
 -10   7  11   16.90    2.30
 -10   3 -12  108.79    4.06
 -10   7  12  104.40    4.48
 -10   3 -13  121.29    4.50
 -10   7  13  123.48    4.91
 -10   3 -14   72.00    3.14
 -10   7  14   68.72    3.44
 -10   3 -15   79.61    3.20
 -10   7  15   76.45    3.47
 -10   3 -16   35.53    1.93
 -10   7  16   27.70    2.00
 -10   3 -17   40.69    1.92
 -10   3 -17   43.11    2.83
 -10   3 -18   14.86    1.80
 -10   3 -19   11.95    1.46
 -11   7 -18   29.26    1.91
 -11   7 -17   32.36    1.80
 -11   7 -17   32.15    2.36
 -11   7 -16   15.81    2.25
 -11   4  16   12.65    1.36
 -11   7 -16   16.98    1.64
 -11   7 -15   40.09    2.31
 -11   7 -15   34.61    2.78
 -11   4  15   34.12    2.15
 -11   4  14   74.59    3.43
 -11   7 -14   78.85    4.07
 -11   7 -14   78.65    3.46
 -11   7 -13   70.00    3.24
 -11   4  13   64.33    3.38
 -11   7 -13   65.28    3.80
 -11   7 -12   11.85    2.45
 -11   4  12   13.03    1.55
 -11   7 -12   11.63    2.14
 -11   4  12   12.58    2.18
 -11   4  11  116.83    4.87
 -11   4  11  112.00    4.29
 -11   7 -11  115.62    4.59
 -11   7 -11  124.93    5.14
 -11   4  10   56.53    3.43
 -11   4  10   56.25    2.95
 -11   7 -10   54.63    3.57
 -11   4   9   49.71    3.29
 -11   4   9   48.56    2.83
 -11   7  -9   52.55    3.33
 -11   4   8   89.01    4.24
 -11   4   8   94.91    3.96
 -11   7  -8   89.71    4.23
 -11   4   7   38.08    2.56
 -11   7  -7   36.39    2.63
 -11   4   6  101.58    4.27
 -11   4   6   99.74    4.10
 -11   7  -6   88.59    3.91
 -11   4   5   43.73    2.64
 -11   7  -5   34.99    2.37
 -11   7  -4  146.28    4.91
 -11   4   4  150.77    5.30
 -11   7  -3  537.74   14.57
 -11   4   2  113.19    4.36
 -11   7  -2  114.93    4.22
 -11   7  -1   87.97    3.68
 -11   4   1   96.38    3.84
 -11   7   0  185.15    6.12
 -11   4   0  196.38    6.19
 -11   7   0  184.21    5.96
 -11   7   1  245.41    7.58
 -11   4  -1  249.62    7.59
 -11   7   1  255.38    7.74
 -11   7   2  218.51    7.03
 -11   7   2  231.23    7.16
 -11   4  -2  228.06    7.01
 -11   7   3   18.84    2.09
 -11   4  -3   18.52    1.68
 -11   7   3   15.53    1.85
 -11   7   4  138.79    5.20
 -11   4  -4  145.10    4.82
 -11   7   5   16.03    2.02
 -11   4  -5   15.73    1.54
 -11   7   5   18.15    2.09
 -11   7   6   47.87    2.78
 -11   7   6   45.76    2.91
 -11   7   7  399.28   11.71
 -11   7   7  398.82   11.55
 -11   7   8  348.33   10.35
 -11   7   9   35.28    2.47
 -11   4  -9   38.16    2.36
 -11   4 -10    7.77    1.53
 -11   7  10    7.02    1.68
 -11   7  10    6.19    2.06
 -11   7  11   38.09    2.52
 -11   7  11   40.17    2.97
 -11   4 -11   40.40    2.41
 -11   7  12   50.91    2.65
 -11   4 -12   50.83    2.75
 -11   7  12   49.98    3.27
 -11   7  13   66.15    3.53
 -11   4 -13   67.68    3.03
 -11   4 -14   59.49    3.43
 -11   4 -14   53.71    2.62
 -11   7  14   54.99    3.07
 -11   4 -15   18.04    2.39
 -11   7  15   16.35    1.80
 -11   7  16   34.83    2.04
 -11   4 -16   32.62    2.53
 -11   4 -17   19.18    1.95
 -11   4 -18   15.20    1.54
 -12   7 -17    1.15    1.17
 -12   7 -16   60.45    3.29
 -12   5  16   54.03    2.24
 -12   7 -15   50.22    2.82
 -12   5  15   47.65    2.41
 -12   7 -14   19.25    2.21
 -12   5  14   19.52    1.98
 -12   5  13   48.56    2.91
 -12   7 -13   46.81    3.14
 -12   5  12   44.58    3.04
 -12   5  12   43.02    2.38
 -12   5  11  105.28    4.55
 -12   5  11   96.38    3.91
 -12   7 -11  102.53    4.51
 -12   5  10  116.64    4.96
 -12   5  10  118.06    4.50
 -12   7 -10  112.40    4.84
 -12   5   9  248.91    7.87
 -12   7  -9  245.82    8.12
 -12   5   9  253.63    8.25
 -12   7  -8   19.46    2.07
 -12   5   8   23.12    2.32
 -12   5   7  143.44    5.41
 -12   5   7  135.55    5.02
 -12   5   6  137.12    5.27
 -12   5   6  144.20    5.39
 -12   5   5   28.35    2.63
 -12   5   5   28.21    2.57
 -12   7  -4  243.83    7.41
 -12   5   4  245.09    7.84
 -12   7  -3  146.45    4.97
 -12   5   3  151.31    5.31
 -12   7  -2   87.54    3.68
 -12   5   2   87.87    3.82
 -12   5   2   85.56    3.88
 -12   7  -1  421.75   12.15
 -12   5   1  426.87   12.12
 -12   5   1  442.61   12.29
 -12   7   0   71.09    3.18
 -12   7   0   75.50    3.47
 -12   5   0   70.33    3.18
 -12   5   0   77.60    3.48
 -12   7   1   51.67    2.77
 -12   7   1   51.74    2.95
 -12   5  -1   50.55    2.62
 -12   5  -1   52.96    2.90
 -12   7   2  111.36    4.33
 -12   7   2  114.72    4.52
 -12   5  -2  106.78    4.21
 -12   7   3  168.72    5.88
 -12   7   3  169.50    5.94
 -12   5  -3  166.83    5.60
 -12   7   4   32.35    2.61
 -12   5  -4   35.41    2.14
 -12   7   5  150.67    5.49
 -12   7   5  144.06    5.45
 -12   5  -5  142.86    4.87
 -12   7   6   93.51    4.15
 -12   7   6   92.82    4.28
 -12   7   7    1.94    1.85
 -12   7   7    2.54    2.05
 -12   7   8  151.41    5.42
 -12   5  -8  135.04    5.13
 -12   7   8  143.14    5.67
 -12   7   9   43.40    2.85
 -12   5  -9   41.92    2.69
 -12   7  10   33.31    2.40
 -12   5 -10   27.55    2.40
 -12   7  10   37.34    2.96
 -12   7  11  111.28    4.65
 -12   7  11   98.26    3.98
 -12   5 -11  101.84    4.40
 -12   7  12  134.92    4.81
 -12   5 -12  142.91    5.38
 -12   7  12  150.86    5.47
 -12   7  13   11.85    2.02
 -12   5 -13   13.76    2.10
 -12   5 -14   41.73    2.72
 -12   7  14   42.08    2.55
 -12   7  15   24.88    1.96
 -12   5 -15   28.41    2.25
 -12   5 -16   13.75    1.72
 -12   7  16   13.29    1.33
 -12   5 -17   10.96    1.33
 -13   7 -15   12.83    1.53
 -13   6  15   10.27    1.34
 -13   7 -14   28.86    2.17
 -13   6  14   31.79    2.28
 -13   7 -13   30.47    2.26
 -13   6  13   32.85    2.38
 -13   6  12    7.53    1.51
 -13   6  12    9.13    1.98
 -13   7 -12    7.07    1.66
 -13   6  11   14.65    1.73
 -13   6  11   13.69    2.33
 -13   7 -11   17.90    1.98
 -13   7 -10    9.29    1.76
 -13   6  10    7.61    1.77
 -13   6  10    7.64    2.27
 -13   6   9  170.36    5.70
 -13   7  -9  146.55    5.46
 -13   7  -8    8.52    1.67
 -13   6   8   11.36    2.10
 -13   6   8   11.26    2.34
 -13   6   7   28.37    2.55
 -13   6   7   24.46    2.71
 -13   6   6   41.24    3.06
 -13   6   6   42.24    2.96
 -13   6   5   97.45    4.42
 -13   6   5   97.98    4.32
 -13   6   4  183.31    6.37
 -13   7  -4  178.55    5.85
 -13   6   3   46.82    2.85
 -13   7  -3   47.83    2.64
 -13   6   3   49.69    3.09
 -13   6   2  174.87    6.06
 -13   7  -2  174.24    5.93
 -13   6   2  182.36    6.24
 -13   6   1  142.05    5.15
 -13   7  -1  140.13    5.20
 -13   6   1  146.01    5.42
 -13   6   0  101.33    4.13
 -13   7   0  114.39    4.46
 -13   6   0  115.66    4.49
 -13   7   0  104.03    4.13
 -13   7   1   63.08    3.21
 -13   7   1   67.76    3.49
 -13   6  -1   70.75    3.39
 -13   6  -2   28.86    2.25
 -13   7   2   25.81    2.43
 -13   7   2   26.89    2.27
 -13   7   3  127.62    5.08
 -13   6  -3  124.76    4.62
 -13   7   3  130.17    4.97
 -13   7   4   69.69    3.55
 -13   6  -4   73.43    3.16
 -13   7   5    8.33    2.21
 -13   7   5    6.56    2.01
 -13   7   6   50.73    3.39
 -13   7   6   57.07    3.32
 -13   7   7   21.30    2.35
 -13   7   7   20.26    2.56
 -13   7   8  118.94    4.91
 -13   7   8  110.16    4.59
 -13   7   9   75.10    3.63
 -13   6  -9   69.67    3.33
 -13   7  10   69.16    3.38
 -13   6 -10   70.97    3.33
 -13   7  11   32.00    2.23
 -13   6 -11   29.63    2.21
 -13   7  11   35.70    2.83
 -13   7  12   55.72    2.84
 -13   6 -12   56.29    2.95
 -13   7  12   60.72    3.23
 -13   6 -13   27.96    2.16
 -13   7  13   30.67    2.33
 -13   6 -14    8.35    1.57
 -13   7  14    9.53    1.85
 -13   6 -15   16.29    1.58
 -13   7  15   17.53    1.52
 -13   6 -16   13.88    1.21
 -13   7  16   14.50    1.07
 -14   7   0   12.10    2.04
 -14   7   0   14.21    1.70
 -14   7   1   72.14    3.40
 -14   7  -1   81.16    3.63
 -14   7   1   72.62    3.70
 -14   7   2   51.17    2.99
 -14   7  -2   53.23    2.89
 -14   7   2   47.86    3.12
 -14   7  -3    2.51    1.55
 -14   7   3    2.47    2.07
 -14   7   3   -0.09    1.69
 -14   7   4   89.52    4.07
 -14   7  -4   89.06    3.60
 -14   7   5  138.54    5.28
 -14   7   6   25.26    2.72
 -14   7   6   25.91    2.58
 -14   7   7   92.46    4.24
 -14   7   7   83.09    3.98
 -14   7   8   39.99    2.80
 -14   7   8   48.81    3.08
 -14   7   9    9.54    1.90
 -14   7   9   13.92    2.47
 -14   7  10  124.67    4.56
 -14   7  11   78.38    3.28
 -14   7  11   89.30    3.75
 -14   7 -12    4.26    1.25
 -14   7  12    3.67    1.15
 -14   7  12    7.55    1.84
 -14   7 -13   42.49    2.13
 -14   7  13   53.05    2.55
 -14   7  14   19.03    1.53
 -14   7  15    0.11    0.77
   8  -4   0  141.83    6.14
   8  -4   1   26.13    2.47
   8  -4  -1   24.61    2.63
   8  -4  -2  192.15    7.67
   8  -4   2  193.85    7.55
  -4   8   3  649.51   17.69
  -4   8   3  632.75   16.64
  -4   8   3  637.32   16.66
  -4   8   3  630.93   16.57
   8  -4  -3  609.25   18.87
  -4   8   4   14.50    1.36
  -4   8   4   16.40    1.49
  -4   8   4   17.68    1.74
  -4   8   5   95.59    4.39
  -4   8   5   91.27    3.39
  -4   8  -6   72.68    3.23
  -4   8   6   65.76    2.99
  -4   8   6   75.51    2.95
  -4   8   7    2.52    1.14
  -4   8  -7    1.16    1.32
  -4   8   7    3.16    1.33
  -4   8   8   30.35    2.15
  -4   8  -8   28.84    1.75
  -4   8  -8   29.29    2.25
  -4   8   8   31.87    1.91
  -4   8  -9  279.58    8.52
  -4   8  -9  263.82    7.92
  -4   8   9  268.10    8.25
  -4   8   9  280.35    8.01
  -4   8 -10  154.61    5.63
  -4   8  10  154.05    5.37
  -4   8  10  145.17    4.98
  -4   8 -10  156.41    5.16
  -4   8  11   81.41    3.65
  -4   8 -11   82.86    3.50
  -4   8 -11   80.98    3.93
  -4   8 -12  137.15    5.01
  -4   8 -12  142.62    5.54
  -4   8  12  141.70    5.18
  -4   8 -13   39.72    2.54
  -4   8  13   36.15    2.55
  -4   8 -13   40.20    2.94
  -4   8 -14   17.87    2.28
  -4   8  14   14.86    1.85
  -4   8 -14   12.59    1.86
  -4   8 -15  111.92    4.46
  -4   8  15  104.32    4.13
  -4   8 -16    6.68    1.77
   8  -4 -16    6.91    2.34
   8  -4 -17   10.29    2.27
  -4   8 -17    9.14    1.78
  -4   8 -18   59.55    2.78
   8  -4 -18   52.74    3.22
  -4   8 -19    2.80    1.30
   8  -4 -19    2.52    1.64
   8  -4 -20    4.47    1.29
  -4   8 -20    4.74    0.98
   8  -4 -21    1.20    0.79
   8  -3 -21   27.53    1.48
  -5   8 -20    2.72    0.99
   8  -3 -20    2.42    1.31
  -5   8 -19   16.66    1.59
   8  -3 -19   15.21    2.06
  -5   8 -18   15.05    1.75
  -5   8 -17   20.56    2.13
  -5   8 -16   48.89    2.85
  -5   8 -16   49.87    3.20
  -5   8 -15   49.82    2.91
  -5   8 -15   51.44    3.40
  -5   8 -14   25.78    2.87
  -3   8  14   22.45    2.00
  -5   8 -14   26.72    2.34
  -3   8  13   86.44    3.86
  -5   8 -13   91.23    3.97
  -5   8 -13   93.16    4.40
  -5   8 -12  135.13    4.94
  -3   8  12  139.18    5.01
  -3   8  11   23.77    2.16
  -5   8 -11   24.34    2.05
  -5   8 -11   24.56    2.51
  -5   8 -10  269.71    8.17
  -5   8 -10  280.72    8.76
  -3   8  10  281.70    8.43
  -3   8  10  267.84    7.99
  -5   8  -9  218.83    6.74
  -3   8   9  213.57    6.95
  -5   8  -9  228.25    7.37
  -3   8   9  223.27    6.71
  -5   8  -8   27.51    2.31
  -5   8  -8   28.00    1.83
  -3   8   8   28.92    2.09
  -3   8   8   26.58    1.83
  -3   8   7  193.43    6.24
  -5   8  -7  197.41    5.96
  -5   8  -7  199.27    6.53
  -3   8   7  203.08    6.13
  -5   8  -6  327.23    8.90
  -3   8   6  314.78    9.22
  -3   8   6  320.31    9.08
  -3   8   5  259.97    7.54
  -3   8   4  352.89    9.63
  -3   8   4  334.35    9.49
  -3   8   3  793.83   21.23
  -3   8   3  846.78   21.20
   8  -3  -3  822.17   23.57
  -3   8   2   13.26    1.39
   8  -3  -2   10.98    1.87
  -3   8   2   13.53    1.49
   8  -3  -1  206.02    8.07
  -3   8   1  217.03    6.49
  -3   8   1  218.57    6.34
  -3   8   0   33.10    1.93
   8  -3   0   29.84    2.60
  -5   8   1   15.33    1.32
   8  -5  -1   12.09    2.15
   8  -3   1   12.28    1.92
  -5   8   2  477.94   12.96
  -3   8  -2  494.26   13.21
   8  -3   2  498.65   15.03
   8  -5  -2  482.26   15.23
  -5   8   3  175.43    5.50
  -5   8   3  182.33    6.60
  -5   8   3  187.06    5.62
  -5   8   4  207.15    6.29
  -5   8   4  210.61    6.38
  -5   8   4  226.95    7.70
  -5   8   5  617.53   16.41
  -5   8   5  640.41   18.19
  -5   8   5  621.77   16.51
  -5   8   6  370.68   10.29
  -5   8   7  103.00    3.98
  -5   8   7  108.78    3.84
  -5   8   8   83.83    3.58
  -5   8   8   87.34    3.36
  -5   8   9  319.53    9.26
  -5   8   9  304.60    8.95
  -5   8  10    4.28    1.56
  -3   8 -10    3.59    1.13
  -5   8  10    3.02    1.24
  -3   8 -11  363.92   10.39
  -5   8  11  364.99   10.69
  -3   8 -12  195.06    6.32
  -5   8  12  194.67    6.57
  -5   8  13    2.76    1.59
  -3   8 -13    3.19    1.56
  -3   8 -14   52.38    2.90
  -5   8  14   56.77    3.00
  -3   8 -15   57.27    3.04
  -5   8  15   60.14    2.99
  -3   8 -16   73.83    3.42
   8  -5 -16   84.59    4.01
   8  -5 -17   25.29    2.52
  -3   8 -17   23.30    2.04
  -3   8 -18   50.66    2.53
   8  -5 -18   46.41    2.86
  -3   8 -19    5.90    1.29
   8  -5 -19    6.02    1.65
  -3   8 -20    3.86    0.96
   8  -5 -20    7.53    1.34
   8  -2 -21   11.96    1.05
  -6   8 -20    1.94    0.93
   8  -2 -20    2.23    1.24
   8  -2 -19   50.01    2.74
  -6   8 -19   51.51    2.39
  -6   8 -18    1.58    1.43
   8  -2 -18    1.90    1.94
  -6   8 -17   22.72    2.50
   8  -2 -17   21.36    2.54
  -6   8 -17   22.67    2.15
  -6   8 -16  129.89    4.93
   8  -2 -16  138.52    5.47
  -6   8 -16  137.06    5.52
  -6   8 -15   17.26    2.52
  -6   8 -15   14.74    2.07
  -2   8  14   20.23    1.86
  -6   8 -14   26.41    3.00
  -6   8 -14   20.40    2.27
  -6   8 -13  159.91    6.32
  -6   8 -13  149.16    5.47
  -2   8  13  157.95    5.46
  -6   8 -12   98.88    4.12
  -6   8 -12  103.07    4.75
  -2   8  12  100.59    4.12
  -6   8 -11   43.39    2.62
  -6   8 -11   49.40    3.31
  -2   8  11   42.62    2.64
  -6   8 -10  473.58   13.06
  -2   8  10  469.53   13.20
  -6   8 -10  465.10   13.65
  -6   8  -9  155.16    5.23
  -2   8   9  154.18    5.39
  -6   8  -9  160.31    5.83
  -2   8   9  156.05    5.13
  -6   8  -8   82.11    3.30
  -6  -2   8   85.06    3.14
  -2   8   8   84.16    3.54
  -2   8   8   84.05    3.32
  -2   8   7  620.15   16.85
  -6  -2   7  625.36   16.46
  -6   8  -7  630.02   16.58
  -2   8   7  635.72   16.67
  -6   8  -6  129.71    4.30
  -2   8   6  129.88    4.58
  -6   8  -6  128.34    4.79
  -2   8   6  138.23    4.48
  -6   8  -5   27.67    2.08
  -6   8  -5   26.21    1.57
  -2   8   5   28.13    1.93
  -2   8   5   29.48    1.82
   8  -2  -4  525.03   16.88
  -6   8  -4  561.03   15.10
  -2   8   4  565.85   14.82
  -2   8   3  184.01    5.67
   8  -2  -3  176.40    7.36
  -2   8   3  191.63    5.78
   8  -2  -2   59.55    3.72
  -2   8   2   60.67    2.63
  -6   8  -1  128.26    4.30
   8  -2  -1  134.76    5.91
  -2   8   1  138.96    4.48
  -2   8   1  140.39    4.42
   8  -2   0   20.77    2.23
  -2   8   0   22.93    1.71
  -6   8   0   21.65    1.53
  -2   8   0   23.04    1.53
  -6   8   1   20.48    1.51
   8  -2   1   17.43    2.13
  -2   8  -1   21.37    1.66
  -2   8  -1   21.05    1.49
  -6   8   2  451.53   12.18
   8  -2   2  437.60   13.95
  -2   8  -2  462.28   12.35
  -2   8  -2  431.36   12.06
  -6   8   2  468.57   12.18
  -6   8   3    1.85    1.06
  -2   8  -3    0.33    1.15
  -2   8  -3   -0.16    0.93
  -6   8   4    7.75    1.32
  -2   8  -4    8.57    1.42
  -6   8   4    8.35    1.59
  -6   8   4    6.57    1.29
  -2   8  -4   10.52    1.14
  -6   8   5 1036.61   26.41
  -6   8   5 1021.19   26.47
  -6   8   6  198.51    6.13
  -6   8   7    4.89    1.26
  -6   8   7    5.13    1.42
  -6   8   8  277.52    8.18
  -6   8   8  282.17    8.41
  -6   8   9   38.73    2.50
  -6   8   9   43.70    2.31
  -6   8  10   31.84    2.34
  -6   8  10   32.43    2.07
  -2   8 -11  284.87    8.25
  -6   8  11  275.65    8.60
  -6   8  11  274.92    8.19
  -2   8 -12   35.03    2.23
  -6   8  12   36.17    2.58
  -2   8 -13   46.12    2.64
  -6   8  13   49.69    2.94
  -2   8 -14  112.09    4.32
  -6   8  14  115.04    4.52
  -2   8 -15   21.41    2.05
  -6   8  15   23.98    2.09
  -6   8  16   70.90    3.17
  -2   8 -16   72.29    3.25
   8  -6 -16   71.13    3.67
  -2   8 -17   96.96    3.71
   8  -6 -17   90.30    4.04
  -2   8 -18    8.29    1.38
   8  -6 -18    7.94    1.77
  -2   8 -19    0.56    1.05
   8  -6 -19    1.38    1.33
  -2   8 -20   14.90    1.04
   8  -6 -20   15.20    1.28
   8  -1 -20   51.99    2.34
  -7   8 -20   55.01    2.13
   8  -1 -19   42.46    2.40
  -7   8 -19   38.61    2.02
  -7   8 -18   34.87    2.13
   8  -1 -18   36.65    2.58
  -7   8 -17   23.11    2.50
  -7   8 -17   21.86    2.05
   8  -1 -17   20.71    2.37
   8  -1 -16  115.32    4.93
  -7   8 -16  109.79    5.01
  -7   8 -16  109.58    4.35
  -7   8 -15   29.03    3.13
  -7   8 -15   26.10    2.37
  -7   8 -14   43.03    3.44
  -7   8 -14   40.89    2.82
  -7  -1  13   65.43    3.02
  -7   8 -13   68.08    3.36
  -1   8  13   67.92    3.18
  -7   8 -13   63.62    4.06
  -7   8 -12   45.43    2.78
  -7  -1  12   47.20    2.53
  -1   8  12   37.65    2.52
  -7   8 -12   41.49    3.36
  -7   8 -11   97.07    4.06
  -7   8 -11   96.33    4.57
  -1   8  11   95.06    3.99
  -1   8  10  543.25   14.96
  -7   8 -10  540.04   14.83
  -7  -1   9   62.71    2.76
  -1   8   9   67.17    3.17
  -7   8  -9   65.83    3.00
  -1   8   9   63.96    2.86
  -1   8   8  574.92   15.20
  -7  -1   8  553.02   15.01
  -7   8  -8  568.38   15.20
  -1   8   8  557.61   15.37
  -7   8  -8  566.29   15.77
  -7   8  -7  573.84   15.61
  -7  -1   7  589.96   15.53
  -1   8   7  575.90   15.84
  -7   8  -7  603.88   16.22
  -1   8   7  589.02   15.70
  -7   8  -6   72.76    2.95
  -7  -1   6   74.81    2.94
  -1   8   6   76.89    3.26
  -7   8  -6   72.26    3.41
  -1   8   6   71.45    3.05
  -7   8  -5  797.16   20.57
  -7  -1   5  786.48   20.59
  -1   8   5  785.18   20.85
  -7   8  -5  801.94   21.09
  -1   8   5  808.74   20.77
  -7   8  -4  214.68    6.10
  -7   8  -4  204.52    6.52
  -1   8   4  206.51    6.29
  -7   8  -3  193.61    5.79
  -7   8  -3  194.47    6.15
  -1   8   3  192.94    5.97
  -1   8   3  191.34    6.03
   8  -1  -3  202.28    7.69
  -7   8  -3  197.33    5.72
   8  -1  -2  114.40    5.32
  -7   8  -2  113.97    3.84
  -1   8   2  110.54    3.95
  -7   8  -1  114.64    3.88
   8  -1  -1  116.35    5.28
  -1   8   1  114.35    3.94
  -1   8   1  112.61    3.94
  -7   8   0  226.22    6.59
   8  -1   0  210.71    8.00
  -1   8   0  232.13    6.80
  -1   8   0  213.15    6.55
  -1   8   0  223.99    6.58
   8  -1   1  104.78    5.09
  -1   8  -1  114.64    3.88
  -1   8  -1  118.27    4.08
  -7   8   1  113.61    3.94
  -1   8  -1  110.83    3.86
  -7   8   1  116.60    3.86
  -7   8   2  355.74    9.71
   8  -1   2  318.25   11.15
  -1   8  -2  341.07    9.58
  -1   8  -2  360.80    9.86
  -1   8  -2  344.74    9.61
  -7   8   2  347.63    9.65
  -1   8  -3  118.69    4.03
  -1   8  -3  119.46    3.96
  -1   8  -3  115.94    4.19
  -7   8   3  121.54    4.11
  -7   8   4  436.99   11.91
  -1   8  -4  433.41   11.99
  -1   8  -4  422.54   11.72
  -7   8   4  445.91   11.94
  -7   8   5  690.62   17.63
  -1   8  -5  644.47   17.37
  -1   8  -5  667.53   17.70
  -7   8   5  662.53   17.63
  -7   8   6   64.61    2.89
  -1   8  -6   65.70    2.95
  -7   8   6   65.29    3.01
  -7   8   7  134.48    4.56
  -1   8  -7  122.19    4.55
  -7   8   8  402.20   11.40
  -7   8   8  414.49   11.63
  -7   8   9    2.35    1.22
  -7   8   9    3.33    1.57
  -7   8  10  210.98    6.62
  -7   8  10  212.22    6.98
  -7   8  11   86.56    3.84
  -7   8  11   84.22    3.45
  -7   8  12   11.02    2.02
  -7   8  13  229.00    7.51
  -1   8 -14   66.56    3.12
  -7   8  14   79.14    3.53
  -1   8 -15  236.99    7.34
  -7   8  15  244.96    7.59
  -1   8 -16   34.44    2.16
   8  -7 -16   38.86    2.65
  -7   8  16   35.49    2.26
  -1   8 -17   23.95    1.77
   8  -7 -17   20.20    2.07
  -1   8 -18   43.09    2.14
   8  -7 -18   47.96    2.46
   8  -7 -19    9.34    1.21
   8   0 -20   15.41    1.20
  -8   8 -20   16.56    1.11
  -8   8 -19    1.88    1.04
   8   0 -19    0.57    1.24
  -8   8 -18   19.96    2.20
  -8   8 -18   15.48    1.63
   8   0 -18   20.06    2.31
  -8   8 -17  106.03    4.02
   8   0 -17  102.87    4.34
  -8   8 -17  108.26    4.59
  -8   8 -16    0.62    1.51
  -8   8 -16    0.77    2.30
   8   0 -16    0.39    1.93
  -8   8 -15    2.26    2.41
  -8   8 -15    1.34    1.66
   8   0 -15    0.72    1.91
  -8   8 -14  297.64    8.94
  -8   8 -14  311.70    9.72
  -8   0  13  127.23    4.67
   0   8  13  126.89    4.61
  -8   8 -13  127.32    4.98
  -8   0  12   97.33    3.98
  -8   8 -12   89.76    4.07
   0   8  12   97.85    3.93
  -8   8 -11  477.86   13.34
   0   8  11  469.74   13.27
  -8   8 -10  170.59    5.80
  -8   0  10  171.61    5.52
   0   8  10  174.19    5.88
  -8   8 -10  170.65    6.52
  -8   8  -9    7.08    1.93
   0   8   9    6.50    1.53
  -8   0   9    7.24    1.35
  -8   8  -9    5.34    1.40
   0   8   9    6.73    1.33
  -8   8  -8 1131.86   29.04
  -8   0   8 1112.07   28.93
   0   8   8 1139.63   29.22
   0   8   8 1125.89   29.06
  -8   8  -8 1131.38   29.66
  -8   0   7   72.82    3.20
  -8   8  -7   81.07    3.27
   0   8   7   77.67    3.42
   0   8   7   83.79    3.36
  -8   8  -7   83.00    3.79
  -8   8  -6    4.59    1.65
   0   8   6    6.34    1.48
  -8   8  -6    6.23    1.24
  -8   0   6    6.47    1.36
   0   8   6    5.97    1.36
  -8   8  -5  775.70   19.90
  -8   0   5  747.79   19.90
   0   8   5  753.70   20.12
  -8   8  -5  763.40   20.33
   0   8   5  771.57   20.06
  -8   8  -4   36.62    1.95
  -8   0   4   33.34    2.01
   0   8   4   33.93    2.18
  -8   8  -4   36.63    2.27
   0   8   4   34.29    2.12
  -8   8  -3   48.70    2.24
   0   8   3   48.14    2.41
  -8   8  -3   47.76    2.19
  -8   0   3   46.88    2.30
  -8   8  -3   40.90    2.40
  -8   8  -2  111.88    3.89
   0   8   2  114.26    4.03
   0   8   2  110.35    4.03
  -8   8  -1   13.82    1.43
   0   8   1   16.70    1.51
  -8   8   0   28.48    1.86
   0   8   0   27.20    1.81
   0   8   0   26.09    1.83
  -8   8   0   28.99    1.70
  -8   8   1  534.18   14.54
   0   8  -1  541.24   14.50
   0   8  -1  565.28   14.71
   0   8  -1  529.90   14.53
  -8   8   1  548.75   14.46
  -8   8   2   18.94    1.67
   0   8  -2   19.23    1.53
   0   8  -2   17.22    1.63
   0   8  -2   19.40    1.61
  -8   8   2   18.93    1.57
   0   8  -3  342.56    9.69
   0   8  -3  342.59    9.57
  -8   8   3  333.35    9.59
  -8   8   4 2831.62   70.61
   0   8  -4 2827.39   70.65
  -8   8   4 2842.57   70.65
  -8   8   5   14.48    1.73
  -8   0  -5   15.97    1.32
  -8   8   5   17.82    1.79
   0   8  -5   16.34    1.60
  -8   8   6  125.07    4.45
   0   8  -6  119.86    4.30
  -8   8   6  121.94    4.50
  -8   8   7  701.18   18.24
   0   8  -7  666.13   18.11
  -8   8   8   87.69    3.61
   0   8  -8   90.38    3.57
  -8   8   8   88.57    3.84
  -8   8   9   11.60    1.54
  -8   8   9   12.24    1.98
   0   8  -9   11.10    1.47
  -8   8  10  262.86    7.93
  -8   0 -10  255.47    7.58
  -8   8  10  267.64    8.24
  -8   8  11   13.71    1.66
  -8   8  11   10.79    1.95
  -8   0 -11   12.56    1.40
  -8   8  12    1.26    1.78
  -8   0 -12    1.24    1.12
  -8   8  13  133.18    5.14
   8  -8 -15  130.49    4.92
  -8   8  15  137.78    4.98
   8  -8 -16   26.71    2.12
  -8   8  16   24.93    2.02
   8  -8 -17   58.34    2.72
   8  -8 -18   11.36    1.24
  -8   0 -20   18.89    1.48
  -9   8 -19    8.54    1.08
   8   1 -19    8.73    1.13
  -9   8 -18   16.33    1.98
  -9   8 -18   15.27    1.61
   8   1 -18   15.07    1.63
  -9   8 -17   47.85    3.07
   8   1 -17   42.13    2.62
  -9   8 -17   49.47    2.50
  -9   8 -16   15.62    2.50
  -9   8 -16   17.15    1.94
   8   1 -16   16.16    2.10
  -9   8 -15  120.63    4.57
   8   1 -15  114.54    4.73
  -9   1  14   41.26    2.49
  -9   8 -14   48.46    2.85
   8   1 -14   44.74    2.96
  -9   8 -13   20.68    3.24
  -9   8 -13   22.79    2.39
  -9   1  13   21.64    2.11
  -9   8 -12   23.06    3.07
   1   8  12   26.37    2.03
  -9   8 -12   25.45    2.42
  -9   1  12   26.70    2.30
  -9   1  11   97.77    4.14
  -9   8 -11   94.53    4.07
   1   8  11   96.67    3.93
  -9   8 -11  100.64    4.85
  -9   8 -10   17.33    2.64
   1   8  10   17.36    1.90
  -9   1  10   15.07    1.66
  -9   8 -10   14.34    2.02
  -9   8  -9  457.10   13.19
  -9   1   9  470.55   13.07
   1   8   9  485.65   13.31
  -9   8  -9  485.28   13.90
  -9   1   8  489.54   13.48
  -9   8  -8  494.08   13.56
   1   8   8  496.81   13.69
  -9   8  -8  476.63   14.08
  -9   1   7   36.81    2.28
   1   8   7   31.89    2.29
  -9   8  -7   31.65    2.58
  -9   8  -7   37.76    2.31
  -9   8  -6  124.02    4.44
  -9   1   6  118.25    4.47
   1   8   6  124.14    4.58
   1   8   6  130.90    4.61
  -9   8  -6  126.51    4.83
  -9   8  -5  342.74    9.70
   1   8   5  348.04    9.94
  -9   8  -5  324.24   10.02
   1   8   5  346.96    9.91
  -9   1   5  348.29    9.84
  -9   8  -4  103.69    3.69
  -9   1   4  102.81    3.90
  -9   8  -4  106.79    3.79
   1   8   4  105.36    4.03
  -9   8  -4  100.64    4.05
   1   8   4  104.73    3.98
  -9   8  -3   10.39    1.50
  -9   8  -3   10.07    1.32
  -9   1   3   10.26    1.51
   1   8   3   10.20    1.57
   1   8   2    4.28    1.35
  -9   8  -2    2.63    1.13
   1   8   2    2.29    1.37
  -9   8  -1   59.63    2.75
   1   8   1   64.24    2.90
  -9   1   1   67.66    2.84
  -9   8   0   98.51    3.57
   1   8   0   94.01    3.79
  -9   8   0  103.33    3.78
  -9   1   0  105.76    3.74
   1   8   0  103.04    3.81
  -9   8   1  256.02    7.63
  -9   8   1  263.11    7.77
  -9   1  -1  264.57    7.63
   1   8  -1  264.49    7.74
  -9   8   2  150.42    5.05
  -9   8   2  158.38    5.20
  -9   1  -2  156.31    4.99
  -9   8   3  199.52    6.32
  -9   1  -3  203.21    6.12
  -9   8   4  918.19   23.63
  -9   1  -4  929.49   23.30
   1   8  -4  924.52   23.53
  -9   8   5   84.49    3.57
   1   8  -5   77.21    3.25
  -9   1  -5   82.02    3.10
  -9   8   5   87.72    3.56
  -9   8   6  494.30   13.49
  -9   8   6  486.70   13.38
   1   8  -6  468.87   13.12
  -9   8   7   90.67    4.04
  -9   8   7   98.23    3.96
  -9   1  -7   97.82    3.46
  -9   1  -8    7.03    1.13
  -9   8   8   10.10    1.68
  -9   8   9   54.43    2.91
  -9   1  -9   59.40    2.63
  -9   8   9   57.78    3.24
  -9   8  10   94.13    3.90
  -9   1 -10   93.56    3.59
  -9   8  10  105.57    4.37
  -9   8  11   19.42    1.87
  -9   1 -11   19.73    1.66
  -9   8  11   20.57    2.42
  -9   8  12   27.00    1.98
  -9   8  12   28.31    2.53
  -9   1 -12   28.03    1.90
  -9   1 -13   53.36    2.53
  -9   8  13   46.14    3.09
   8  -9 -14  169.80    5.76
  -9   1 -14  180.80    5.59
  -9   8  14  181.00    6.18
  -9   1 -15   30.28    1.83
  -9   8  15   34.91    2.40
  -9   8  16   56.91    2.79
   8   2 -18   29.80    1.56
 -10   8 -17   17.58    1.73
   8   2 -17   18.53    1.63
   8   2 -16    4.61    1.50
 -10   8 -16    4.40    1.52
 -10   2  15   87.51    3.50
 -10   8 -15   96.63    3.89
   8   2 -15   89.93    3.83
 -10   2  14   31.89    2.27
 -10   8 -14   34.60    3.10
 -10   8 -14   31.91    2.46
   8   2 -14   29.63    2.41
 -10   2  13  108.21    4.27
 -10   8 -13  103.04    4.27
 -10   8 -13  105.08    4.93
   8   2 -13  102.65    4.29
 -10   2  12  248.43    8.04
 -10   8 -12  257.58    7.95
   8   2 -12  241.73    7.93
 -10   8 -12  265.55    8.66
 -10   2  11   48.65    3.06
 -10   2  11   42.67    2.45
 -10   8 -11   48.33    2.88
 -10   8 -11   50.45    3.49
 -10   2  10   84.59    4.01
 -10   2  10   84.13    3.56
 -10   8 -10   93.79    3.92
   2   8  10   89.02    3.74
 -10   8 -10   89.88    4.49
 -10   2   9  448.56   12.72
 -10   8  -9  470.15   12.92
   2   8   9  453.54   12.87
 -10   8  -9  452.61   13.45
 -10   2   8   44.34    2.60
 -10   8  -8   43.01    2.62
 -10   8  -8   41.59    3.02
   2   8   8   43.18    2.64
 -10   2   7   63.50    3.11
 -10   8  -7   63.69    3.07
   2   8   7   61.45    3.14
 -10   8  -7   64.54    3.40
 -10   8  -6  176.07    5.77
 -10   2   6  180.35    5.93
 -10   8  -6  172.12    6.12
   2   8   6  175.28    5.96
 -10   8  -5   19.63    2.01
   2   8   5   21.08    2.02
 -10   2   5   20.77    2.00
 -10   8  -5   17.80    1.72
 -10   8  -4    2.84    1.36
   2   8   4    3.45    1.41
 -10   8  -4    2.31    1.14
 -10   2   4    4.14    1.58
 -10   8  -3   24.25    1.79
 -10   8  -3   22.61    1.87
 -10   8  -2   15.99    1.61
 -10   2   2   15.90    1.84
 -10   8  -1   17.78    1.69
 -10   2   1   18.37    1.87
 -10   8   0  253.71    7.54
 -10   8   0  256.24    7.73
 -10   2   0  261.32    7.72
 -10   8   1    8.87    1.58
 -10   2  -1    7.65    1.45
 -10   8   1    7.59    1.35
 -10   8   2   57.24    2.79
 -10   8   2   64.42    2.99
 -10   2  -2   60.06    2.78
 -10   8   3  572.58   15.30
 -10   8   3  540.08   15.25
 -10   2  -3  566.88   15.04
 -10   8   4   35.80    2.38
 -10   2  -4   32.66    2.01
 -10   8   5   39.93    2.54
 -10   8   5   42.19    2.62
 -10   2  -5   36.98    2.06
 -10   8   6  651.12   17.73
 -10   8   6  652.13   17.64
 -10   8   7   41.36    2.80
 -10   8   7   38.95    2.62
 -10   8   8   60.46    3.14
 -10   8   9  193.96    6.53
 -10   2  -9  205.19    6.20
 -10   8   9  188.82    6.80
 -10   8  10   20.23    2.05
 -10   2 -10   22.47    1.82
 -10   8  10   21.10    2.39
 -10   8  11   15.67    1.77
 -10   8  11   13.35    2.22
 -10   2 -11   14.53    1.58
 -10   8  12   41.17    2.42
 -10   2 -12   47.82    2.46
 -10   8  12   48.58    3.07
 -10   2 -13   41.81    2.33
 -10   8  13   48.18    3.01
 -10   2 -14   70.94    2.95
 -10   8  14   78.14    3.59
 -10   2 -15   68.00    2.78
 -10   8  15   75.21    3.36
 -10   8  16   16.09    1.70
 -10   2 -17   13.81    1.94
 -10   8  17   10.91    1.25
 -10   2 -18   28.51    1.99
 -10   2 -19    4.47    1.05
 -11   8 -17    2.99    1.57
 -11   8 -16   16.55    2.17
 -11   8 -15   45.91    3.08
 -11   3  15   40.98    2.26
 -11   3  14   98.40    3.96
 -11   8 -14  106.55    4.62
 -11   3  13   45.81    2.93
 -11   8 -13   56.98    3.43
 -11   3  12  111.47    4.68
 -11   8 -12  123.98    5.15
 -11   8 -11   10.33    2.44
 -11   3  11   10.73    1.66
 -11   8 -11   12.15    2.08
 -11   3  11   14.99    2.30
 -11   3  10   62.21    3.43
 -11   3  10   62.01    3.11
 -11   8 -10   71.16    3.39
 -11   8 -10   65.99    3.77
 -11   3   9   40.73    3.05
 -11   3   9   38.86    2.58
 -11   8  -9   38.94    2.64
 -11   8  -9   37.38    2.95
 -11   8  -8   10.78    2.04
 -11   3   8    8.25    1.88
 -11   8  -8    5.38    1.70
 -11   3   8    6.44    2.13
 -11   3   7   53.22    2.99
 -11   8  -7   51.65    2.87
 -11   8  -7   50.57    3.09
 -11   3   6   51.23    2.92
 -11   8  -6   44.09    2.82
 -11   8  -5    4.22    1.50
 -11   3   5    1.21    1.57
 -11   8  -4   53.98    2.59
 -11   3   4   55.44    2.99
 -11   8  -4   48.24    2.69
 -11   8  -3  177.32    5.75
 -11   8  -2   17.14    1.71
 -11   3   2   16.85    2.00
 -11   8  -1  121.72    4.53
 -11   3   1  123.62    4.61
 -11   8   0  162.82    5.42
 -11   8   0  166.51    5.62
 -11   3   0  169.49    5.67
 -11   8   1   21.72    1.81
 -11   8   1   21.14    2.01
 -11   3  -1   16.78    1.88
 -11   8   2  164.55    5.72
 -11   8   2  179.67    5.90
 -11   3  -2  172.71    5.70
 -11   8   3  208.02    6.83
 -11   8   3  214.38    6.88
 -11   3  -3  214.60    6.63
 -11   3  -4   19.59    1.72
 -11   8   4   24.26    2.18
 -11   8   5   80.52    3.88
 -11   3  -5   93.36    3.46
 -11   8   5   86.53    3.91
 -11   8   6  150.88    5.52
 -11   8   6  142.98    5.34
 -11   8   7  436.51   12.81
 -11   8   7  449.26   12.70
 -11   8   8  172.82    6.48
 -11   8   8  193.30    6.40
 -11   8   9   16.27    2.11
 -11   8  10   22.22    2.20
 -11   8  10   24.60    2.65
 -11   8  11    8.60    1.66
 -11   8  11    7.43    2.18
 -11   8  12    3.72    1.43
 -11   8  12    4.17    2.08
 -11   8  13   85.88    3.95
 -11   8  14   17.64    2.10
 -11   3 -15   24.27    2.31
 -11   8  15   25.59    2.11
 -11   3 -16    7.39    1.98
 -11   8  16    4.99    1.32
 -11   3 -17   13.30    1.68
 -11   3 -18   16.06    1.43
 -12   8 -16   38.58    2.30
 -12   8 -15   19.40    2.42
 -12   4  15   19.21    1.63
 -12   8 -14   26.43    2.42
 -12   4  14   30.51    2.15
 -12   4  13   82.48    3.67
 -12   8 -13   78.03    3.84
 -12   4  12   90.49    3.97
 -12   4  12   86.53    3.41
 -12   8 -12   88.22    4.11
 -12   8 -11   27.47    2.73
 -12   4  11   26.87    2.05
 -12   4  11   26.82    2.69
 -12   4  10  262.86    8.30
 -12   4  10  245.33    7.74
 -12   8 -10  243.81    8.18
 -12   4   9  114.38    4.87
 -12   4   9  108.27    4.41
 -12   8  -9  113.24    4.79
 -12   8  -8   52.45    3.18
 -12   4   8   56.51    3.09
 -12   4   7  160.32    5.70
 -12   8  -7  152.89    5.62
 -12   4   6   48.80    3.11
 -12   4   6   45.47    2.95
 -12   8  -6   39.11    2.57
 -12   4   5   31.85    2.67
 -12   4   5   27.69    2.53
 -12   8  -4   37.03    2.24
 -12   8  -3   43.36    2.50
 -12   8  -2   86.02    3.69
 -12   4   2   87.17    3.89
 -12   8  -1  294.63    8.87
 -12   4   1  295.24    8.99
 -12   8   0   16.19    2.02
 -12   4   0   12.63    1.95
 -12   8   0   15.04    1.64
 -12   8   1   41.21    2.71
 -12   4  -1   40.26    2.54
 -12   8   2  261.45    8.14
 -12   8   2  263.16    8.25
 -12   4  -2  265.15    8.04
 -12   8   3   38.77    2.57
 -12   8   3   39.44    2.85
 -12   4  -3   42.35    2.47
 -12   8   4  100.43    4.26
 -12   4  -4   97.80    3.82
 -12   8   5  118.21    4.86
 -12   8   5  121.84    4.89
 -12   4  -5  119.95    4.26
 -12   8   6   21.23    2.48
 -12   8   6   24.94    2.46
 -12   8   7   28.28    2.60
 -12   8   7   26.19    2.60
 -12   8   8  251.79    8.13
 -12   4  -8  227.07    7.54
 -12   8   8  248.97    7.87
 -12   8   9   19.11    2.24
 -12   4 -10   35.46    2.57
 -12   8  10   36.81    2.60
 -12   8  10   35.47    3.13
 -12   4 -11   98.03    4.32
 -12   8  11  101.41    4.08
 -12   8  12   34.75    2.24
 -12   4 -12   42.71    2.79
 -12   8  12   37.44    2.80
 -12   4 -13   11.66    1.97
 -12   8  13   12.75    2.10
 -12   4 -14   12.11    1.96
 -12   8  14   13.76    1.90
 -12   4 -15    8.44    1.89
 -12   8  15    6.92    1.54
 -12   4 -16   10.23    1.57
 -12   8  16    8.88    1.37
 -12   4 -17    5.90    1.13
 -13   5  15    1.66    1.06
 -13   8 -14   50.05    2.69
 -13   5  14   48.93    3.00
 -13   8 -13   31.71    2.28
 -13   5  13   28.83    2.25
 -13   8 -12    2.00    1.66
 -13   5  12    1.67    1.16
 -13   5  12    2.20    1.75
 -13   8 -11    8.99    1.73
 -13   5  11    9.58    1.55
 -13   5  11   10.07    2.24
 -13   5  10   97.90    4.38
 -13   5  10   94.81    3.86
 -13   8 -10   91.68    4.04
 -13   5   9  110.72    4.36
 -13   8  -9  102.37    4.30
 -13   5   8   37.80    2.71
 -13   8  -8   30.19    2.35
 -13   5   7   26.56    2.49
 -13   5   7   25.64    2.77
 -13   5   6    6.96    2.08
 -13   5   6    5.26    2.19
 -13   5   5   56.45    3.32
 -13   5   5   55.73    3.30
 -13   8  -4   38.55    2.39
 -13   5   4   46.49    2.90
 -13   5   3    0.28    1.92
 -13   8  -3    1.30    1.40
 -13   5   3   -0.09    1.68
 -13   8  -2  223.12    7.22
 -13   5   2  228.50    7.38
 -13   5   2  237.35    7.56
 -13   8  -1  267.49    8.32
 -13   5   1  269.47    8.31
 -13   5   1  269.68    8.47
 -13   8   0   41.66    2.42
 -13   8   0   46.05    2.81
 -13   5   0   44.49    2.62
 -13   5   0   41.17    2.79
 -13   8   1   40.78    2.53
 -13   8   1   42.33    2.82
 -13   5  -1   39.61    2.38
 -13   5  -1   44.47    2.78
 -13   8   2  119.66    4.70
 -13   8   2  129.60    4.95
 -13   5  -2  126.59    4.71
 -13   8   3   90.52    4.02
 -13   8   3   94.54    4.25
 -13   5  -3   95.32    3.84
 -13   8   4   25.09    2.41
 -13   5  -4   26.97    2.01
 -13   8   5    6.99    2.17
 -13   5  -5    4.76    1.31
 -13   8   5    6.79    1.99
 -13   8   6   21.20    2.44
 -13   8   6   20.15    2.47
 -13   8   7    6.85    2.19
 -13   8   7    7.17    2.00
 -13   8   8  128.78    5.32
 -13   8   8  140.05    5.23
 -13   8   9    6.79    1.88
 -13   8  10   59.39    3.06
 -13   5 -10   50.44    2.77
 -13   8  11   43.27    2.50
 -13   5 -11   40.54    2.50
 -13   8  11   46.48    3.05
 -13   8  12   59.38    2.74
 -13   5 -12   62.11    2.97
 -13   8  12   62.20    3.30
 -13   5 -13    3.14    1.44
 -13   8  13    4.17    1.74
 -13   5 -14    9.59    1.81
 -13   8  14    8.29    1.61
 -13   5 -15    5.61    1.26
 -13   8  15    4.91    1.22
 -13   5 -16    6.83    0.99
 -13   8  16    7.22    0.89
 -14   6  14   42.35    2.04
 -14   6  13    5.01    1.47
 -14   6  12    4.64    1.08
 -14   6  12    3.93    1.59
 -14   6  11   77.08    3.51
 -14   6  11   71.75    3.04
 -14   6  10   15.78    1.88
 -14   6   9    3.41    1.66
 -14   6   8  133.34    5.13
 -14   6   8  121.23    4.78
 -14   6   7   20.86    2.39
 -14   6   7   19.19    2.42
 -14   6   6    2.94    2.02
 -14   6   6    2.15    2.04
 -14   6   5  136.37    5.19
 -14   6   5  128.21    5.22
 -14   8  -4   10.17    1.55
 -14   6   4   11.21    2.07
 -14   8  -3   23.89    2.32
 -14   6   3   25.95    2.59
 -14   6   3   26.95    2.40
 -14   6   2   83.42    3.71
 -14   8  -2   83.49    3.62
 -14   6   2   83.23    3.91
 -14   8  -1   -1.06    1.77
 -14   6   1   -0.84    1.40
 -14   6   1    3.31    2.03
 -14   8   0    2.73    1.85
 -14   6   0    2.24    1.82
 -14   6   0    0.87    1.28
 -14   8   1  140.36    5.10
 -14   8   1  144.28    5.35
 -14   6  -1  150.49    5.29
 -14   8   2   46.86    2.81
 -14   8   2   53.23    3.10
 -14   6  -2   43.87    2.65
 -14   8   3   40.15    2.71
 -14   8   3   43.84    3.05
 -14   6  -3   40.12    2.55
 -14   8   4   76.85    3.76
 -14   6  -4   78.53    3.29
 -14   8   5   19.99    2.28
 -14   8   6    1.04    1.99
 -14   8   6    3.83    1.82
 -14   8   7  114.63    4.87
 -14   8   7  121.33    4.90
 -14   8   8   13.76    2.21
 -14   8   8   10.42    2.27
 -14   8   9    6.51    1.80
 -14   8   9    3.91    2.01
 -14   8  10  191.62    6.22
 -14   8  11   31.78    2.07
 -14   8  11   34.11    2.52
 -14   8  12   38.30    1.99
 -14   8  12   41.17    2.57
 -14   8  13   40.05    2.33
 -14   8  14    1.10    1.17
 -14   8  15    2.04    0.81
 -15   7  13    8.36    1.23
 -15   7  12   25.76    1.84
 -15   7  11   45.97    2.24
 -15   7  11   50.82    2.67
 -15   7  10   15.58    1.70
 -15   7   9   33.91    2.51
 -15   7   9   30.18    2.21
 -15   7   8   44.56    2.84
 -15   7   8   40.45    2.58
 -15   7   7   -0.49    1.72
 -15   7   7   -1.19    1.87
 -15   7   6   37.51    2.71
 -15   7   6   36.59    2.75
 -15   7   5   61.40    3.19
 -15   7   4   37.57    2.57
 -15   8  -4   34.40    2.09
 -15   8  -3   24.14    1.92
 -15   7   3   21.60    2.44
 -15   7   3   24.93    2.21
 -15   7   2   71.84    3.33
 -15   8  -2   82.82    3.47
 -15   7   2   81.33    3.83
 -15   7   1  157.44    5.40
 -15   8  -1  162.42    5.61
 -15   7   1  163.12    5.73
 -15   8   0  190.80    6.38
 -15   7   0  180.23    6.19
 -15   8   1  189.32    6.21
 -15   8   1  203.04    6.67
 -15   7  -1  201.37    6.53
 -15   8   2   52.24    3.20
 -15   7  -2   47.22    2.60
 -15   8   3    9.45    2.12
 -15   7  -3    6.18    1.42
 -15   8   3    8.09    1.73
 -15   8   4   70.32    3.32
 -15   7  -4   60.70    2.79
 -15   8   4   69.90    3.62
 -15   8   5   29.86    2.45
 -15   8   6   52.83    3.06
 -15   8   6   55.59    3.27
 -15   8   7   32.68    2.60
 -15   8   7   34.24    2.56
 -15   8   8   25.53    2.20
 -15   8   8   21.91    2.24
 -15   8   9   26.64    2.16
 -15   8   9   32.29    2.42
 -15   8  10   36.71    2.20
 -15   8  10   33.67    2.43
 -15   8  11   66.83    2.71
 -15   8  12    5.67    1.42
 -15   8  13   24.78    1.62
 -16   8   0   95.83    3.85
 -16   8  -1   23.42    2.00
 -16   8   1   27.48    2.22
 -16   8  -2    1.07    1.36
 -16   8   2    1.74    1.73
 -16   8   2    3.58    1.32
 -16   8   3   39.15    2.33
 -16   8  -3   40.84    2.24
 -16   8   3   41.98    2.77
 -16   8   4    3.93    1.84
 -16   8   4    6.72    1.60
 -16   8   5    5.17    1.57
 -16   8   6   42.57    2.63
 -16   8   6   35.57    2.38
 -16   8   7    0.48    1.60
 -16   8   7    0.34    1.48
 -16   8   8    1.38    1.53
 -16   8   8    1.68    1.50
 -16   8   9   45.40    2.33
 -16   8   9   48.67    2.52
 -16   8  10    1.07    0.98
 -16   8  10    3.49    1.26
 -16   8  12   17.33    1.23
   9  -4 -20    2.29    1.04
  -5   9 -19   11.38    1.18
   9  -4 -19   12.76    1.69
  -5   9 -18   28.18    1.84
   9  -4 -18   33.24    2.51
  -5   9 -17   53.38    2.64
   9  -4 -17   53.54    3.24
  -5   9 -16   66.43    3.06
  -5   9 -15   47.07    2.69
  -4   9  15   46.57    2.59
  -5   9 -14   28.27    2.29
  -4   9  14   28.85    2.29
  -5   9 -13   93.13    3.85
  -4   9  13   91.97    4.02
  -5   9 -12   79.75    3.45
  -4   9  12   70.74    3.58
  -5   9 -11    2.49    2.01
  -4   9  11    4.98    1.84
  -5   9 -11    5.61    1.44
  -5   9 -10   93.33    3.74
  -5   9 -10  102.44    4.55
  -4   9  10   96.90    4.17
  -4   9  10  101.34    3.84
  -5   9  -9    6.14    1.92
  -4   9   9    9.20    1.49
  -4   9   9   10.13    1.86
  -5   9  -9    9.30    1.35
  -5   9  -8   92.82    3.41
  -4   9   8   90.22    3.86
  -4   9   8   89.89    3.63
  -4   9   7   36.54    2.43
  -4   9   7   38.63    2.24
  -4   9   6   57.56    2.75
  -4   9   5    2.83    1.27
  -4   9   5    3.10    1.41
  -4   9   4  235.02    7.08
  -5   9  -4  229.19    6.73
  -4   9   4  233.21    6.99
  -5   9  -3  374.00   10.34
  -4   9   3  352.61   10.47
  -4   9   2  275.45    7.88
  -5   9  -2  265.29    7.91
  -4   9   2  261.90    7.73
  -5   9  -2  256.72    7.58
  -4   9   1  213.08    6.48
  -4   9   1  207.00    6.29
  -5   9  -1  204.28    6.16
  -5   9  -1  209.86    6.49
  -4   9   1  210.73    6.28
  -5   9  -1  204.84    6.23
  -4   9   0   96.47    3.57
  -4   9   0  110.46    3.89
  -4   9   0   96.77    3.60
  -5   9   0   98.20    3.77
  -5   9   0   97.72    3.54
  -5   9   0  100.88    3.59
  -4   9  -1  145.33    4.66
  -5   9   1  149.36    4.89
  -4   9  -1  146.14    4.94
  -5   9   1  145.55    4.71
  -4   9  -1  140.59    4.68
  -5   9   1  147.19    4.79
  -4   9  -2  248.26    7.41
  -5   9   2  275.27    7.77
  -5   9   2  259.11    7.63
  -4   9  -2  263.98    7.53
  -5   9   2  266.32    7.66
  -4   9  -3  271.75    7.82
  -5   9   3  276.47    8.01
  -5   9   4  215.33    6.47
  -4   9  -4  202.09    6.13
  -5   9   4  206.13    6.35
  -5   9   5  223.66    6.94
  -5   9   5  223.53    6.85
  -5   9   6  177.85    5.73
  -5   9   7   27.79    2.16
  -5   9   7   26.07    1.98
  -5   9   8  109.12    4.35
  -5   9   8  111.61    4.14
  -5   9   9   32.04    2.38
  -5   9   9   32.23    2.14
  -4   9 -10   40.05    2.20
  -5   9  10   35.91    2.24
  -5   9  10   37.04    2.63
  -4   9 -11   92.25    3.63
  -5   9  11   95.51    4.11
  -5   9  11   89.15    3.58
  -4   9 -12   43.90    2.48
  -5   9  12   47.83    2.94
  -4   9 -13   48.92    2.68
  -5   9  13   58.71    3.16
  -5   9  14    7.73    1.77
  -4   9 -14    8.17    1.63
  -4   9 -15   45.31    2.56
  -5   9  15   47.37    2.68
  -4   9 -16   94.71    3.71
  -5   9  16   91.86    3.60
  -4   9 -17    9.98    1.47
   9  -5 -17   11.83    2.01
   9  -5 -18   92.11    3.84
  -4   9 -18   87.92    3.25
  -4   9 -19    0.04    0.89
   9  -5 -19    0.18    1.35
   9  -5 -20    4.06    0.99
  -6   9 -20   11.88    0.91
  -6   9 -19   21.08    1.43
  -6   9 -18    1.26    1.16
  -6   9 -17   67.67    2.99
   9  -3 -16   66.41    3.70
  -6   9 -16   63.72    3.07
  -3   9  15   15.14    1.66
  -6   9 -15   15.30    1.90
  -6   9 -14   29.06    3.03
  -6   9 -14   24.83    2.18
  -3   9  14   25.33    2.19
  -6   9 -13  148.22    5.98
  -3   9  13  144.15    5.35
  -6   9 -13  149.79    5.29
  -6   9 -12   30.83    3.05
  -3   9  12   28.74    2.45
  -6   9 -12   32.79    2.32
  -6   9 -11   75.91    3.43
  -3   9  11   78.94    3.73
  -6   9 -11   76.56    4.13
  -6   9 -10  106.61    4.08
  -3   9  10  112.31    4.42
  -3   9  10  104.06    4.00
  -6   9 -10  107.07    4.75
  -6   9  -9   90.76    3.53
  -6  -3   9   83.13    3.33
  -6   9  -9   88.99    4.16
  -3   9   9   96.81    4.00
  -3   9   9   90.35    3.62
  -6  -3   8  207.97    6.33
  -6   9  -8  207.80    6.43
  -6   9  -8  204.10    7.11
  -3   9   8  212.27    6.86
  -3   9   8  217.40    6.63
  -6   9  -7  196.71    6.05
  -3   9   7  199.42    6.52
  -3   9   7  203.68    6.33
  -6   9  -6  143.09    4.56
  -3   9   6  139.94    5.02
  -3   9   6  144.28    4.87
  -3   9   5  178.79    5.72
  -3   9   4  421.17   11.61
  -3   9   4  417.17   11.50
  -6   9  -4  408.95   11.25
  -3   9   3  374.82   10.22
  -3   9   3  359.43   10.08
  -6   9  -3  347.42    9.89
  -3   9   2  215.53    6.63
  -6   9  -2  220.97    6.50
  -3   9   1  240.95    7.18
  -3   9   1  236.73    6.99
  -6   9  -1  237.76    7.12
  -6   9  -1  221.06    6.74
  -3   9   1  234.15    6.95
  -6   9  -1  234.72    6.90
  -6   9   0  151.97    4.90
  -3   9   0  148.79    4.73
  -6   9   0  142.11    4.62
  -3   9   0  140.44    4.69
  -6   9   0  139.59    4.68
  -6   9   1  121.17    4.13
  -3   9  -1  114.12    3.99
  -6   9   1  115.79    4.15
  -6   9   1  120.76    4.05
  -3   9  -1  115.77    4.01
  -6   9   2  505.15   13.47
  -3   9  -2  500.67   13.29
  -6   9   2  497.31   13.48
  -3   9  -2  506.36   13.67
  -6   9   2  504.60   13.46
  -3   9  -2  478.43   13.33
  -6   9   3   50.90    2.42
  -3   9  -3   56.37    2.71
  -3   9  -3   50.74    2.32
  -6   9   3   46.95    2.44
  -6   9   4   58.50    2.64
  -3   9  -4   52.64    2.73
  -3   9  -4   50.84    2.33
  -6   9   4   51.17    2.57
  -6   9   5  638.82   16.79
  -3   9  -5  600.91   16.50
  -6   9   5  656.27   16.92
  -6   9   6   41.50    2.52
  -6   9   6   42.69    2.39
  -6   9   7   80.71    3.38
  -6   9   8   13.17    1.65
  -6   9   8   10.20    1.76
  -6   9   9   16.35    1.70
  -6   9   9   19.57    2.10
  -6   9  10   10.37    1.56
  -6   9  10    7.26    1.85
  -6   9  11  134.43    5.02
  -6   9  11  122.30    4.53
  -6   9  12  135.92    5.21
  -6   9  13   27.45    2.49
  -3   9 -13   27.04    2.02
  -3   9 -14   29.10    2.07
  -6   9  14   34.11    2.52
  -3   9 -15   44.26    2.45
  -6   9  15   45.35    2.68
   9  -6 -16   95.05    4.28
  -3   9 -16   90.92    3.59
  -6   9  16   98.86    3.76
  -3   9 -17   48.96    2.35
   9  -6 -17   47.24    2.94
   9  -6 -18   18.36    1.96
  -3   9 -18   19.44    1.42
   9  -6 -19    1.48    1.19
   9  -6 -20   11.49    1.03
   9  -2 -20   28.47    1.56
   9  -2 -19   32.25    2.05
  -7   9 -19   33.54    1.67
  -7   9 -18   52.53    2.41
   9  -2 -18   52.78    2.91
  -7   9 -17   28.36    1.99
   9  -2 -17   25.74    2.52
  -7   9 -16   87.82    3.63
   9  -2 -16   89.49    4.17
  -7   9 -15   59.63    3.74
  -7   9 -15   50.12    2.81
  -7   9 -14   39.65    3.37
  -7   9 -14   39.80    2.64
  -2   9  14   40.10    2.40
  -7   9 -13  173.72    6.07
  -2   9  13  184.32    6.13
  -7   9 -13  180.62    6.88
  -7   9 -12   56.65    3.03
  -2   9  12   60.25    3.17
  -7   9 -12   58.96    3.83
  -7   9 -11  123.42    4.79
  -2   9  11  136.71    5.11
  -7   9 -11  139.42    5.67
  -2   9  10   55.45    3.06
  -7   9 -10   55.01    2.83
  -2   9  10   51.46    2.68
  -7  -2   9  277.71    8.42
  -7   9  -9  297.89    8.65
  -2   9   9  297.73    8.98
  -2   9   9  298.53    8.70
  -7  -2   8  386.45   10.60
  -7   9  -8  381.29   10.68
  -2   9   8  387.91   11.08
  -7   9  -8  346.98   11.21
  -2   9   8  385.13   10.82
  -7   9  -7  243.49    7.24
  -7  -2   7  240.58    7.22
  -2   9   7  240.51    7.64
  -7   9  -7  249.04    7.95
  -2   9   7  247.58    7.48
  -7   9  -6   54.83    2.46
  -7  -2   6   53.97    2.58
  -2   9   6   52.70    2.83
  -7   9  -6   56.15    3.04
  -2   9   6   56.64    2.75
  -7   9  -5   99.29    3.51
  -2   9   5   99.13    3.82
  -2   9   4  388.94   11.13
  -7   9  -4  394.52   10.68
  -2   9   4  400.59   11.06
  -7   9  -4  393.18   10.78
  -2   9   3  174.33    5.67
  -7   9  -3  174.78    5.20
  -2   9   3  170.29    5.54
  -7   9  -3  172.13    5.38
  -7   9  -2  177.70    5.54
  -2   9   2  176.50    5.67
  -7   9  -1  162.26    5.18
  -2   9   1  161.31    5.25
  -2   9   1  161.35    5.23
  -7   9   0  399.50   11.22
  -2   9   0  441.84   11.54
  -2   9   0  403.34   11.24
  -7   9   0  400.86   11.29
  -2   9   0  404.15   11.24
  -7   9   0  401.66   11.10
  -7   9   1   97.53    3.57
  -2   9  -1   87.39    3.39
  -2   9  -1   95.43    3.70
  -2   9  -1   94.30    3.51
  -7   9   1   91.48    3.42
  -7   9   1   89.72    3.47
  -7   9   2  594.14   15.34
  -2   9  -2  543.71   15.12
  -7   9   2  565.87   15.21
  -2   9  -2  591.32   15.51
  -2   9  -2  571.96   15.23
  -7   9   2  566.63   15.27
  -2   9  -3  250.25    7.24
  -2   9  -3  259.63    7.66
  -2   9  -3  246.52    7.32
  -7   9   3  250.48    7.46
  -7   9   3  243.80    7.29
  -7   9   4  124.74    4.51
  -2   9  -4  131.83    4.67
  -2   9  -4  127.77    4.34
  -7   9   4  130.70    4.57
  -7   9   5  654.09   17.31
  -2   9  -5  648.92   17.44
  -2   9  -5  626.48   17.03
  -7   9   5  667.26   17.38
  -7   9   6  248.39    7.47
  -2   9  -6  240.70    7.54
  -7   9   6  239.73    7.52
  -7   9   7   93.60    3.73
  -2   9  -7   87.26    3.81
  -7   9   8   29.10    2.12
  -2   9  -8   24.05    2.17
  -7   9   8   28.76    2.35
  -7   9   9   39.12    2.66
  -7   9   9   35.01    2.28
  -7   9  10   88.86    3.93
  -7   9  10   85.15    3.59
  -7   9  11   39.08    2.79
  -7   9  11   36.88    2.29
  -7   9  12  101.93    4.43
  -2   9 -13   62.83    3.16
  -7   9  13   71.77    3.60
  -2   9 -14  119.41    4.66
  -7   9  14  143.93    5.06
  -7   9  15  179.93    6.03
  -7   9  16    3.82    1.42
   9  -7 -16    5.91    1.78
   9  -7 -17   62.60    3.07
   9  -7 -18   26.94    2.04
   9  -7 -19    4.07    1.08
  -8   9 -19    8.27    1.02
   9  -1 -19    7.89    1.26
  -8   9 -18   15.64    1.48
   9  -1 -18   19.56    1.91
  -8   9 -17   43.73    2.34
   9  -1 -17   42.21    2.75
  -8   9 -16   11.61    2.42
   9  -1 -16   12.93    2.10
  -8   9 -16   12.76    1.69
  -8   9 -15  116.13    4.46
   9  -1 -15  121.20    4.95
  -8   9 -15  118.16    5.26
  -8   9 -14   44.83    2.76
  -1   9  14   46.72    2.51
  -8   9 -14   48.99    3.60
  -8   9 -13   23.26    3.01
  -1   9  13   19.71    1.96
  -8   9 -13   21.37    2.17
  -8  -1  13   21.12    1.94
  -8  -1  12   25.05    2.15
  -8   9 -12   25.93    2.26
  -1   9  12   26.92    2.17
  -8   9 -11  107.86    4.36
  -1   9  11  111.33    4.49
  -8   9 -10   15.36    2.66
  -1   9  10   16.38    2.03
  -1   9  10   17.12    1.72
  -8  -1  10   18.30    1.68
  -8   9 -10   14.00    1.91
  -8  -1   9  463.77   13.07
  -8   9  -9  482.72   13.24
  -1   9   9  487.09   13.54
  -8   9  -9  468.25   13.93
  -1   9   9  484.24   13.28
  -8  -1   8  497.43   13.72
  -8   9  -8  504.41   13.79
  -1   9   8  490.55   14.07
  -8   9  -8  506.91   14.48
  -1   9   8  515.54   13.93
  -8   9  -7   32.90    2.08
  -8  -1   7   32.85    2.14
  -1   9   7   32.44    2.45
  -8   9  -7   33.86    2.72
  -1   9   7   35.67    2.31
  -8  -1   6  119.18    4.28
  -8   9  -6  119.72    4.22
  -1   9   6  120.06    4.56
  -8   9  -6  120.49    4.80
  -1   9   6  120.11    4.45
  -8   9  -5  329.75    9.29
  -8  -1   5  326.16    9.40
  -1   9   5  315.96    9.61
  -8   9  -5  339.06    9.90
  -1   9   5  337.01    9.60
  -8   9  -4  100.52    3.66
  -8  -1   4  109.67    3.91
  -8   9  -4  106.08    3.71
  -1   9   4  104.64    4.02
  -8   9  -3   18.10    1.53
  -1   9   3   15.14    1.72
  -1   9   3   16.96    1.78
  -8   9  -2    2.45    1.13
  -1   9   2    3.62    1.37
  -8   9  -1   67.62    2.92
  -1   9   1   64.80    2.92
  -1   9   1   67.46    3.01
  -8   9   0   95.23    3.64
  -8   9   0   95.01    3.60
  -1   9   0   95.48    3.65
  -1   9   0   98.13    3.69
  -8   9   0   91.97    3.42
  -8   9   1  256.73    7.43
  -8   9   1  237.18    7.23
  -1   9  -1  239.99    7.30
  -1   9  -1  253.35    7.56
  -1   9  -1  242.18    7.36
  -8   9   1  246.57    7.27
  -8   9   2  152.24    5.09
  -1   9  -2  146.52    4.86
  -1   9  -2  147.89    5.15
  -1   9  -2  152.01    5.00
  -8   9   2  146.27    4.93
  -1   9  -3  198.30    6.10
  -1   9  -3  206.72    6.48
  -1   9  -3  197.15    6.22
  -8   9   3  199.56    6.29
  -8   9   4  873.43   23.59
  -1   9  -4  926.00   23.77
  -1   9  -4  905.59   23.49
  -8   9   4  918.05   23.65
  -8   9   5   78.66    3.42
  -1   9  -5   74.73    3.35
  -8   9   5   75.78    3.40
  -8   9   6  495.30   13.75
  -1   9  -6  486.54   13.77
  -8   9   6  513.38   13.89
  -8   9   7  100.19    3.94
  -1   9  -7   96.87    3.93
  -8   9   7   89.61    4.01
  -8   9   8    6.35    1.56
  -1   9  -8    5.95    1.54
  -8   9   9   54.60    2.88
  -1   9  -9   54.12    2.86
  -8   9   9   55.96    3.20
  -1   9 -10   99.15    4.04
  -8   9  10  104.50    4.45
  -8   9  10  101.81    4.05
  -8   9  11   21.61    1.91
  -8   9  11   20.96    2.38
  -1   9 -11   18.73    1.90
  -8   9  12   21.93    1.87
  -8   9  12   29.69    2.50
  -8   9  13   53.49    3.15
  -8   9  14  183.21    6.28
  -8   9  15   36.62    2.42
   9  -8 -16   47.75    2.68
  -8   9  16   51.41    2.63
   9  -8 -17   19.46    1.79
   9  -8 -18   10.92    1.28
  -9   9 -19    0.68    0.71
   9   0 -19   -0.12    0.77
  -9   9 -18   14.63    1.35
   9   0 -18   13.74    1.55
   9   0 -17   71.01    3.23
  -9   9 -17   68.05    2.87
  -9   9 -16   26.51    2.68
  -9   9 -16   30.63    2.14
   9   0 -16   24.66    2.37
  -9   9 -15   49.43    2.69
   9   0 -15   51.75    3.09
  -9   9 -15   48.84    3.45
  -9   0  14  101.87    3.95
  -9   9 -14  109.09    4.20
   9   0 -14  104.87    4.57
  -9   0  13  117.02    4.44
  -9   9 -13  118.85    4.60
   0   9  13  114.33    4.34
  -9   0  12  112.75    4.33
  -9   9 -12  105.83    4.28
   0   9  12  104.11    4.22
  -9   9 -12  101.70    5.16
   0   9  11  171.69    5.83
  -9   9 -11  160.42    6.50
  -9   9 -11  160.10    5.74
  -9   0  10  152.99    5.37
  -9   9 -10  168.74    5.73
   0   9  10  171.82    5.86
  -9   9 -10  164.75    6.36
  -9   0   9  327.98    9.66
  -9   9  -9  342.15    9.83
   0   9   9  337.49    9.99
  -9   9  -9  324.85   10.46
  -9   0   8  462.29   13.05
  -9   9  -8  476.12   13.07
   0   9   8  470.53   13.32
  -9   9  -8  459.77   13.69
   0   9   8  479.01   13.21
  -9   0   7   42.20    2.50
  -9   9  -7   41.32    2.50
   0   9   7   43.92    2.74
  -9   9  -7   43.25    2.95
   0   9   7   46.89    2.67
  -9   9  -6  209.21    6.59
  -9   0   6  215.44    6.73
   0   9   6  217.96    6.95
  -9   9  -6  201.20    7.09
   0   9   6  216.97    6.87
  -9   9  -5  263.69    7.80
  -9   0   5  269.14    8.00
   0   9   5  265.15    8.15
  -9   9  -5  257.65    8.27
   0   9   5  267.21    8.11
  -9   9  -4   26.98    1.80
  -9   0   4   27.89    2.06
   0   9   4   25.20    2.08
  -9   9  -3   18.64    1.62
   0   9   3   16.81    1.85
  -9   0   3   17.79    1.76
   0   9   3   16.00    1.84
  -9   9  -2   -0.14    1.13
   0   9   2    0.85    1.35
  -9   9  -1   78.60    3.26
  -9   0   1   83.32    3.25
   0   9   1   80.19    3.36
  -9   9   0    2.64    1.34
   0   9   0    5.18    1.34
  -9   9   0    3.95    1.17
  -9   0   0    3.69    1.33
   0   9   0    4.72    1.46
  -9   9   1  445.94   12.08
  -9   0  -1  427.07   11.84
   0   9  -1  431.61   11.97
   0   9  -1  423.69   12.04
  -9   9   1  430.29   11.90
  -9   9   2  128.84    4.62
  -9   0  -2  129.03    4.38
   0   9  -2  127.62    4.57
  -9   9   2  121.88    4.44
  -9   9   3    4.92    1.66
  -9   9   3    3.62    1.43
  -9   0  -3    6.29    1.25
   0   9  -3    4.30    1.42
  -9   0  -4 1330.01   33.64
   0   9  -4 1300.28   33.98
  -9   9   4 1347.81   34.05
  -9   9   5  680.18   18.55
  -9   0  -5  690.80   18.12
  -9   9   5  711.54   18.65
   0   9  -5  686.05   18.48
  -9   9   6    6.37    1.72
  -9   9   6    4.79    1.76
  -9   0  -6    7.00    1.13
   0   9  -6    9.01    1.62
  -9   9   7   86.26    3.78
   0   9  -7   84.18    3.57
  -9   9   7   87.99    3.89
  -9   9   8   86.95    3.77
   0   9  -8   83.42    3.49
  -9   9   9    1.03    1.54
  -9   9   9    1.66    2.01
   0   9  -9    2.11    1.27
  -9   9  10  117.35    4.45
  -9   9  10  115.03    4.85
  -9   9  11   20.16    1.96
  -9   9  11   20.01    2.43
  -9   9  12   17.41    1.70
  -9   9  12   17.15    2.31
  -9   9  13   55.63    3.35
  -9   9  14   74.79    3.58
  -9   9  15    2.17    1.58
   9  -9 -15    3.65    1.35
   9  -9 -16   67.82    2.97
  -9   9  16   82.77    3.25
  -9   9  17   10.87    1.23
  -9   0 -19   46.85    2.22
 -10   9 -18   24.29    1.39
   9   1 -18   19.15    1.29
 -10   9 -17    9.80    1.35
   9   1 -17    9.29    1.39
 -10   9 -16   22.71    1.81
   9   1 -16   18.93    1.85
 -10   9 -15  101.76    3.93
   9   1 -15  100.47    4.05
 -10   9 -14   34.07    3.08
 -10   1  14   32.14    2.17
 -10   9 -14   32.78    2.36
   9   1 -14   34.53    2.51
 -10   1  13   91.75    3.89
   9   1 -13   88.40    3.98
 -10   9 -13   96.41    4.67
 -10   9 -13   94.61    3.97
   1   9  12    4.37    1.47
 -10   9 -12    6.97    1.88
 -10   1  12    7.62    1.87
 -10   9 -12    5.57    2.31
 -10   9 -11   27.94    2.98
 -10   1  11   24.11    1.88
   1   9  11   29.97    2.33
 -10   9 -11   27.18    2.39
 -10   1  11   26.50    2.48
 -10   1  10  191.18    6.29
 -10   9 -10  212.20    6.65
   1   9  10  194.06    6.61
 -10   9 -10  196.03    7.21
 -10   1   9  392.34   11.37
   1   9   9  397.08   11.58
 -10   9  -9  399.60   12.07
 -10   9  -9  407.94   11.49
 -10   9  -8    8.00    2.10
   1   9   8    5.59    1.73
 -10   1   8    5.65    1.70
 -10   9  -8    5.64    1.66
 -10   1   7  127.70    4.74
 -10   9  -7  129.62    4.64
   1   9   7  126.17    4.87
 -10   9  -7  122.09    5.11
 -10   1   6  175.61    5.94
 -10   9  -6  173.44    5.75
   1   9   6  171.24    6.01
 -10   9  -6  175.03    6.23
 -10   1   5   46.70    2.71
   1   9   5   43.38    2.70
 -10   9  -5   42.46    2.72
 -10   9  -4   68.73    2.97
 -10   1   4   67.83    3.22
   1   9   4   66.13    3.29
 -10   9  -3   37.75    2.26
 -10   9  -2   36.69    2.30
   1   9   2   40.92    2.54
 -10   9  -1   38.68    2.35
 -10   1   1   31.95    2.26
   1   9   1   34.19    2.36
 -10   9   0   69.18    3.23
 -10   1   0   72.81    3.18
 -10   9   0   68.18    2.94
 -10   9   1   58.41    2.96
 -10   1  -1   57.56    2.78
 -10   9   1   55.71    2.71
 -10   9   2    5.18    1.64
 -10   1  -2    5.56    1.43
 -10   9   2    5.98    1.39
 -10   9   3  249.38    7.66
 -10   1  -3  235.82    7.27
 -10   9   3  245.91    7.56
 -10   1  -4  114.51    4.08
 -10   9   4  107.91    4.36
 -10   9   5  417.49   11.96
 -10   1  -5  410.95   11.45
 -10   9   5  421.37   11.96
 -10   9   6  322.13    9.57
 -10   9   6  308.33    9.55
 -10   9   7   18.77    2.17
 -10   9   7   16.42    2.23
 -10   9   8   98.77    4.24
 -10   9   9  173.28    5.96
 -10   9  10    0.96    1.49
 -10   9  10    1.42    2.02
 -10   9  11   36.52    2.43
 -10   9  11   41.00    3.00
 -10   9  12   30.00    2.78
 -10   9  12   28.15    2.08
 -10   9  13    4.33    1.85
 -10   9  14   66.77    3.36
 -10   9  15   24.31    2.12
 -10   9  16   57.44    2.67
 -10   9  17    1.04    0.90
 -10   1 -18   22.61    1.72
 -11   9 -16   21.95    1.64
 -11   9 -15   72.50    2.97
   9   2 -15   64.06    2.80
 -11   9 -15   69.80    3.50
 -11   2  15   66.64    2.77
 -11   2  14   45.90    2.50
 -11   9 -14   44.71    2.51
   9   2 -14   41.44    2.43
 -11   9 -13   10.03    2.26
 -11   9 -13   10.34    1.76
 -11   2  13    8.28    1.79
   9   2 -13    7.43    1.57
 -11   2  12   59.92    3.32
 -11   9 -12   61.91    3.09
   9   2 -12   56.31    2.91
 -11   9 -12   61.31    3.75
 -11   9 -11   19.68    2.60
 -11   2  11   19.34    1.84
 -11   9 -11   20.33    2.11
 -11   2  11   19.10    2.48
 -11   2  10   59.70    3.36
 -11   2  10   53.78    2.95
 -11   9 -10   58.79    3.11
 -11   9 -10   59.62    3.64
 -11   2   9   49.27    3.15
 -11   2   9   44.44    2.69
 -11   9  -9   45.35    2.73
 -11   9  -9   41.68    3.21
 -11   9  -8    7.20    2.00
   2   9   8   11.97    2.00
 -11   2   8    9.16    1.80
 -11   9  -8   11.05    1.85
 -11   9  -7   25.90    2.50
 -11   2   7   25.11    2.28
   2   9   7   27.09    2.36
 -11   2   6   60.83    3.21
 -11   9  -6   59.73    3.30
   2   9   6   65.70    3.28
   2   9   5   12.92    1.99
 -11   2   5   16.67    2.09
 -11   9  -4   84.13    3.55
 -11   2   4   93.79    4.01
   2   9   4   96.06    3.99
 -11   9  -3   76.13    3.31
 -11   9  -2   23.85    1.99
 -11   2   2   25.08    2.22
 -11   9  -1   70.75    3.27
 -11   2   1   69.19    3.34
 -11   9   0  181.01    6.22
 -11   2   0  192.16    6.24
 -11   9   0  189.24    6.00
 -11   9   1   44.16    2.69
 -11   2  -1   39.24    2.49
 -11   9   1   42.92    2.45
 -11   9   2   20.36    2.19
 -11   2  -2   22.72    2.00
 -11   9   2   21.08    1.95
 -11   9   3  130.51    4.99
 -11   2  -3  134.60    4.73
 -11   9   3  129.86    4.87
 -11   2  -4   64.38    2.95
 -11   9   4   58.66    3.21
 -11   9   5   15.05    2.27
 -11   2  -5   13.99    1.61
 -11   9   5   14.04    2.07
 -11   9   6  307.12    9.37
 -11   9   6  298.49    9.32
 -11   9   7  366.61   10.82
 -11   9   7  361.35   10.96
 -11   9   8   39.87    2.78
 -11   9   8   40.29    2.98
 -11   9   9   53.54    3.10
 -11   9  10   13.79    1.95
 -11   9  10   17.63    2.62
 -11   9  11    5.97    1.63
 -11   9  11    5.00    2.17
 -11   9  12   25.57    2.55
 -11   9  12   27.84    2.03
 -11   9  13   40.41    2.80
 -11   9  14   27.55    2.31
 -11   9  15   41.52    2.45
 -11   2 -16    7.51    1.64
 -11   9  16    7.56    1.35
 -11   2 -17    8.19    1.42
 -11   2 -18   23.45    1.43
 -12   3  15   17.44    1.49
 -12   9 -14   13.42    2.01
 -12   3  14   17.34    1.75
 -12   3  13   63.88    3.14
 -12   9 -13   61.49    3.42
 -12   3  12   44.08    2.89
 -12   9 -12   40.89    2.99
 -12   3  11  100.06    4.38
 -12   3  11   94.84    3.78
 -12   9 -11  103.43    4.58
 -12   3  10  177.15    6.37
 -12   3  10  179.86    5.91
 -12   9 -10  174.11    6.41
 -12   3   9   47.54    3.32
 -12   3   9   45.81    2.78
 -12   9  -9   49.51    3.14
 -12   3   8   69.69    3.95
 -12   3   8   77.91    3.66
 -12   9  -8   71.50    3.71
 -12   3   7  108.81    4.44
 -12   9  -7  106.06    4.52
 -12   3   6    4.67    1.83
 -12   3   5   40.81    2.73
 -12   9  -4   56.60    2.81
 -12   3   4   55.11    3.28
 -12   9  -3   31.50    2.22
 -12   9  -2  104.62    4.17
 -12   3   2  105.51    4.42
 -12   9  -1  101.79    4.23
 -12   3   1  104.33    4.31
 -12   9   0   55.41    3.10
 -12   3   0   53.01    2.99
 -12   9   0   55.24    2.71
 -12   9   1  140.91    5.26
 -12   3  -1  143.97    5.13
 -12   9   1  135.09    4.94
 -12   9   2  110.90    4.43
 -12   9   2  114.78    4.71
 -12   3  -2  123.67    4.50
 -12   9   3   17.46    2.34
 -12   3  -3   15.15    1.86
 -12   9   3   17.42    2.02
 -12   9   4   76.78    3.76
 -12   3  -4   81.18    3.38
 -12   9   5   86.63    3.92
 -12   9   5   75.69    3.97
 -12   3  -5   77.87    3.27
 -12   9   6   18.97    2.41
 -12   9   6   15.58    2.31
 -12   9   7  189.03    6.63
 -12   9   7  189.88    6.77
 -12   9   8  133.02    5.29
 -12   9   8  144.91    5.52
 -12   9   9   42.06    2.84
 -12   9  10   71.06    3.43
 -12   9  11   62.68    3.09
 -12   9  11   65.19    3.54
 -12   9  12    2.26    1.31
 -12   9  12    1.71    2.05
 -12   3 -13   47.38    2.78
 -12   9  13   55.53    2.99
 -12   3 -14   14.70    1.82
 -12   9  14   19.17    2.06
 -12   3 -15    3.51    1.47
 -12   9  15    5.15    1.47
 -12   3 -16   12.26    1.41
 -12   9  16    7.38    1.13
 -12   3 -17    5.02    0.94
 -13   4  15    4.50    0.97
 -13   4  14   14.46    1.55
 -13   4  13   18.43    1.92
 -13   4  12   29.72    2.38
 -13   4  12   23.87    1.70
 -13   9 -12   30.16    2.36
 -13   9 -11   26.52    2.35
 -13   4  11   33.63    2.69
 -13   4  11   28.66    2.01
 -13   4  10  112.27    4.56
 -13   4  10  106.47    4.11
 -13   9 -10  101.67    4.31
 -13   4   9   43.61    3.10
 -13   4   9   41.36    2.66
 -13   9  -9   41.44    2.73
 -13   4   8   29.99    2.55
 -13   4   7   41.44    2.99
 -13   4   7   30.19    2.55
 -13   4   6   28.51    2.65
 -13   4   6   28.91    2.63
 -13   4   5   70.20    3.81
 -13   4   5   81.51    3.88
 -13   9  -4    1.47    1.31
 -13   4   4    1.64    1.87
 -13   9  -3    6.80    1.65
 -13   4   3    7.50    1.91
 -13   4   3    8.30    2.21
 -13   9  -2  198.35    6.57
 -13   4   2  199.06    6.74
 -13   9  -1  159.68    5.82
 -13   4   1  170.74    5.96
 -13   9   0   42.63    2.86
 -13   4   0   41.18    2.82
 -13   9   1   39.80    2.85
 -13   4  -1   37.94    2.56
 -13   9   1   39.58    2.44
 -13   9   2   87.19    3.85
 -13   9   2   97.32    4.29
 -13   4  -2   91.04    3.89
 -13   9   3   17.59    2.44
 -13   4  -3   18.72    1.82
 -13   9   3   17.34    2.11
 -13   4  -4   -0.07    1.40
 -13   9   4    1.23    1.75
 -13   4  -5   10.86    1.49
 -13   9   5    9.96    2.12
 -13   9   6   14.80    2.45
 -13   9   6   10.75    2.17
 -13   9   7    4.17    2.13
 -13   9   7    4.82    2.19
 -13   9   8   87.24    4.05
 -13   9   8   84.02    4.18
 -13   9   9   50.99    3.03
 -13   9   9   56.91    3.46
 -13   9  10   12.91    1.90
 -13   9  11   53.87    2.73
 -13   4 -11   47.82    2.58
 -13   9  11   50.51    3.11
 -13   9  12   31.21    1.97
 -13   9  12   36.96    2.59
 -13   4 -12   31.16    2.11
 -13   4 -13    7.23    1.43
 -13   9  13   10.39    1.90
 -13   4 -14   14.80    1.51
 -13   9  14   18.53    1.82
 -13   4 -15    3.11    1.01
 -13   9  15    1.38    1.13
 -14   5  14    9.29    1.16
 -14   5  13    1.42    1.36
 -14   5  12   47.39    2.65
 -14   5  11   56.58    3.03
 -14   5  11   49.84    2.46
 -14   5  10    5.21    1.54
 -14   5  10    6.37    2.05
 -14   5   9   37.70    2.51
 -14   5   8  113.45    4.87
 -14   5   8  115.26    4.57
 -14   5   7   17.31    2.20
 -14   5   7   16.64    2.45
 -14   5   6   66.08    3.76
 -14   5   6   77.06    3.76
 -14   5   5   86.04    4.03
 -14   5   5   79.14    4.04
 -14   9  -4    4.70    1.39
 -14   5   4    3.11    1.84
 -14   9  -3   56.83    2.94
 -14   5   3   62.57    3.27
 -14   5   3   55.92    3.36
 -14   9  -2   73.40    3.44
 -14   5   2   72.45    3.52
 -14   5   2   71.39    3.69
 -14   9  -1   38.96    2.68
 -14   5   1   34.40    2.44
 -14   5   1   38.73    2.78
 -14   5   0   18.24    2.27
 -14   5   0   23.86    1.97
 -14   9   0   20.41    2.29
 -14   9   1   51.78    3.20
 -14   5  -1   53.22    2.66
 -14   5  -1   56.95    3.05
 -14   9   1   54.07    2.80
 -14   5  -2   37.71    2.51
 -14   9   2   33.15    2.80
 -14   9   2   36.44    2.45
 -14   9   3   72.45    3.48
 -14   9   3   76.23    3.98
 -14   5  -3   76.91    3.38
 -14   9   4   25.83    2.80
 -14   5  -4   19.30    1.80
 -14   9   4   23.36    2.34
 -14   9   5    3.56    1.86
 -14   9   6   13.94    2.38
 -14   9   6   12.03    2.18
 -14   9   7   95.53    4.28
 -14   9   7   95.61    4.29
 -14   9   8    7.30    1.93
 -14   9   8    7.48    2.16
 -14   9   9   73.76    3.58
 -14   9   9   79.93    3.75
 -14   9  10  135.60    4.81
 -14   9  11   -0.25    1.27
 -14   9  12   71.21    3.19
 -14   9  12   64.31    2.64
 -14   9  13   23.26    1.91
 -14   9  14    7.68    1.27
 -15   6  13    6.29    1.07
 -15   6  12   13.80    1.53
 -15   6  11   25.55    1.67
 -15   6  11   33.60    2.24
 -15   6  10    1.81    1.31
 -15   6   9   31.95    2.48
 -15   6   9   29.64    2.18
 -15   6   8   51.76    3.01
 -15   6   8   47.53    2.72
 -15   6   7   16.01    2.08
 -15   6   7   18.55    2.31
 -15   6   6   65.37    3.38
 -15   6   6   59.91    3.26
 -15   6   5   56.30    3.19
 -15   6   4   61.62    3.22
 -15   9  -3   52.03    2.65
 -15   6   3   49.60    2.87
 -15   6   3   53.08    3.18
 -15   9  -2  102.81    4.03
 -15   6   2   92.42    3.97
 -15   6   2  104.89    4.33
 -15   6   1   93.89    3.84
 -15   9  -1   98.04    4.09
 -15   6   1   99.13    4.20
 -15   6   0  125.71    4.55
 -15   9   0  137.44    5.05
 -15   6   0  133.75    4.94
 -15   9   1  125.57    4.86
 -15   6  -1  125.67    4.60
 -15   9   1  114.15    4.27
 -15   9   2   25.88    2.57
 -15   6  -2   20.35    2.01
 -15   9   2   25.68    2.02
 -15   9   3   48.32    3.17
 -15   6  -3   48.28    2.53
 -15   9   3   49.60    2.72
 -15   6  -4   32.39    1.97
 -15   9   4   29.69    2.37
 -15   9   5    4.22    1.73
 -15   9   6    1.83    2.00
 -15   9   6    1.69    1.82
 -15   9   7   22.41    2.33
 -15   9   7   26.60    2.37
 -15   9   8   37.57    2.61
 -15   9   8   38.50    2.67
 -15   9   9    2.30    1.56
 -15   9   9    0.98    1.59
 -15   9  10   59.96    2.76
 -15   9  10   65.91    3.21
 -15   9  11   56.48    2.41
 -15   9  12   11.15    1.51
 -15   9  13   38.43    1.91
 -16   7  12   13.88    1.10
 -16   7  10   10.36    1.22
 -16   7  10   14.42    1.59
 -16   7   9   33.57    2.03
 -16   7   9   38.35    2.25
 -16   7   8    1.22    1.39
 -16   7   8    2.44    1.46
 -16   7   7   21.12    2.07
 -16   7   7   22.62    2.12
 -16   7   6   37.37    2.39
 -16   7   6   38.38    2.55
 -16   7   5   11.59    1.76
 -16   7   4   28.75    2.14
 -16   7   4   32.20    2.53
 -16   7   3   50.32    2.62
 -16   9  -3   47.83    2.42
 -16   7   3   56.77    3.00
 -16   9  -2   -0.20    1.36
 -16   7   2   -0.15    1.75
 -16   7   2   -0.91    1.26
 -16   7   1   25.46    1.82
 -16   7   1   27.11    2.28
 -16   9  -1   23.25    2.06
 -16   9   0   46.68    2.71
 -16   7   0   46.93    2.69
 -16   9   1    9.76    1.84
 -16   7  -1    6.82    1.62
 -16   9   2   35.11    2.53
 -16   7  -2   31.70    2.15
 -16   9   2   31.42    2.00
 -16   7  -3   12.60    1.52
 -16   9   3   12.96    1.57
 -16   9   4   10.40    2.04
 -16   9   5   11.60    1.63
 -16   9   6   18.09    2.03
 -16   9   6   16.75    1.82
 -16   9   7    4.96    1.69
 -16   9   7    3.94    1.55
 -16   9   8   16.90    1.86
 -16   9   8   23.45    1.95
 -16   9   9   37.95    2.13
 -16   9   9   36.35    2.20
 -16   9  10    7.41    1.16
 -16   9  10    8.59    1.38
 -16   9  11   49.35    2.23
 -17   8   9   12.79    1.05
 -17   8   9   14.43    1.19
 -17   8   8    3.56    1.07
 -17   8   8    3.42    1.06
 -17   8   7    4.83    1.27
 -17   8   7    5.75    1.18
 -17   8   6    1.46    1.42
 -17   8   6    2.65    1.18
 -17   8   5   14.94    1.44
 -17   8   4    0.81    1.53
 -17   8   4    1.55    1.47
 -17   8   3   35.21    2.22
 -17   8   3   30.15    1.75
 -17   9  -2   12.56    1.38
 -17   8   2   16.09    1.82
 -17   9  -1    7.77    1.39
 -17   8   1    8.56    1.62
 -17   9   0   47.55    2.44
 -17   8   0   47.15    2.40
 -17   8  -1   21.55    1.67
 -17   9   1   21.03    1.89
 -17   8  -2   24.00    1.64
 -17   9   2   28.74    2.20
 -17   9   3   19.73    1.90
 -17   9   4   10.44    1.73
 -17   9   4    9.69    1.27
 -17   9   5    4.73    1.20
 -17   9   6    0.90    1.40
 -17   9   6    1.77    1.12
 -17   9   7    5.82    1.35
 -17   9   7    5.40    1.15
 -17   9   8    2.03    1.04
 -17   9   8    0.09    0.94
 -17   9   9   17.18    1.17
 -17   9   9   18.08    1.29
 -18   9   0    4.55    0.97
 -18   9  -1   18.12    1.16
 -18   9   1   19.49    1.39
 -18   9   2    5.93    1.16
 -18   9   3    9.08    1.25
 -18   9   4    2.65    1.06
 -18   9   5    4.09    1.02
  -5  10   0  123.92    4.49
  -5  10   0  119.81    4.21
  -5  10   0  116.96    4.28
  -5  10  -1  224.30    6.87
  -5  10   1  228.39    7.09
  -5  10  -1  219.38    6.74
  -5  10  -1  226.30    7.10
  -5  10   1  223.39    6.89
  -5  10   1  234.19    6.96
  -5  10   2  253.76    7.64
  -5  10  -2  248.15    7.73
  -5  10   2  250.40    7.54
  -5  10  -2  244.08    7.40
  -5  10   2  250.21    7.53
  -5  10   3   36.60    2.28
  -5  10  -3   37.15    2.07
  -5  10   4  265.65    7.86
  -5  10  -4  244.71    7.43
  -5  10   4  258.00    7.74
  -5  10   5  119.77    4.60
  -5  10   5  123.13    4.49
  -5  10   6   33.77    2.32
  -5  10   7   75.27    3.39
  -5  10   8  230.55    7.67
  -5  10   8  244.24    7.46
  -5  10   9   45.56    2.93
  -5  10   9   43.78    2.58
  -5  10  10  111.52    4.79
  -5  10  10  119.52    4.43
  -5  10 -11   38.61    2.22
  -5  10  11   41.93    2.91
  -5  10  11   37.25    2.33
  -5  10  12   30.73    2.63
  -5  10 -12   27.38    1.93
  -5  10 -13   74.89    3.26
  -5  10  13   80.57    3.77
  -5  10 -14   64.54    2.94
  -5  10  14   67.06    3.34
  -5  10  15   14.84    1.77
  -5  10 -15   15.35    1.57
  -5  10 -16   67.43    2.83
  -5  10  16   72.33    2.94
  10  -5 -17   55.15    3.01
  -5  10 -17   54.38    2.59
  -5  10 -17   46.89    2.18
  10  -5 -18   29.23    2.20
  10  -5 -19    1.26    1.15
  -6  10 -18    4.23    0.91
  -6  10 -18    3.22    1.16
  -6  10 -17   72.35    2.83
  -6  10 -16   16.39    1.59
  -4  10  15   16.26    1.74
  -6  10 -15   14.57    1.68
  -6  10 -14  107.39    4.16
  -4  10  14  118.76    4.48
  -4  10  13   12.62    1.99
  -6  10 -13   10.07    1.57
  -4  10  12   59.46    3.26
  -6  10 -12   49.02    2.66
  -6  10 -11   76.12    3.30
  -4  10  11   73.70    3.81
  -4  10  11   80.17    3.37
  -6  10 -10   49.64    2.54
  -4  10  10   54.97    2.73
  -6  10  -9  179.52    5.82
  -6  -4   9  183.54    5.80
  -4  10   9  198.85    6.58
  -4  10   9  187.16    6.13
  -6  -4   8  274.07    7.87
  -4  10   8  263.49    8.14
  -4  10   8  262.28    8.42
  -4  10   7   36.48    2.59
  -4  10   7   39.98    2.44
  -4  10   6  107.87    4.16
  -4  10   5   82.27    3.68
  -4  10   5   85.50    3.56
  -4  10   4  130.31    4.75
  -4  10   4  132.16    4.68
  -6  10  -4  128.85    4.39
  -6  10  -3    9.54    1.35
  -4  10   3    8.51    1.56
  -6  10  -2  391.32   11.26
  -4  10   2  390.09   11.05
  -4  10   2  398.86   11.13
  -6  10  -2  392.86   10.94
  -4  10   1   83.71    3.54
  -4  10   1   78.07    3.29
  -6  10  -1   78.80    3.44
  -6  10  -1   82.57    3.14
  -4  10   1   81.21    3.34
  -6  10  -1   78.99    3.27
  -4  10   0   13.25    1.53
  -6  10   0   14.35    1.57
  -4  10   0   12.79    1.49
  -6  10   0   12.70    1.41
  -4  10   0   14.48    1.78
  -6  10   0   12.62    1.66
  -4  10  -1  418.78   11.36
  -6  10   1  413.31   11.59
  -6  10   1  400.06   11.40
  -4  10  -1  413.77   11.41
  -6  10   1  407.93   11.48
  -4  10  -2   14.53    1.52
  -6  10   2   16.24    1.69
  -4  10  -2   15.30    1.44
  -6  10   2   17.68    1.70
  -6  10   2   15.41    1.73
  -4  10  -3   13.14    1.47
  -6  10   3   14.07    1.65
  -4  10  -3   11.87    1.76
  -4  10  -4  304.34    9.04
  -6  10   4  302.40    8.86
  -4  10  -4  283.75    8.53
  -6  10   4  300.08    8.78
  -6  10   5   14.94    1.78
  -6  10   5   14.05    1.85
  -4  10  -5   16.38    1.96
  -4  10  -5   15.29    1.47
  -6  10   6    5.35    1.53
  -6  10   6    5.39    1.67
  -6  10   7  232.37    7.30
  -6  10   8  100.94    4.40
  -6  10   8  114.61    4.30
  -6  10   9   23.22    2.08
  -6  10   9   20.70    2.34
  -6  10  10  157.82    5.85
  -6  10  10  156.62    5.43
  -6  10  11   62.41    3.46
  -6  10  11   64.92    3.03
  -6  10  12   29.40    2.52
  -6  10  13   59.89    3.35
  -6  10  14    3.43    1.63
  -6  10  15   16.05    1.87
  -4  10 -15   13.61    1.89
  -4  10 -16   81.50    3.50
  -6  10  16   95.87    3.54
  10  -6 -17    1.99    1.68
  10  -6 -18    7.12    1.90
  10  -6 -19   16.94    1.40
  10  -3 -19    9.59    1.27
  -7  10 -18   20.73    1.41
  10  -3 -18   19.28    1.90
  -7  10 -17   44.68    2.19
  10  -3 -17   44.58    2.83
  -7  10 -16   30.17    1.98
  10  -3 -16   24.40    2.49
  -7  10 -15   38.40    2.32
  -3  10  15   38.05    2.23
  -7  10 -14   56.75    2.88
  -3  10  14   58.29    2.93
  -7  10 -13   83.06    3.60
  -3  10  13   92.93    3.93
  -7  10 -12  185.78    6.09
  -3  10  12  183.02    6.42
  -7  10 -11  103.55    4.05
  -3  10  11  107.02    4.43
  -3  10  11  102.30    3.99
  -7  10 -10   72.56    3.22
  -3  10  10   75.50    3.79
  -7  10  -9  343.59    9.98
  -7  -3   9  347.51    9.93
  -3  10   9  356.25   10.57
  -3  10   9  357.38   10.25
  -7  10  -8  226.91    6.95
  -7  -3   8  230.27    7.00
  -3  10   8  232.89    7.28
  -3  10   8  231.94    7.57
  -7  10  -7   40.50    2.18
  -7  -3   7   42.70    2.31
  -3  10   7   42.82    2.76
  -3  10   7   40.57    2.54
  -7  10  -6  166.20    5.23
  -3  10   6  165.24    5.65
  -3  10   5   80.26    3.48
  -3  10   4  338.10    9.91
  -3  10   4  333.93    9.78
  -7  10  -4  337.80    9.51
  -3  10   3  173.33    5.61
  -3  10   3  154.04    5.42
  -7  10  -3  163.48    5.30
  -3  10   2  397.97   11.20
  -7  10  -2  387.89   11.29
  -7  10  -2  398.16   11.02
  -3  10   1   80.47    3.40
  -7  10  -1   84.94    3.58
  -3  10   1   84.91    3.44
  -7  10  -1   83.72    3.39
  -3  10   0  174.10    5.59
  -7  10   0  169.21    5.68
  -7  10   0  167.22    5.44
  -3  10   0  167.04    5.58
  -7  10   0  178.35    5.61
  -7  10   1  203.50    6.39
  -3  10  -1  204.27    6.26
  -7  10   1  195.08    6.24
  -3  10  -1  205.26    6.32
  -7  10   1  192.67    6.32
  -3  10  -2  146.29    4.83
  -7  10   2  145.63    4.97
  -3  10  -2  145.43    5.24
  -7  10   2  147.41    5.03
  -3  10  -2  146.63    4.94
  -7  10   2  144.57    5.01
  -3  10  -3  240.00    7.19
  -3  10  -3  257.39    7.74
  -3  10  -3  243.23    7.35
  -7  10   3  243.57    7.51
  -3  10  -4   46.66    2.80
  -3  10  -4   47.87    2.44
  -7  10   4   50.00    2.75
  -7  10   4   45.18    2.66
  -3  10  -5   54.96    2.96
  -3  10  -5   54.30    2.53
  -7  10   5   52.96    2.91
  -7  10   5   53.55    2.81
  -3  10  -6  216.05    7.28
  -7  10   6  231.04    7.29
  -7  10   6  228.40    7.14
  -3  10  -7  281.19    8.82
  -7  10   7  286.77    8.61
  -7  10   8    5.14    1.58
  -3  10  -8    4.84    1.79
  -3  10  -9  148.94    5.59
  -7  10   9  159.55    5.74
  -7  10   9  148.78    5.33
  -3  10 -10   80.31    3.95
  -7  10  10   91.67    4.18
  -7  10  10   86.53    3.64
  -7  10  11   13.76    1.76
  -7  10  11   15.13    2.31
  -3  10 -11   16.97    2.18
  -3  10 -12  105.01    4.40
  -7  10  12  109.65    4.59
  -7  10  12  100.59    3.90
  -3  10 -13  113.98    4.60
  -7  10  13  119.20    4.78
  -3  10 -14   63.21    3.10
  -7  10  14   67.51    3.37
  -3  10 -15   73.80    3.17
  -7  10  15   74.48    3.37
  10  -7 -16   28.78    2.33
  -7  10  16   28.40    2.00
  10  -7 -17   40.11    2.47
  10  -7 -18   14.08    1.55
  10  -7 -19   10.87    1.06
  10  -2 -19    1.09    0.86
  -8  10 -18   32.59    1.64
  10  -2 -18   35.69    2.11
  -8  10 -17   16.81    1.54
  10  -2 -17   14.57    1.93
  -8  10 -16    5.16    1.33
  10  -2 -16    4.02    1.86
  -8  10 -15  105.11    3.98
  -8  10 -14   30.46    2.20
  -2  10  14   28.56    2.13
  -8  -2  13  106.30    4.02
  -8  10 -13  111.19    4.28
  -2  10  13  107.75    4.32
  -8  10 -12  256.07    7.99
  -2  10  12  260.96    8.18
  -8  10 -12  265.99    8.97
  -8  10 -11   50.69    2.83
  -2  10  11   51.62    3.12
  -8  -2  10   82.22    3.43
  -8  10 -10   83.21    3.60
  -2  10  10   89.33    4.00
  -2  10  10   92.58    3.73
  -8  10  -9  472.97   13.00
  -8  -2   9  461.71   12.94
  -2  10   9  472.75   13.46
  -8  10  -9  467.71   13.85
  -2  10   9  472.34   13.17
  -8  10  -8   41.71    2.37
  -8  -2   8   39.29    2.41
  -2  10   8   40.95    2.81
  -2  10   8   47.15    2.66
  -8  -2   7   65.41    3.00
  -8  10  -7   62.35    2.87
  -2  10   7   61.04    3.29
  -2  10   7   67.88    3.24
  -8  10  -6  173.69    5.58
  -8  -2   6  181.63    5.81
  -2  10   6  176.65    6.13
  -2  10   6  179.20    6.04
  -8  -2   5   17.01    1.75
  -8  10  -5   16.81    1.47
  -2  10   5   18.12    1.92
  -8  10  -4    1.66    1.09
  -2  10   4    1.79    1.49
  -2  10   4    2.11    1.46
  -2  10   3   21.07    1.99
  -2  10   3   20.43    2.00
  -8  10  -3   24.15    1.79
  -8  10  -2   17.31    1.66
  -2  10   2   15.04    1.76
  -8  10  -1   19.38    1.77
  -2  10   1   22.08    1.86
  -8  10  -1   18.99    1.82
  -2  10   1   23.27    1.97
  -8  10   0  254.23    7.50
  -2  10   0  246.17    7.49
  -8  10   0  241.16    7.49
  -2  10   0  240.59    7.50
  -8  10   0  245.84    7.33
  -8  10   1    6.30    1.45
  -2  10  -1    7.93    1.44
  -8  10   1    7.65    1.40
  -2  10  -1    6.07    1.57
  -8  10   1    7.18    1.34
  -2  10  -1    7.20    1.48
  -8  10   2   61.44    3.02
  -2  10  -2   66.64    2.86
  -2  10  -2   61.08    3.11
  -8  10   2   60.15    2.81
  -2  10  -2   61.93    2.90
  -8  10   2   61.33    2.90
  -2  10  -3  574.04   15.60
  -2  10  -3  595.24   16.09
  -2  10  -3  579.54   15.77
  -8  10   3  595.80   15.90
  -2  10  -4   38.36    2.52
  -2  10  -4   34.92    2.15
  -8  10   4   33.82    2.40
  -8  10   5   38.71    2.49
  -2  10  -5   36.41    2.48
  -2  10  -5   36.15    2.16
  -8  10   5   36.25    2.54
  -8  10   6  648.06   17.65
  -2  10  -6  658.07   17.77
  -8  10   6  650.88   17.78
  -8  10   7   44.84    2.70
  -2  10  -7   44.06    2.85
  -8  10   7   41.55    2.75
  -2  10  -8   59.41    3.22
  -8  10   8   66.36    3.18
  -2  10  -9  210.71    7.07
  -8  10   9  212.20    7.32
  -8  10   9  223.33    7.01
  -8  10  10   20.47    2.04
  -8  10  10   23.35    2.40
  -2  10 -10   22.90    2.24
  -8  10  11   14.42    1.75
  -8  10  11   18.23    2.33
  -2  10 -11   18.50    1.99
  -2  10 -12   43.12    2.69
  -8  10  12   49.38    3.22
  -8  10  12   47.36    2.54
  -2  10 -13   42.87    2.54
  -8  10  13   48.89    3.05
  -8  10  14   81.21    3.73
  -8  10  15   61.08    3.03
  -8  10  16   17.53    1.68
  10  -8 -16   15.80    1.84
  10  -8 -17    6.08    1.41
  10  -8 -18   19.73    1.37
  -9  10 -18   24.51    1.33
  10  -1 -18   20.60    1.52
  -9  10 -17   11.94    1.32
  10  -1 -17   11.20    1.66
  -9  10 -16   23.23    1.73
  10  -1 -16   21.48    2.13
  -9  10 -15   99.08    3.81
  10  -1 -15  104.37    4.28
  -9  10 -14   31.03    2.19
  -1  10  14   29.72    1.96
  -9  -1  13  100.11    3.90
  -9  10 -13   96.35    3.94
  -1  10  13   99.92    3.96
  -1  10  12    8.24    1.69
  -9  10 -12   10.91    1.82
  -9  -1  12   11.73    1.80
  -9  10 -11   29.76    3.20
  -1  10  11   25.10    2.36
  -9  10 -11   27.26    2.23
  -9  -1  10  190.51    6.16
  -9  10 -10  194.53    6.35
  -1  10  10  194.32    6.59
  -9  10 -10  193.25    7.18
  -9  -1   9  387.61   11.23
  -1  10   9  405.25   11.66
  -9  10  -9  390.72   12.11
  -1  10   9  405.57   11.43
  -9  10  -9  392.60   11.33
  -9  10  -8    8.94    2.26
  -1  10   8    6.81    1.99
  -9  -1   8    6.04    1.65
  -9  10  -8    7.36    1.54
  -1  10   8    7.74    1.77
  -9  10  -7  137.59    4.77
  -9  -1   7  129.19    4.87
  -1  10   7  138.00    5.19
  -1  10   7  135.39    5.04
  -9  10  -6  181.40    5.86
  -9  -1   6  195.54    6.14
  -1  10   6  179.02    6.33
  -1  10   6  182.07    6.23
  -9  -1   5   48.38    2.67
  -1  10   5   47.52    2.79
  -9  -1   4   79.77    3.37
  -1  10   4   73.59    3.50
  -9  10  -4   72.99    3.12
  -9  10  -3   33.08    2.13
  -9  -1   3   33.40    2.27
  -1  10   3   35.70    2.39
  -1  10   3   33.30    2.40
  -9  10  -2   40.92    2.35
  -1  10   2   41.20    2.56
  -9  10  -1   38.23    2.32
  -9  -1   1   31.96    2.19
  -1  10   1   32.82    2.30
  -9  10  -1   33.61    2.22
  -1  10   1   31.39    2.36
  -9  10   0   67.49    3.21
  -1  10   0   69.89    3.18
  -9  10   0   68.32    3.05
  -1  10   0   65.70    3.22
  -9  10   0   71.22    2.98
  -9  10   1   53.97    2.87
  -1  10  -1   59.34    2.83
  -9  10   1   54.90    2.63
  -1  10  -1   51.83    2.82
  -9  10   1   59.52    2.76
  -9  10   2    5.92    1.67
  -1  10  -2    6.28    1.34
  -9  10   2    5.58    1.37
  -1  10  -2    5.54    1.50
  -9  10   3  243.60    7.89
  -1  10  -3  266.79    8.05
  -1  10  -3  255.85    7.82
  -9  10   3  257.70    7.88
  -9  -1  -4   99.80    3.77
  -1  10  -4  103.99    4.22
  -9  10   4  107.03    4.22
  -9  10   5  430.76   12.03
  -9  -1  -5  422.61   11.54
  -1  10  -5  408.08   11.99
  -9  10   5  413.17   12.01
  -9  10   6  305.59    9.40
  -9  -1  -6  309.81    8.86
  -1  10  -6  318.47    9.41
  -9  10   6  317.70    9.55
  -9  10   7   14.53    2.04
  -9  10   7   13.05    2.10
  -1  10  -7   14.24    1.87
  -9  10   8  108.55    4.42
  -1  10  -8  104.04    4.21
  -1  10  -9  169.03    5.98
  -9  10   9  188.60    6.17
  -9  10  10   -1.21    1.54
  -9  10  10   -0.21    1.98
  -1  10 -10    0.92    1.40
  -1  10 -11   32.78    2.24
  -9  10  11   39.10    2.94
  -9  10  11   36.57    2.41
  -9  10  12   26.49    2.75
  -9  10  12   25.47    1.97
  -9  10  13    4.92    2.00
  -9  10  14   64.43    3.34
  -9  10  15   16.78    1.92
  10  -9 -15   18.66    1.85
  10  -9 -16   51.80    2.51
  -9  10  16   60.91    2.69
  -9  10  17   -0.18    0.94
  10  -9 -17    2.20    1.01
  -9  -1 -19   13.94    1.10
 -10  10 -17    0.41    0.91
  10   0 -17   -0.25    1.10
 -10  10 -16   87.19    3.19
  10   0 -16   83.81    3.46
 -10  10 -15    4.31    1.39
  10   0 -15    3.65    1.63
 -10   0  14   26.06    1.91
 -10  10 -14   28.99    2.08
  10   0 -14   24.06    2.32
 -10   0  13  158.86    5.50
 -10  10 -13  166.79    5.52
   0  10  13  161.12    5.39
 -10  10 -13  168.91    6.33
 -10   0  12  108.59    4.33
 -10  10 -12  106.01    4.25
   0  10  12  109.58    4.23
 -10  10 -12  108.18    5.10
 -10  10 -11    7.01    2.56
 -10   0  11    6.50    1.40
 -10  10 -11    4.67    1.64
 -10   0  11    3.93    1.78
 -10   0  10  477.27   13.52
 -10  10 -10  493.68   13.69
   0  10  10  497.19   13.93
 -10  10 -10  508.67   14.62
 -10  10  -9    3.70    2.35
   0  10   9    3.63    1.81
 -10   0   9    3.26    1.58
 -10  10  -9    2.32    1.66
 -10   0   8   37.69    2.55
 -10  10  -8   38.18    2.38
   0  10   8   40.27    2.88
 -10  10  -8   38.37    3.09
 -10   0   7  283.30    8.79
 -10  10  -7  297.10    8.63
   0  10   7  287.90    9.01
   0  10   6   24.92    2.39
 -10   0   6   24.56    2.30
   0  10   6   24.53    2.26
   0  10   5   -1.30    1.67
 -10   0   5   -1.95    1.74
   0  10   5   -0.18    1.58
 -10  10  -4   58.35    2.77
 -10   0   4   61.75    3.12
   0  10   4   61.49    3.22
 -10  10  -3   81.22    3.42
 -10   0   3   78.45    3.61
   0  10   3   83.76    3.75
   0  10   3   86.65    3.80
 -10  10  -2   70.99    3.25
   0  10   2   75.73    3.53
 -10  10  -1   25.91    2.08
 -10   0   1   25.14    2.11
   0  10   1   29.98    2.23
 -10  10  -1   23.14    1.91
   0  10   1   25.34    2.27
 -10  10   0    0.93    1.50
   0  10   0    0.50    1.40
 -10  10   0   -0.29    1.09
 -10   0   0    0.08    1.46
   0  10   0    0.26    1.60
 -10  10   1   35.22    2.48
 -10   0  -1   33.21    2.22
 -10  10   1   32.35    2.16
 -10  10   2   81.03    3.65
 -10   0  -2   74.63    3.29
 -10  10   2   75.94    3.37
 -10  10   3  150.57    5.42
 -10   0  -3  146.61    5.02
 -10  10   3  146.29    5.23
 -10   0  -4   32.80    2.09
 -10  10   4   34.49    2.44
 -10  10   5 1635.74   41.84
 -10   0  -5 1634.73   41.31
 -10  10   5 1633.17   41.84
 -10  10   6   26.13    2.45
 -10   0  -6   23.12    1.72
 -10  10   6   25.94    2.48
   0  10  -6   23.95    2.14
 -10  10   7   34.91    2.66
 -10  10   7   31.08    2.76
   0  10  -7   36.03    2.37
 -10  10   8  343.02   10.01
   0  10  -8  316.40    9.65
 -10  10   8  340.32   10.17
 -10  10   9   94.11    4.07
 -10  10  10    2.96    1.78
 -10  10  10    1.64    2.17
 -10  10  11   51.33    3.25
 -10  10  11   54.44    2.90
 -10  10  12    0.96    1.27
 -10  10  12    0.39    1.94
 -10  10  13   24.44    2.41
 -10  10  14   15.00    2.04
  10 -10 -14   12.35    1.49
 -10  10  15    5.80    1.53
 -10  10  16    9.75    1.49
 -10  10  17   14.02    1.26
 -10   0 -18    9.33    1.22
  10   1 -16   21.38    1.41
  10   1 -15    9.24    1.43
 -11   1  14   60.78    2.74
 -11  10 -14   61.59    2.78
  10   1 -14   53.91    2.76
 -11   1  13   33.75    2.24
 -11  10 -13   28.65    2.08
  10   1 -13   26.35    2.09
 -11   1  12   73.17    3.56
 -11  10 -12   74.75    3.32
 -11  10 -12   76.74    4.05
 -11  10 -11   10.92    2.47
 -11   1  11    9.97    1.54
 -11  10 -11   11.34    1.83
 -11   1  11   10.45    2.09
 -11   1  10   67.29    3.53
 -11   1  10   64.13    3.09
 -11  10 -10   64.63    3.21
   1  10  10   62.67    3.30
 -11  10 -10   66.60    3.84
 -11  10  -9    0.80    2.11
   1  10   9    0.65    1.72
 -11   1   9    1.57    1.65
 -11  10  -9   -0.08    1.58
 -11   1   8   91.19    3.87
   1  10   8   89.45    4.05
 -11   1   7   67.04    3.35
   1  10   7   59.83    3.38
   1  10   6   17.14    2.25
 -11   1   6   13.14    2.11
   1  10   5   26.44    2.49
 -11   1   5   24.37    2.39
 -11  10  -4  125.75    4.53
 -11   1   4  126.62    4.87
 -11  10  -3   34.99    2.29
 -11  10  -2   17.32    1.93
   1  10   2   18.33    2.10
 -11   1   2   15.72    2.10
 -11  10  -1   64.59    3.22
 -11   1   1   67.65    3.32
 -11  10   0   45.11    2.73
 -11   1   0   43.57    2.72
 -11  10   0   40.68    2.29
 -11  10   1   16.25    2.10
 -11  10   1   20.05    1.83
 -11   1  -1   18.59    2.06
 -11  10   2   68.75    3.53
 -11   1  -2   70.43    3.29
 -11  10   2   75.44    3.36
 -11  10   3   23.62    2.45
 -11   1  -3   21.87    1.98
 -11  10   3   20.28    2.08
 -11   1  -4  184.79    6.01
 -11  10   4  187.07    6.37
 -11  10   5  193.98    6.76
 -11   1  -5  198.29    6.19
 -11  10   5  188.79    6.64
 -11  10   6  417.01   11.58
 -11  10   6  395.21   11.53
 -11  10   7   98.38    4.36
 -11  10   7   95.34    4.36
 -11  10   8  107.37    4.55
 -11  10   8  108.02    4.74
 -11  10   9   39.46    2.71
 -11  10  10   26.22    2.25
 -11  10  11   34.21    2.98
 -11  10  11   31.91    2.27
 -11  10  12   34.56    2.85
 -11  10  12   36.55    2.26
 -11  10  13    7.72    1.99
 -11  10  14   24.48    2.18
 -11  10  15    6.30    1.55
 -11   1 -16    8.07    1.47
 -11  10  16    4.81    1.33
 -11   1 -17   12.21    1.28
 -12   2  15    4.11    0.97
 -12   2  14   70.02    2.89
 -12   2  13   41.82    2.48
 -12   2  12    2.04    1.64
 -12   2  11  169.53    5.78
 -12   2  11  148.62    5.12
 -12   2  10   69.68    3.66
 -12   2  10   61.68    3.03
 -12   2   9   48.19    3.26
 -12   2   9   49.42    2.87
 -12   2   8  144.67    5.57
 -12   2   8  137.48    5.16
 -12   2   7   16.45    2.23
 -12   2   6    9.75    2.08
 -12   2   5   75.20    3.77
 -12  10  -4   27.68    1.98
 -12   2   4   24.61    2.53
 -12  10  -3   14.27    1.82
 -12  10  -2   58.09    3.09
 -12   2   2   63.70    3.43
 -12  10  -1    5.45    1.79
 -12   2   1    6.28    1.95
 -12  10   0    6.36    1.87
 -12   2   0    7.03    1.93
 -12  10   1  118.13    4.88
 -12   2  -1  123.49    4.71
 -12  10   1  118.52    4.43
 -12  10   2   40.11    2.83
 -12   2  -2   37.85    2.50
 -12  10   2   36.85    2.50
 -12  10   3   14.39    2.36
 -12   2  -3   16.90    1.85
 -12  10   3   15.29    1.97
 -12   2  -4  279.70    8.47
 -12  10   4  293.38    8.94
 -12   2  -5   92.38    3.66
 -12  10   5   98.67    4.29
 -12  10   6   93.00    4.42
 -12  10   6   96.34    4.37
 -12  10   7  342.81   10.37
 -12  10   7  337.46   10.45
 -12  10   8    4.46    1.93
 -12  10   8    3.25    2.01
 -12  10   9   51.57    3.11
 -12  10   9   51.44    3.40
 -12  10  10   75.35    3.50
 -12  10  11   10.35    1.71
 -12  10  11   14.04    2.35
 -12  10  12   19.45    1.75
 -12  10  12   22.92    2.28
 -12  10  13   53.07    2.97
 -12   2 -14    5.18    1.44
 -12  10  14    5.10    1.65
 -12   2 -15    4.34    1.30
 -12  10  15    3.72    1.29
 -12   2 -16    7.09    1.09
 -12  10  16    7.90    1.06
 -13   3  15    8.93    0.90
 -13   3  14   32.69    1.88
 -13   3  13    7.85    1.53
 -13   3  12   35.86    2.45
 -13   3  11   91.95    3.96
 -13   3  11   86.64    3.38
 -13   3  10   19.80    1.95
 -13   3  10   22.77    2.55
 -13   3   9   38.89    2.93
 -13   3   9   39.78    2.54
 -13   3   8   41.17    2.71
 -13   3   7   51.15    3.07
 -13   3   6   52.95    3.41
 -13   3   6   56.33    3.27
 -13   3   5   27.58    2.69
 -13  10  -4   15.29    1.72
 -13  10  -3   33.47    2.31
 -13  10  -2   83.07    3.70
 -13   3   2   77.99    3.86
 -13  10  -1   27.71    2.44
 -13   3   1   28.58    2.58
 -13  10   0   48.65    3.09
 -13   3   0   46.73    2.96
 -13  10   1   49.33    3.15
 -13  10   1   45.96    2.59
 -13   3  -2   28.44    2.32
 -13  10   2   30.63    2.29
 -13  10   3   64.81    3.67
 -13   3  -3   65.31    3.10
 -13  10   3   69.64    3.34
 -13  10   4   54.21    3.53
 -13   3  -4   64.39    2.92
 -13  10   4   55.50    3.25
 -13   3  -5    5.84    1.37
 -13  10   5    7.32    1.98
 -13  10   6   46.59    3.08
 -13  10   6   42.28    2.96
 -13  10   7   96.80    4.41
 -13  10   7   97.87    4.47
 -13  10   8   15.85    2.30
 -13  10   8   17.84    2.58
 -13  10   9   44.20    2.90
 -13  10   9   47.68    3.17
 -13  10  10   16.49    1.93
 -13  10  11   23.23    1.94
 -13  10  12   20.29    1.65
 -13   3 -12   19.38    1.67
 -13  10  12   22.21    2.19
 -13  10  13   23.23    2.17
 -13   3 -13   20.71    1.60
 -13  10  14   23.43    2.51
 -13   3 -14   18.16    1.42
 -13  10  15    2.77    1.04
 -14   4  14   12.45    1.11
 -14   4  13    5.12    1.24
 -14   4  12   92.90    3.61
 -14   4  11   11.19    1.40
 -14   4  11   10.12    1.89
 -14   4  10   23.44    1.89
 -14   4  10   23.22    2.31
 -14   4   9   89.21    3.66
 -14   4   8   45.10    2.76
 -14   4   7   42.20    2.96
 -14   4   7   43.39    2.79
 -14   4   6  110.34    4.72
 -14   4   6  115.26    4.66
 -14   4   5   32.09    2.73
 -14   4   5   26.31    2.60
 -14  10  -4    0.99    1.23
 -14   4   4    0.55    1.85
 -14  10  -3   35.40    2.33
 -14   4   3   40.12    2.65
 -14   4   3   40.90    3.04
 -14  10  -2   48.60    2.80
 -14   4   2   51.22    2.93
 -14   4   2   48.35    3.15
 -14   4   1   25.68    2.20
 -14  10  -1   28.20    2.41
 -14   4   1   29.25    2.59
 -14  10   0   55.11    3.23
 -14   4   0   56.10    2.91
 -14   4   0   61.43    3.19
 -14  10   1    3.65    1.94
 -14   4  -1    6.26    1.83
 -14  10   1    4.02    1.38
 -14   4  -1    3.99    1.33
 -14  10   2   12.19    2.34
 -14   4  -2   13.32    1.95
 -14  10   2   13.13    1.81
 -14  10   3  104.61    4.63
 -14   4  -3  100.57    4.04
 -14  10   3  110.54    4.27
 -14  10   4   37.31    3.09
 -14   4  -4   32.68    2.13
 -14  10   4   33.00    2.46
 -14   4  -5   17.49    1.63
 -14  10   5   16.32    2.15
 -14  10   6   64.40    3.55
 -14  10   6   59.75    3.36
 -14  10   7   36.93    2.80
 -14  10   7   30.70    2.64
 -14  10   8   19.67    2.30
 -14  10   8   17.09    2.27
 -14  10   9  148.20    5.28
 -14  10   9  150.76    5.46
 -14  10  10   16.74    1.88
 -14  10  10   16.51    2.23
 -14  10  11    3.16    1.33
 -14  10  12   53.59    2.75
 -14  10  12   45.62    2.20
 -14  10  13    7.43    1.45
 -14  10  14    4.47    1.10
 -15   5  13   11.21    1.09
 -15   5  12   18.09    1.51
 -15   5  11    4.75    1.02
 -15   5  11    4.04    1.62
 -15   5  10   11.22    2.43
 -15   5   9   43.17    2.38
 -15   5   8   19.33    1.93
 -15   5   8   17.94    2.16
 -15   5   7   35.65    2.67
 -15   5   7   34.33    2.50
 -15   5   6  106.18    4.39
 -15   5   6  102.27    4.27
 -15   5   5   26.18    2.59
 -15   5   5   24.96    2.39
 -15   5   4   51.07    2.94
 -15  10  -3   79.42    3.38
 -15   5   3   83.62    3.68
 -15   5   3   88.59    3.90
 -15  10  -2   59.05    2.88
 -15   5   2   52.18    2.89
 -15   5   2   57.75    3.17
 -15  10  -1   89.38    3.83
 -15   5   1   83.10    3.60
 -15   5   1   93.51    3.96
 -15  10   0   58.90    3.26
 -15   5   0   58.69    2.82
 -15   5   0   65.45    3.21
 -15  10   1   13.06    2.17
 -15   5  -1   11.89    1.88
 -15   5  -2   32.27    2.23
 -15  10   2   27.85    2.64
 -15  10   2   27.96    2.06
 -15  10   3   78.86    3.88
 -15   5  -3   73.21    3.16
 -15  10   3   77.46    3.35
 -15  10   4    4.18    2.10
 -15   5  -4    5.28    1.31
 -15  10   4    5.57    1.59
 -15  10   5    6.57    1.80
 -15  10   6   15.42    2.33
 -15  10   6   15.43    2.00
 -15  10   7   14.97    2.24
 -15  10   7   13.19    1.99
 -15  10   8   41.05    2.60
 -15  10   8   37.79    2.57
 -15  10   9   20.58    1.97
 -15  10   9   18.73    2.08
 -15  10  10   30.79    2.64
 -15  10  10   32.15    2.21
 -15  10  11   24.84    1.65
 -15  10  13   21.39    1.44
 -16   6  11   -0.85    0.98
 -16   6  10   18.92    1.33
 -16   6   9   12.69    1.44
 -16   6   9   10.15    1.59
 -16   6   8   13.75    1.57
 -16   6   8   13.26    1.73
 -16   6   7   49.82    2.67
 -16   6   7   52.42    2.72
 -16   6   6   16.56    1.87
 -16   6   6   12.90    1.84
 -16   6   5    1.12    1.53
 -16   6   4   74.46    3.30
 -16   6   4   79.16    3.57
 -16  10  -3    7.93    1.32
 -16   6   3   11.20    1.91
 -16   6   3    8.18    1.57
 -16  10  -2    8.71    1.52
 -16   6   2    8.81    1.83
 -16   6   2   10.16    1.54
 -16  10  -1   25.12    1.99
 -16   6   1   22.24    1.77
 -16   6   1   23.32    2.15
 -16  10   0    1.42    1.59
 -16   6   0    0.71    1.54
 -16  10   1    5.20    1.72
 -16   6  -1    7.87    1.52
 -16  10   2   53.34    2.91
 -16   6  -2   44.80    2.42
 -16  10   3   16.18    2.11
 -16   6  -3   17.73    1.58
 -16  10   3   17.75    1.65
 -16  10   4    0.94    1.71
 -16  10   4    3.90    1.36
 -16  10   5   23.37    1.90
 -16  10   6    3.60    1.74
 -16  10   6    3.36    1.45
 -16  10   7    0.47    1.62
 -16  10   7    3.78    1.52
 -16  10   8   44.82    2.45
 -16  10   8   44.33    2.41
 -16  10   9    2.98    1.29
 -16  10   9    3.18    1.32
 -16  10  10   12.22    1.23
 -16  10  10   13.26    1.41
 -16  10  11   44.11    2.00
 -17   7   9    6.68    0.88
 -17   7   9    6.71    0.94
 -17   7   8   12.87    1.26
 -17   7   8   13.88    1.28
 -17   7   7    6.63    1.26
 -17   7   7    8.99    1.25
 -17   7   6    3.07    1.37
 -17   7   6    1.74    1.16
 -17   7   5   17.55    1.51
 -17   7   4   14.71    1.72
 -17   7   4   13.84    1.40
 -17   7   3   33.24    2.15
 -17   7   3   27.02    1.71
 -17  10  -2    8.42    1.19
 -17   7   2    9.64    1.67
 -17  10  -1    2.08    1.17
 -17   7   1    2.63    1.65
 -17   7   0   22.58    1.81
 -17  10   0   19.21    1.71
 -17   7  -1   20.83    1.66
 -17  10   1   21.20    1.87
 -17  10   2   65.69    3.07
 -17   7  -2   55.37    2.43
 -17  10   3    1.38    1.51
 -17  10   4   17.76    1.78
 -17  10   4   15.76    1.41
 -17  10   5    0.06    1.61
 -17  10   5    1.60    1.07
 -17  10   6    3.00    1.12
 -17  10   7    3.77    1.24
 -17  10   7    3.75    1.10
 -17  10   8   10.85    1.21
 -17  10   8    9.13    1.13
 -17  10   9    9.70    0.97
 -17  10   9    9.32    1.04
 -18   8   6    1.48    0.85
 -18   8   4    0.38    1.01
 -18   8   3    2.82    1.05
 -18   8   2   13.93    1.31
 -18  10  -1    0.78    0.73
 -18   8   1    1.22    0.96
 -18  10   0    8.66    1.01
 -18   8   0    8.24    1.06
 -18  10   1   32.35    1.67
 -18   8  -1   31.93    1.51
 -18  10   2    4.89    1.07
 -18  10   3    1.59    1.01
 -18  10   4   11.31    1.23
 -18  10   5    5.74    1.01
  11  -5 -19    3.27    0.83
  11  -5 -18   10.02    1.42
  11  -5 -17   77.16    3.39
  -6  11 -17   79.39    3.07
  -5  11  16    4.30    1.13
  -6  11 -16    3.18    1.51
  -5  11  15   82.16    3.39
  -6  11 -15   84.16    3.78
  -5  11  14   40.38    2.56
  -5  11  13   11.71    2.06
  -5  11  12   51.75    3.27
  -5  11  11   46.30    3.21
  -5  11  11   45.79    2.55
  -5  11  10   67.87    3.70
  -5  11  10   62.57    3.12
  -6  -5   9  159.14    5.31
  -5  11   9  172.49    6.17
  -5  11   9  167.86    5.75
  -5  11   8  150.47    5.80
  -5  11   8  157.45    5.55
  -5  11   7   41.16    2.63
  -5  11   6   31.30    2.60
  -5  11   6   34.54    2.42
  -5  11   5   80.72    3.75
  -5  11   5   79.57    3.61
  -6  11  -4    0.50    1.15
  -5  11   4    1.43    1.54
  -5  11   4    0.36    1.59
  -6  11  -4   -0.59    1.71
  -5  11   3  140.09    5.03
  -6  11  -3  134.74    5.17
  -6  11  -3  133.09    4.71
  -5  11   2  356.29   10.42
  -6  11  -2  350.50   10.60
  -5  11   2  362.93   10.41
  -6  11  -2  363.50   10.27
  -5  11   1    7.64    1.64
  -6  11  -1    6.92    1.54
  -6  11  -1    7.66    1.40
  -5  11   1    6.20    1.51
  -5  11   1    8.96    1.75
  -6  11  -1    7.87    1.76
  -5  11   0  242.82    7.58
  -5  11   0  256.53    8.00
  -6  11   0  258.64    7.94
  -6  11   0  249.94    7.60
  -5  11   0  253.84    7.69
  -6  11   0  244.78    7.68
  -5  11  -1  246.92    7.50
  -6  11   1  263.75    7.92
  -5  11  -1  248.41    7.90
  -6  11   1  246.53    7.65
  -5  11  -1  239.01    7.57
  -6  11   1  251.52    7.70
  -5  11  -2  211.43    6.45
  -5  11  -2  211.03    6.99
  -6  11   2  204.14    6.70
  -5  11  -2  203.66    6.59
  -6  11   2  218.86    6.80
  -6  11   3   59.11    3.03
  -5  11  -3   55.68    2.76
  -6  11   4   60.63    3.18
  -5  11  -4   65.58    2.94
  -6  11   4   64.11    3.20
  -5  11  -5   52.39    3.14
  -6  11   5   49.27    2.94
  -5  11  -5   52.64    2.54
  -6  11   5   52.46    2.97
  -5  11  -6   43.47    2.99
  -6  11   6   44.01    2.90
  -6  11   6   42.12    2.71
  -5  11  -7  173.32    6.41
  -6  11   7  178.78    6.09
  -6  11   8  309.48    9.34
  -6  11   9  269.53    8.55
  -6  11   9  259.22    8.16
  -6  11  10   22.84    2.16
  -6  11  10   21.49    2.52
  -6  11  11   12.60    1.76
  -6  11  11    9.89    2.27
  -6  11  12   19.52    2.39
  -6  11  12   22.42    1.85
  -6  11  13   30.40    2.61
  -5  11 -13   28.95    2.52
  -6  11  14   42.11    2.70
  -5  11 -14   37.85    2.73
  -6  11  15   44.53    2.49
  -5  11 -15   40.07    2.57
  11  -6 -16   43.65    2.76
  -6  11  16   40.53    2.09
  -5  11 -16   42.49    2.33
  11  -6 -17   31.42    2.17
  11  -6 -18   11.16    1.42
  11  -4 -18   27.38    1.82
  -7  11 -18   29.01    1.55
  -7  11 -17   26.88    1.41
  11  -4 -17   32.20    2.26
  -7  11 -17   27.22    2.01
  -7  11 -16   12.73    1.25
  11  -4 -16   14.93    2.16
  -7  11 -15   34.54    1.93
  -4  11  15   36.12    2.13
  -7  11 -14   58.89    2.69
  -4  11  14   69.06    3.10
  -7  11 -13   63.02    2.82
  -4  11  13   67.39    3.40
  -4  11  12   10.63    2.00
  -7  11 -12   11.18    1.42
  -4  11  11  107.00    4.63
  -4  11  11  109.23    4.12
  -7  11 -11   99.78    3.83
  -7  11 -10   60.40    2.75
  -4  11  10   61.39    3.53
  -4  11  10   60.89    3.02
  -7  -4   9   52.55    2.58
  -4  11   9   52.81    3.24
  -4  11   9   50.41    2.92
  -7  -4   8   77.96    3.26
  -4  11   8   76.71    3.93
  -4  11   8   73.58    3.59
  -7  -4   7   43.29    2.48
  -4  11   7   45.77    2.78
  -4  11   6   99.67    4.12
  -4  11   5   32.68    2.58
  -4  11   5   34.25    2.44
  -4  11   4  158.28    5.65
  -7  11  -4  161.27    5.87
  -4  11   4  164.25    5.65
  -7  11  -4  158.20    5.27
  -4  11   3  566.88   15.28
  -7  11  -3  547.48   15.38
  -7  11  -3  540.68   14.93
  -4  11   2  111.18    4.25
  -7  11  -2   96.34    4.23
  -4  11   2  107.71    4.21
  -7  11  -2  104.71    4.02
  -4  11   1  103.73    3.98
  -7  11  -1   93.39    4.07
  -7  11  -1   91.29    3.62
  -4  11   1   98.95    3.98
  -7  11  -1  100.36    3.92
  -4  11   0  194.02    6.11
  -7  11   0  191.30    6.29
  -7  11   0  190.57    6.03
  -4  11   0  191.91    6.19
  -7  11   0  191.96    6.15
  -4  11  -1  237.81    7.34
  -7  11   1  255.55    7.67
  -7  11   1  230.98    7.39
  -4  11  -1  241.70    7.47
  -7  11   1  245.56    7.55
  -4  11  -2  217.24    6.68
  -7  11   2  224.97    7.01
  -7  11   2  219.45    6.91
  -4  11  -2  216.00    6.81
  -7  11   2  227.49    7.02
  -7  11   3   17.31    1.89
  -4  11  -3   19.48    2.19
  -4  11  -3   20.62    1.87
  -4  11  -4  149.69    5.39
  -7  11   4  135.52    5.09
  -4  11  -4  138.93    4.87
  -7  11   5   18.29    2.06
  -7  11   5   20.29    2.15
  -4  11  -5   23.88    2.28
  -4  11  -5   20.63    1.77
  -4  11  -6   47.52    3.05
  -7  11   6   46.64    2.97
  -7  11   6   43.60    2.82
  -4  11  -7  364.86   11.12
  -7  11   7  381.40   11.12
  -7  11   7  369.75   10.88
  -4  11  -8  397.94   11.75
  -7  11   8  387.70   11.40
  -4  11  -9   37.31    2.92
  -7  11   9   41.24    3.03
  -7  11   9   39.09    2.57
  -7  11  10    7.18    1.68
  -7  11  10   10.39    2.33
  -4  11 -10    5.15    1.96
  -4  11 -11   37.24    2.87
  -7  11  11   37.06    2.90
  -7  11  11   39.82    2.43
  -4  11 -12   54.94    3.22
  -7  11  12   54.97    3.32
  -7  11  12   54.35    2.68
  -4  11 -13   52.09    3.02
  -7  11  13   57.84    3.27
  -7  11  14   56.19    3.01
  -4  11 -14   50.85    2.91
  -7  11  15   16.67    1.82
  -4  11 -15   15.99    1.71
  11  -7 -16   30.80    2.35
  -7  11  16   31.99    1.96
  11  -7 -17   16.81    1.76
  11  -7 -18   10.88    1.27
  11  -3 -18   12.82    1.38
  -8  11 -18   13.29    1.23
  -8  11 -17    2.56    0.84
  11  -3 -17    3.11    1.43
  -8  11 -17    1.58    1.35
  -8  11 -16   12.73    1.26
  11  -3 -16   12.90    2.01
  -8  11 -15   38.74    2.07
  -3  11  15   42.10    2.15
  -8  11 -14   98.68    3.69
  -3  11  14  100.48    3.88
  -8  11 -13   52.88    2.69
  -3  11  13   61.92    3.07
  -8  11 -12  121.48    4.38
  -3  11  12  120.65    4.79
  -3  11  11    9.63    2.16
  -8  11 -11   11.30    1.61
  -3  11  11    8.50    1.56
  -8  -3  10   64.36    2.94
  -3  11  10   70.34    3.73
  -3  11  10   67.97    3.23
  -8  11 -10   69.80    3.10
  -3  11   9   30.09    2.80
  -8  11  -9   30.10    2.09
  -8  -3   9   33.26    2.19
  -3  11   9   28.59    2.26
  -3  11   8    5.98    2.10
  -8  -3   8    9.56    1.60
  -8  11  -8    7.88    1.32
  -3  11   8    7.44    1.77
  -8  11  -7   47.72    2.39
  -8  -3   7   53.25    2.76
  -3  11   7   55.77    3.33
  -3  11   7   52.54    2.99
  -8  -3   6   41.88    2.53
  -3  11   6   41.86    2.70
  -3  11   5    3.62    1.83
  -3  11   5    7.08    1.80
  -3  11   4   57.89    3.23
  -3  11   4   63.47    3.22
  -8  11  -4   60.87    2.81
  -3  11   3  190.24    6.35
  -8  11  -3  182.40    6.41
  -8  11  -3  187.83    6.04
  -8  11  -2   17.50    1.84
  -3  11   2   13.09    1.88
  -8  11  -2   16.29    2.01
  -3  11   2   15.66    2.08
  -3  11   1  115.51    4.41
  -8  11  -1  110.53    4.46
  -3  11   1  113.93    4.46
  -8  11  -1  118.05    4.37
  -3  11   0  165.52    5.61
  -8  11   0  164.96    5.74
  -8  11   0  164.06    5.47
  -3  11   0  168.27    5.70
  -8  11   0  166.66    5.66
  -8  11   1   21.19    2.03
  -3  11  -1   18.87    1.80
  -8  11   1   21.00    1.88
  -3  11  -1   19.61    2.16
  -8  11   1   20.83    1.98
  -3  11  -1   18.39    1.89
  -3  11  -2  171.82    5.67
  -8  11   2  168.54    5.78
  -3  11  -2  179.43    6.16
  -8  11   2  173.49    5.84
  -3  11  -2  177.23    5.84
  -8  11   2  171.28    5.91
  -3  11  -3  202.03    6.30
  -3  11  -3  204.18    6.86
  -3  11  -3  198.74    6.47
  -8  11   3  199.86    6.61
  -8  11   3  205.70    6.67
  -8  11   4   17.80    2.03
  -3  11  -4   16.13    2.06
  -3  11  -4   17.77    1.77
  -3  11  -5   94.41    4.22
  -3  11  -5  100.29    3.87
  -8  11   5   95.84    4.18
  -8  11   5   99.81    4.15
  -3  11  -6  128.05    5.11
  -8  11   6  136.55    5.21
  -8  11   6  131.75    5.01
  -3  11  -7  414.50   12.46
  -8  11   7  424.21   12.53
  -8  11   7  447.61   12.40
  -3  11  -8  221.93    7.25
  -8  11   8  204.91    6.93
  -8  11   9   17.31    2.13
  -3  11  -9   15.63    2.13
  -8  11  10   21.69    2.11
  -8  11  10   20.06    2.60
  -3  11 -10   20.93    2.27
  -8  11  11    8.43    1.69
  -8  11  11   11.57    2.35
  -3  11 -11    7.08    1.79
  -8  11  12    1.46    1.24
  -8  11  12    2.86    2.09
  -3  11 -12    2.40    1.64
  -3  11 -13   77.64    3.43
  -8  11  13   75.31    3.79
  -8  11  14   12.02    1.99
  -3  11 -14   10.45    1.53
  -8  11  15   25.05    2.09
  -8  11  16    7.58    1.35
  11  -8 -16    6.46    1.62
  11  -8 -17   12.53    1.49
  11  -8 -18   10.17    0.98
  11  -2 -18    5.72    0.98
  -9  11 -18    7.72    1.03
  11  -2 -17    7.88    1.39
  -9  11 -16   17.08    1.38
  11  -2 -16   19.81    2.00
  -9  11 -15   65.35    2.69
  11  -2 -15   65.70    3.30
  -9  11 -14   50.89    2.45
  -2  11  14   47.32    2.48
  -9  11 -13    8.04    1.45
  -9  -2  13    9.64    1.48
  -9  -2  12   53.01    2.76
  -9  11 -12   56.88    2.76
  -2  11  12   53.68    3.04
  -2  11  11   19.64    2.31
  -9  11 -11   23.62    1.96
  -9  -2  10   54.70    2.75
  -9  11 -10   53.70    2.81
  -2  11  10   52.50    3.18
  -2  11  10   59.87    2.97
  -9  -2   9   43.76    2.48
  -9  11  -9   38.34    2.31
  -2  11   9   42.60    3.02
  -2  11   9   40.04    2.58
  -2  11   8   15.22    2.27
  -9  -2   8   14.84    1.87
  -9  11  -8   16.25    1.67
  -2  11   8   13.20    1.97
  -9  11  -7   28.15    1.94
  -9  -2   7   29.39    2.29
  -2  11   7   28.78    2.60
  -2  11   7   31.45    2.50
  -9  -2   6   65.55    3.19
  -2  11   6   68.82    3.45
  -9  -2   5   18.45    2.00
  -2  11   5   15.67    2.08
  -9  -2   4   94.25    3.90
  -2  11   4   95.40    4.13
  -2  11   4   95.36    4.04
  -9  11  -4   89.48    3.65
  -9  -2   3   81.50    3.50
  -2  11   3   78.90    3.68
  -9  11  -3   75.72    3.70
  -2  11   3   73.13    3.64
  -9  11  -3   74.46    3.31
  -2  11   2   27.38    2.24
  -9  11  -2   25.28    2.25
  -9  11  -2   25.22    2.05
  -2  11   1   67.82    3.28
  -9  11  -1   71.01    3.30
  -2  11   1   64.03    3.33
  -9  11  -1   70.25    3.22
  -9  11   0  190.54    6.32
  -2  11   0  188.39    6.24
  -9  11   0  186.58    6.24
  -9  11   0  192.28    6.10
  -2  11   0  187.22    6.31
  -9  11   1   39.25    2.65
  -2  11  -1   46.16    2.55
  -9  11   1   41.73    2.43
  -2  11  -1   41.54    2.62
  -9  11   1   47.20    2.57
  -9  11   2   22.60    2.25
  -9  11   2   23.81    2.00
  -2  11  -2   23.79    1.95
  -9  11   2   22.13    1.83
  -2  11  -2   22.53    2.04
  -9  11   3  120.81    4.74
  -2  11  -3  116.84    4.74
  -2  11  -3  125.36    4.58
  -9  11   3  116.23    4.60
  -2  11  -4   59.94    3.31
  -9  11   4   57.55    3.15
  -9  11   5   12.48    2.11
  -9  11   5   10.69    2.04
  -2  11  -5   13.27    1.96
  -9  -2  -6  268.27    7.97
  -2  11  -6  272.16    8.60
  -9  11   6  277.73    8.72
  -9  11   6  280.17    8.61
  -2  11  -7  365.39   11.10
  -9  11   7  375.42   11.35
  -9  11   7  390.50   11.14
  -2  11  -8   40.95    2.73
  -9  11   8   39.27    3.13
  -9  11   8   43.43    2.84
  -2  11  -9   57.98    3.21
  -9  11   9   63.64    3.29
  -9  11  10   12.80    1.95
  -9  11  10   15.26    2.38
  -2  11 -10   16.48    2.27
  -9  11  11    4.13    1.54
  -9  11  11    5.78    2.08
  -2  11 -11    7.68    1.66
  -9  11  12   28.47    2.63
  -2  11 -12   25.95    2.01
  -9  11  12   26.63    2.01
  -9  11  13   37.63    2.77
  -9  11  14   29.52    2.36
  11  -9 -15   33.84    2.22
  -9  11  15   38.21    2.35
  -9  11  16    7.49    1.34
  11  -9 -16    7.34    1.47
  11  -9 -17    4.70    1.00
  11  -1 -17   11.48    1.17
  11  -1 -16   32.02    2.04
 -10  11 -15   10.37    1.25
  11  -1 -15   10.79    1.71
 -10  -1  14   55.28    2.45
 -10  11 -14   55.98    2.53
  11  -1 -14   55.21    2.95
 -10  -1  13   28.30    2.03
 -10  11 -13   26.07    1.95
  -1  11  13   26.21    2.00
 -10  -1  12   70.84    3.29
 -10  11 -12   68.16    3.14
  -1  11  12   74.97    3.40
  -1  11  11   15.78    2.16
 -10  11 -11   16.19    1.80
 -10  -1  11   17.35    2.06
 -10  -1  10   52.74    2.77
 -10  11 -10   53.99    2.74
  -1  11  10   50.81    3.14
  -1  11   9    0.19    1.94
 -10  -1   9    2.01    1.65
 -10  11  -9   -0.45    1.34
 -10  -1   8   87.59    3.85
  -1  11   8   94.03    4.30
  -1  11   8   95.33    4.05
 -10  -1   7   54.71    3.11
  -1  11   7   62.16    3.51
  -1  11   7   62.36    3.27
  -1  11   6   16.67    2.36
 -10  -1   6   13.33    1.98
  -1  11   6   17.45    2.20
 -10  -1   5   25.37    2.37
  -1  11   5   26.44    2.51
 -10  -1   4  149.23    5.20
  -1  11   4  137.39    5.32
  -1  11   4  136.21    5.25
 -10  11  -4  134.36    4.81
 -10  -1   3   38.21    2.55
  -1  11   3   34.51    2.64
 -10  11  -3   32.44    2.51
  -1  11   3   38.54    2.71
 -10  11  -3   35.31    2.27
 -10  11  -2   21.97    2.00
  -1  11   2   24.59    2.18
 -10  11  -2   20.99    2.09
 -10  11  -1   67.16    3.22
 -10  -1   1   63.42    3.18
  -1  11   1   62.79    3.25
 -10  11  -1   59.23    3.04
  -1  11   1   67.99    3.45
 -10  11   0   39.25    2.61
 -10  -1   0   38.07    2.48
  -1  11   0   40.36    2.55
 -10  11   0   39.16    2.36
  -1  11   0   39.24    2.64
 -10  11   0   35.12    2.21
 -10  11   1   25.38    2.28
  -1  11  -1   23.90    2.08
 -10  11   1   20.84    1.91
 -10  -1  -1   27.57    2.10
  -1  11  -1   24.43    2.18
 -10  11   2   65.31    3.39
 -10  -1  -2   60.14    2.99
 -10  11   2   60.94    3.11
 -10  11   3   28.85    2.42
 -10  -1  -3   28.01    2.12
 -10  11   3   23.08    2.15
 -10  -1  -4  176.62    5.89
 -10  11   4  193.01    6.42
 -10  11   5  180.80    6.42
 -10  -1  -5  177.77    5.84
  -1  11  -5  190.22    6.34
 -10  11   5  184.26    6.44
 -10  11   6  409.17   11.61
 -10  -1  -6  375.06   10.91
  -1  11  -6  402.25   11.51
 -10  11   6  401.81   11.71
 -10  11   7  108.25    4.53
  -1  11  -7  112.05    4.41
 -10  11   7  101.66    4.67
  -1  11  -8   89.15    3.92
 -10  11   8   91.12    4.34
 -10  11   8   97.01    4.14
  -1  11  -9   37.74    2.44
 -10  11   9   40.92    2.71
  -1  11 -10   27.33    2.06
 -10  11  10   27.09    2.33
 -10  11  11   24.02    2.10
 -10  11  11   29.02    2.70
 -10  11  12   34.29    2.80
 -10  11  12   33.33    2.13
 -10  11  13    8.68    2.02
 -10  11  14   22.59    2.15
 -10  11  15    4.83    1.51
  11 -10 -15    5.42    1.14
 -10  11  16    3.42    1.40
  11   0 -16   15.43    1.20
  11   0 -15   14.70    1.46
 -11   0  14   18.26    1.53
  11   0 -14   18.45    1.77
 -11   0  13   15.83    1.76
  11   0 -13   14.92    1.77
 -11   0  12   17.78    2.07
 -11   0  11  414.86   11.61
   0  11  11  420.32   11.55
   0  11  10    2.92    1.91
 -11   0  10    0.88    1.37
 -11   0  10    1.65    1.82
   0  11   9   29.84    2.66
 -11   0   9   32.16    2.29
   0  11   8   10.09    2.12
 -11   0   8    5.04    1.76
 -11   0   7   59.58    3.21
   0  11   7   62.94    3.52
   0  11   6   31.93    2.71
 -11   0   6   27.31    2.48
 -11   0   5   63.83    3.36
 -11   0   4  100.40    4.25
 -11  11  -4   94.29    3.81
 -11  11  -3    1.39    1.42
   0  11   3    4.00    2.00
 -11  11  -3    1.91    1.49
 -11  11  -2    2.50    1.49
   0  11   2    3.18    1.78
 -11  11  -2   -0.09    1.30
 -11  11  -1   73.67    3.52
 -11   0   1   73.72    3.55
 -11  11   0   -1.20    1.72
 -11   0   0    1.87    1.74
 -11  11   1   57.97    3.27
 -11   0  -1   50.62    2.92
 -11  11   1   57.65    2.89
 -11  11   2   62.05    3.48
 -11   0  -2   64.13    3.22
 -11  11   2   68.08    3.24
 -11  11   3   98.55    4.34
 -11   0  -3   96.46    3.95
 -11  11   3  100.82    4.17
 -11   0  -4   34.16    2.33
 -11  11   4   37.33    2.67
 -11  11   5   15.17    2.15
 -11   0  -5   15.07    1.68
 -11  11   6    2.35    1.91
 -11  11   6    5.02    2.09
 -11   0  -6    3.73    1.29
 -11  11   7  128.05    5.17
 -11  11   7  134.37    5.34
 -11  11   8   83.84    3.84
 -11  11   8   74.58    4.03
 -11  11   9   30.85    2.91
 -11  11   9   32.77    2.42
 -11  11  10   81.14    3.66
 -11  11  11   38.50    2.91
 -11  11  11   35.03    2.33
 -11  11  12   32.85    2.71
 -11  11  12   28.40    1.99
 -11  11  13   -0.08    1.71
 -11  11  14   20.62    2.01
 -11  11  15    3.65    1.37
 -11   0 -16   20.53    1.57
 -11  11  16   19.72    1.41
 -12   1  14   60.87    2.50
 -12   1  13    9.49    1.51
 -12   1  12   13.00    1.81
 -12   1  11   15.82    1.58
 -12   1  11   16.21    2.15
 -12   1  10   92.54    4.11
 -12   1  10   83.75    3.51
 -12   1   9   34.20    2.79
 -12   1   9   31.86    2.32
 -12   1   8  105.47    4.29
 -12   1   7    1.41    1.76
 -12   1   6   59.96    3.28
 -12   1   5   71.35    3.58
 -12  11  -4   13.77    1.65
 -12   1   4   20.47    2.45
 -12  11  -4   17.20    1.88
 -12  11  -3   28.20    2.17
 -12  11  -2   14.68    1.86
 -12   1   2   16.73    2.25
 -12  11  -1   33.26    2.56
 -12   1   1   29.67    2.60
 -12  11   0   16.75    2.17
 -12   1   0   22.22    2.27
 -12  11   1   27.83    2.59
 -12   1  -1   23.25    2.23
 -12  11   1   27.70    2.12
 -12  11   2   19.04    2.42
 -12  11   2   20.35    2.02
 -12   1  -2   24.10    2.15
 -12  11   3   83.62    4.04
 -12   1  -3   74.17    3.49
 -12  11   3   80.89    3.64
 -12   1  -4   73.15    3.28
 -12  11   4   72.36    3.51
 -12   1  -5  306.14    8.95
 -12  11   5  308.44    9.44
 -12  11   6  110.53    4.84
 -12  11   6  107.19    4.64
 -12  11   7  133.93    5.30
 -12  11   7  135.84    5.33
 -12  11   8   38.76    2.85
 -12  11   8   40.40    3.07
 -12  11   9   85.09    3.93
 -12  11   9   94.66    4.26
 -12  11  10   45.62    2.72
 -12  11  11   10.79    1.62
 -12  11  12   20.10    1.70
 -12  11  12   20.01    2.28
 -12  11  13   30.56    2.34
 -12   1 -14   13.45    1.48
 -12  11  14   16.33    1.79
 -12   1 -15   15.34    1.33
 -12  11  15   16.55    1.48
 -13  11 -15   15.99    1.30
 -13   2  14   22.47    1.44
 -13   2  13    3.97    1.31
 -13   2  12    1.14    1.50
 -13   2  11   16.13    1.51
 -13   2  11   19.46    2.08
 -13   2  10   39.60    2.80
 -13   2  10   34.02    2.17
 -13   2   9   11.26    1.82
 -13   2   9   14.52    2.12
 -13   2   8   51.96    2.97
 -13   2   7   49.26    2.95
 -13   2   6   40.43    2.82
 -13   2   5   32.23    2.72
 -13  11  -4   15.34    1.69
 -13  11  -3   39.41    2.50
 -13  11  -2   51.27    2.93
 -13   2   2   56.92    3.31
 -13  11  -1    4.76    1.85
 -13   2   1    3.45    1.97
 -13  11   0   16.44    2.13
 -13   2   0   13.80    2.16
 -13  11   1   23.70    2.59
 -13   2  -1   21.30    2.26
 -13  11   1   23.41    1.90
 -13  11   2   46.53    3.23
 -13   2  -2   46.23    2.77
 -13  11   2   53.30    2.76
 -13  11   3   12.60    2.36
 -13   2  -3   14.21    1.87
 -13  11   3   15.11    1.99
 -13  11   4  137.39    5.56
 -13   2  -4  141.26    4.93
 -13  11   4  144.54    5.31
 -13   2  -5  182.22    5.87
 -13  11   5  188.01    6.45
 -13  11   6   20.29    2.58
 -13  11   6   18.98    2.33
 -13  11   7  103.55    4.42
 -13  11   7   95.91    4.39
 -13  11   8   20.51    2.30
 -13  11   8   20.69    2.41
 -13  11   9   11.55    1.86
 -13  11   9   13.48    2.20
 -13  11  10   20.24    1.99
 -13  11  10   16.97    2.33
 -13  11  11   18.91    1.79
 -13  11  12    0.53    1.13
 -13  11  12    0.89    1.69
 -13  11  13   34.47    2.22
 -13  11  14    9.32    1.43
 -13  11  15    8.92    1.06
 -14   3  13   13.75    1.28
 -14  11 -13    9.10    1.12
 -14   3  12   26.68    1.94
 -14   3  11   13.34    1.34
 -14   3  11   13.37    1.80
 -14   3  10   45.93    2.79
 -14   3  10   48.05    2.38
 -14   3   9   38.31    2.77
 -14   3   9   36.48    2.32
 -14   3   8   41.53    2.60
 -14   3   7   72.03    3.64
 -14   3   7   62.65    3.29
 -14   3   6   80.83    3.97
 -14   3   6   87.67    3.86
 -14   3   5    4.86    1.94
 -14   3   5    8.79    2.05
 -14   3   4   43.73    2.88
 -14  11  -3   22.87    1.99
 -14   3   3   24.22    2.77
 -14   3   3   25.64    2.45
 -14  11  -2   68.00    3.25
 -14   3   2   70.01    3.58
 -14  11  -1    0.61    1.58
 -14   3   1    2.62    1.99
 -14  11   0   41.53    2.89
 -14   3   0   43.65    2.89
 -14  11   1    1.70    1.92
 -14   3  -1    6.11    1.75
 -14  11   2   11.62    2.23
 -14   3  -2   12.87    1.82
 -14  11   2   11.53    1.64
 -14  11   3   53.39    3.30
 -14   3  -3   51.99    2.75
 -14  11   3   58.17    2.92
 -14  11   4  231.98    7.44
 -14   3  -4  206.35    6.63
 -14  11   4  219.29    7.03
 -14   3  -5   54.42    2.55
 -14  11   5   60.58    3.13
 -14  11   6   39.76    3.03
 -14  11   6   42.41    2.82
 -14  11   7   11.15    2.21
 -14  11   7   14.84    2.20
 -14  11   8   59.32    3.21
 -14  11   8   64.21    3.35
 -14  11   9   53.21    2.84
 -14  11   9   57.43    3.17
 -14  11  10    4.07    1.47
 -14  11  10    2.15    1.65
 -14  11  11   20.56    1.69
 -14  11  12   21.83    1.42
 -14  11  13   14.06    1.53
 -14  11  14   -0.32    0.88
 -15   4  12    8.54    1.18
 -15   4  11    7.20    1.14
 -15   4  11    5.97    1.42
 -15   4  10   14.03    1.42
 -15   4  10   14.35    1.74
 -15   4   9   15.79    1.65
 -15   4   8   22.64    1.98
 -15   4   8   23.34    2.26
 -15   4   7   66.50    3.28
 -15   4   7   57.79    2.97
 -15   4   6   77.97    3.58
 -15   4   6   78.29    3.54
 -15   4   5   24.16    2.38
 -15   4   5   25.14    2.34
 -15   4   4   38.02    2.59
 -15  11  -3   73.62    3.16
 -15   4   3   78.66    3.54
 -15   4   3   81.04    3.69
 -15  11  -2   30.78    2.16
 -15   4   2   30.15    2.28
 -15   4   2   29.99    2.53
 -15  11  -1   70.23    3.28
 -15   4   1   64.78    3.13
 -15  11   0   36.16    2.53
 -15   4   0   35.61    2.17
 -15   4   0   35.58    2.43
 -15  11   1    4.85    1.88
 -15   4  -1    3.12    1.59
 -15  11   2   10.41    2.06
 -15   4  -2    8.63    1.64
 -15  11   2    7.87    1.42
 -15  11   3   93.26    4.11
 -15   4  -3   87.36    3.53
 -15  11   3   90.74    3.63
 -15  11   4   90.21    3.92
 -15  11   4   83.09    3.50
 -15  11   5   14.19    1.95
 -15  11   6   23.35    2.46
 -15  11   6   24.84    2.13
 -15  11   7   17.38    2.06
 -15  11   7   14.64    1.97
 -15  11   8    2.47    1.67
 -15  11   8    3.58    1.58
 -15  11   9   28.73    2.14
 -15  11   9   25.67    2.21
 -15  11  10   17.80    1.64
 -15  11  10   21.63    1.98
 -15  11  11    4.63    1.05
 -15  11  11    5.08    1.38
 -15  11  13    9.92    1.03
 -16   5  11    3.28    0.95
 -16   5  10    9.88    1.00
 -16   5   9    3.00    1.07
 -16   5   9    3.92    1.24
 -16   5   8   43.40    2.34
 -16   5   8   43.86    2.24
 -16   5   7   46.45    2.49
 -16   5   7   44.98    2.38
 -16   5   6    4.59    1.81
 -16   5   6   -0.26    1.49
 -16   5   5   36.24    2.32
 -16   5   4   32.32    2.17
 -16   5   3    8.54    1.80
 -16   5   3    9.46    1.60
 -16  11  -2   21.65    1.77
 -16   5   2   23.91    1.87
 -16   5   2   22.40    2.12
 -16  11  -1    6.33    1.48
 -16   5   1    7.60    1.74
 -16   5   1    6.96    1.31
 -16  11   0    2.63    1.59
 -16   5   0    1.64    1.54
 -16  11   1    6.74    1.76
 -16   5  -1    6.95    1.55
 -16  11   2   17.77    2.03
 -16   5  -2   20.46    1.75
 -16  11   3   40.71    2.65
 -16   5  -3   40.36    2.12
 -16  11   3   42.00    2.16
 -16  11   4   51.55    2.90
 -16  11   4   44.60    2.34
 -16  11   5    5.51    1.37
 -16  11   6   10.14    1.53
 -16  11   7   24.45    2.02
 -16  11   7   24.37    1.88
 -16  11   8   14.82    1.71
 -16  11   8   12.84    1.65
 -16  11   9    4.82    1.22
 -16  11   9    5.51    1.30
 -16  11  10    8.02    1.07
 -16  11  10    7.17    1.22
 -16  11  11   16.27    1.26
 -17   6   9    5.61    0.93
 -17   6   8   15.12    1.18
 -17   6   8   17.65    1.30
 -17   6   7    5.64    1.15
 -17   6   7    4.23    1.06
 -17   6   6   15.13    1.50
 -17   6   6   14.27    1.38
 -17   6   5   15.57    1.44
 -17   6   4   22.91    1.61
 -17   6   4   27.03    1.95
 -17   6   3   11.38    1.60
 -17   6   3    8.84    1.22
 -17  11  -2    0.56    0.93
 -17   6   2   -0.58    1.38
 -17   6   2    1.56    0.96
 -17  11  -1    7.27    1.49
 -17   6   1    8.93    1.46
 -17  11   0    6.28    1.46
 -17   6   0    8.58    1.47
 -17  11   1    4.73    1.42
 -17   6  -1    2.08    1.23
 -17   6  -2   22.11    1.53
 -17  11   2   21.78    1.85
 -17  11   3   21.49    1.91
 -17  11   4    1.98    1.45
 -17  11   5    3.29    1.46
 -17  11   5    4.19    1.02
 -17  11   6    4.15    1.00
 -17  11   7    7.22    1.21
 -17  11   7    8.47    1.06
 -17  11   8    7.64    1.09
 -17  11   8    8.61    0.99
 -18   7   6    5.49    0.83
 -18   7   4    0.16    0.92
 -18   7   3    2.91    1.00
 -18   7   2    6.24    1.07
 -18   7   1    2.35    0.95
 -18  11   0    7.75    0.91
 -18   7   0    6.34    0.96
 -18  11   1    6.16    0.98
 -18   7  -1    5.96    0.85
 -18  11   2    4.46    0.96
 -18  11   3   15.34    1.27
 -18  11   4    4.92    1.03
 -18  11   5    6.12    0.92
  -6  12   0  207.22    6.64
  -6  12   0  205.22    6.99
  -6  12   0  206.86    6.78
  -6  12  -1  110.76    4.16
  -6  12  -1  110.87    4.69
  -6  12   1  111.37    4.36
  -6  12  -1  109.57    4.36
  -6  12   1  109.82    4.46
  -6  12  -2   32.24    2.71
  -6  12   2   31.53    2.40
  -6  12  -2   32.67    2.30
  -6  12   2   34.26    2.54
  -6  12  -3  283.63    8.98
  -6  12   3  284.97    8.73
  -6  12  -3  277.82    8.46
  -6  12   4   28.70    2.46
  -6  12  -4   28.98    2.11
  -6  12   5   58.91    3.36
  -6  12  -5   58.50    2.77
  -6  12   5   57.25    3.23
  -6  12   6  137.72    5.38
  -6  12   6  143.27    5.25
  -6  12   7    9.98    1.97
  -6  12   7    4.39    2.15
  -6  12  -7    9.92    2.16
  -6  12  -8   54.02    3.47
  -6  12   8   53.32    3.12
  -6  -6   9  168.86    5.43
  -6  12   9  171.47    6.26
  -6  12  -9  166.02    6.30
  -6  12   9  165.37    5.91
  -6  12  10   57.74    3.52
  -6  12 -10   58.59    3.62
  -6  12  10   60.57    3.06
  -6  12  11   45.89    3.05
  -6  12 -11   46.29    3.17
  -6  12  11   45.96    2.62
  -6  12  12   70.29    3.62
  -6  12 -12   72.74    3.77
  -6  12  12   67.20    3.00
  -6  12  13   10.54    1.98
  -6  12 -13    9.84    2.16
  -6  12  14    2.29    1.56
  -6  12 -14    0.91    1.66
  -6  12  15   89.02    3.37
  -6  12 -15   84.94    3.54
  12  -6 -16   24.69    2.02
  -6  12  16   24.39    1.49
  -6  12 -16   26.56    1.76
  12  -6 -17    1.84    1.19
  12  -6 -18    8.40    0.99
  -7  12 -17    2.08    0.93
  -7  12 -16   57.64    2.70
  -5  12  15   47.61    2.31
  -7  12 -15   47.10    2.70
  -5  12  14   16.60    1.81
  -7  12 -14   21.04    2.35
  -5  12  13   48.90    2.84
  -7  12 -13   46.78    3.22
  -5  12  12   41.96    2.91
  -7  12 -12   43.43    3.23
  -5  12  11  110.81    4.67
  -5  12  11  106.52    4.16
  -5  12  10  110.96    4.88
  -5  12  10  116.94    4.48
  -7  -5   9  259.67    7.81
  -5  12   9  266.41    8.63
  -5  12   9  269.31    8.27
  -7  -5   8   27.83    2.02
  -5  12   8   26.24    2.40
  -5  12   7  133.16    5.05
  -5  12   6  127.20    5.24
  -5  12   6  136.95    5.15
  -5  12   5   24.03    2.64
  -7  12  -5   27.70    2.66
  -5  12   5   32.00    2.58
  -5  12   4  259.09    8.14
  -7  12  -4  259.20    8.28
  -7  12  -4  246.42    7.68
  -5  12   4  249.28    8.03
  -5  12   3  149.49    5.44
  -7  12  -3  148.34    5.56
  -7  12  -3  139.68    5.06
  -5  12   2   82.02    3.76
  -7  12  -2   82.58    3.98
  -5  12   2   84.41    3.86
  -7  12  -2   83.96    3.60
  -5  12   1  464.51   12.81
  -7  12  -1  438.17   12.49
  -7  12  -1  446.04   13.04
  -5  12   1  446.40   12.81
  -7  12  -1  460.90   12.76
  -5  12   0   71.39    3.31
  -5  12   0   79.71    3.76
  -7  12   0   70.40    3.58
  -7  12   0   76.65    3.38
  -5  12   0   75.61    3.55
  -7  12   0   81.20    3.61
  -5  12  -1   47.90    2.58
  -7  12   1   44.59    2.88
  -5  12  -1   48.72    3.13
  -7  12   1   49.64    2.74
  -5  12  -1   52.76    2.86
  -7  12   1   47.04    2.89
  -5  12  -2  108.67    4.05
  -7  12   2  108.80    4.38
  -5  12  -2  115.60    4.33
  -7  12   2  101.89    4.38
  -7  12   3  163.94    5.80
  -5  12  -3  172.81    5.68
  -7  12   4   31.83    2.58
  -5  12  -4   32.16    2.84
  -5  12  -4   36.24    2.34
  -5  12  -5  135.79    5.47
  -7  12   5  131.82    5.24
  -5  12  -5  133.76    4.80
  -7  12   5  146.13    5.28
  -5  12  -6   89.81    4.33
  -7  12   6   94.59    4.29
  -7  12   6   93.69    4.15
  -7  12   7    2.43    1.78
  -7  12   7    1.46    1.94
  -5  12  -7    0.43    1.80
  -5  12  -8  161.02    6.06
  -7  12   8  158.80    5.73
  -5  12  -9   43.12    3.06
  -7  12   9   41.28    2.76
  -7  12  10   35.04    2.93
  -5  12 -10   31.29    2.86
  -7  12  10   29.74    2.29
  -5  12 -11  108.97    4.63
  -7  12  11  112.81    4.70
  -7  12  11  100.13    4.07
  -7  12  12  140.77    5.35
  -5  12 -12  135.29    5.22
  -7  12  12  129.54    4.61
  -7  12  13   11.75    1.95
  -5  12 -13    8.59    1.97
  -7  12  14   45.33    2.70
  -5  12 -14   46.45    2.66
  -7  12  15   26.36    1.89
  -5  12 -15   26.40    1.92
  -7  12  16    9.56    1.19
  12  -7 -16   11.73    1.72
  -5  12 -16   11.33    1.24
  12  -7 -17   10.28    1.36
  12  -4 -17   14.62    1.44
  -8  12 -17   15.80    1.33
  12  -4 -16   32.64    2.23
  -8  12 -16   36.07    2.19
  -4  12  15   18.38    1.51
  -8  12 -15   19.11    2.12
  -4  12  14   31.54    2.11
  -8  12 -14   30.70    2.61
  -4  12  13   83.58    3.62
  -4  12  12   94.24    4.05
  -4  12  11   24.30    2.50
  -4  12  11   25.26    2.00
  -4  12  10  269.50    8.18
  -4  12  10  257.62    7.78
  -8  -4   9  118.00    4.34
  -4  12   9  120.67    5.02
  -4  12   9  117.23    4.64
  -8  -4   8   52.53    2.79
  -4  12   8   50.92    3.51
  -4  12   8   55.15    3.07
  -8  -4   7  151.88    5.36
  -4  12   7  159.39    5.76
  -8  -4   6   49.11    2.68
  -4  12   6   50.00    3.25
  -8  12  -6   43.78    3.32
  -4  12   6   51.20    3.07
  -4  12   5   29.05    2.70
  -8  12  -5   30.52    2.81
  -4  12   5   31.92    2.62
  -4  12   4   50.32    3.11
  -8  12  -4   51.20    3.23
  -4  12   4   56.56    3.15
  -8  12  -4   50.49    2.61
  -4  12   3   46.22    2.84
  -8  12  -3   41.66    2.97
  -8  12  -3   45.02    2.55
  -4  12   2   89.44    3.83
  -8  12  -2   77.59    3.89
  -4  12   2   81.08    3.86
  -8  12  -2   80.66    3.59
  -4  12   1  316.05    9.35
  -8  12  -1  299.51    9.42
  -4  12   1  296.94    9.33
  -8  12  -1  319.09    9.29
  -8  12   0   13.24    1.86
  -4  12   0   13.46    1.77
  -8  12   0   12.84    1.62
  -8  12   0   13.54    2.00
  -4  12   0   15.97    2.07
  -4  12  -1   37.83    2.39
  -8  12   1   36.12    2.53
  -8  12   1   36.70    2.40
  -4  12  -1   39.12    2.58
  -8  12   1   42.60    2.67
  -4  12  -2  268.74    8.12
  -4  12  -2  276.59    8.73
  -8  12   2  270.62    8.39
  -4  12  -2  270.90    8.37
  -8  12   2  271.63    8.48
  -4  12  -3   46.00    2.99
  -8  12   3   39.55    2.70
  -4  12  -3   45.07    2.63
  -8  12   3   42.01    2.91
  -4  12  -4   94.35    4.38
  -8  12   4  100.24    4.24
  -4  12  -4  100.31    3.97
  -4  12  -5  108.96    4.76
  -8  12   5  111.21    4.66
  -4  12  -5  109.20    4.20
  -8  12   5  109.56    4.58
  -8  12   6   20.08    2.39
  -8  12   6   19.93    2.41
  -4  12  -6   24.13    2.55
  -8  12   7   28.98    2.53
  -8  12   7   27.25    2.67
  -4  12  -7   31.46    2.74
  -4  12  -8  258.81    8.40
  -8  12   8  250.45    8.44
  -8  12   8  260.00    8.19
  -8  12   9   22.65    2.30
  -4  12  -9   19.49    2.39
  -4  12 -10   38.34    2.87
  -8  12  10   36.48    3.09
  -8  12  10   36.90    2.47
  -4  12 -11   98.14    4.26
  -8  12  11  100.43    4.48
  -8  12  11   97.47    3.93
  -4  12 -12   41.71    2.66
  -8  12  12   37.79    2.93
  -8  12  12   40.40    2.27
  -8  12  13   15.71    2.15
  -4  12 -13   17.14    1.94
  -8  12  14   11.21    1.81
  -4  12 -14   10.31    1.54
  -8  12  15    5.94    1.43
  -8  12  16    9.71    1.54
  12  -8 -16    9.79    1.49
  12  -8 -17    2.98    0.96
  12  -3 -17   15.96    1.31
  -9  12 -17   16.41    1.30
  12  -3 -16   23.58    1.87
  -9  12 -16   24.58    1.88
  -3  12  15   17.09    1.33
  12  -3 -15   15.76    1.86
  -9  12 -15   16.68    1.99
  -3  12  14   20.22    1.72
  -3  12  13   60.93    2.93
  -9  -3  12   41.95    2.41
  -3  12  12   47.76    2.83
  -9  12 -12   44.74    2.18
  -9  12 -11   89.14    3.47
  -3  12  11  104.18    4.22
  -9  -3  10  174.10    5.75
  -3  12  10  182.54    6.42
  -3  12  10  189.04    6.13
  -9  -3   9   46.11    2.61
  -3  12   9   46.71    3.20
  -3  12   9   48.99    2.90
  -9  -3   8   69.25    3.25
  -3  12   8   70.09    3.72
  -3  12   8   67.45    3.52
  -9  -3   7  111.40    4.32
  -3  12   7  114.38    4.64
  -9  -3   6    4.42    1.71
  -3  12   6    1.94    1.71
  -9  -3   5   43.31    2.73
  -3  12   5   40.08    2.96
  -9  12  -5   36.46    2.97
  -3  12   5   46.57    2.95
  -9  -3   4   57.01    3.06
  -3  12   4   55.68    3.25
  -9  12  -4   56.31    3.45
  -3  12   4   59.73    3.33
  -9  12  -4   56.19    2.82
  -3  12   3   31.14    2.58
  -9  12  -3   28.49    2.54
  -9  12  -3   28.13    2.14
  -3  12   2  113.45    4.56
  -9  12  -2  113.26    4.65
  -3  12   2  104.24    4.57
  -9  12  -2  112.31    4.35
  -3  12   1   99.96    4.18
  -9  12  -1   96.74    4.20
  -3  12   1  102.12    4.34
  -9  12  -1   99.94    4.16
  -3  12   0   52.64    2.92
  -9  12   0   53.27    2.99
  -9  12   0   53.51    2.76
  -3  12   0   53.64    3.11
  -9  12   0   57.56    3.10
  -3  12  -1  147.31    5.17
  -9  12   1  139.95    5.21
  -9  12   1  144.91    5.18
  -3  12  -1  151.07    5.41
  -9  12   1  145.49    5.39
  -3  12  -2  113.80    4.34
  -9  12   2  110.29    4.45
  -3  12  -2  117.39    4.55
  -9  12   2  120.76    4.75
  -9  12   3   18.69    2.33
  -9  12   3   18.63    2.14
  -3  12  -3   14.83    2.29
  -3  12  -3   17.20    2.01
  -3  12  -4   74.23    3.81
  -3  12  -4   75.23    3.47
  -9  12   4   68.60    3.63
  -3  12  -5   82.50    3.85
  -9  12   5   72.47    3.77
  -9  12   5   70.59    3.77
  -9  12   6   18.81    2.42
  -9  12   6   20.46    2.49
  -9  -3  -6   19.22    1.75
  -3  12  -6   18.67    2.32
  -9  -3  -7  186.57    6.00
  -3  12  -7  205.13    6.87
  -9  12   7  205.42    7.00
  -9  12   7  195.74    6.78
  -3  12  -8  149.57    5.64
  -9  12   8  156.47    5.83
  -9  12   8  145.88    5.53
  -3  12  -9   47.38    2.90
  -9  12   9   49.70    2.94
  -3  12 -10   58.62    3.18
  -9  12  10   58.21    3.08
  -3  12 -11   59.25    3.16
  -9  12  11   66.65    3.66
  -9  12  11   64.48    3.09
  -9  12  12    1.35    1.25
  -9  12  12    1.38    1.93
  -3  12 -12    0.23    1.39
  -3  12 -13   48.56    2.49
  -9  12  13   55.64    3.07
  -9  12  14   14.09    1.79
  -9  12  15    4.91    1.42
  12  -9 -15    4.41    1.42
  -9  12  16   10.99    1.22
  12  -9 -16   10.71    1.27
 -10  12 -17   19.63    1.29
  12  -2 -16    7.55    1.17
 -10  12 -16    8.17    1.41
  12  -2 -15    2.61    1.40
 -10  12 -15    0.96    1.50
  12  -2 -14   67.75    3.14
 -10  -2  13   40.98    2.18
  -2  12  13   42.23    2.36
  -2  12  12    3.37    1.61
 -10  -2  12    3.35    1.43
  -2  12  11  165.84    5.85
 -10  -2  10   64.83    2.94
  -2  12  10   68.09    3.56
 -10  -2   9   47.78    2.65
  -2  12   9   49.35    3.17
 -10  -2   8  132.60    5.00
  -2  12   8  147.31    5.47
  -2  12   8  141.48    5.24
  -2  12   7   14.70    2.43
 -10  -2   7   15.44    2.06
  -2  12   7   11.86    2.04
 -10  -2   6    9.08    1.97
  -2  12   6   13.76    2.24
 -10  -2   5   68.56    3.50
  -2  12   5   79.59    3.86
 -10  12  -5   66.90    3.63
  -2  12   5   73.52    3.77
  -2  12   4   30.59    2.66
 -10  -2   4   29.92    2.49
 -10  12  -4   24.56    2.49
  -2  12   4   27.53    2.60
 -10  12  -4   27.41    2.03
 -10  12  -3   12.85    1.92
  -2  12   3   15.38    2.12
 -10  -2   3   15.86    2.11
 -10  12  -3   12.80    2.06
  -2  12   2   66.67    3.47
 -10  12  -2   62.14    3.30
 -10  12  -2   67.57    3.30
 -10  12  -1    5.58    1.80
  -2  12   1    2.78    1.70
 -10  -2   1    3.10    1.76
 -10  12  -1    2.82    1.59
  -2  12   1    2.71    1.91
 -10  12   0    9.88    1.99
  -2  12   0    7.91    1.74
 -10  -2   0   10.08    1.93
 -10  12   0    7.68    1.59
  -2  12   0    6.69    1.95
 -10  -2  -1  126.60    4.67
  -2  12  -1  132.64    4.77
 -10  12   1  117.70    4.50
  -2  12  -1  120.98    4.86
 -10  12   1  114.66    4.53
 -10  12   1  127.00    4.94
 -10  -2  -2   38.13    2.46
  -2  12  -2   38.86    2.67
 -10  12   2   35.42    2.51
 -10  12   2   38.63    2.80
 -10  12   3   16.92    2.35
 -10  12   3   15.37    1.99
 -10  -2  -3   16.56    1.83
 -10  -2  -4  287.15    8.48
 -10  12   4  284.03    8.91
 -10  -2  -5   90.06    3.64
 -10  12   5   96.31    4.22
 -10  12   5   88.90    4.24
 -10  -2  -6  100.05    3.77
  -2  12  -6  100.71    4.32
 -10  12   6   94.23    4.41
 -10  12   6  104.47    4.46
  -2  12  -7  347.99   10.38
 -10  12   7  335.81   10.54
 -10  12   7  353.09   10.45
 -10  12   8    3.09    1.96
 -10  12   8    4.03    2.05
  -2  12  -8    4.47    1.70
  -2  12  -9   46.56    2.76
 -10  12   9   50.50    3.43
 -10  12   9   50.94    3.02
  -2  12 -10   66.20    3.15
 -10  12  10   70.50    3.29
 -10  12  11   11.98    1.66
 -10  12  11   11.94    2.40
  -2  12 -11   11.71    1.56
 -10  12  12   18.43    1.71
 -10  12  12   17.81    2.29
 -10  12  13   49.76    2.89
 -10  12  14    8.56    1.69
 -10  12  15    4.37    1.32
  12 -10 -15    0.38    1.03
 -10  12  16   10.05    1.09
  12  -1 -15   18.50    1.37
  12  -1 -14   55.81    2.62
 -11  -1  13   11.19    1.42
  12  -1 -13    8.73    1.58
 -11  -1  12   11.72    1.68
  -1  12  11   24.96    2.22
 -11  -1  11   24.05    2.20
 -11  -1  10   82.83    3.38
  -1  12  10   86.42    3.83
  -1  12   9   25.57    2.47
 -11  -1   9   23.97    2.05
 -11  -1   8  106.88    4.23
  -1  12   8  108.17    4.58
  -1  12   7    3.03    2.10
 -11  -1   7    3.65    1.80
 -11  -1   6   66.82    3.38
 -11  -1   5   70.39    3.57
 -11  12  -5   61.48    3.44
 -11  12  -4   19.81    1.85
  -1  12   4   18.50    2.47
 -11  -1   4   18.69    2.36
 -11  12  -4   20.01    2.18
  -1  12   3   34.93    2.78
 -11  12  -3   30.45    2.48
  -1  12   3   31.46    2.81
 -11  12  -3   33.53    2.30
 -11  12  -2   17.30    1.97
  -1  12   2   17.63    2.29
 -11  12  -2   19.54    1.98
 -11  -1   1   31.47    2.59
  -1  12   1   34.60    2.61
 -11  12  -1   27.50    2.16
 -11  12  -1   31.84    2.49
 -11  12   0   15.22    2.08
 -11  -1   0   17.13    2.12
 -11  12   1   31.49    2.64
 -11  -1  -1   29.78    2.41
 -11  12   1   30.65    2.24
 -11  12   2   21.15    2.41
 -11  12   2   20.86    1.96
 -11  -1  -2   20.46    2.14
 -11  12   3   70.08    3.70
 -11  -1  -3   65.02    3.21
 -11  12   3   70.51    3.40
 -11  -1  -4   73.26    3.30
 -11  12   4   77.66    3.74
 -11  -1  -5  306.15    9.03
 -11  12   5  316.59    9.59
 -11  -1  -6   99.38    3.85
 -11  12   6  113.89    4.64
 -11  12   6  108.62    4.70
 -11  12   7  137.42    5.35
 -11  12   7  132.65    5.23
 -11  12   8   43.42    3.15
 -11  12   8   46.77    3.03
 -11  12   9   76.98    3.94
 -11  12   9   75.00    3.60
 -11  12  10   48.14    2.74
 -11  12  11   11.73    1.74
 -11  12  12   18.93    1.67
 -11  12  12   25.64    2.35
 -11  12  13   33.49    2.35
 -11  12  14   10.57    1.64
 -11  12  15   21.71    1.59
 -12  12 -15   76.07    2.88
 -12   0  14   26.23    1.46
 -12  12 -14   31.05    2.05
 -12   0  13   -0.16    1.24
 -12   0  12  139.56    4.76
 -12   0  11    6.51    1.19
 -12   0  11   10.16    1.81
 -12   0  10    3.88    1.39
 -12   0  10    4.43    1.78
 -12   0   9   65.83    3.07
 -12   0   8   28.83    2.27
   0  12   7    3.35    1.89
 -12   0   7    3.91    1.73
 -12   0   6  134.98    5.03
   0  12   6  139.81    5.19
 -12   0   5    7.55    2.00
 -12  12  -5    5.53    1.69
 -12  12  -4    2.11    1.32
 -12   0   4    1.75    2.04
 -12  12  -4    2.52    1.55
 -12  12  -3   51.90    2.85
 -12  12  -3   63.07    2.96
 -12  12  -2   13.69    1.80
 -12   0   2    9.04    2.09
 -12  12  -1   -0.46    1.70
 -12   0   1   -1.53    2.06
 -12  12   0   54.73    3.22
 -12   0   0   54.48    3.20
 -12  12   1    3.00    1.91
 -12  12   1    1.95    1.35
 -12   0  -1    1.38    1.76
 -12  12   2    9.15    2.18
 -12  12   2    9.58    1.75
 -12   0  -2    9.82    1.95
 -12  12   3  136.62    5.44
 -12   0  -3  139.92    4.97
 -12  12   3  135.67    5.11
 -12  12   4   18.63    2.60
 -12  12   4   19.71    2.26
 -12   0  -4   16.60    1.87
 -12   0  -5   90.89    3.59
 -12  12   5   85.15    4.03
 -12  12   6  615.53   16.51
 -12   0  -6  577.68   15.73
 -12  12   6  591.55   16.50
 -12  12   7   61.27    3.39
 -12  12   7   59.62    3.42
 -12  12   8  131.24    5.17
 -12  12   8  130.02    4.96
 -12  12   9   81.40    4.01
 -12  12   9   80.45    3.67
 -12  12  10    7.56    1.75
 -12  12  10   11.94    2.25
 -12  12  11   19.61    1.76
 -12  12  12   17.81    1.57
 -12  12  12   21.47    2.18
 -12  12  13   60.69    2.86
 -12   0 -14    8.65    1.29
 -12  12  14   12.56    1.56
 -12  12  15   16.54    1.27
 -13  12 -14    5.11    1.08
 -13   1  13   35.29    1.85
 -13  12 -13   40.06    2.14
 -13   1  12   36.16    2.14
 -13  12 -12   38.80    2.36
 -13   1  11    2.95    1.02
 -13   1  11    6.57    1.65
 -13   1  10    9.23    1.43
 -13   1  10    8.34    1.88
 -13   1   9   29.98    2.50
 -13   1   9   29.60    2.06
 -13   1   8   20.64    2.04
 -13   1   8   20.05    2.43
 -13  12  -8   17.24    2.02
 -13   1   7   38.37    2.65
 -13  12  -7   42.07    2.60
 -13   1   6   56.69    3.15
 -13  12  -6   51.60    2.80
 -13   1   5   18.39    2.33
 -13  12  -5   13.39    1.76
 -13   1   4   40.86    2.94
 -13  12  -3   70.15    3.19
 -13  12  -2    3.46    1.61
 -13   1   2    4.52    2.08
 -13  12  -1   23.39    2.22
 -13   1   1   22.18    2.50
 -13  12   0   45.05    2.90
 -13   1   0   48.32    2.91
 -13  12   1    4.48    2.00
 -13   1  -1    2.82    1.84
 -13  12   2   77.92    3.76
 -13   1  -2   71.85    3.45
 -13  12   2   68.82    3.27
 -13  12   3   65.49    3.58
 -13   1  -3   64.50    3.11
 -13  12   3   62.18    3.12
 -13  12   4    0.58    2.13
 -13  12   4    1.08    1.64
 -13   1  -4    0.44    1.36
 -13   1  -5  111.13    4.01
 -13  12   5  110.16    4.48
 -13  12   6  172.27    6.24
 -13  12   6  175.11    6.19
 -13  12   7   51.96    3.19
 -13  12   7   58.12    3.33
 -13  12   8   46.69    3.08
 -13  12   8   48.17    3.06
 -13  12   9   19.91    2.15
 -13  12   9   25.08    2.36
 -13  12  10    7.58    1.57
 -13  12  10   10.69    2.04
 -13  12  11   11.03    1.51
 -13  12  12   18.15    1.51
 -13  12  13   16.86    1.70
 -13  12  14    9.10    1.21
 -14  12 -13   56.36    2.16
 -14   2  13   63.75    2.23
 -14   2  12    6.45    1.22
 -14  12 -12    7.48    1.16
 -14   2  11   10.10    1.06
 -14   2  11    9.37    1.56
 -14  12 -11   11.09    1.38
 -14   2  10   51.09    2.80
 -14   2  10   49.68    2.31
 -14  12 -10   48.14    2.34
 -14   2   9   28.00    1.95
 -14  12  -9   24.85    1.85
 -14   2   8   20.29    1.94
 -14  12  -8   16.51    1.63
 -14   2   7   62.16    3.24
 -14   2   7   58.78    3.04
 -14   2   6   19.60    2.15
 -14   2   6   18.92    2.38
 -14   2   5   24.34    2.37
 -14   2   5   19.72    2.36
 -14  12  -3   36.68    2.27
 -14  12  -2    7.45    1.62
 -14   2   2    7.94    1.98
 -14  12  -1   45.14    2.73
 -14   2   1   47.36    2.95
 -14  12   0   23.73    2.29
 -14   2   0   24.01    2.30
 -14  12   1    2.08    1.81
 -14   2  -1    1.76    1.72
 -14  12   2  105.26    4.43
 -14   2  -2  102.66    4.07
 -14  12   2  101.19    3.92
 -14  12   3   52.04    3.13
 -14   2  -3   47.06    2.60
 -14  12   3   46.33    2.64
 -14  12   4   65.15    3.56
 -14   2  -4   57.38    2.73
 -14  12   4   60.03    3.05
 -14   2  -5  121.81    4.28
 -14  12   5  141.82    4.89
 -14  12   6   25.74    2.57
 -14  12   6   20.96    2.22
 -14  12   7    5.97    1.86
 -14  12   7    6.97    1.89
 -14  12   8   85.91    3.79
 -14  12   8   87.07    3.75
 -14  12   9    2.07    1.56
 -14  12   9    0.99    1.68
 -14  12  10   -0.12    1.32
 -14  12  10    1.77    1.67
 -14  12  11   25.26    2.15
 -14  12  11   29.64    1.77
 -14  12  12    4.05    0.89
 -14  12  13    1.59    1.00
 -15   3  12    3.53    0.86
 -15   3  11   14.36    1.36
 -15   3  10   27.82    1.88
 -15   3  10   24.46    1.50
 -15   3   9    7.02    1.31
 -15   3   8   23.00    1.94
 -15   3   7   49.81    2.82
 -15   3   7   48.02    2.63
 -15   3   6   35.22    2.54
 -15   3   6   37.40    2.53
 -15   3   5   35.74    2.48
 -15   3   5   33.32    2.48
 -15   3   4   79.46    3.55
 -15   3   3   25.52    2.14
 -15   3   3   24.53    2.37
 -15  12  -3   23.85    1.79
 -15   3   2   66.63    3.14
 -15   3   2   60.00    3.20
 -15  12  -2   66.08    2.94
 -15  12  -1  114.99    4.24
 -15   3   1  107.88    4.15
 -15   3   1  114.73    4.35
 -15  12   0   14.92    1.96
 -15   3   0   15.62    1.97
 -15   3   0   13.65    1.61
 -15  12   1    7.52    1.91
 -15   3  -1   10.68    1.71
 -15   3  -1   10.33    1.40
 -15  12   2   57.31    3.13
 -15   3  -2   55.02    2.72
 -15  12   3   16.70    2.23
 -15   3  -3   12.38    1.57
 -15  12   3   12.45    1.58
 -15   3  -4   52.76    2.47
 -15  12   4   49.34    2.64
 -15  12   5   57.14    2.84
 -15  12   6   17.17    1.91
 -15  12   7    3.28    1.67
 -15  12   7    4.72    1.63
 -15  12   8   28.34    2.18
 -15  12   8   27.94    2.19
 -15  12   9    2.54    1.29
 -15  12   9    3.85    1.49
 -15  12  10   15.58    1.48
 -15  12  10   19.14    1.73
 -15  12  11   10.93    1.08
 -15  12  11   11.55    1.39
 -16   4   9    8.62    1.04
 -16   4   8   39.81    2.09
 -16   4   8   40.47    2.00
 -16   4   7   11.09    1.51
 -16   4   7    8.68    1.53
 -16   4   6    9.17    1.58
 -16   4   6   13.43    1.68
 -16   4   5   46.57    2.73
 -16   4   5   47.80    3.13
 -16   4   4    2.53    1.42
 -16   4   3    1.40    1.60
 -16   4   3    1.00    1.35
 -16   4   2   29.58    1.94
 -16   4   2   28.29    2.20
 -16  12  -2   27.64    1.82
 -16  12  -1    8.09    1.45
 -16   4   1    6.79    1.67
 -16   4   1    5.72    1.29
 -16  12   0    2.97    1.42
 -16   4   0    2.37    1.41
 -16  12   1   25.59    2.11
 -16   4  -1   22.75    1.88
 -16  12   2   18.14    1.96
 -16   4  -2   14.95    1.55
 -16  12   3    5.38    1.73
 -16   4  -3    4.70    1.17
 -16  12   4   60.56    2.91
 -16  12   4   53.77    2.45
 -16  12   5   14.87    1.95
 -16  12   5   14.05    1.51
 -16  12   6    5.94    1.33
 -16  12   7   34.21    2.00
 -16  12   7   38.07    2.26
 -16  12   8    3.67    1.29
 -16  12   8    5.35    1.25
 -16  12   9    2.07    1.04
 -16  12   9    2.39    1.06
 -16  12  10    9.80    0.98
 -16  12  10   10.59    1.13
 -17   5   8    4.41    0.83
 -17   5   8    6.00    0.92
 -17   5   7    4.20    0.99
 -17   5   7    6.04    1.02
 -17   5   6   24.16    1.52
 -17   5   6   23.79    1.56
 -17   5   5   24.31    1.55
 -17   5   4    3.74    1.31
 -17   5   4    2.29    1.06
 -17   5   3    3.26    1.29
 -17   5   3    3.49    1.00
 -17   5   2    2.85    1.32
 -17   5   2    1.02    0.89
 -17  12  -1    5.90    1.07
 -17   5   1    9.40    1.41
 -17  12   0    6.64    1.25
 -17   5   0    6.63    1.28
 -17   5  -1   17.55    1.42
 -17  12   1   22.19    1.64
 -17  12   2    2.72    1.38
 -17   5  -2    1.42    0.92
 -17  12   3   37.50    2.15
 -17  12   4    4.93    1.30
 -17  12   5    5.99    1.32
 -17  12   6    5.57    0.91
 -17  12   7   18.68    1.17
 -17  12   7   18.79    1.40
 -17  12   8    3.71    0.85
 -18   6   4    0.18    0.81
 -18   6   3    2.37    0.86
 -18   6   2    0.26    0.86
 -18   6   1    2.89    0.84
 -18   6   0    5.38    0.83
 -18  12   1    1.56    0.81
 -18  12   2    0.14    0.76
 -18  12   3   28.68    1.48
 -18  12   4    7.15    0.93
 -18  12   5    5.57    0.86
  -7  13 -16   31.82    1.60
  -6  13  15   12.03    1.34
  -7  13 -15   12.35    1.53
  -6  13  14   32.13    2.24
  -7  13 -14   32.17    2.36
  -6  13  13   32.14    2.33
  -7  13 -13   30.42    2.41
  -6  13  12    9.85    1.83
  -7  13 -12    9.82    2.14
  -6  13  12    7.50    1.33
  -6  13  11   21.17    2.46
  -7  13 -11   18.04    2.43
  -6  13  11   16.95    1.79
  -6  13  10    6.69    2.22
  -7  13 -10    5.37    2.26
  -6  13  10    6.59    1.74
  -7  -6   9  161.47    5.35
  -7  13  -9  167.19    6.31
  -6  13   9  172.44    5.89
  -7  -6   8   10.59    1.54
  -7  13  -8    6.99    2.34
  -6  13   8    6.74    2.00
  -6  13   7   26.98    2.83
  -7  -6   7   25.69    2.14
  -6  13   7   30.67    2.61
  -6  13   6   38.19    2.96
  -6  13   6   35.45    2.74
  -6  13   5  101.01    4.41
  -7  13  -5   90.14    4.54
  -7  13  -5   99.09    3.84
  -6  13   5   97.45    4.33
  -6  13   4  184.63    6.43
  -7  13  -4  177.21    6.60
  -7  13  -4  176.72    5.97
  -6  13   3   47.14    3.00
  -7  13  -3   41.04    3.12
  -7  13  -3   46.34    2.67
  -6  13   2  187.02    6.35
  -7  13  -2  188.46    6.66
  -7  13  -2  180.27    6.23
  -6  13   2  180.49    6.38
  -7  13  -1  139.19    4.91
  -6  13   1  140.39    5.17
  -7  13  -1  144.35    5.56
  -6  13   1  135.18    5.31
  -7  13  -1  138.96    5.17
  -6  13   0  110.70    4.41
  -7  13   0  109.72    4.34
  -7  13   0  124.85    4.90
  -6  13   0  113.03    4.64
  -7  13   0  114.02    4.59
  -6  13  -1   62.15    3.05
  -6  13  -1   69.29    3.66
  -7  13   1   66.59    3.31
  -6  13  -1   65.70    3.36
  -7  13   1   65.29    3.50
  -7  13   2   31.17    2.66
  -7  13   2   32.57    2.48
  -6  13  -2   29.82    2.83
  -6  13  -2   30.46    2.43
  -7  13   3  133.91    5.13
  -6  13  -3  128.99    4.85
  -7  13   3  132.81    5.16
  -7  13   4   81.49    3.84
  -6  13  -4   66.72    3.24
  -7  13   5   12.72    2.26
  -7  13   5    9.53    2.07
  -6  13  -5    9.48    1.59
  -6  13  -6   53.59    3.49
  -7  13   6   48.84    3.29
  -7  13   6   52.04    3.19
  -7  13   7   23.02    2.36
  -7  13   7   25.88    2.76
  -6  13  -7   24.85    2.70
  -6  -7   8  105.47    3.97
  -6  13  -8  113.04    4.89
  -7  13   8  105.65    4.78
  -7  13   8  107.65    4.55
  -6  -7   9   64.44    2.83
  -6  13  -9   72.74    3.92
  -7  13   9   72.04    3.37
  -7  13  10   81.43    3.99
  -6  13 -10   78.38    4.00
  -7  13  10   78.07    3.53
  -7  13  11   31.80    2.75
  -6  13 -11   37.12    2.82
  -7  13  11   38.02    2.35
  -7  13  12   59.32    3.16
  -6  13 -12   57.38    3.12
  -7  13  12   54.24    2.56
  -7  13  13   29.90    2.28
  -6  13 -13   32.32    2.37
  -7  13  14   10.40    1.63
  -6  13 -14    9.61    1.78
  -7  13  15   15.63    1.39
  -6  13 -15   14.02    1.43
  13  -7 -16    8.57    1.34
  13  -5 -16   34.05    1.94
  -8  13 -16   37.66    1.82
  -5  13  15    2.18    1.08
  13  -5 -15    2.59    1.45
  -8  13 -15    0.06    1.30
  -5  13  14   52.75    2.51
  -8  13 -14   49.95    2.78
  -5  13  13   32.02    2.23
  -8  13 -13   32.18    2.51
  -5  13  12    0.95    1.72
  -8  13 -12    1.59    2.02
  -5  13  11    6.78    1.99
  -8  13 -11   10.32    2.27
  -5  13  11   11.52    1.61
  -5  13  10   95.18    4.35
  -8  13 -10   91.05    4.40
  -5  13  10   91.85    3.79
  -8  -5   9  110.52    4.07
  -5  13   9  109.61    4.84
  -5  13   9  113.44    4.47
  -8  -5   8   26.42    2.09
  -5  13   8   32.46    2.58
  -5  13   7   25.96    2.83
  -8  -5   7   24.55    2.15
  -8  13  -7   20.14    2.81
  -5  13   7   24.91    2.48
  -5  13   6    7.14    2.33
  -8  -5   6    7.43    1.61
  -8  13  -6    5.82    2.15
  -5  13   6    6.04    2.06
  -5  13   5   61.59    3.48
  -8  13  -5   55.28    3.65
  -5  13   5   52.34    3.26
  -5  13   4   42.77    2.97
  -8  13  -4   46.58    3.25
  -8  13  -4   45.68    2.51
  -8  13  -3    1.45    1.42
  -5  13   3    3.75    1.85
  -8  13  -3    0.96    1.87
  -5  13   2  229.97    7.58
  -8  13  -2  238.38    7.85
  -5  13   2  239.20    7.69
  -8  13  -2  226.99    7.42
  -5  13   1  277.93    8.50
  -8  13  -1  268.40    8.73
  -5  13   1  262.21    8.64
  -8  13  -1  284.05    8.55
  -5  13   0   49.88    2.78
  -8  13   0   46.53    3.01
  -8  13   0   43.67    2.60
  -5  13   0   48.85    3.04
  -8  13   0   45.45    2.86
  -5  13  -1   42.53    2.50
  -8  13   1   43.15    2.77
  -5  13  -1   42.32    2.87
  -8  13   1   39.91    2.88
  -5  13  -2  125.81    4.59
  -8  13   2  131.38    4.99
  -5  13  -2  131.64    4.98
  -8  13   2  131.49    5.15
  -5  13  -3   79.28    4.13
  -8  13   3   82.43    3.86
  -5  13  -3   86.85    3.78
  -8  13   3   82.46    3.96
  -8  13   4   31.78    2.61
  -5  13  -4   32.42    2.84
  -5  13  -4   31.13    2.28
  -8  13   5    3.80    2.07
  -8  13   5    3.92    1.96
  -5  13  -5    0.86    2.24
  -5  13  -5    2.97    1.38
  -8  13   6   19.59    2.47
  -8  13   6   17.96    2.53
  -5  13  -6   17.15    2.52
  -8  13   7   11.44    2.18
  -8  13   7    9.96    2.31
  -5  13  -7    9.06    2.34
  -5  13  -8  120.68    5.19
  -8  13   8  138.08    5.36
  -8  13   8  126.65    4.98
  -8  13   9   10.00    1.91
  -5  13  -9    6.66    2.10
  -5  13 -10   57.70    3.35
  -8  13  10   61.92    3.03
  -5  13 -11   47.80    2.97
  -8  13  11   48.33    3.09
  -8  13  11   47.91    2.57
  -5  13 -12   60.54    3.16
  -8  13  12   64.45    3.29
  -8  13  12   60.23    3.02
  -8  13  13   -0.37    1.67
  -5  13 -13    1.61    1.49
  -8  13  14   11.52    1.83
  -5  13 -14   10.14    1.47
  -8  13  15    6.77    1.20
  -5  13 -15    7.68    1.14
  13  -8 -16    4.10    1.09
  13  -4 -16   12.41    1.26
  -9  13 -16   17.60    1.35
  13  -4 -15    5.02    1.38
  -9  13 -15    5.86    1.43
  -4  13  14   15.26    1.47
  -9  13 -14   19.26    2.00
  -4  13  13   15.03    1.74
  -9  13 -13   16.40    2.21
  -9  -4  12   29.57    1.84
  -4  13  12   33.09    2.41
  -9  13 -12   31.86    2.81
  -4  13  11   29.77    2.49
  -9  -4  10  100.77    3.76
  -4  13  10  111.50    4.50
  -4  13  10  108.48    4.13
  -9  -4   9   34.62    2.19
  -4  13   9   34.30    2.91
  -9  13  -9   38.97    3.20
  -4  13   9   37.15    2.57
  -9  -4   8   28.48    2.18
  -9  13  -8   29.45    2.96
  -4  13   8   29.36    2.46
  -9  -4   7   34.38    2.44
  -9  13  -7   35.73    3.14
  -4  13   7   37.18    2.77
  -4  13   6   27.69    2.72
  -9  -4   6   34.93    2.37
  -9  13  -6   27.26    2.83
  -4  13   6   30.30    2.66
  -9  -4   5   81.08    3.78
  -4  13   5   88.06    4.10
  -9  13  -5   79.60    4.15
  -4  13   5   80.64    3.96
  -9  13  -4    3.57    1.40
  -4  13   4    3.00    2.06
  -9  -4   4    3.14    1.73
  -9  13  -4    2.36    2.01
  -4  13   4    1.90    2.14
  -9  13  -3    7.85    1.65
  -4  13   3    7.08    2.04
  -9  13  -3    8.06    2.02
  -4  13   2  197.15    6.73
  -9  13  -2  197.66    6.91
  -4  13   2  200.87    6.91
  -9  13  -2  203.47    6.65
  -4  13   1  157.10    5.66
  -9  13  -1  157.78    5.82
  -4  13   1  153.68    5.88
  -9  13  -1  165.59    5.79
  -4  13   0   45.85    2.72
  -9  13   0   46.58    2.91
  -9  13   0   40.81    2.51
  -4  13   0   40.93    2.95
  -9  13   0   37.39    2.76
  -4  13  -1   44.53    2.56
  -9  13   1   38.17    2.52
  -4  13  -1   45.77    2.91
  -9  13   1   37.82    2.86
  -4  13  -2   96.86    3.89
  -9  13   2  105.91    4.27
  -4  13  -2  102.52    4.28
  -9  13   2   91.10    4.27
  -9  13   3   16.02    2.41
  -9  13   3   17.18    2.07
  -4  13  -3   16.12    2.04
  -9  13   4    1.40    1.70
  -4  13  -4   -2.01    2.05
  -4  13  -4    1.92    1.56
  -9  13   5    5.68    2.28
  -9  13   5    8.67    2.14
  -4  13  -5    4.83    2.19
  -9  13   6    9.31    2.25
  -9  13   6    9.30    2.22
  -4  13  -6   11.33    2.16
  -9  13   7    6.63    2.00
  -9  13   7    5.70    2.15
  -9  -4  -7    5.85    1.35
  -4  13  -7    5.92    1.99
  -4  13  -8   84.70    4.12
  -9  13   8   86.19    4.22
  -9  13   8   91.54    3.96
  -4  13  -9   54.05    3.13
  -9  13   9   52.87    3.43
  -9  13   9   54.69    3.06
  -9  13  10   10.16    1.78
  -4  13 -10   10.63    1.92
  -4  13 -11   49.30    2.83
  -9  13  11   52.73    3.19
  -9  13  11   53.23    2.68
  -4  13 -12   33.94    2.28
  -9  13  12   35.09    2.62
  -9  13  12   36.23    2.05
  -9  13  13   12.33    1.92
  -4  13 -13   11.17    1.46
  -9  13  14   18.25    1.76
  -9  13  15   -0.28    1.02
  13  -9 -15    0.77    1.12
  13  -9 -16    6.30    0.91
 -10  13 -16    2.24    0.93
  13  -3 -15    7.84    1.24
 -10  13 -15    7.70    1.38
  13  -3 -14   31.05    2.08
 -10  13 -14   31.95    2.29
  -3  13  13   10.04    1.50
 -10  -3  12   36.82    2.09
  -3  13  12   39.87    2.36
  -3  13  11   97.59    3.98
 -10  13 -11   92.90    4.34
  -3  13  10   22.47    2.35
 -10  -3  10   21.17    1.70
 -10  13 -10   21.71    2.66
 -10  -3   9   33.15    2.20
  -3  13   9   34.79    2.84
 -10  13  -9   35.75    2.93
 -10  -3   8   41.17    2.56
  -3  13   8   43.83    3.13
 -10  13  -8   48.87    3.30
  -3  13   8   47.86    2.87
 -10  -3   7   51.31    2.95
 -10  13  -7   51.56    3.41
  -3  13   7   48.58    3.07
 -10  -3   6   54.48    3.05
  -3  13   6   57.00    3.49
 -10  13  -6   50.86    3.31
  -3  13   6   58.53    3.40
 -10  -3   5   30.89    2.48
  -3  13   5   35.76    2.89
 -10  13  -5   25.57    2.72
  -3  13   5   29.70    2.73
 -10  13  -4   11.42    1.62
  -3  13   4   10.46    2.07
 -10  -3   4   15.80    2.14
 -10  13  -4   14.02    2.17
  -3  13   4   13.18    2.35
 -10  -3   3   39.95    2.83
  -3  13   3   44.78    3.02
 -10  13  -3   38.69    2.46
  -3  13   2   78.76    3.85
 -10  13  -2   78.46    3.83
  -3  13   2   82.21    4.07
 -10  13  -2   84.84    3.73
 -10  13  -1   28.87    2.41
  -3  13   1   25.89    2.36
 -10  -3   1   27.16    2.52
 -10  13  -1   25.77    2.29
  -3  13   1   27.80    2.62
 -10  -3   0   41.44    2.74
  -3  13   0   48.25    2.79
 -10  13   0   42.79    2.68
  -3  13   0   45.03    2.99
 -10  13   0   42.13    2.93
 -10  -3  -1   52.41    3.02
  -3  13  -1   46.11    2.74
 -10  13   1   49.24    2.73
  -3  13  -1   51.38    3.13
 -10  13   1   48.13    3.16
 -10  -3  -2   40.59    2.65
 -10  13   2   34.88    2.43
  -3  13  -2   40.18    2.72
 -10  13   2   38.44    2.92
 -10  -3  -3   70.56    3.28
 -10  13   3   63.58    3.33
 -10  13   3   68.91    3.73
 -10  -3  -4   68.46    3.20
 -10  13   4   64.62    3.49
 -10  13   5    3.11    1.95
 -10  -3  -5    6.95    1.47
 -10  -3  -6   41.64    2.35
 -10  13   6   42.45    3.08
 -10  13   6   43.77    3.03
 -10  -3  -7   91.87    3.46
  -3  13  -7   88.98    4.04
 -10  13   7   92.09    4.27
 -10  13   7   94.74    4.25
 -10  13   8   21.18    2.37
 -10  13   8   20.82    2.66
  -3  13  -8   21.22    2.19
  -3  13  -9   48.30    2.80
 -10  13   9   53.43    3.32
 -10  13   9   47.31    2.89
 -10  13  10   15.75    1.85
  -3  13 -10   11.67    1.75
 -10  13  11   23.09    1.92
 -10  13  12   21.57    2.27
 -10  13  12   22.91    1.71
 -10  13  13   27.48    2.30
 -10  13  14   18.67    1.75
 -10  13  15    2.11    1.00
  13 -10 -15    1.31    0.81
  13  -2 -14   21.86    1.54
 -11  13 -14   29.93    2.00
 -11  -2  13    3.21    1.04
  13  -2 -13    4.05    1.36
 -11  13 -13    3.67    1.69
 -11  -2  12    1.38    1.21
 -11  13 -12    2.25    1.78
  -2  13  11   21.92    2.03
 -11  -2  11   20.62    1.93
 -11  13 -11   21.61    2.25
 -11  -2  10   33.76    2.00
  -2  13  10   34.49    2.52
 -11  13 -10   30.64    2.69
  -2  13   9   11.82    2.02
 -11  -2   9   13.50    1.66
 -11  13  -9   15.68    2.34
 -11  -2   8   61.98    3.06
  -2  13   8   63.84    3.41
 -11  13  -8   60.93    3.53
 -11  -2   7   52.89    2.94
 -11  13  -7   51.93    3.29
 -11  -2   6   45.40    2.87
 -11  13  -6   42.49    3.00
 -11  -2   5   31.60    2.58
  -2  13   5   31.70    2.78
 -11  13  -5   24.23    2.51
  -2  13   5   32.17    2.76
 -11  13  -4   14.64    1.69
  -2  13   4   18.80    2.50
 -11  -2   4   13.96    2.19
 -11  13  -4   16.54    2.22
  -2  13   4   14.45    2.42
 -11  -2   3   42.47    2.96
  -2  13   3   39.84    2.82
 -11  13  -3   35.56    2.74
 -11  13  -3   38.27    2.48
  -2  13   2   52.21    3.11
 -11  13  -2   45.70    2.85
  -2  13   2   50.42    3.43
 -11  13  -2   49.40    2.90
 -11  13  -1    2.21    1.78
  -2  13   1    6.80    1.93
 -11  -2   1    4.20    1.98
 -11  13  -1    4.20    1.49
  -2  13   1    4.80    2.02
 -11  13   0   12.81    2.11
 -11  -2   0    9.55    1.97
 -11  13   0   10.27    1.64
 -11  13   1   24.31    2.52
 -11  -2  -1   22.99    2.32
 -11  13   1   24.90    2.03
 -11  -2  -2   50.09    2.91
 -11  13   2   51.26    2.82
 -11  13   2   51.47    3.23
 -11  13   3   14.99    2.37
 -11  13   3   14.80    1.99
 -11  -2  -3   15.00    1.94
 -11  -2  -4  165.96    5.53
 -11  13   4  160.07    5.85
 -11  13   4  159.50    6.05
 -11  -2  -5  159.24    5.38
 -11  13   5  171.09    6.01
 -11  13   6   14.43    2.50
 -11  13   6   19.00    2.32
 -11  -2  -6   13.17    1.55
 -11  13   7  100.23    4.54
 -11  13   7  100.28    4.38
 -11  13   8   18.61    2.35
 -11  13   8   23.12    2.54
 -11  13   9   13.64    1.93
 -11  13   9   13.04    2.26
 -11  13  10   17.59    1.90
 -11  13  10   20.41    2.50
 -11  13  11   22.25    1.85
 -11  13  12    2.20    1.09
 -11  13  12    0.74    1.71
 -11  13  13   32.64    2.21
 -11  13  14   10.17    1.41
 -11  13  15    9.97    1.04
 -12  13 -14    4.72    1.16
 -12  -1  13   36.52    1.84
 -12  13 -13   40.47    2.21
 -12  -1  12   38.06    2.24
  13  -1 -12   31.29    1.88
 -12  13 -12   37.72    2.40
 -12  -1  11    5.41    1.53
 -12  13 -11    5.64    1.64
 -12  -1  10    6.21    1.30
 -12  -1  10   11.00    1.77
 -12  13 -10    7.69    1.97
 -12  -1   9   33.03    2.17
 -12  13  -9   35.03    2.60
 -12  -1   8   20.91    1.98
 -12  13  -8   19.21    2.28
 -12  -1   7   40.91    2.63
  -1  13   7   39.97    2.84
 -12  13  -7   38.30    2.74
 -12  -1   6   53.04    3.06
 -12  13  -6   51.76    3.05
  -1  13   5   19.80    2.47
 -12  -1   5   16.27    2.28
 -12  13  -5   16.50    2.10
 -12  -1   4   34.16    2.73
 -12  13  -4   29.14    2.36
 -12  13  -3   67.17    3.28
 -12  13  -3   73.21    3.27
 -12  13  -2    3.76    1.60
 -12  13  -2    3.98    1.44
 -12  13  -1   21.05    2.25
 -12  -1   1   19.17    2.52
 -12  -1   0   42.57    2.84
 -12  13   0   47.18    2.94
 -12  13   1    5.62    2.07
 -12  -1  -1    5.86    1.85
 -12  -1  -2   83.08    3.65
 -12  13   2   73.92    3.44
 -12  13   2   80.77    3.91
 -12  -1  -3   67.94    3.26
 -12  13   3   71.00    3.41
 -12  13   3   75.01    3.81
 -12  13   4   -2.80    2.08
 -12  13   4    1.92    1.68
 -12  -1  -4    0.45    1.46
 -12  -1  -5  103.95    3.93
 -12  13   5  100.19    4.35
 -12  -1  -6  160.69    5.37
 -12  13   6  173.05    6.11
 -12  13   7   58.80    3.30
 -12  13   7   54.83    3.30
 -12  13   8   47.31    3.06
 -12  13   8   44.40    2.94
 -12  13   9   16.51    2.04
 -12  13   9   17.68    2.29
 -12  13  10    8.20    1.66
 -12  13  10    9.98    2.13
 -12  13  11   12.55    1.55
 -12  13  12   14.39    1.47
 -12  13  12   20.87    2.04
 -12  13  13   17.35    1.71
 -12  13  14    6.26    1.13
 -13   0  13   19.89    1.19
 -13  13 -13   22.97    1.52
 -13   0  12   41.81    2.06
 -13  13 -12   42.07    2.16
 -13   0  11   14.67    1.65
 -13  13 -11   17.21    1.80
 -13   0  10    1.11    1.12
 -13   0  10   -1.48    1.51
 -13  13 -10   -0.07    1.44
 -13   0   9   31.68    2.43
 -13   0   9   30.27    1.97
 -13  13  -9   27.75    2.16
 -13   0   8   -0.20    1.45
 -13   0   8    0.87    1.79
 -13  13  -8    1.30    1.54
 -13   0   7   14.02    1.90
 -13  13  -7   11.73    1.81
 -13   0   6   49.96    2.83
 -13  13  -6   40.48    2.53
 -13   0   5   47.86    2.90
 -13  13  -5   38.48    2.40
 -13   0   4   28.13    2.53
 -13  13  -4   26.44    1.99
 -13  13  -3   71.02    3.14
 -13   0   2   40.22    2.91
 -13  13  -2   38.22    2.50
 -13   0   1   28.92    2.57
 -13  13  -1   29.03    2.41
 -13  13   0   11.06    1.99
 -13   0   0   10.92    1.97
 -13   0  -1   67.10    3.32
 -13  13   1   68.07    3.52
 -13  13   2   31.49    2.62
 -13   0  -2   32.12    2.30
 -13  13   2   29.67    2.10
 -13  13   3    4.19    2.11
 -13  13   3    7.84    1.59
 -13   0  -3    5.99    1.59
 -13  13   4    1.29    2.05
 -13  13   4    0.68    1.56
 -13   0  -4   -0.49    1.26
 -13   0  -5   26.11    1.88
 -13  13   5   29.24    2.35
 -13  13   6  128.93    4.83
 -13  13   6  118.16    4.83
 -13  13   7   18.25    2.24
 -13  13   7   18.66    2.24
 -13  13   8    2.41    1.73
 -13  13   8    1.41    1.76
 -13  13   9   14.99    1.90
 -13  13   9   13.24    2.06
 -13  13  10   11.32    1.64
 -13  13  10   16.33    2.03
 -13  13  11    6.09    1.25
 -13  13  11    5.70    1.71
 -13  13  12   17.78    1.37
 -13  13  13    4.07    1.15
 -13  13  14    1.75    0.74
 -14   1  12    2.38    0.89
 -14  13 -12    0.43    0.75
 -14   1  11   25.01    1.73
 -14  13 -11   23.66    1.53
 -14   1  10   14.34    1.27
 -14  13 -10   13.64    1.42
 -14   1   9   12.91    1.93
 -14   1   9   13.45    1.82
 -14  13  -9    9.93    1.38
 -14   1   8   10.96    1.60
 -14  13  -8    8.45    1.34
 -14   1   7   41.68    2.46
 -14  13  -7   34.67    2.02
 -14   1   6    3.61    1.67
 -14   1   6    5.19    1.88
 -14   1   5   38.64    2.55
 -14  13  -3   49.38    2.50
 -14   1   2   37.64    2.66
 -14  13  -2   32.92    2.25
 -14   1   1   36.90    2.62
 -14  13  -1   33.94    2.37
 -14  13   0   13.12    1.97
 -14   1   0    8.08    1.83
 -14   1  -1   53.21    2.90
 -14  13   1   51.50    3.03
 -14   1  -2   56.72    2.82
 -14  13   2   53.11    3.08
 -14  13   3   13.69    2.21
 -14  13   3   14.51    1.71
 -14   1  -3   14.23    1.68
 -14  13   4   27.91    2.47
 -14   1  -4   26.66    1.90
 -14  13   4   27.44    2.09
 -14   1  -5   68.64    2.76
 -14  13   5   69.40    3.24
 -14  13   6    4.38    1.68
 -14  13   7   48.27    2.79
 -14  13   7   48.19    2.81
 -14  13   8   32.25    2.32
 -14  13   8   29.50    2.26
 -14  13   9    1.30    1.52
 -14  13   9    1.29    1.54
 -14  13  10   16.28    1.53
 -14  13  10   15.52    1.77
 -14  13  11   10.40    1.14
 -14  13  11    8.78    1.48
 -14  13  13    0.29    0.78
 -15   2  11   16.14    1.20
 -15   2  10    5.42    0.86
 -15   2  10    4.86    1.18
 -15   2   9    8.58    1.16
 -15   2   9    9.59    1.55
 -15   2   8   18.83    1.63
 -15   2   7   30.70    2.25
 -15   2   7   30.12    2.15
 -15   2   6    8.79    1.63
 -15   2   6   12.43    1.85
 -15   2   5   37.42    2.41
 -15   2   5   34.76    2.37
 -15   2   4   58.68    2.93
 -15   2   3   48.51    2.64
 -15   2   3   43.50    2.67
 -15   2   2   57.51    2.82
 -15   2   2   60.67    3.09
 -15  13  -2   56.50    2.66
 -15   2   1   94.58    3.68
 -15   2   1   97.42    3.89
 -15  13  -1   94.54    3.70
 -15  13   0   11.17    1.74
 -15   2   0    9.65    1.81
 -15   2   0    9.75    1.49
 -15   2  -1   28.50    1.87
 -15  13   1   29.61    2.28
 -15  13   2   25.73    2.30
 -15   2  -2   28.26    1.98
 -15  13   3   12.16    2.02
 -15   2  -3   10.71    1.48
 -15  13   4   14.62    2.06
 -15   2  -4   10.19    1.35
 -15  13   4   14.69    1.56
 -15  13   5   41.90    2.29
 -15  13   5   38.73    2.57
 -15  13   6   17.94    1.75
 -15  13   7    1.81    1.54
 -15  13   7    3.74    1.63
 -15  13   8   18.74    1.77
 -15  13   8   15.89    1.69
 -15  13   9   13.24    1.45
 -15  13   9   12.23    1.54
 -15  13  10    4.98    1.04
 -15  13  10    6.03    1.22
 -15  13  11   15.99    1.28
 -16   3  10    2.08    0.79
 -16   3   8   17.80    1.42
 -16   3   8   17.26    1.29
 -16   3   7    1.95    1.13
 -16   3   7    0.98    1.26
 -16   3   6   23.43    1.80
 -16   3   6   22.88    1.76
 -16   3   5   27.27    1.88
 -16   3   5   25.60    1.94
 -16   3   4    6.33    1.44
 -16   3   3   11.81    1.80
 -16   3   3   10.15    1.50
 -16   3   2   24.39    1.73
 -16   3   2   25.35    2.07
 -16  13  -2   21.23    1.51
 -16   3   1   23.92    1.67
 -16   3   1   22.74    1.95
 -16  13  -1   24.07    1.71
 -16   3   0   17.65    1.41
 -16  13   0   18.11    1.69
 -16   3   0   19.15    1.76
 -16  13   1   11.61    1.69
 -16   3  -1   11.57    1.49
 -16  13   2    5.69    1.59
 -16   3  -2    5.83    1.23
 -16  13   3    3.79    1.44
 -16   3  -3    3.63    1.08
 -16  13   4   33.20    2.22
 -16  13   5    3.87    1.55
 -16  13   5    2.64    1.04
 -16  13   6   20.44    1.51
 -16  13   7   11.98    1.43
 -16  13   7    9.79    1.24
 -16  13   8    5.58    1.14
 -16  13   8    4.59    1.06
 -16  13   9    7.82    0.98
 -16  13   9    8.55    1.05
 -17   4   7   11.42    1.00
 -17   4   7    9.92    0.98
 -17   4   6   16.26    1.21
 -17   4   6   21.22    1.34
 -17   4   5   15.63    1.24
 -17   4   4    5.06    1.25
 -17   4   4    3.56    0.95
 -17   4   3    7.30    1.27
 -17   4   3    5.82    0.99
 -17   4   2    4.01    1.19
 -17   4   2    2.15    0.81
 -17  13  -1    2.95    0.92
 -17   4   1    2.18    1.09
 -17  13   0    5.97    1.09
 -17   4   0    4.23    1.08
 -17  13   1   10.83    1.27
 -17   4  -1   10.46    1.17
 -17  13   2    3.49    1.18
 -17   4  -2    2.56    0.86
 -17  13   3   17.60    1.48
 -17  13   4    7.63    1.27
 -17  13   5    9.48    1.26
 -17  13   7    7.37    0.99
 -18   5   3    2.25    0.71
 -18   5   2    2.91    0.74
 -18   5   1    1.91    0.74
  -7  14   0   12.62    1.70
  -7  14   0   11.15    2.10
  -7  14   1   74.91    3.54
  -7  14  -1   78.18    3.79
  -7  14   1   85.32    3.96
  -7  14   2   52.13    3.04
  -7  14  -2   54.24    3.41
  -7  14  -2   45.50    2.88
  -7  14   2   50.13    3.26
  -7  14   3    2.13    1.78
  -7  14  -3    0.75    2.22
  -7  14  -3    1.13    1.55
  -7  14   3    1.28    2.14
  -7  14   4   91.34    4.15
  -7  14  -4   85.02    4.32
  -7  14  -4   77.92    3.53
  -7  14   5  145.04    5.59
  -7  14   5  146.04    5.57
  -7  14   6   24.97    2.50
  -7  14   6   22.76    2.57
  -7  -7   7   89.30    3.61
  -7  14   7   89.26    4.32
  -7  14  -7   96.42    4.51
  -7  14   7   89.99    4.05
  -7  -7   8   46.34    2.40
  -7  14   8   55.55    3.30
  -7  14  -8   48.77    3.31
  -7  14   8   46.31    2.99
  -7  -7   9   10.22    1.33
  -7  14  -9   13.64    2.36
  -7  14   9   10.91    1.87
  -7  14  10  119.79    4.95
  -7  14  10  129.41    4.68
  -7  14  11   83.77    3.74
  -7  14 -11   82.58    3.81
  -7  14  11   84.72    3.32
  -7  14  12    5.80    1.73
  -7  14 -12    5.18    1.79
  -7  14  13   55.76    2.58
  -7  14 -13   49.71    2.60
  -7  14  14   19.73    1.47
  -7  14 -14   21.10    1.58
  14  -7 -15    0.47    1.02
  14  -6 -15    0.88    1.03
  -8  14 -15    2.95    0.96
  -6  14  14   46.43    2.08
  -8  14 -14   47.06    2.32
  -6  14  13    7.02    1.45
  -8  14 -13    5.58    1.59
  -6  14  12    4.61    1.70
  -8  14 -12    5.61    1.88
  -6  14  11   82.31    3.60
  -8  14 -11   72.74    3.67
  -6  14  11   78.41    3.14
  -6  14  10   19.17    2.25
  -8  14 -10   22.27    2.49
  -6  14  10   17.36    1.89
  -8  -6   9    2.48    1.22
  -8  14  -9    2.07    2.31
  -6  14   9    2.41    1.68
  -8  -6   8  115.30    4.25
  -6  14   8  127.37    4.74
  -6  14   7   21.14    2.53
  -8  -6   7   20.59    1.96
  -6  14   7   20.31    2.33
  -6  14   6    1.69    2.07
  -8  -6   6    3.32    1.53
  -8  14  -6    4.06    2.21
  -6  14   6    1.52    2.00
  -6  14   5  136.41    5.23
  -8  14  -5  121.26    5.33
  -6  14   5  132.70    5.19
  -6  14   4   13.12    2.08
  -8  14  -4   11.91    2.42
  -8  14  -4    6.89    1.54
  -6  14   3   28.20    2.52
  -8  14  -3   28.96    2.91
  -8  14  -3   28.66    2.33
  -6  14   3   31.29    2.86
  -6  14   2   85.18    3.90
  -8  14  -2   86.84    4.16
  -6  14   2   83.24    4.08
  -8  14  -2   84.25    3.79
  -8  14  -1    1.76    1.78
  -6  14   1    1.71    1.56
  -6  14   1    1.86    2.01
  -8  14   0    1.14    1.86
  -6  14   0    1.28    1.51
  -8  14   0    2.04    1.36
  -6  14   0    2.62    1.94
  -6  14  -1  139.38    4.99
  -8  14   1  141.38    5.16
  -6  14  -1  143.82    5.38
  -8  14   1  155.58    5.57
  -8  14   2   42.89    2.74
  -6  14  -2   40.36    2.76
  -8  14   2   41.36    2.87
  -8  14   3   39.69    2.79
  -6  14  -3   44.03    2.67
  -8  14   3   40.69    3.06
  -8  14   4   84.95    3.97
  -6  14  -4   78.21    3.50
  -8  14   5   19.81    2.55
  -8  14   5   20.62    2.33
  -6  14  -5   21.12    2.69
  -6  14  -5   19.83    1.82
  -8  14   6    2.63    1.97
  -8  14   6    0.90    2.10
  -6  14  -6    3.04    2.23
  -6  14  -7  119.31    5.11
  -8  14   7  122.38    5.02
  -8  14   7  122.01    4.87
  -8  14   8   12.45    2.33
  -6  -8   8   11.98    1.46
  -6  14  -8   13.95    2.38
  -8  14   8   13.12    2.00
  -6  14  -9    8.19    1.96
  -8  14   9    6.27    1.76
  -6  14 -10  198.66    6.60
  -8  14  10  191.05    6.22
  -8  14  11   32.00    2.53
  -6  14 -11   35.59    2.50
  -8  14  11   32.01    2.05
  -8  14  12   42.42    2.57
  -6  14 -12   40.85    2.47
  -8  14  12   36.24    1.91
  -8  14  13   46.17    2.41
  -6  14 -13   39.97    2.25
  -8  14  14   -0.52    1.04
  -6  14 -14   -0.27    0.92
  14  -8 -15    2.40    1.01
  14  -5 -15    6.25    1.05
  -9  14 -15    7.87    1.04
  -5  14  14   13.41    1.18
  -9  14 -14   10.91    1.44
  -5  14  13    0.80    1.23
  -9  14 -13    0.46    1.50
  -5  14  12   48.95    2.83
  -9  14 -12   50.36    2.96
  -5  14  11   55.25    2.97
  -5  14  10    4.72    1.80
  -5  14  10    4.31    1.44
  -9  -5   9   36.24    2.13
  -5  14   9   37.66    2.83
  -5  14   9   42.11    2.54
  -9  -5   8  117.99    4.31
  -9  14  -8  121.79    5.08
  -5  14   8  122.23    4.73
  -5  14   7   15.07    2.27
  -9  -5   7   18.88    1.97
  -9  14  -7   14.79    2.47
  -5  14   7   16.81    2.25
  -9  -5   6   73.39    3.35
  -5  14   6   79.51    3.80
  -9  14  -6   68.91    3.86
  -5  14   6   74.77    3.69
  -9  -5   5   85.84    3.84
  -5  14   5   93.24    4.15
  -9  14  -5   81.60    4.24
  -5  14   5   85.54    4.18
  -5  14   4    5.17    2.03
  -9  -5   4    3.50    1.82
  -9  14  -4    3.79    2.05
  -9  14  -4    5.91    1.45
  -9  -5   3   68.13    3.37
  -5  14   3   59.81    3.42
  -9  14  -3   57.48    3.53
  -9  14  -3   60.91    3.06
  -5  14   2   68.34    3.41
  -9  14  -2   63.53    3.54
  -5  14   2   68.84    3.70
  -9  14  -2   65.45    3.29
  -5  14   1   38.70    2.69
  -9  14  -1   37.20    2.80
  -5  14   1   39.48    2.89
  -9  14  -1   33.89    2.56
  -9  14   0   19.52    2.28
  -5  14   0   19.39    2.08
  -5  14   0   18.49    2.31
  -5  14  -1   52.98    2.79
  -9  14   1   51.00    2.78
  -5  14  -1   58.49    3.24
  -9  14   1   54.55    3.23
  -9  14   2   40.74    2.68
  -5  14  -2   36.81    2.60
  -9  14   2   41.27    2.93
  -9  14   3   72.21    3.52
  -5  14  -3   73.70    3.44
  -9  14   3   69.13    3.82
  -9  14   4   24.48    2.43
  -5  14  -4   23.51    2.05
  -9  14   5    3.86    1.79
  -5  14  -5    5.57    2.26
  -9  14   6   16.01    2.24
  -9  14   6   16.65    2.34
  -9  -5  -6   16.97    1.73
  -5  14  -6   15.98    2.42
  -9  -5  -7   94.98    3.56
  -5  14  -7  101.04    4.40
  -9  14   7   95.85    4.36
  -9  14   7   97.73    4.22
  -9  14   8    7.65    1.90
  -9  14   8    4.68    2.13
  -5  14  -8    7.78    1.98
  -5  14  -9   79.82    3.72
  -9  14   9   81.67    3.90
  -9  14   9   78.69    3.54
  -5  14 -10  133.09    4.87
  -9  14  10  127.58    4.63
  -9  14  11    1.80    1.80
  -5  14 -11   -0.07    1.50
  -9  14  11    1.35    1.25
  -5  14 -12   69.76    2.94
  -9  14  12   74.42    3.20
  -9  14  13   24.61    1.91
  -9  14  14    7.66    1.20
  14  -9 -15    0.11    0.76
 -10  14 -15   11.98    1.12
  14  -4 -14   11.77    1.29
 -10  14 -14   10.71    1.34
  -4  14  13    4.46    1.12
 -10  -4  12   84.53    3.00
  -4  14  12   92.81    3.44
  -4  14  11   13.32    1.85
 -10  -4  11   12.92    1.48
 -10  14 -11   14.90    2.25
  -4  14  10   27.02    2.27
 -10  14 -10   24.86    2.52
 -10  -4   9   89.16    3.43
  -4  14   9   92.77    4.02
 -10  14  -9   90.49    4.20
 -10  -4   8   48.60    2.63
 -10  14  -8   49.74    3.23
  -4  14   8   47.99    2.87
 -10  -4   7   43.47    2.55
  -4  14   7   43.89    3.02
 -10  14  -7   42.32    3.03
  -4  14   7   41.82    2.86
 -10  -4   6  117.39    4.51
  -4  14   6  118.79    4.81
 -10  14  -6  114.21    4.86
  -4  14   6  118.67    4.80
 -10  -4   5   33.13    2.53
  -4  14   5   37.57    2.79
 -10  14  -5   32.28    2.82
  -4  14   5   32.16    2.68
 -10  14  -4    0.15    1.27
  -4  14   4    3.26    1.94
 -10  -4   4    1.51    1.76
 -10  14  -4    1.31    1.90
 -10  -4   3   33.00    2.68
  -4  14   3   40.24    2.78
 -10  14  -3   36.49    2.74
 -10  14  -3   36.20    2.34
  -4  14   2   49.07    2.97
 -10  14  -2   44.05    2.95
  -4  14   2   48.73    3.22
 -10  14  -2   43.17    2.73
  -4  14   1   26.05    2.26
 -10  -4   1   27.99    2.63
 -10  14  -1   25.44    2.34
 -10  14  -1   29.87    2.42
  -4  14   1   27.45    2.65
 -10  -4   0   47.53    2.95
  -4  14   0   51.66    2.85
  -4  14   0   52.39    3.21
 -10  14   0   49.45    3.14
 -10  14   1    2.48    1.97
 -10  14   1    4.54    1.47
 -10  -4  -1    4.30    1.84
  -4  14  -1    5.82    1.96
 -10  14   2   14.98    2.42
 -10  14   2   11.47    1.75
 -10  -4  -2   13.48    2.01
  -4  14  -2   13.68    2.04
 -10  -4  -3  106.55    4.16
 -10  14   3  101.08    4.28
 -10  14   3  110.29    4.64
 -10  14   4   31.65    2.92
 -10  -4  -4   34.55    2.34
 -10  14   4   33.79    2.63
 -10  14   5   23.32    2.44
 -10  -4  -5   20.56    1.82
 -10  -4  -6   61.11    2.80
 -10  14   6   59.47    3.41
 -10  14   6   63.29    3.55
 -10  -4  -7   29.86    1.88
 -10  14   7   33.09    2.65
 -10  14   7   35.46    2.68
 -10  14   8   18.73    2.25
 -10  14   8   17.61    2.36
 -10  14   9  152.50    5.52
 -10  14   9  152.47    5.32
 -10  14  10   17.29    1.86
 -10  14  11    3.93    1.29
 -10  14  12   56.83    2.80
 -10  14  12   48.91    2.19
 -10  14  13    7.74    1.47
 -10  14  14    4.27    1.05
  14 -10 -14    5.91    1.05
  14  -3 -13    7.52    1.20
 -11  14 -13   11.51    1.51
 -11  -3  12   28.16    1.60
 -11  14 -12   27.31    2.26
  -3  14  11   16.53    2.12
 -11  -3  11   15.02    1.53
 -11  14 -11   13.57    2.01
 -11  -3  10   46.36    2.13
  -3  14  10   49.82    2.76
 -11  14 -10   49.76    2.92
 -11  -3   9   42.37    2.21
  -3  14   9   41.47    2.67
 -11  14  -9   40.52    2.78
 -11  -3   8   47.08    2.50
  -3  14   8   39.48    2.81
 -11  14  -8   41.94    2.91
 -11  -3   7   67.88    3.23
 -11  14  -7   68.36    3.58
 -11  -3   6   86.65    3.78
  -3  14   6   94.28    4.18
 -11  14  -6   83.84    3.99
  -3  14   5    5.53    2.01
 -11  -3   5    1.74    1.79
 -11  14  -5    4.18    1.89
  -3  14   5    6.26    2.10
 -11  -3   4   41.66    2.89
  -3  14   4   38.00    2.81
 -11  14  -4   33.00    2.59
  -3  14   4   45.69    3.12
 -11  14  -3   20.27    1.93
  -3  14   3   21.79    2.28
 -11  -3   3   20.46    2.46
 -11  14  -3   20.97    2.17
  -3  14   2   72.16    3.44
 -11  14  -2   64.59    3.30
  -3  14   2   72.67    3.85
 -11  14  -2   69.47    3.28
 -11  14  -1    1.77    1.70
  -3  14   1    3.55    1.63
 -11  -3   1    2.46    1.98
 -11  14  -1    1.12    1.53
  -3  14   1    2.14    2.15
 -11  -3   0   33.10    2.65
 -11  14   0   34.48    2.65
 -11  14   1    6.11    2.02
 -11  -3  -1    7.13    1.85
 -11  14   2   13.58    2.32
 -11  14   2   16.59    1.84
 -11  -3  -2   15.65    2.08
 -11  -3  -3   65.30    3.20
 -11  14   3   64.07    3.25
 -11  14   3   70.36    3.67
 -11  -3  -4  229.76    7.04
 -11  14   4  220.44    7.30
 -11  14   4  234.00    7.63
 -11  -3  -5   57.46    2.75
 -11  14   5   60.94    3.25
 -11  -3  -6   47.42    2.37
 -11  14   6   44.97    2.94
 -11  14   6   50.89    3.07
 -11  14   7   10.77    2.12
 -11  14   7   14.40    2.10
 -11  14   8   62.72    3.39
 -11  14   8   60.77    3.19
 -11  14   9   53.57    3.08
 -11  14   9   49.62    2.76
 -11  14  10    2.90    1.46
 -11  14  10    5.47    1.86
 -11  14  11   23.59    1.71
 -11  14  12   24.18    2.01
 -11  14  12   21.35    1.38
 -11  14  13   12.21    1.41
 -11  14  14    0.43    0.86
 -12  14 -13   68.20    2.63
 -12  -2  12    6.04    1.00
  14  -2 -12    4.99    0.91
 -12  14 -12    7.62    1.41
 -12  -2  11   13.59    1.47
 -12  14 -11    9.54    1.64
 -12  -2  10   54.01    2.77
 -12  -2  10   50.07    2.17
 -12  14 -10   55.44    2.94
 -12  -2   9   35.70    1.99
 -12  14  -9   30.78    2.40
 -12  -2   8   22.18    1.90
 -12  14  -8   21.30    2.23
 -12  -2   7   60.48    3.04
 -12  14  -7   66.15    3.27
  -2  14   6   15.26    2.30
 -12  -2   6   15.80    2.03
 -12  14  -6   18.64    2.09
 -12  -2   5   20.53    2.22
 -12  14  -5   16.21    1.93
 -12  -2   4   76.31    3.65
 -12  14  -4   71.54    3.43
 -12  14  -3   36.02    2.36
 -12  14  -3   32.14    2.16
 -12  14  -2    7.84    1.69
 -12  14  -2    8.67    1.59
 -12  -2   1   43.96    2.90
 -12  14  -1   42.88    2.76
 -12  14   0   26.54    2.44
 -12  -2   0   28.08    2.44
 -12  14   1    1.82    1.82
 -12  -2  -1    1.62    1.76
 -12  -2  -2  105.99    4.27
 -12  14   2  104.74    4.08
 -12  14   2  115.33    4.60
 -12  -2  -3   48.49    2.72
 -12  14   3   49.55    2.73
 -12  14   3   50.61    3.07
 -12  -2  -4   65.94    3.02
 -12  14   4   62.45    3.21
 -12  14   4   62.97    3.56
 -12  -2  -5  128.53    4.48
 -12  14   5  134.77    4.95
 -12  14   6   23.55    2.45
 -12  14   6   22.71    2.34
 -12  -2  -6   17.71    1.58
 -12  14   7    4.23    1.93
 -12  14   7    4.75    1.90
 -12  14   8   92.66    4.01
 -12  14   8   90.76    3.85
 -12  14   9   -1.29    1.54
 -12  14   9    0.78    1.74
 -12  14  10    2.07    1.38
 -12  14  10    1.22    1.65
 -12  14  11   23.53    2.21
 -12  14  11   22.81    1.57
 -12  14  12    4.34    0.88
 -12  14  13    0.49    0.99
 -13  -1  12    1.89    0.76
 -13  14 -12    1.11    0.93
 -13  -1  11   26.66    1.67
 -13  14 -11   32.41    1.87
 -13  -1  10   15.46    1.22
 -13  -1  10   16.17    1.66
 -13  -1   9   13.35    1.39
 -13  -1   9   12.35    1.78
 -13  14  -9   11.99    1.71
 -13  -1   8    7.03    1.43
 -13  -1   8    7.46    1.75
 -13  14  -8    8.05    1.56
 -13  -1   7   39.35    2.37
 -13  14  -7   36.05    2.28
 -13  -1   6    2.99    1.54
 -13  14  -6    2.91    1.45
 -13  -1   5   39.79    2.61
 -13  14  -5   30.64    2.11
 -13  -1   4   27.86    2.41
 -13  14  -4   24.67    1.89
 -13  14  -3   43.22    2.36
 -13  -1   2   37.77    2.71
 -13  14  -2   35.96    2.30
 -13  -1   1   32.69    2.60
 -13  14  -1   38.00    2.45
 -13  14   0    9.08    1.85
 -13  -1   0    9.43    1.91
 -13  -1  -1   55.36    2.99
 -13  14   1   50.26    3.05
 -13  -1  -2   51.36    2.90
 -13  14   2   60.91    3.25
 -13  14   3   13.48    1.72
 -13  -1  -3   15.06    1.81
 -13  14   4   30.18    2.57
 -13  -1  -4   28.86    2.00
 -13  14   4   29.53    2.16
 -13  -1  -5   72.92    2.99
 -13  14   5   78.07    3.43
 -13  14   6    4.64    1.93
 -13  14   6    3.90    1.65
 -13  14   7   46.92    2.75
 -13  14   7   44.67    2.70
 -13  14   8   27.43    2.19
 -13  14   8   30.68    2.23
 -13  14   9    0.67    1.48
 -13  14   9    1.72    1.59
 -13  14  10   13.81    1.45
 -13  14  10   16.29    1.85
 -13  14  11    7.83    1.09
 -13  14  11    7.43    1.45
 -13  14  13    1.29    0.72
 -14   0  11   55.22    2.14
 -14   0  10    1.44    0.74
 -14   0  10    1.82    1.15
 -14  14 -10    0.92    0.88
 -14   0   9    6.66    1.29
 -14   0   9    9.31    1.53
 -14  14  -9    5.66    1.18
 -14   0   8   25.45    2.04
 -14   0   8   24.37    1.75
 -14  14  -8   21.51    1.51
 -14   0   7   20.13    1.87
 -14  14  -7   18.48    1.50
 -14   0   6    7.57    1.62
 -14   0   6    8.34    1.78
 -14   0   5   33.79    2.35
 -14   0   4    0.14    1.82
 -14   0   2   91.12    3.72
 -14  14  -2   84.47    3.43
 -14  14  -1    5.39    1.56
 -14   0   1    6.03    1.82
 -14  14   0   -0.30    1.52
 -14   0   0   -1.01    1.67
 -14   0  -1   98.58    3.85
 -14  14   1   93.21    3.94
 -14  14   2   27.74    2.37
 -14   0  -2   27.62    2.11
 -14  14   3   12.56    2.05
 -14  14   3    9.64    1.46
 -14   0  -3   12.42    1.57
 -14   0  -4   63.97    2.74
 -14  14   4   69.75    2.99
 -14  14   4   71.27    3.38
 -14  14   5    2.02    1.37
 -14   0  -5    3.28    1.07
 -14  14   6    1.68    1.38
 -14  14   7  136.52    4.73
 -14  14   7  138.91    4.86
 -14  14   8    0.36    1.42
 -14  14   8    2.94    1.47
 -14  14   9    1.16    1.25
 -14  14   9   -0.29    1.31
 -14  14  10   51.12    2.30
 -14  14  10   39.55    1.93
 -14  14  11    4.14    1.16
 -14  14  12   19.56    1.27
 -15   1  10    1.41    0.87
 -15   1   9    3.83    0.81
 -15   1   9    5.51    1.12
 -15   1   8   18.34    1.37
 -15   1   7   19.66    1.58
 -15   1   7   20.37    1.81
 -15   1   6    4.22    1.40
 -15   1   6    6.87    1.54
 -15   1   5   28.41    2.08
 -15   1   5   29.97    2.09
 -15   1   4   24.38    1.99
 -15   1   3   56.01    2.73
 -15   1   3   58.66    2.91
 -15   1   2   88.60    3.40
 -15   1   2   91.03    3.52
 -15  14  -1   14.17    1.56
 -15   1   1   15.35    1.83
 -15   1   1   16.62    1.61
 -15  14   0   22.80    1.91
 -15   1   0   19.63    1.64
 -15   1   0   22.87    1.97
 -15   1  -1   47.63    2.29
 -15   1  -1   55.05    2.59
 -15  14   1   53.81    2.72
 -15  14   2    4.63    1.54
 -15   1  -2    4.22    1.32
 -15  14   3   24.07    2.09
 -15   1  -3   21.97    1.63
 -15  14   4   18.47    2.14
 -15   1  -4   18.38    1.41
 -15  14   4   17.00    1.48
 -15  14   5    4.57    1.67
 -15  14   5    3.53    1.21
 -15  14   6   25.32    1.73
 -15  14   7   28.92    1.82
 -15  14   7   32.78    2.08
 -15  14   8    2.34    1.22
 -15  14   8    2.41    1.15
 -15  14   9   14.87    1.27
 -15  14   9   17.17    1.36
 -15  14  10   27.01    1.46
 -16   2   8    7.93    0.87
 -16   2   8    8.13    0.98
 -16   2   7   -0.69    0.87
 -16   2   7    0.13    0.92
 -16   2   6   19.88    1.49
 -16   2   6   15.26    1.41
 -16   2   5    3.41    1.28
 -16   2   5    3.15    1.27
 -16   2   4    1.21    1.15
 -16   2   3   34.00    1.92
 -16   2   3   36.32    2.11
 -16   2   2    9.91    1.52
 -16   2   2   11.21    1.32
 -16  14  -1    3.34    1.03
 -16   2   1    3.29    1.35
 -16   2   1    0.68    0.99
 -16   2   0   39.82    1.92
 -16   2   0   45.10    2.20
 -16  14   0   43.67    2.13
 -16  14   1    5.33    1.33
 -16   2  -1    4.28    1.16
 -16  14   2    2.24    1.33
 -16   2  -2   -0.09    1.01
 -16   2  -3   17.50    1.28
 -16  14   3   22.68    1.83
 -16  14   4    0.61    1.31
 -16  14   5    4.52    1.30
 -16  14   6   35.61    1.62
 -16  14   7    3.57    1.08
 -16  14   7    2.79    0.79
 -16  14   8    1.18    0.86
 -17   3   6   10.78    0.94
 -17   3   5    1.65    0.81
 -17   3   5    1.65    0.72
 -17   3   4    7.52    0.87
 -17   3   3   12.48    1.01
 -17   3   3   17.27    1.29
 -17   3   2    0.12    0.96
 -17   3   1    4.65    1.00
 -17   3   0   16.83    1.23
 -17  14   0   17.14    1.16
 -17  14   1    2.22    0.89
 -17   3  -1    1.14    0.76
 -17  14   2   13.31    1.18
 -17   3  -2   11.17    0.90
 -17  14   3    0.78    0.91
 -17  14   4    4.46    0.97
 -17  14   5   16.62    1.21
  -7  15  13    7.99    1.08
  -8  15 -13    5.94    1.15
  -7  15  12   31.64    1.91
  -8  15 -12   31.11    2.02
  -7  15  11   51.75    2.60
  -8  15 -11   48.47    2.59
  -7  15  11   46.03    2.18
  -8  15 -10   14.22    2.08
  -7  15  10   13.31    1.56
  -8  15  -9   34.75    2.63
  -7  15   9   39.69    2.37
  -8  -7   8   43.63    2.24
  -7  15   8   43.54    2.84
  -7  15   8   45.65    2.71
  -7  15   7   -0.34    1.88
  -8  -7   7    1.41    1.31
  -7  15   7    2.06    1.81
  -8  -7   6   38.19    2.35
  -7  15   6   37.82    2.75
  -7  15   6   36.56    2.77
  -8  -7   5   66.01    3.13
  -7  15   5   66.75    3.34
  -8  15  -5   59.14    3.61
  -7  15   5   65.11    3.57
  -7  15   4   36.99    2.63
  -8  15  -4   34.58    2.95
  -8  15  -4   34.83    2.22
  -7  15   3   28.66    2.32
  -8  15  -3   22.01    2.02
  -7  15   3   24.17    2.58
  -7  15   2   78.06    3.55
  -8  15  -2   82.17    3.65
  -7  15   2   80.77    3.89
  -7  15   1  153.29    5.45
  -7  15   1  168.61    5.98
  -8  15  -1  161.94    5.74
  -7  15   0  168.83    5.67
  -8  15   0  171.26    5.65
  -7  15   0  177.08    6.16
  -8  15   0  175.53    6.07
  -8  15   1  193.18    6.44
  -7  15  -1  210.12    6.81
  -8  15   1  203.63    6.84
  -8  15   2   41.93    2.62
  -7  15  -2   43.94    2.66
  -8  15   2   48.66    3.06
  -8  15   3    5.00    1.69
  -7  15  -3    6.05    1.62
  -8  15   3    4.40    2.08
  -8  15   4   70.02    3.44
  -7  15  -4   61.97    2.96
  -8  15   5   31.35    2.55
  -7  -8   6   52.08    2.64
  -8  15   6   52.83    3.14
  -7  15  -6   46.44    3.31
  -8  15   6   51.25    3.07
  -8  15   7   31.82    2.66
  -7  -8   7   36.01    2.11
  -7  15  -7   34.29    2.76
  -8  15   7   29.80    2.43
  -8  15   8   27.77    2.51
  -7  -8   8   25.32    1.69
  -7  15  -8   24.76    2.52
  -8  15   8   21.87    2.16
  -8  15   9   33.89    2.49
  -7  15  -9   34.27    2.55
  -8  15   9   32.22    2.27
  -7  15 -10   36.99    2.38
  -8  15  10   33.42    2.09
  -8  15  11   67.78    3.04
  -7  15 -11   69.31    3.06
  -8  15  11   64.58    2.64
  -8  15  12    3.73    1.31
  -7  15 -12    4.13    1.34
  -8  15  13   26.88    1.60
  15  -8 -14   12.23    1.13
  -6  15  13   10.64    1.09
  -9  15 -13   11.05    1.31
  -6  15  12   14.17    1.46
  -9  15 -12   15.31    1.64
  -6  15  11   30.92    2.09
  -9  15 -11   28.53    2.16
  -6  15  10    1.16    2.44
  -9  -6   9   24.23    1.61
  -6  15   9   27.36    2.03
  -9  -6   8   54.92    2.53
  -6  15   8   60.62    3.16
  -9  15  -8   52.91    3.19
  -6  15   8   50.64    2.86
  -6  15   7   20.53    2.32
  -9  -6   7   18.27    1.80
  -9  15  -7   18.25    2.46
  -6  15   7   21.75    2.24
  -9  -6   6   58.17    2.92
  -6  15   6   65.10    3.42
  -9  15  -6   61.54    3.46
  -6  15   6   62.85    3.28
  -9  -6   5   58.89    3.00
  -6  15   5   57.95    3.26
  -9  15  -5   60.12    3.45
  -6  15   5   61.56    3.42
  -9  -6   4   70.16    3.25
  -6  15   4   62.88    3.27
  -9  15  -4   58.78    3.51
  -9  15  -4   60.54    2.88
  -9  -6   3   54.67    3.05
  -6  15   3   50.24    2.98
  -9  15  -3   50.58    3.20
  -6  15   3   54.20    3.23
  -9  15  -3   49.30    2.70
  -6  15   2  107.06    4.24
  -6  15   2  104.48    4.53
  -9  15  -2  106.14    4.23
  -6  15   1   99.30    3.96
  -6  15   1   90.21    4.21
  -9  15  -1   95.63    4.09
  -6  15   0  140.02    4.97
  -6  15   0  146.45    5.41
  -9  15   0  142.73    5.33
  -9  15   1  124.13    4.50
  -6  15  -1  126.05    4.87
  -9  15   1  121.69    4.87
  -9  15   2   18.03    2.28
  -9  15   2   21.57    1.99
  -6  15  -2   17.04    2.13
  -9  15   3   42.42    2.68
  -6  15  -3   46.75    2.72
  -9  15   3   43.96    3.01
  -9  15   4   35.79    2.57
  -9  15   5    2.31    1.74
  -9  15   6    1.50    1.73
  -9  -6  -6    2.03    1.19
  -9  15   6    3.33    2.04
  -9  15   7   25.88    2.42
  -9  -6  -7   23.03    1.66
  -6  -9   7   25.05    1.79
  -9  15   7   21.76    2.29
  -6  -9   8   37.42    1.92
  -9  15   8   37.37    2.65
  -9  15   8   36.47    2.47
  -9  15   9    4.56    1.86
  -9  15   9    4.02    1.49
  -9  15  10   64.63    2.83
  -9  15  11   55.46    2.34
  -9  15  12   12.84    1.52
  -9  15  13   38.64    1.84
  15  -5 -13    9.92    1.14
 -10  15 -13   12.24    1.26
  -5  15  12   19.79    1.46
  -5  15  11    5.23    1.41
 -10  -5  11    4.55    0.97
  -5  15  10   11.21    1.73
 -10  15 -10   12.50    1.91
 -10  -5   9   37.09    1.95
 -10  15  -9   42.99    2.72
 -10  -5   8   19.31    1.70
 -10  15  -8   19.95    2.21
  -5  15   8   21.20    2.05
 -10  -5   7   33.57    2.18
  -5  15   7   31.04    2.56
 -10  15  -7   34.89    2.65
  -5  15   7   34.67    2.46
 -10  -5   6  107.00    4.09
  -5  15   6  104.10    4.36
 -10  15  -6  103.45    4.43
  -5  15   6  109.92    4.39
  -5  15   5   26.33    2.47
 -10  -5   5   30.11    2.34
 -10  15  -5   32.10    2.62
  -5  15   5   29.09    2.66
 -10  -5   4   51.72    2.88
  -5  15   4   52.02    3.01
 -10  15  -4   49.98    3.09
 -10  -5   3   88.70    3.76
  -5  15   3   78.01    3.68
 -10  15  -3   84.98    3.88
  -5  15   3   83.27    4.03
 -10  15  -3   81.24    3.46
  -5  15   2   59.75    3.06
  -5  15   2   56.34    3.46
 -10  15  -2   57.99    2.98
  -5  15   1   78.66    3.59
  -5  15   1   89.01    4.05
 -10  15  -1   87.89    3.78
 -10  -5   0   62.41    3.30
  -5  15   0   58.65    2.93
  -5  15   0   63.53    3.39
 -10  15   0   66.04    3.31
 -10  15   1   14.46    2.18
 -10  -5  -1   13.66    1.97
  -5  15  -1   12.26    2.03
 -10  15   2   24.82    2.49
 -10  -5  -2   30.99    2.29
 -10  15   2   24.80    2.03
 -10  -5  -3   74.86    3.42
 -10  15   3   83.99    3.60
 -10  15   3   82.31    3.91
 -10  15   4    6.50    2.09
 -10  15   4    5.80    1.70
 -10  -5  -4    7.96    1.67
 -10  15   5    7.06    1.91
 -10  -5  -5    7.01    1.48
 -10  15   6   14.91    2.14
 -10  15   6   18.19    2.16
 -10  -5  -6   17.08    1.61
 -10  15   7   19.13    2.17
 -10  15   7   12.66    2.11
 -10  -5  -7   17.58    1.53
 -10  15   8   43.68    2.69
 -10  15   8   34.55    2.47
 -10  15   9   21.73    2.20
 -10  15   9   20.19    1.87
 -10  15  10   32.70    2.32
 -10  15  10   31.05    2.02
 -10  15  11   22.13    1.58
 -10  15  12   32.60    1.95
 -10  15  13   24.52    1.48
 -11  15 -12    9.97    1.33
 -11  -4  11    4.73    1.00
 -11  15 -11    5.80    1.50
  -4  15  10   16.65    1.80
 -11  -4  10   16.85    1.51
 -11  15 -10   15.41    1.88
  -4  15   9   21.95    2.67
 -11  -4   9   16.84    1.43
 -11  15  -9   17.83    2.01
 -11  -4   8   23.09    1.72
 -11  15  -8   19.28    2.12
 -11  -4   7   58.37    2.82
  -4  15   7   65.44    3.21
 -11  15  -7   63.54    3.27
 -11  -4   6   81.98    3.54
  -4  15   6   90.72    3.81
 -11  15  -6   81.84    3.74
  -4  15   5   25.76    2.32
 -11  -4   5   22.00    2.16
 -11  15  -5   21.21    2.25
 -11  -4   4   32.19    2.44
  -4  15   4   39.88    2.76
 -11  15  -4   32.33    2.48
 -11  -4   3   85.31    3.77
  -4  15   3   83.68    3.74
 -11  15  -3   80.03    3.65
 -11  15  -3   79.00    3.35
  -4  15   2   27.99    2.29
  -4  15   2   31.01    2.63
 -11  15  -2   30.27    2.20
 -11  -4   1   73.88    3.54
 -11  15  -1   72.20    3.39
 -11  -4   0   33.85    2.64
 -11  15   0   34.47    2.49
 -11  15   1    2.17    1.72
 -11  -4  -1    1.38    1.69
 -11  15   2    8.33    2.05
 -11  15   2    6.57    1.45
 -11  -4  -2    7.39    1.82
 -11  -4  -3  101.21    3.97
 -11  15   3   95.25    3.92
 -11  15   3  106.00    4.35
 -11  -4  -4   78.91    3.35
 -11  15   4   80.01    3.55
 -11  15   4   83.85    3.84
 -11  15   5   10.70    1.93
 -11  -4  -5    8.94    1.52
 -11  15   6   26.85    2.28
 -11  -4  -6   27.59    1.81
 -11  15   6   29.15    2.51
 -11  15   7   15.29    2.02
 -11  15   7   16.92    2.05
 -11  15   8    4.16    1.65
 -11  15   8    4.07    1.74
 -11  15   9   26.28    2.23
 -11  15   9   24.29    2.00
 -11  15  10   20.53    1.97
 -11  15  10   19.77    1.62
 -11  15  11    6.31    1.03
 -11  15  13    9.14    1.01
 -12  15 -12    1.93    0.97
 -12  -3  11   11.96    1.08
 -12  15 -11   13.00    1.43
 -12  -3  10   27.19    1.69
 -12  15 -10   30.37    1.96
 -12  -3   9    6.89    1.19
 -12  -3   9    8.57    1.47
 -12  15  -9    6.70    1.54
 -12  -3   8   25.71    1.73
 -12  15  -8   24.96    2.35
 -12  -3   7   48.12    2.44
 -12  15  -7   48.42    2.66
 -12  -3   6   38.02    2.37
 -12  15  -6   33.72    2.36
 -12  -3   5   29.14    2.33
 -12  15  -5   33.84    2.32
 -12  -3   4   67.95    3.19
 -12  15  -4   61.60    3.02
 -12  -3   3   26.80    2.40
 -12  15  -3   24.04    1.83
 -12  15  -2   63.48    2.97
 -12  -3   1  123.77    4.57
 -12  15  -1  113.77    4.38
 -12  15   0   14.01    1.95
 -12  -3   0   17.57    2.07
 -12  15   1    8.32    1.88
 -12  -3  -1    9.40    1.83
 -12  -3  -2   64.19    3.09
 -12  15   2   62.46    3.32
 -12  15   3   12.66    2.11
 -12  15   3   12.75    1.62
 -12  -3  -3   15.20    1.81
 -12  -3  -4   52.66    2.56
 -12  15   4   52.37    2.75
 -12  15   4   53.90    3.11
 -12  -3  -5   57.14    2.57
 -12  15   5   57.76    2.90
 -12  15   6   15.87    1.89
 -12  -3  -6   12.52    1.34
 -12  15   7    4.37    1.64
 -12  15   7    4.21    1.66
 -12  15   8   23.87    2.34
 -12  15   8   26.18    2.13
 -12  15   9    2.95    1.36
 -12  15   9    4.10    1.54
 -12  15  10   14.01    1.60
 -12  15  10   13.56    1.36
 -12  15  11   12.39    1.36
 -12  15  11    9.38    1.01
 -13  15 -11   18.46    1.21
 -13  -2  10    5.77    1.10
 -13  15 -10    6.89    1.14
 -13  -2   9    7.46    1.11
 -13  -2   9    9.88    1.42
 -13  15  -9    9.64    1.33
 -13  -2   8   17.30    1.45
 -13  -2   8   18.33    1.72
 -13  15  -8   16.53    1.61
 -13  -2   7   34.05    2.36
 -13  15  -7   30.97    2.04
 -13  -2   6    6.95    1.57
 -13  15  -6    7.91    1.43
 -13  -2   5   35.11    2.27
 -13  15  -5   32.33    1.99
 -13  -2   4   58.16    2.99
 -13  -2   2   53.83    3.00
 -13  15  -2   54.67    2.61
 -13  -2   1  101.57    3.96
 -13  15  -1   88.03    3.63
 -13  15   0    9.71    1.77
 -13  -2   0    9.59    1.83
 -13  -2  -1   31.71    2.27
 -13  15   1   32.46    2.38
 -13  15   2   28.59    2.38
 -13  -2  -2   28.33    2.16
 -13  15   3   11.68    1.99
 -13  15   3   12.05    1.49
 -13  -2  -3   11.62    1.61
 -13  15   4   17.16    2.09
 -13  15   4   15.19    1.62
 -13  -2  -4   14.88    1.55
 -13  -2  -5   40.82    2.03
 -13  15   5   41.39    2.32
 -13  15   6   16.02    1.77
 -13  15   7    0.83    1.55
 -13  15   7    2.87    1.54
 -13  15   8   16.11    1.68
 -13  15   8   18.08    1.71
 -13  15   9   12.32    1.41
 -13  15   9   12.85    1.54
 -13  15  10    6.90    1.25
 -13  15  10    4.98    1.02
 -13  15  11   13.06    1.20
 -14  -1  10    0.25    0.74
 -14  -1   9    3.19    0.71
 -14  -1   9    2.80    1.05
 -14  -1   8   18.69    1.55
 -14  -1   8   19.29    1.34
 -14  15  -8   16.13    1.17
 -14  -1   7   18.85    1.54
 -14  -1   6    6.85    1.43
 -14  -1   5   27.23    2.01
 -14  -1   4   25.80    2.14
 -14  -1   2   84.65    3.49
 -14  15  -2   80.69    3.10
 -14  15  -1   13.32    1.58
 -14  -1   1   18.52    1.89
 -14  15   0   21.78    1.87
 -14  -1   0   23.56    1.93
 -14  -1  -1   51.01    2.61
 -14  15   1   60.07    2.80
 -14  15   2    2.56    1.57
 -14  -1  -2    5.19    1.34
 -14  15   3   22.28    2.07
 -14  -1  -3   18.66    1.61
 -14  15   4   16.74    2.03
 -14  -1  -4   17.27    1.41
 -14  15   4   15.28    1.42
 -14  15   5    5.01    1.61
 -14  15   5    4.23    1.23
 -14  15   6   21.79    1.69
 -14  15   7   27.95    1.82
 -14  15   7   31.05    2.03
 -14  15   8    4.74    1.26
 -14  15   8    3.37    1.15
 -14  15   9   15.91    1.33
 -14  15   9   14.83    1.24
 -14  15  10   26.08    1.44
 -15   0   9    2.91    0.75
 -15   0   8   24.37    1.27
 -15   0   7    0.78    0.90
 -15   0   6   18.97    1.59
 -15   0   6   16.56    1.41
 -15   0   5   33.17    1.96
 -15   0   5   32.93    1.93
 -15   0   4   43.53    2.28
 -15   0   3  112.26    3.90
 -15   0   2   71.66    2.89
 -15   0   2   71.51    2.94
 -15  15  -1   10.61    1.30
 -15   0   1   13.88    1.64
 -15   0   1   12.23    1.49
 -15   0   0   18.26    1.66
 -15   0   0   16.37    2.40
 -15  15   0   19.82    1.67
 -15   0  -1   26.45    1.64
 -15   0  -1   29.52    1.83
 -15  15   1   29.37    1.95
 -15  15   2    2.81    1.40
 -15   0  -2    2.30    1.17
 -15  15   3    6.69    1.50
 -15   0  -3    5.90    1.07
 -15  15   4   11.03    1.56
 -15   0  -4   10.39    1.05
 -15  15   5   12.49    1.56
 -15  15   6    0.16    0.83
 -15  15   7   18.41    1.29
 -15  15   7   24.68    1.59
 -15  15   8    9.38    1.04
 -15  15   8    8.59    0.94
 -16   1   7    1.29    0.69
 -16   1   6   23.58    1.38
 -16   1   6   21.56    1.26
 -16   1   5    4.96    1.04
 -16   1   5    5.85    1.00
 -16   1   4   24.45    1.48
 -16   1   3   44.67    2.03
 -16   1   3   53.82    2.22
 -16   1   2    9.30    1.25
 -16   1   2    6.14    1.04
 -16   1   1   19.39    1.27
 -16   1   1   20.48    1.50
 -16   1   0   25.10    1.58
 -16  15   0   20.88    1.36
 -16  15   1    5.19    1.06
 -16   1  -1    2.66    0.98
 -16  15   2    3.74    1.12
 -16   1  -2    5.63    0.93
 -16  15   3    5.56    1.15
 -16   1  -3    4.16    0.73
 -16  15   4    1.17    1.07
 -16  15   5   11.05    1.22
 -16  15   7    4.80    0.82
 -17   2   3   14.44    1.02
 -17   2   2    2.49    0.74
 -17   2   1    9.24    0.88
  -8  16   0   87.65    3.84
  -8  16   1   24.25    1.84
  -8  16  -1   24.91    2.14
  -8  16   1   20.46    2.27
  -8  16   2    3.15    1.40
  -8  16  -2    2.02    1.51
  -8  16   2    2.44    1.88
  -8  16   3   40.72    2.43
  -8  16  -3   42.10    2.40
  -8  16   3   43.62    2.88
  -8  16   4    8.33    1.71
  -8  -8   4    7.01    1.62
  -8  16   5    6.46    1.67
  -8  -8   5    3.58    1.47
  -8  -8   6   36.01    2.09
  -8  16   6   34.30    2.33
  -8  16   6   35.34    2.47
  -8  16   7   -0.42    1.49
  -8  -8   7    0.67    1.08
  -8  -8  -7    1.28    0.97
  -8  16   7   -0.55    1.56
  -8  16   8    3.67    1.53
  -8  -8   8    3.64    0.96
  -8  16   8    3.53    1.66
  -8  16   9   43.92    2.36
  -8  16   9   44.58    2.23
  -8  16  10    2.67    0.98
  -8  16  12   19.11    1.21
  -7  16  12   13.82    1.06
  -7  16  11   12.43    1.25
  -7  16   9   36.90    2.22
  -7  16   9   35.63    2.01
  -7  16   8    0.58    1.47
  -9  -7   8    1.68    1.04
  -7  16   8    0.12    1.39
  -7  16   7   21.56    1.99
  -9  -7   7   23.03    1.69
  -7  16   7   20.61    2.00
  -9  -7   6   32.62    2.03
  -7  16   6   32.14    2.34
  -7  16   6   34.23    2.37
  -7  16   5    8.27    1.77
  -9  -7   5    8.56    1.59
  -7  16   5    6.43    1.94
  -9  -7   4   30.89    2.17
  -7  16   4   29.98    2.20
  -9  -7   3   62.21    3.00
  -7  16   3   59.06    2.93
  -9  16  -3   59.67    2.78
  -7  16   3   59.07    3.32
  -7  16   2    1.98    1.40
  -9  -7   2   -0.29    1.70
  -7  16   2    0.08    1.83
  -9  16  -2    0.51    1.45
  -7  16   1   20.43    1.81
  -7  16   1   26.21    2.36
  -9  16  -1   24.79    2.21
  -7  16   0   45.05    2.77
  -9  16   0   44.87    2.71
  -7  16  -1   10.29    1.84
  -9  16   1    9.79    2.00
  -9  16   2   32.62    2.13
  -7  16  -2   38.73    2.40
  -9  16   2   33.10    2.56
  -9  16   3   14.46    1.69
  -9  -7  -3   12.76    1.71
  -9  16   3   14.94    2.17
  -9  16   4   13.50    1.76
  -9  -7  -4   10.47    1.59
  -9  16   4   12.61    2.11
  -9  16   5    9.32    1.72
  -9  -7  -5   11.65    1.48
  -7  -9   5    7.89    1.50
  -9  16   6   16.81    1.90
  -9  -7  -6   16.19    1.49
  -7  -9   6   17.27    1.59
  -9  16   6   18.19    1.96
  -9  16   7    4.06    1.62
  -7  -9   7    4.56    1.09
  -9  -7  -7    3.75    1.01
  -9  16   7    4.23    1.66
  -9  16   8   18.43    1.89
  -9  16   8   18.48    1.82
  -9  16   9   39.68    2.29
  -9  16   9   36.92    2.09
  -9  16  10    7.85    1.44
  -9  16  10    7.06    1.13
  -9  16  12   14.44    1.10
  -6  16  11    0.16    0.87
 -10  -6  10   15.30    1.07
 -10  16  -9   13.95    1.72
  -6  16   8   12.08    1.64
 -10  -6   8   13.45    1.28
 -10  16  -8   14.33    1.80
 -10  -6   7   47.38    2.31
  -6  16   7   49.53    2.68
 -10  16  -7   44.94    2.88
  -6  16   6   14.57    1.92
 -10  -6   6   14.12    1.65
  -6  16   6   16.70    1.97
  -6  16   5    3.45    1.60
 -10  -6   5    5.14    1.57
  -6  16   5    3.48    1.78
 -10  -6   4   83.41    3.53
  -6  16   4   86.30    3.55
  -6  16   3   10.95    1.71
 -10  -6   3    8.18    1.79
  -6  16   3   11.83    2.13
 -10  16  -3    8.81    1.45
  -6  16   2    8.89    1.57
 -10  -6   2    7.99    1.95
  -6  16   2    7.38    2.00
 -10  16  -2   10.56    1.67
  -6  16   1   20.47    2.29
 -10  16  -1   23.17    2.01
 -10  -6   0    1.07    1.70
  -6  16   0    0.40    1.66
 -10  16   0    3.28    1.67
 -10  -6  -1    8.25    1.76
 -10  16   1    8.95    1.88
 -10  -6  -2   56.03    2.84
 -10  16   2   51.15    2.52
 -10  16   2   56.43    3.10
 -10  16   3   17.31    1.74
 -10  -6  -3   19.22    1.82
 -10  16   3   14.07    2.08
 -10  16   4    5.14    1.42
 -10  -6  -4    3.79    1.42
 -10  16   4    2.97    1.94
 -10  16   5   20.78    1.91
 -10  -6  -5   19.28    1.65
 -10  16   6    4.08    1.55
 -10  -6  -6    2.95    1.10
  -6 -10   6    2.16    1.14
 -10  16   6    2.93    1.79
 -10  16   7    5.34    1.89
  -6 -10   7    4.20    1.05
 -10  16   7    3.57    1.84
 -10  16   8   44.44    2.44
 -10  16   8   45.46    2.44
 -10  16   9    1.78    1.36
 -10  16   9    3.27    1.21
 -10  16  10   14.00    1.46
 -10  16  10   12.98    1.21
 -11  -5  10   10.49    0.96
 -11  16 -10   13.33    1.39
 -11  16  -9    4.86    1.33
 -11  -5   8   37.50    1.85
  -5  16   8   40.62    2.24
 -11  16  -8   38.83    2.30
 -11  -5   7   44.48    2.21
  -5  16   7   45.03    2.46
 -11  16  -7   44.53    2.52
  -5  16   6   -0.46    1.52
 -11  -5   6    1.10    1.34
 -11  16  -6    1.82    1.56
 -11  -5   5   39.23    2.34
  -5  16   5   40.21    2.43
 -11  -5   4   41.35    2.45
  -5  16   4   35.15    2.38
 -11  -5   3    5.93    1.80
 -11  16  -3    8.30    1.38
 -11  16  -2   20.23    1.77
 -11  -5   1    6.77    1.86
 -11  16  -1    6.49    1.55
 -11  -5   0    3.01    1.74
 -11  16   0    2.60    1.61
 -11  -5  -1    7.39    1.67
 -11  16   1    7.92    1.84
 -11  -5  -2   25.56    2.07
 -11  16   2   25.63    2.31
 -11  -5  -3   43.66    2.38
 -11  16   3   43.33    2.27
 -11  16   3   42.32    2.74
 -11  -5  -4   42.85    2.25
 -11  16   4   39.36    2.26
 -11  16   4   40.80    2.60
 -11  16   5    5.43    1.44
 -11  -5  -5    5.68    1.26
 -11  16   6    7.70    1.51
 -11  -5  -6   10.03    1.18
 -11  16   6   11.22    2.74
  -5 -11   7   23.90    1.41
 -11  16   7   26.96    1.99
 -11  16   7   24.75    2.01
 -11  16   8   13.66    1.67
 -11  16   8   14.49    1.64
 -11  16   9    3.89    1.31
 -11  16   9    4.31    1.18
 -11  16  10    8.47    1.27
 -11  16  10    6.69    0.97
 -11  16  11   17.10    1.26
 -12  16 -10    9.34    1.08
 -12  -4   9   10.43    1.17
 -12  16  -9   10.52    1.28
 -12  -4   8   36.26    1.71
 -12  16  -8   33.60    1.96
 -12  16  -7    9.59    1.50
 -12  -4   6   12.27    1.52
 -12  -4   5   52.53    2.63
 -12  -4   4   -0.51    1.46
 -12  -4   3    2.76    1.67
 -12  16  -2   24.39    1.81
 -12  -4   1    6.07    1.77
 -12  16  -1    7.13    1.47
 -12  16   0    1.44    1.43
 -12  -4   0    2.40    1.64
 -12  -4  -1   27.24    2.10
 -12  16   1   28.17    2.17
 -12  16   2   20.23    2.04
 -12  -4  -2   17.13    1.81
 -12  16   3    4.71    1.76
 -12  -4  -3    4.93    1.42
 -12  -4  -4   59.41    2.59
 -12  16   4   58.22    2.59
 -12  16   4   59.39    2.93
 -12  16   5   15.84    1.59
 -12  -4  -5   15.66    1.40
 -12  16   6    4.00    1.45
 -12  16   7   39.89    2.17
 -12  16   7   40.47    2.37
 -12  16   8    3.35    1.25
 -12  16   8    2.73    1.28
 -12  16   9    0.90    1.08
 -12  16   9    0.44    0.98
 -12  16  10   10.52    1.15
 -12  16  10    7.85    0.93
 -13  -3   9   15.83    1.15
 -13  -3   8   12.97    1.08
 -13  -3   8   15.30    1.34
 -13  -3   7    1.34    1.00
 -13  -3   6   23.35    1.66
 -13  -3   5   29.81    1.91
 -13  -3   4    8.99    1.55
 -13  16  -2   18.10    1.48
 -13  -3   1   26.91    2.11
 -13  16  -1   25.26    1.82
 -13  16   0   19.13    1.77
 -13  -3   0   19.11    1.81
 -13  16   1   14.90    1.77
 -13  -3  -1   13.16    1.72
 -13  16   2    6.25    1.61
 -13  -3  -2    5.76    1.43
 -13  16   3    2.40    1.51
 -13  -3  -3    4.54    1.34
 -13  -3  -4   32.57    2.10
 -13  16   4   32.28    2.25
 -13  16   5    3.68    1.14
 -13  -3  -5    4.22    0.99
 -13  16   6   24.63    1.64
 -13  16   7   11.13    1.44
 -13  16   7   12.73    1.32
 -13  16   8    5.32    1.07
 -13  16   8    5.15    1.17
 -13  16   9    7.35    0.98
 -13  16   9    6.15    0.93
 -14  -2   8    8.76    1.04
 -14  -2   7    0.32    0.79
 -14  -2   7    0.73    1.00
 -14  -2   6   20.85    1.44
 -14  -2   5    3.21    1.21
 -14  -2   5    4.06    1.20
 -14  -2   4   -0.45    1.20
 -14  -2   2    9.49    1.58
 -14  -2   1    2.62    1.33
 -14  16  -1    2.70    1.09
 -14  -2   0   49.11    2.37
 -14  16   0   40.35    2.14
 -14  16   1    6.29    1.37
 -14  -2  -1    3.71    1.27
 -14  16   2    1.92    1.30
 -14  -2  -2    2.50    1.13
 -14  16   3   19.86    1.71
 -14  -2  -3   19.73    1.45
 -14  16   4    2.82    1.35
 -14  -2  -4    0.77    0.89
 -14  16   5    4.26    1.35
 -14  16   6   36.18    1.64
 -14  16   7    3.04    1.03
 -14  16   7    2.97    0.84
 -14  16   8    1.92    0.86
 -15  -1   6   21.39    1.36
 -15  -1   6   21.11    1.23
 -15  -1   5    4.73    0.99
 -15  -1   5    8.49    1.16
 -15  -1   4   34.19    1.77
 -15  -1   4   34.48    1.80
 -15  -1   3   47.64    2.12
 -15  -1   2    7.85    1.21
 -15  -1   2    8.45    1.17
 -15  -1   1   21.10    1.42
 -15  -1   1   22.21    1.59
 -15  -1   0   22.32    1.36
 -15  -1   0   23.94    1.60
 -15  16   0   23.34    1.42
 -15  16   1    3.72    1.06
 -15  -1  -1    4.08    1.05
 -15  -1  -1    3.84    0.81
 -15  16   2    6.40    1.16
 -15  -1  -2    6.01    0.99
 -15  16   3    5.46    1.18
 -15  -1  -3    5.62    0.84
 -15  16   4    0.86    1.06
 -15  16   5   10.52    1.20
 -15  16   7    4.31    0.77
 -16   0   3    6.96    0.94
 -16   0   2    3.09    0.88
 -16   0   1   37.81    1.67
 -16   0   0    4.59    0.85
 -16   0  -1    1.48    0.69
 -16  16   2    6.41    0.85
 -16  16   3    0.07    0.73
  -8  17  10   17.52    1.12
  -8  17   9   13.90    1.19
  -8  17   8    2.93    1.06
  -8  17   7    9.67    1.32
  -9  -8   7    5.53    0.95
  -8  17   7    9.37    1.39
  -8  17   6    3.09    1.26
  -9  -8   6    0.35    1.03
  -8  -9  -6    3.00    1.02
  -8  17   6    1.76    1.36
  -8  17   5   15.19    1.56
  -9  -8   5   16.79    1.54
  -8  -9  -5   16.83    1.44
  -8  17   4    0.70    1.21
  -9  -8   4   -0.05    1.31
  -8  -9  -4    0.98    1.22
  -8  17   4    1.03    1.58
  -9  -8   3   40.17    2.25
  -8  17   3   33.47    1.93
  -8  17   3   36.61    2.41
  -9  -8   2   16.94    1.81
  -9  17  -2   13.19    1.48
  -8  17   2   17.81    1.96
  -8  17   1    8.49    1.77
  -9  17  -1    8.00    1.48
  -9  -8   0   54.61    2.69
  -8  17   0   51.00    2.68
  -9  17   0   51.85    2.66
  -9  -8  -1   23.44    2.02
  -8  -9   1   22.38    2.27
  -8  17  -1   22.52    1.85
  -9  17   1   21.72    2.01
  -9  -8  -2   31.64    2.10
  -8  -9   2   28.09    2.10
  -9  17   2   27.52    2.19
  -9  -8  -3   18.69    1.71
  -8  -9   3   18.54    1.78
  -9  17   3   17.81    1.49
  -9  17   3   15.16    1.85
  -9  17   4   14.08    2.06
  -8  -9   4   13.61    1.52
  -9  -8  -4   13.64    1.47
  -9  17   4   15.35    1.84
  -9  17   5    6.07    1.26
  -8  -9   5    5.37    1.25
  -9  -8  -5    5.27    1.15
  -9  17   6    3.74    1.23
  -8  -9   6    3.32    1.09
  -9  -8  -6    3.26    0.93
  -9  17   6    2.79    1.43
  -9  17   7    5.45    1.21
  -8  -9   7    3.48    0.86
  -9  17   7    6.42    1.30
  -9  17   8    3.64    1.09
  -9  17   8    1.46    1.01
  -9  17   9   17.09    1.25
  -7  17   8   10.82    1.22
  -7  17   7    9.16    1.25
 -10  -7   7    7.27    1.00
  -7 -10  -7    6.99    0.82
  -7  17   6    4.05    1.22
 -10  -7   6    1.81    1.07
  -7 -10  -6    2.22    0.93
  -7  17   5   17.32    1.58
 -10  -7   5   20.56    1.66
  -7  17   4   14.06    1.48
 -10  -7   4   18.50    1.68
 -10  -7   3   33.99    2.17
  -7  17   3   34.81    2.30
 -10  -7   2    9.39    1.73
  -7  17   2   11.67    1.80
 -10  17  -2    9.72    1.36
 -10  17  -1    2.24    1.30
 -10  -7   0   24.86    2.07
 -10  17   0   21.14    1.85
 -10  -7  -1   24.41    1.93
 -10  17   1   19.57    1.94
 -10  -7  -2   67.20    2.84
 -10  17   2   60.63    2.97
 -10  17   3    2.64    1.02
 -10  -7  -3    3.90    1.31
  -7 -10   3    4.32    1.41
 -10  17   3    3.65    1.61
 -10  -7  -4   22.74    1.66
  -7 -10   4   20.85    1.60
 -10  17   4   19.83    1.53
 -10  17   4   19.66    1.94
 -10  17   5    2.22    1.14
 -10  -7  -5    3.39    1.07
 -10  17   6    3.81    1.18
 -10  -7  -6    2.96    0.93
  -7 -10   6    3.86    1.01
 -10  17   6    4.34    1.40
 -10  17   7    5.02    1.13
 -10  17   7    2.65    1.26
 -10  17   8   11.15    1.24
 -10  17   8    8.93    1.18
 -10  17   9   10.30    1.02
 -10  17   9    9.06    0.94
 -11  -6   7    4.02    0.83
  -6 -11  -7    5.94    0.77
 -11  -6   6   17.12    1.37
 -11  -6   5   21.81    1.62
 -11  -6   4   25.06    1.83
 -11  -6   3    7.92    1.52
 -11  17  -2    2.69    1.13
 -11  17  -1    8.68    1.43
 -11  -6   0    6.91    1.56
 -11  17   0    6.69    1.53
 -11  -6  -1    2.79    1.38
 -11  17   1    3.26    1.46
 -11  -6  -2   30.21    1.94
 -11  17   2   24.22    1.95
 -11  -6  -3   18.99    1.63
 -11  17   3   19.22    1.89
 -11  17   4    3.19    0.95
 -11  -6  -4    5.77    1.16
  -6 -11   4    3.06    1.12
 -11  17   4    3.18    1.56
 -11  17   5    6.64    1.16
 -11  -6  -5    4.59    1.04
  -6 -11   5    4.20    1.02
 -11  17   6    3.64    1.03
  -6 -11   6    3.31    0.86
 -11  17   6    4.18    1.33
 -11  17   7    7.60    1.12
 -11  17   7    7.96    1.27
 -11  17   8    8.05    1.01
 -11  17   8    8.62    1.11
 -11  17   9   13.51    1.03
 -12  -5   8    5.45    0.82
 -12  -5   7    4.76    0.83
 -12  -5   6   23.99    1.44
 -12  -5   5   27.10    1.66
 -12  -5   4    3.26    1.25
 -12  -5   3    4.45    1.39
 -12  -5   1    7.93    1.55
 -12  17  -1    7.63    1.26
 -12  -5   0    6.28    1.45
 -12  17   0    6.54    1.31
 -12  -5  -1   20.81    1.68
 -12  17   1   18.62    1.67
 -12  -5  -2    1.21    1.28
 -12  17   2    2.29    1.39
 -12  -5  -3   35.67    1.90
 -12  17   3   35.75    2.16
 -12  -5  -4    5.37    1.05
 -12  17   4    8.31    1.44
 -12  17   5    4.39    0.89
 -12  -5  -5    4.37    0.83
  -5 -12   5    5.84    0.94
 -12  17   5    3.94    1.37
 -12  17   6    4.72    0.93
 -12  17   7   18.88    1.24
 -12  17   7   20.46    1.40
 -12  17   8    5.11    0.93
 -13  -4   7   10.08    0.98
 -13  -4   6   21.14    1.27
 -13  -4   5   18.00    1.31
 -13  -4   4    6.22    1.18
 -13  -4   3    7.38    1.32
 -13  -4   1    2.18    1.25
 -13  17  -1    3.06    0.95
 -13  -4   0    3.28    1.23
 -13  17   0    3.56    1.07
 -13  -4  -1   10.61    1.36
 -13  17   1   10.31    1.34
 -13  -4  -2    2.69    1.10
 -13  17   2    1.52    1.18
 -13  -4  -3   21.08    1.37
 -13  17   3   19.94    1.63
 -13  -4  -4    6.69    0.88
 -13  17   4    7.86    1.26
  -4 -13   5    8.86    0.81
 -13  17   5    9.09    1.28
 -13  17   7    7.22    0.93
 -14  -3   5    1.89    0.78
 -14  -3   5    2.48    0.93
 -14  -3   4    8.54    1.04
 -14  -3   4   10.35    1.12
 -14  -3   2   -0.67    1.03
 -14  -3   1    4.21    1.09
 -14  -3   0   19.60    1.37
 -14  17   0   14.73    1.12
 -14  -3  -1    0.86    0.91
 -14  17   1    0.20    0.88
 -14  -3  -2   14.13    1.15
 -14  17   2   14.79    1.29
 -14  -3  -3    2.16    0.74
 -14  17   3    2.75    1.02
 -14  17   4    5.91    1.04
 -14  17   5   12.37    1.12
 -15  -2   2    5.09    0.85
 -15  -2   1    9.91    0.98
 -15  -2   0    8.84    0.91
  -9  -9   0    6.23    1.28
  -9  -9  -1   24.30    1.59
  -9  -9   2    5.66    1.23
  -9  -9  -2    6.38    1.15
  -9  -9   3    7.22    1.14
  -9  -9  -3   11.68    1.17
  -9  -9   4    2.42    0.92
  -9  -9  -4    2.17    0.84
  -9  -9   5    3.61    0.76
 -10  -8   5    4.77    0.81
 -10  -8   4   -1.13    0.85
  -8 -10  -4    0.63    0.78
 -10  -8   3    1.57    1.03
  -8 -10  -3    2.78    0.96
 -10  -8   2   13.82    1.38
  -8 -10  -2   15.57    1.34
  -8 -10  -1    0.31    1.07
 -10  -8   0    8.92    1.26
 -10  -8  -1   38.47    1.95
 -10  18   1   36.26    1.92
 -10  -8  -2    5.25    1.12
  -8 -10   2    5.24    1.12
 -10  18   2    5.47    1.17
 -10  -8  -3    2.20    0.95
  -8 -10   3    3.60    1.01
 -10  18   3    0.83    1.04
 -10  -8  -4    9.69    0.97
  -8 -10   4   10.65    1.04
 -10  18   6    2.17    0.86
 -11  -7   5    3.02    0.74
 -11  -7   4    0.69    0.86
  -7 -11  -4    0.70    0.77
 -11  -7   3    3.39    1.03
  -7 -11  -3    2.06    0.93
 -11  -7   2    6.76    1.22
  -7 -11  -2    6.79    1.15
  -7 -11  -1    4.50    1.14
 -11  -7   0    7.83    1.20
 -11  18   0    7.86    1.01
 -11  -7  -1    8.75    1.20
  -7 -11   1   11.17    1.26
 -11  18   1    9.05    1.16
 -11  -7  -2    2.57    0.98
  -7 -11   2    3.41    1.04
 -11  18   2    3.21    1.08
  -7 -11   3   14.75    1.14
 -11  -7  -3   13.28    1.13
 -11  18   3   14.02    1.31
  -7 -11   4    5.70    0.83
 -11  18   4    5.49    1.11
 -11  18   5    6.30    1.04
 -11  18   6    3.64    0.88
 -12  -6   4    0.82    0.74
  -6 -12  -4    0.15    0.72
 -12  -6   3    3.37    0.95
 -12  -6   1    3.11    1.00
 -12  -6   0    6.27    1.08
 -12  18   0    5.13    0.88
 -12  -6  -1    0.46    0.90
  -6 -12   1    2.13    0.95
 -12  18   1    1.32    0.87
 -12  -6  -2    0.25    0.79
  -6 -12   2    1.99    0.82
 -12  18   2    0.20    0.88
 -12  -6  -3   28.24    1.34
  -6 -12   3   27.16    1.36
 -12  18   3   28.26    1.52
 -12  18   4    3.99    0.86
 -12  18   5    6.85    0.89
 -13  -5   3    3.40    0.81
 -13  -5   1    3.24    0.89
 -13  -5   0    0.71    0.74
 -13  -5  -1    3.92    0.83
  -5 -13   2    1.43    0.68
   0   0   0    0.00    0.00


TITL NUM-14 in P3(1)21
REM P3(1)21 (#152 in standard setting)
CELL 1.54184  15.117356  15.117356  18.851987  90.0000  90.0000 120.0000
ZERR   16.00   0.000126   0.000126   0.000165   0.0000   0.0000   0.0000
LATT -1
SYMM -y, x-y, z+1/3
SYMM -x+y,-x, z+2/3
SYMM  y, x,-z
SYMM  x-y,-y,-z+2/3
SYMM -x,-x+y,-z+1/3
SFAC C H N O
UNIT 176.00 160.00 16.00 16.00
TREF
HKLF 4
END
;
_shelx_hkl_checksum                4464
_shelx_fab_file
;
-15 -2 0 0.7079 0.1451
-15 -2 1 1.1603 0.7357
-15 -2 2 -1.1230 0.7056
-15 -1 -7 -0.5136 -0.1352
-15 -1 -5 -0.1960 0.3791
-15 -1 -4 -0.8314 0.9477
-15 -1 -3 0.6828 0.5876
-15 -1 -2 -0.8559 1.3193
-15 -1 -1 0.9111 -0.3429
-15 -1 0 -0.7936 1.1611
-15 -1 1 -1.9490 0.4954
-15 -1 2 0.2643 -0.1487
-15 -1 3 -0.0856 0.4186
-15 -1 4 -0.0891 -0.2670
-15 -1 5 0.2634 -0.3509
-15 -1 6 -0.2439 0.2792
-14 -3 -5 -0.3675 0.0760
-14 -3 -4 0.1986 0.6814
-14 -3 -3 -0.8964 0.0066
-14 -3 -2 -1.3842 -1.6092
-14 -3 -1 -0.2202 -0.4465
-14 -3 0 0.7691 0.1621
-14 -3 1 0.1400 -0.5572
-14 -3 2 0.7079 0.2424
-14 -3 4 -0.1227 0.5308
-14 -3 5 0.6667 0.5232
-14 -2 -8 -0.6810 0.7351
-14 -2 -7 1.4353 1.1227
-14 -2 -6 0.4736 -0.0679
-14 -2 -5 1.1393 0.0154
-14 -2 -4 -0.5906 -0.9869
-14 -2 -3 0.6235 0.0265
-14 -2 -2 0.1888 -0.3060
-14 -2 -1 1.2915 1.2289
-14 -2 0 0.4164 0.6633
-14 -2 1 -0.1181 -0.1165
-14 -2 2 0.5045 -0.6229
-14 -2 4 0.8754 1.7342
-14 -2 5 0.4063 -0.8898
-14 -2 6 0.5935 -0.4088
-14 -2 7 0.8561 -0.5972
-14 -2 8 0.7942 1.0216
-14 -1 -10 -0.4163 0.7517
-14 -1 -9 0.1927 -0.0361
-14 -1 -8 0.3630 0.9484
-14 -1 -7 -0.1622 -0.0341
-14 -1 -6 -2.2197 0.6418
-14 -1 -5 -0.5878 0.4059
-14 -1 -4 -0.8435 -0.1591
-14 -1 -3 0.1227 0.8426
-14 -1 -2 0.9092 1.6404
-14 -1 -1 0.4687 0.2013
-14 -1 0 -0.4401 0.8331
-14 -1 1 -0.1213 0.7829
-14 -1 2 0.3686 0.6261
-14 -1 4 0.4186 -0.2414
-14 -1 5 0.2589 -0.5306
-14 -1 6 0.0319 -0.0613
-14 -1 7 0.5553 0.2484
-14 -1 8 0.4922 -0.0245
-14 -1 9 0.7013 -0.2194
-14 -1 10 -0.1348 -1.3197
-13 -5 -2 0.0972 -0.1041
-13 -5 -1 0.0803 0.9479
-13 -5 0 -0.1808 -0.3876
-13 -5 1 -0.5098 -0.6435
-13 -5 3 0.0026 0.1965
-13 -4 -7 1.0431 0.1465
-13 -4 -5 0.0301 0.1088
-13 -4 -4 -0.4114 0.1684
-13 -4 -3 0.6497 1.0064
-13 -4 -2 -0.2733 1.1745
-13 -4 -1 -0.4818 -0.0147
-13 -4 0 -1.5150 0.3103
-13 -4 1 0.0443 0.1156
-13 -4 3 -0.1980 0.2368
-13 -4 4 0.3541 0.2057
-13 -4 5 0.0025 0.9665
-13 -4 6 0.1485 0.2741
-13 -4 7 -0.6534 0.6622
-13 -3 -9 -0.3278 -0.2976
-13 -3 -8 -0.8275 -1.8947
-13 -3 -7 -1.4428 0.9863
-13 -3 -6 -0.7198 0.8573
-13 -3 -5 0.1496 -0.0290
-13 -3 -4 0.1154 -0.6635
-13 -3 -3 -0.3232 0.1214
-13 -3 -2 -0.0009 -0.2763
-13 -3 -1 -0.3554 -0.0575
-13 -3 0 0.2657 -0.1144
-13 -3 1 0.4365 -0.0918
-13 -3 2 0.3390 1.4836
-13 -3 4 -0.4000 0.6264
-13 -3 5 -0.4213 0.2723
-13 -3 6 -1.5991 0.2908
-13 -3 7 -0.0792 0.2820
-13 -3 8 -0.1785 -1.0444
-13 -3 9 0.6855 0.1403
-13 -2 -11 0.3697 -0.7443
-13 -2 -10 -0.5415 -2.1441
-13 -2 -9 -1.4352 0.4327
-13 -2 -8 0.1749 0.0072
-13 -2 -7 0.3291 -0.7793
-13 -2 -6 -0.2815 -0.5619
-13 -2 -5 -1.2601 -2.4038
-13 -2 -4 0.0218 1.0012
-13 -2 -3 -0.2436 -1.0274
-13 -2 -2 -1.1457 0.9748
-13 -2 -1 -0.3876 -1.9289
-13 -2 0 1.7532 -0.2299
-13 -2 1 -0.9261 1.0304
-13 -2 2 -0.1204 -2.6674
-13 -2 4 -1.2705 0.5410
-13 -2 5 0.9171 0.7037
-13 -2 6 -0.2724 1.3289
-13 -2 7 -0.9277 -1.2745
-13 -2 8 0.2997 0.5031
-13 -2 9 -0.0981 0.8367
-13 -2 10 0.0933 0.0259
-13 -2 11 0.8535 -0.2642
-13 -1 -13 0.3114 0.1256
-13 -1 -11 0.6439 -0.6108
-13 -1 -10 -0.7919 0.3769
-13 -1 -9 0.6103 -0.6786
-13 -1 -8 0.0054 -0.4291
-13 -1 -7 -0.4561 -0.5968
-13 -1 -6 2.1103 -0.5782
-13 -1 -5 1.0645 1.6994
-13 -1 -4 0.6897 -0.3146
-13 -1 -3 -2.8771 -1.4384
-13 -1 -2 0.0452 1.3179
-13 -1 -1 0.9679 1.2591
-13 -1 0 0.5797 1.4413
-13 -1 1 0.5184 0.0568
-13 -1 2 -1.1520 0.4669
-13 -1 3 0.4105 0.3376
-13 -1 4 1.3220 -0.8408
-13 -1 5 -0.3817 0.1138
-13 -1 6 0.8714 -0.7715
-13 -1 7 1.5082 0.5136
-13 -1 8 1.1795 0.3556
-13 -1 9 1.0756 0.3667
-13 -1 10 1.0304 -0.2504
-13 -1 11 0.4087 0.7312
-13 -1 12 -0.3007 -0.0687
-12 -6 -5 0.1725 0.3251
-12 -6 -4 -1.4139 1.0354
-12 -6 -3 -0.4730 0.7880
-12 -6 -2 0.1579 -0.0157
-12 -6 -1 0.1754 -0.0916
-12 -6 0 -0.3492 0.2792
-12 -6 1 -0.0868 0.5481
-12 -6 3 0.0444 0.5534
-12 -6 4 -0.8502 0.2739
-12 -5 -8 0.5578 -0.5357
-12 -5 -7 -2.0464 0.9009
-12 -5 -6 0.2419 1.0755
-12 -5 -5 -0.8885 0.1708
-12 -5 -4 -0.0000 0.4804
-12 -5 -3 0.2795 -1.5076
-12 -5 -2 -0.0865 -0.2456
-12 -5 -1 -1.1037 -0.3351
-12 -5 0 0.5433 0.7154
-12 -5 1 -0.9685 -1.4686
-12 -5 3 -0.9846 -0.4946
-12 -5 4 -0.4088 -0.5608
-12 -5 5 1.9594 -0.2172
-12 -5 6 -0.3844 -0.0503
-12 -5 7 0.0720 -0.0000
-12 -5 8 0.1827 0.5723
-12 -4 -10 1.0687 -0.5696
-12 -4 -9 -0.7567 0.2160
-12 -4 -8 0.3254 0.1030
-12 -4 -7 1.3302 -1.5236
-12 -4 -6 -0.3553 0.5886
-12 -4 -5 0.7171 -1.6492
-12 -4 -4 0.6152 -1.2813
-12 -4 -3 -1.4547 0.5084
-12 -4 -2 -0.4834 -0.6545
-12 -4 -1 0.7195 -0.2365
-12 -4 0 1.3277 -1.0107
-12 -4 1 -0.9529 -0.7952
-12 -4 2 0.3187 -0.4738
-12 -4 3 0.6015 -0.3342
-12 -4 4 -0.3514 -0.5186
-12 -4 5 0.9660 -0.6607
-12 -4 6 -0.2412 -0.3309
-12 -4 7 0.0830 0.0634
-12 -4 8 -0.4997 0.1746
-12 -4 9 -0.9524 0.4728
-12 -4 10 -1.0506 0.9304
-12 -3 -11 -0.8898 -0.9070
-12 -3 -10 0.4716 -1.1116
-12 -3 -9 0.3899 0.3484
-12 -3 -8 0.4008 0.5270
-12 -3 -7 0.1934 -0.9788
-12 -3 -6 0.5435 0.3561
-12 -3 -5 0.9950 1.7888
-12 -3 -4 -0.1430 0.1320
-12 -3 -3 -0.2677 -0.8419
-12 -3 -2 -1.5038 0.1998
-12 -3 -1 -0.1104 1.3730
-12 -3 0 -2.7651 -1.2447
-12 -3 1 1.7417 1.7575
-12 -3 2 -1.2221 0.9889
-12 -3 3 0.5745 1.0109
-12 -3 4 1.9293 0.8641
-12 -3 5 -0.2046 0.5404
-12 -3 6 0.0382 1.0794
-12 -3 7 0.6588 0.2573
-12 -3 8 0.1286 0.8779
-12 -3 9 0.0638 -0.2496
-12 -3 10 -0.6164 -0.4441
-12 -3 11 0.5473 0.3375
-12 -3 12 -0.8314 -0.1220
-12 -2 -13 -1.5871 -1.2967
-12 -2 -12 0.0642 -0.2319
-12 -2 -11 1.7943 -0.2057
-12 -2 -10 0.6033 0.1313
-12 -2 -9 0.2097 -1.7355
-12 -2 -8 -1.2478 -1.1290
-12 -2 -7 -0.8749 -0.2640
-12 -2 -6 -0.1427 0.2175
-12 -2 -5 0.1637 0.3832
-12 -2 -4 -0.1334 -1.5275
-12 -2 -3 0.2866 1.4123
-12 -2 -2 -0.1306 -0.9297
-12 -2 -1 -0.8406 -0.5437
-12 -2 0 -0.2663 0.5874
-12 -2 1 0.7542 -0.3035
-12 -2 2 0.5945 1.2026
-12 -2 3 0.3742 -0.1550
-12 -2 4 -0.3718 0.5361
-12 -2 5 -2.9202 -0.0118
-12 -2 6 -0.7863 1.2743
-12 -2 7 -0.3098 -0.0741
-12 -2 8 -0.5717 -0.2162
-12 -2 9 0.3766 0.6238
-12 -2 10 1.0530 0.7862
-12 -2 11 1.2218 -0.8284
-12 -2 12 0.7999 -0.9468
-12 -2 13 0.2216 -1.0888
-12 -1 -14 0.7490 -0.4201
-12 -1 -13 0.8503 0.0992
-12 -1 -12 0.3755 -0.3422
-12 -1 -11 0.1779 -1.2399
-12 -1 -10 0.1717 -0.3698
-12 -1 -9 -1.2224 -1.3524
-12 -1 -8 0.8164 1.4830
-12 -1 -7 0.8300 3.3016
-12 -1 -6 -1.3364 -2.2225
-12 -1 -5 -0.9743 -0.0540
-12 -1 -4 -0.3106 0.4620
-12 -1 -3 1.8792 -1.3453
-12 -1 -2 -1.3900 -1.4560
-12 -1 -1 -3.7538 -0.1203
-12 -1 0 0.4205 -0.9023
-12 -1 1 -0.8083 -1.1946
-12 -1 2 1.9309 -1.7002
-12 -1 3 0.7148 1.2756
-12 -1 4 -1.5422 0.3824
-12 -1 5 0.9214 0.4104
-12 -1 6 1.8458 -1.9238
-12 -1 7 -2.3441 -1.1169
-12 -1 8 -1.5957 3.0462
-12 -1 9 1.3183 0.4681
-12 -1 10 -0.2481 -0.0541
-12 -1 11 0.1413 -0.1000
-12 -1 12 -0.5181 0.5850
-12 -1 13 0.7255 -0.8699
-12 -1 14 0.0548 -0.5068
-11 -7 -6 1.1100 -0.0111
-11 -7 -5 1.0902 -0.4766
-11 -7 -4 -0.7383 -0.5328
-11 -7 -3 0.6410 0.4501
-11 -7 -2 -0.5621 -0.5781
-11 -7 -1 0.4836 -0.0663
-11 -7 0 -0.1946 0.0540
-11 -7 1 0.3941 -0.7918
-11 -7 2 -0.2948 1.2731
-11 -7 3 0.3912 0.3714
-11 -7 4 -0.1651 -0.2012
-11 -7 5 -0.6460 1.1431
-11 -6 -9 -0.0817 -1.4829
-11 -6 -8 -0.0885 0.1588
-11 -6 -7 1.2397 0.4768
-11 -6 -6 -0.2862 -0.8867
-11 -6 -5 0.1511 -1.1315
-11 -6 -4 0.3800 1.0479
-11 -6 -3 -0.0058 -0.2606
-11 -6 -2 -0.3590 -0.0361
-11 -6 -1 0.7884 0.0150
-11 -6 0 0.6089 0.8045
-11 -6 1 1.0036 0.6151
-11 -6 2 -1.3779 -0.4093
-11 -6 3 -0.2274 -0.2835
-11 -6 4 -0.8187 0.2262
-11 -6 5 0.3114 -0.0416
-11 -6 6 -0.3418 -1.9123
-11 -6 7 -0.4106 0.0745
-11 -5 -11 0.8938 0.0960
-11 -5 -10 0.7913 -0.2074
-11 -5 -9 0.0315 0.6185
-11 -5 -8 -0.6041 0.8036
-11 -5 -7 1.0505 -1.1303
-11 -5 -6 -1.0054 -0.3490
-11 -5 -5 -0.6235 2.1997
-11 -5 -4 -0.1158 -0.3251
-11 -5 -3 0.2845 -0.7408
-11 -5 -2 -0.2355 0.0690
-11 -5 -1 -1.5284 0.0255
-11 -5 0 0.1174 0.1067
-11 -5 1 -1.1682 1.4642
-11 -5 2 -0.2518 -1.4188
-11 -5 3 -0.6649 0.3525
-11 -5 4 -0.6652 0.0278
-11 -5 5 -0.9064 0.2021
-11 -5 6 0.6100 0.7653
-11 -5 7 -0.2818 0.8336
-11 -5 8 -0.4627 -0.2142
-11 -5 9 0.2430 -0.7594
-11 -5 10 0.0865 0.9353
-11 -4 -13 0.4404 -0.1444
-11 -4 -11 -0.1061 0.9463
-11 -4 -10 -0.0676 0.8585
-11 -4 -9 1.4502 0.1750
-11 -4 -8 0.2641 -1.7442
-11 -4 -7 -0.7725 0.3392
-11 -4 -6 0.7808 0.7986
-11 -4 -5 -1.2422 0.7187
-11 -4 -4 1.6693 0.5487
-11 -4 -3 0.3853 -1.2433
-11 -4 -2 -0.7799 0.0054
-11 -4 -1 2.7738 0.8949
-11 -4 0 -0.1553 -0.5325
-11 -4 1 -0.5713 -1.9867
-11 -4 2 0.7751 -0.8688
-11 -4 3 -1.7197 0.1145
-11 -4 4 -0.4578 -0.3185
-11 -4 5 0.9556 -0.9696
-11 -4 6 -0.5785 -0.3105
-11 -4 7 0.2427 -2.1023
-11 -4 8 0.6117 -1.3040
-11 -4 9 -0.7185 -1.5004
-11 -4 10 -0.0802 -1.5545
-11 -4 11 0.4717 -0.2572
-11 -4 12 0.3931 0.1933
-11 -3 -14 -0.1595 -0.4944
-11 -3 -13 0.1095 -0.9701
-11 -3 -12 0.2027 -0.1927
-11 -3 -11 0.0633 0.4431
-11 -3 -10 1.5289 0.7739
-11 -3 -9 0.3878 -0.7802
-11 -3 -8 -0.4617 1.0452
-11 -3 -7 2.7805 2.0299
-11 -3 -6 -0.5953 -2.1110
-11 -3 -5 -0.7736 0.1091
-11 -3 -4 0.0576 -1.3323
-11 -3 -3 -1.7686 -1.0282
-11 -3 -2 4.8263 0.7116
-11 -3 -1 -1.2732 -3.0462
-11 -3 0 -0.9125 -0.1900
-11 -3 1 -0.4211 1.0158
-11 -3 2 -2.2162 -0.5342
-11 -3 3 -0.2133 0.0213
-11 -3 4 -1.0437 -0.0600
-11 -3 5 0.5425 -1.0815
-11 -3 6 2.1004 1.5112
-11 -3 7 -1.8655 -1.8914
-11 -3 8 1.0041 0.7439
-11 -3 9 -0.4972 0.2587
-11 -3 10 0.0203 0.5736
-11 -3 11 -0.5851 -0.4128
-11 -3 12 -0.1981 -0.1314
-11 -3 13 0.2828 0.2460
-11 -2 -15 0.3559 -0.4256
-11 -2 -14 0.0774 0.5235
-11 -2 -13 1.0313 -0.0410
-11 -2 -12 1.1780 -1.2531
-11 -2 -11 -0.6839 -0.0792
-11 -2 -10 -0.0892 -0.1574
-11 -2 -9 0.0185 -0.8310
-11 -2 -8 0.5014 0.2913
-11 -2 -7 0.4032 -1.4359
-11 -2 -6 -0.3584 1.3789
-11 -2 -5 0.3325 -1.9409
-11 -2 -4 -1.3323 1.0340
-11 -2 -3 2.1659 1.1669
-11 -2 -2 -1.8847 -1.2387
-11 -2 -1 -0.4719 1.3573
-11 -2 0 0.1994 0.9458
-11 -2 1 0.4373 -0.1470
-11 -2 2 -1.4490 1.4670
-11 -2 3 -0.1134 0.5120
-11 -2 4 2.0439 0.3736
-11 -2 5 -2.6473 4.4947
-11 -2 6 1.3265 -0.3393
-11 -2 7 -0.2677 0.7977
-11 -2 8 -1.4341 0.9760
-11 -2 9 0.1539 0.1030
-11 -2 10 -0.3648 -0.6657
-11 -2 11 0.0941 0.8110
-11 -2 12 -1.1861 0.0163
-11 -2 13 1.6697 -0.3081
-11 -2 14 -0.0363 0.6011
-11 -1 -15 0.0758 -0.9903
-11 -1 -14 -0.0946 -0.6381
-11 -1 -13 1.4852 0.4551
-11 -1 -12 0.5594 0.3008
-11 -1 -11 1.2874 2.2973
-11 -1 -10 0.9849 -0.1853
-11 -1 -9 0.2225 0.4646
-11 -1 -8 0.4274 -2.2192
[truncated: 102,871 more chars]
